# Supplementary material for: Identification of Key Residues Required for RNA Silencing Suppressor Activity of p23 Protein from a Mild Strain of Citrus Tristeza Virus
Source: MDPI journal article supplement (doi:10.3390/v11090782), 2019-08-25
Supplement: s1 [file s1]

## Supplemental Data

### Supplemental Data 1. Related sequences of CTV-N4VSR expression vector

#### Sequence of pH7LIC3.0 (35S-EV)

GGGTACCCCTCGAATTATCATACATGAGAATTAAGGGAGTCACGTTATGACCCCGCCGATGACGCGGGACA  
AGCCGTTTTACGTTTGGAAGTACAGAACCGCAACGTTGAAGGAGCCACTGAGCCGCGGGTTTCTGGAGT  
TTAATGAGCTAAGCACATACGTCAGAAACCATTATTGCGCGTTCAAAAGTCGCCTAAGGTCATATCAGC  
TAGCAAATATTTCTTGTCAAAAATGCTCCACTGACGTTCCATAAATTCCCCTCGGTATCCAATTAGAGTC  
TCATATTTACTCTCAACTCGAATCCCCCTATGAAAAAGCCTGAAGTACCGCGACGTCTGTGAGAAGT  
TTCTGATCGAAAAGTTCGACAGCGTCTCCGACCTGATGCAGCTCTCGGAGGGCGAAGAATCTCGTGCTTT  
CAGCTTCGATGTAGGAGGGCGTGGATATGTCTGCGGGTAAATAGCTGCGCCGATGGTTTCTACAAAGAT  
CGTTATGTTTATCGGCACTTTGCATCGGCCGCGCTCCCGATTCCGGAAGTGCTTGACATTGGGGAGTTCA  
GCGAGAGCCTGACCTATTGCATCTCCGCGCGTGCACAGGGTGTACGTTGCAAGACCTGCCTGAAACCGA  
ACTGCCCGCTGTTCTTCAGCCGGTCGCGGAGGCTATGGATGCTATCGCTGCGGCCGATCTTAGCCAGACG  
AGCGGGTTCGGCCCATTCGGACCGCAAGGAATCGGTCAATACACTACATGGCGTGATTTTCATATGCGCGA  
TTGCTGATCCCCATGTGTATCACTGGCAAAGTGTGATGGACGACACCGTCAGTGCGTCCGTCGCGCAGGC  
TCTCGATGAGCTGATGCTTTGGGCGAGGACTGCCCCGAAGTCCGGCACTCGTGACGCGGATTTCGGCTCC  
AACAATGTCCTGACGGACAATGGCCGCATAACAGCGGTCAATTGACTGGAGCGAGGCGATGTTTCGGGGATT  
CCCAATACGAGGTCGCCAACATCTTCTTCTGGAGGCCGTGGTTGGCTTGATGGAGCAGCAGACGCGCTA  
CTTCGAGCGGAGGCATCCGGAGCTTGCAGGATCGCCAAGGCTCCGGGCGTATATGCTCCGCATTGGTCTT  
GACCAACTCTATCAGAGCTTGGTTGACGGCAATTTTCGATGATGCAGCTTGGGCGCAGGGTCGATGCGACG  
CAATCGTCCGATCCGGAGCCGGGACTGTGCGGCGTACACAAATCGCCCGCAGAAGCGCGGCCGTCTGGAC  
CGATGGCTGTGTAGAAGTACTCGCCGATAGTGAAACCGACGCCCCAGCACTCGTCCGAGGGCAAAGGAA  
TAGAGTAGATGCCGACCGAACAAGAGCTGATTTTCGAGAACGCCTCAGCCAGCAACTCGCGCGAGCCTAGC  
AAGGCAAATGCGAGAGAACGGCCTTACGCTTGGTGGCACAGTTCTCGTCCACAGTTCGCTAAGCTCGCTC  
GGCTGGGTGCGGGGAGGCCGGTTCGAGTGATTACAGGAATTAATTCCTAGAGTCAAGCAGATCGTTCAA  
ACATTTGGCAATAAAGTTTCTTAAGATTGAATCCTGTTGCCGGTCTTGCATGATTATCATATAATTTCT  
GTTGAATTACGTTAAGCATGTAATAATTAACATGTAATGCATGACGTTATTTATGAGATGGGTTTTTATG  
ATTAGAGTCCCGCAATTATACATTTAATACGCGATAGAAAACAAAATATAGCGCGCAAAGTACGATAAAT  
TATCGCGCGCGGTGTATCTATGTTACTAGATCGACCGGCATGCAAGCTGATAATTCAATTCGGCGTTAA  
TTCAGTACATTAAAAACGTCCGCAATGTGTATTAAAGTTGTCTAAGCGTCAATTTGTTTACACCACAATA  
TATCCTGCCACCAGCCAGCCAACAGCTCCCCGACCGGCAGCTCGGCACAAAATCACCACCTCGATACAGGC  
AGCCCATCAGTCCGGGACGGCGTCAGCGGGAGAGCCGTTGTAAGGCGGCAGACTTTGCTCATGTTACCGA  
TGCTATTTCGGAAGAACGGCAACTAAGCTGCCGGGTTTGAAACACGGATGATCTCGCGGAGGGTAGCATGT  
TGATTGTAACGATGACAGAGCGTTGCTGCCTGTGATCAATTTCGGGCACGAACCCAGTGGACATAAGCCTC  
GTTCCGTTTCGTAAGCTGTAATGCAAGTAGCGTAAGTCCGTCACGCAACTGGTCCAGAACCCTTGACCGAA  
CGCAGCGGTGGTAACGGCGCAGTGGCGGTTTTTCATGGCTTCTTGTTATGACATGTTTTTTTGGGGTACAG  
TCTATGCCTCGGGCATCCAAGCAGCAAGCGGTTACGCCGTGGGTGATGTTTGATGTTATGGAGCAGCA  
ACGATGTTACGCAGCAGGGCAGTCGCCCTAAAACAAAGTTAAACATCATGGGGGAAGCGGTGATCGCCGA  
AGTATCGACTCAACTATCAGAGGTAGTTGGCGTCATCGAGCGCCATCTCGAACCGACGTTGCTGGCCGTA  
CATTTGTACGGCTCCGCACTGGATGGCGGCCTGAAGCCACACAGTGATATTGATTTGCTGGTTACGGTGA  
CCGTAAGGCTTGATGAAACAACGCGCGAGCTTTGATCAACGACCTTTTGAAACTTCGGCTTCCCTGG

AGAGAGCGAGATTCTCCGCGCTGTAGAAGTCACCATTGTTGTGCACGACGACATCATTCCTGGCGTTAT  
CCAGCTAAGCGCGAACTGCAATTTGGAGAATGGCAGCGCAATGACATTCTTGACGGTATCTTCGAGCCAG  
CCACGATCGACATTGATCTGGCTATCTTGCTGACAAAAGCAAGAGAACATAGCGTTGCCTTGGTAGGTCC  
AGCGGCGGAGGAACCTTTTGATCCGGTTCCTGAACAGGATCTATTTGAGGCGCTAAATGAAACCTTAACG  
CTATGGAACCTCGCCGCCGACTGGGCTGGCGATGAGCGAAATGTAGTGCTTACGTTGTCCCGCATTTGGT  
ACAGCGCAGTAACCGGCAAAATCGCGCCGAAGGATGTCGCTGCCGACTGGGCAATGGAGCGCTGCCGGC  
CCAGTATCAGCCCGTCATACTTGAAGCTAGACAGGCTTATCTTGACAGAAGAAGATCGCTTGGCCTCG  
CGCGCAGATCAGTTGGAAGAATTTGTCCACTACGTGAAAGGCGAGATCACCAAGGTAGTCGGCAAATAAT  
GTCTAGCTAGAAATTCGTTCAAGCCGACGCCGCTTCGCCGGCGTTAACTCAAGCGATTAGATGCACTAAG  
CACATAATTGCTCACAGCCAACTATCAGGTCAAGTCTGCTTTTATTATTTTAAAGCGTGATAATAAGC  
CCTACACAAATTGGGAGATATATCATGCATGACCAAAATCCCTTAACGTGAGTTTTCGTTCCACTGAGCG  
TCAGACCCCGTAGAAAAGATCAAAGGATCTTCTTGAGATCCTTTTTTCTGCGCGTAATCTGCTGCTTGC  
AAACAAAAAAACCACCGCTACCAGCGGTGGTTTGTTCGCCGGATCAAGAGCTACCAACTCTTTTTCCGAA  
GGTAACTGGCTTCAGCAGAGCGCAGATACCAAATACTGTCTTCTAGTGTAGCCGTAGTTAGGCCACCAC  
TTCAAGAACTCTGTAGCACCGCCTACATACCTCGCTCTGCTAATCCTGTTACCAGTGGCTGCTGCCAGTG  
GCGATAAGTCGTGTCTTACCGGGTTGGACTCAAGACGATAGTTACCGGATAAGGCGCAGCGGTTCGGGCTG  
AACGGGGGGTTTCGTGCACACAGCCCAGCTTGGAGCGAACGACCTACACCGAACTGAGATACCTACAGCGT  
GAGCTATGAGAAAGCGCCACGCTTCCCGAAGGGAGAAAGGCGGACAGGTATCCGTAAGCGGCAGGGTCG  
GAACAGGAGAGCGCACGAGGGAGCTTCCAGGGGGAAACGCCTGGTATCTTTATAGTCCTGTCGGGTTTCG  
CCACCTCTGACTTGAGCGTCGATTTTTGTGATGCTCGTCAGGGGGCGGAGCCTATGGA AAAACGCCAGC  
AACGCGGCCTTTTTACGGTTCTTGCCCTTTTGCTGGCCTTTTGCTCACATGTTCTTTCCTGCGTTATCCC  
CTGATTCTGTGGATAACCGTATTACCGCCTTTGAGTGAGCTGATACCGCTCGCCGCAGCCGAACGACCGA  
GCGCAGCGAGTCAGTGAGCGAGGAAGCGGAAGAGCGCCTGATGCGGTATTTCTCCTTACGCATCTGTGC  
GGTATTTACACCGCATATGGTGCACCTCAGTACAATCTGCTCTGATGCCGCATAGTTAAGCCAGTATA  
CACTCCGCTATCGCTACGTGACTGGGTGATGGCTGCGCCCCGACACCCGCCAACACCCGCTGACGCGCCC  
TGACGGGCTTGTCTGCTCCCGGCATCCGCTTACAGACAAGCTGTGACCGTCTCCGGGAGCTGCATGTGTC  
AGAGGTTTTACCGTCAATACCGAAACGCGCGAGGCAGGGTGCCCTTGATGTGGGCGCCGCGGTTCGAGTG  
GCGACGCGCGGCTTGTCGCGCCCTGGTAGATTGCCTGGCCGTAGGCCAGCCATTTTTGAGCGGCCAGC  
GGCCGCGATAGGCCGACGCGAAGCGGCGGGCGTAGGGAGCGCAGCGACCGAAGGGTAGGCGCTTTTTGC  
AGCTCTTCGGCTGTGCGCTGGCCAGACGTTATGCACAGGCCAGGCGGGTTTTAAGAGTTTTAATAAGTT  
TTAAAGAGTTTTAGGCGGAAAAATCGCCTTTTTTCTCTTTTATATCAGTCACTTACATGTGTGACCGGTT  
CCCAATGTACGGCTTTGGGTTCCCAATGTACGGGTTCCGTTCCCAATGTACGGCTTTGGGTTCCCAATG  
TACGTGCTATCCACAGGAAAGAGACCTTTTCGACCTTTTCCCCTGCTAGGGCAATTTGCCCTAGCATCT  
GCTCCGTACATTAGGAACCGGCGGATGCTTCGCCCTCGATCAGGTTGCGGTAGCGCATGACTAGGATCGG  
GCCAGCCTGCCCCGCTCCTCCTTCAAATCGTACTCCGGCAGGTCAATTTGACCCGATCAGCTTGCGCACG  
GTGAAACAGAACTTCTTGAACCTCTCCGGCGCTGCCACTGCGTTCGTAGATCGTCTTGAACAACCATCTGG  
CTTCTGCCTTGCTGCGGCGCGGCGTGCCAGGCGGTAGAGAAAACGGCCGATGCCGGGATCGATCAAAAA  
GTAATCGGGGTGAACCGTCAGCACGTCCGGGTTCTTGCCCTTCTGTGATCTCGCGGTACATCCAATCAGCT  
AGCTCGATCTCGATGTACTCCGGCCGCCGCTTTCGCTCTTTACGATCTTGTAGCGGCTAATCAAGGCTT  
CACCTTCGGATACCGTCACCAGGCGGCCGTTCTTGCCCTTCTTCGTACGCTGCATGGCAACGTGCGTGGT  
GTTTAACCGAATGCAGGTTTCTACCAGGTCGTCTTCTGCTTTCGCCCATCGGCTCGCCGGCAGAACTTG  
AGTACGTCCGCAACGTGTGGACGGAACACGCGGCCGGGCTTGTCTCCCTTCCCTTCCCGGTATCGGTTCA  
TGGATTTCGGTTAGATGGGAAACGCCCATCAGTACCAGGTCGTAATCCACACACTGGCCATGCCGGCCGG  
CCCTGCGGAAACCTCTACGTGCCCCTGGAAGCTCGTAGCGGATCACCTCGCCAGCTCGTCGGTCACGC

TTCGACAGACGGAAAACGGCCACGTCCATGATGCTGCGACTATCGCGGGTGCCACGTCATAGAGCATCG  
GAACGAAAAAATCTGGTTGCTCGTCGCCCTTGGGCGGCTTCCTAATCGACGGCGCACCGGCTGCCGGCGG  
TTGCCGGGATTCTTTGCGGATTGATCAGCGGCCGCTTGCCACGATTCACCGGGGCGTGCTTCTGCCTCG  
ATGCGTTGCCGCTGGGCGGCCGTGCGCGGCTTCAACTTCTCCACCAGGTCATACCCAGCGCCGCGCCGA  
TTTGTACCGGGCCGGATGGTTTGCGACCGTCACGCCGATTCTCGGGCTTGGGGGTTCCAGTGCCATTGC  
AGGGCCGGCAGACAACCCAGCCGCTTACGCCTGGCCAACCGCCCGTTCTCCACACATGGGGCATTCCAC  
GGCGTCGGTGCCCTGGTTGTTCTTGATTTTCCATGCCGCCCTCTTTAGCCGCTAAAATTCATCTACTCATT  
TATTCAATTGCTCATTTACTCTGGTAGCTGCGCGATGTATTAGATAGCAGCTCGGTAATGGTCTTGCCCT  
TGGCGTACCGCGTACATCTTCAGCTTGGTGTGATCCTCCGCCGGCAACTGAAAGTTGACCCGCTTCATGG  
CTGGCGTGTCTGCCAGGCTGGCCAACGTTGCAGCCTTGCTGCTGCGTGCGCTCGGACGGCCGGCACTTAG  
CGTGTTTGTGCTTTTGCTCATTTTCTCTTTACCTCATTAACCTCAAATGAGTTTTGATTTAATTTACGCGG  
CCAGCGCCTGGACCTCGCGGGCAGCGTCGCCCTCGGGTTCTGATTCAAGAACGGTTGTGCCGGCGGCGGC  
AGTGCTTGGGTAGCTCAGCGCTGCGTGATACGGGACTCAAGAATGGGCAGCTCGTACCCGGCCAGCGCC  
TCGGCAACCTCACCGCCGATGCGCGTGCCCTTTGATCGCCCGCGACACGACAAAAGCCGCTTGATAGCCTTC  
CATCCGTGACCTCAATGCGCTGCTTAACCAGCTCCACCAGGTCGGCGGTGGCCCATATGTCTGAAGGGCT  
TGGCTGCACCGGAATCAGCACGAAGTCGGCTGCCTTGATCGCGGACACAGCCAAGTCCGCCGCCTGGGGC  
GCTCCGTGATCACTACGAAGTCGCGCCGCGCGATGGCCTTCACGTGCGGGTCAATCGTCGGGCGGTGCGA  
TGCCGACAACGGTTAGCGGTTGATCTTCCCGCACGGCCGCCAATCGCGGGCACTGCCCTGGGGATCGGA  
ATCGACTAACAGAACATCGGCCCCGGCGAGTTGCAGGGCGCGGGCTAGATGGGTTGCGATGGTCTGCTTG  
CCTGACCCGCCTTTCTGGTTAAGTACAGCGATAACCTTCATGCGTTCCCTTGCGTATTTGTTTATTAC  
TCATCGCATCATATACGACGACCGCATGACGCAAGCTGTTTTACTCAAATACACATCACCTTTTTAGA  
CGGCGGCGCTCGGTTTCTTCAGCGGCCAAGCTGGCCGGCCAGGCCGCCAGCTTGGCATCAGACAAACCGG  
CCAGGATTTTCATGCAGCCGCACGGTTGAGACGTGCGCGGGCGGCTCGAACACGTACCCGGCCGCGATCAT  
CTCCGCTCGATCTCTTCGGTAATGAAAAACGGTTTCGTCTGGCCGTCTGGTGCGGTTTCATGCTTGTT  
CCTCTTGCGGTTTCAATCTCGGCGGCCGCCAGGGCGTCGGCTCGGTCAATGCGTCTCACGGAAGGCACC  
GCGCCGCCTGGCCTCGGTGGGCGTCACTTCCTCGCTGCGCTCAAGTGCGCGGTACAGGGTCGAGCGATGC  
ACGCCAAGCAGTGCAGCCGCCTCTTTCAGGTGCGGCCCTTCCTGGTCGATCAGCTCGCGGGCGTGCGGA  
TCTGTGCCGGGTGAGGGTAGGGCGGGGCCAACTTCACGCCTCGGGCCTTGCGGGCTCGCGCCCGCT  
CCGGGTGCGGTGATGATTAGGGAACGCTCGAACTCGGCAATGCCGGCGAACACGGTCAACACCATGCGG  
CCGGCCGGCGTGGTGGTGTCGGCCCCACGGCTCTGCCAGGCTACGCAGGCCCGCGCCGGCCTCCTGGATGC  
GCTCGGCAATGTCCAGTAGGTGCGGGTGCTGCGGGCCAGGCGGTCTAGCCTGGTCACTGTACAACGTC  
GCCAGGGCGTAGGTGGTCAAGCATCCTGGCCAGCTCCGGGCGGTGCGCCTGGTGCCGGTGATCTTCTCG  
GAAAACAGCTTGGTGACGCCGGCCGCGTGACGTTCCGGCCGTTGGTTGGTCAAGTCCTGGTCGTCGGTGC  
TGACGCGGGCATAGCCAGCAGGCCAGCGGCGGCGCTCTTGTTTCATGGCGTAATGTCTCCGGTTCTAGTC  
GCAAGTATTCTACTTTATGCGACTAAAACACGCGACAAGAAAACGCCAGGAAAAGGGCAGGGCGGCAGCC  
TGTCGCGTAACCTTAGGACTTGTGCGACATGTCGTTTTTCAAGACGGCTGCACTGAACGTGAGAAGCCGA  
CTGCACTATAGCAGCGAGGGGTTGGATCAAAGTACTTTGATCCCGAGGGGAACCCTGTGGTTGGCATGC  
ACATACAAATGGACGAACGGATAAACCTTTTCAGGCCCTTTTAAATATCCGTTATTCTAATAAACGCTCT  
TTTCTCTTAGGTTTACCCGCCAATATATCCTGTCAAACACTGATAGTTTAACTGAAGCGGGAAACGAC  
AATCTGATCCAAGCTCAAGCTAAGCTTGAGCTCTGCATGCCTGCAGGTCCCCAGATTAGCCTTTTCAATT  
TCAGAAAGAATGCTAACCCACAGATGGTTAGAGAGGCTTACGCAGCAGGTCTCATCAAGACGATCTACCC  
GAGCAATAATCTCCAGGAAATCAAATACCTTCCCAAGAAGGTTAAAGATGCAGTCAAAAGATTCAGGACT  
AACTGCATCAAGAACACAGAGAAAGATATATTTCTCAAGATCAGAAGTACTATTCCAGTATGGACGATTC  
AAGGCTTGCTTCACAAACCAAGGCAAGTAATAGAGATTGGAGTCTCTAAAAGGTAGTTCCCACTGAATC

AAAGGCCATGGAGTCAAAGATTCAAATAGAGGACCTAACAGAACTCGCCGTAAAGACTGGCGAACAGTTC  
ATACAGAGTCTCTTACGACTCAATGACAAGAAGAAAATCTTCGTCAACATGGTGGAGCACGACACACTTG  
TCTACTCCAAAAATATCAAAGATACAGTCTCAGAAGACCAAAGGGCAATTGAGACTTTTCAACAAAGGGT  
AATATCCGGAAACCTCCTCGGATTCCATTGCCAGCTATCTGTCACTTTATTGTGAAGATAGTGGAAAAG  
GAAGGTGGCTCCTACAAATGCCATCATTGCGATAAAGGAAAGGCCATCGTTGAAGATGCCTCTGCCGACA  
GTGGTCCCAAAGATGGACCCCCACCCACGAGGAGCATCGTGAAAAAGAAGACGTTCCAACCACGTCTTC  
AAAGCAAGTGGATTGATGTGATATCTCCACTGACGTAAGGGATGACGCACAATCCCACTATCCTTCGCAA  
GACCCTTCTCTATATAAGGAAGTTCATTTTCATTTGGAGAGAACACGGGGGACTCTAGAGGATCCAAGGA  
GATATAACATGCCACCATGGATTACAAGGACGATGATGACAAGGACTACAAGGACGATGACGATAAGGAC  
TATAAGGATGACGATGACAAGGATTACGCCGAGGCCTCTTCCCTAATGATATCCCGCGCCATGCTAGAG  
TCCGCAAAAAATCACCAGTCTCTCTCTACAAATCTATCTCTCTATTTTTCTCCAGAATAATGTGTGAGT  
AGTTCCAGATAAGGGAATTAGGGTTCTTATAGGGTTTCGCTCATGTGTTGAGCATATAAGAAACCCTTA  
GTATGTATTTGTATTTGTAATACTTCTATCAATAAAATTTCTAATTCCTAAAACCAAAATCCAGTGAC  
CTGCAGGCATGCGACGTCG

### Sequence of pH7LIC3.1.1-N4CP (35S-N4CP)

GGGTACCTCGAATTATCATACATGAGAATTAAGGGAGTCACGTTATGACCCCGCCGATGACGCGGGACA  
AGCCGTTTTACGTTTGAACTGACAGAACC GCAACGTTGAAGGAGCCACTGAGCCGCGGGTTTCTGGAGT  
TTAATGAGCTAAGCACATACGTCAGAAACCATTATTGCGCGTTCAAAAGTCGCCTAAGGTCATATCAGC  
TAGCAAATATTTCTTGTCAAAAATGCTCCACTGACGTTCCATAAATTCCTCGGTATCCAATTAGAGTC  
TCATATTTACTCTCAACTCGAATCCCCCTATGAAAAAGCCTGAAGTACCCGCGACGTCTGTGAGAAGT  
TTCTGATCGAAAAGTTCGACAGCGTCTCCGACCTGATGCAGCTCTCGGAGGGCGAAGAATCTCGTGCTTT  
CAGCTTCGATGTAGGAGGGCGTGATATGTCTGCGGGTAAATAGCTGCGCCGATGGTTTCTACAAAGAT  
CGTTATGTTTATCGGCACTTTGCATCGGCCGCGCTCCCGATTCCGGAAGTGCTTGACATTGGGGAGTTCA  
GCGAGAGCCTGACCTATTGCATCTCCCGCCGTGCACAGGGTGTACGTTGCAAGACCTGCCTGAAACCGA  
ACTGCCCCGTGTTCTTCAGCCGGTTCGCGGAGGCTATGGATGCTATCGCTGCGGCCGATCTTAGCCAGACG  
AGCGGGTTTCGGCCCATTCGGACCGCAAGGAATCGGTCAATACACTACATGGCGTGATTTATATGCGCGA  
TTGCTGATCCCCATGTGTATCACTGGCAAACGTGTGATGGACGACACCGTCAGTGCGTCCGTCGCGCAGGC  
TCTCGATGAGCTGATGCTTTGGGCGAGGACTGCCCCGAAGTCCGGCACTCGTGACGCGGATTTCGGCTCC  
AACAAATGTCCTGACGGACAATGGCCGCATAACAGCGGTCAATTGACTGGAGCGAGGCGATGTTCCGGGGATT  
CCCAATACGAGGTCGCCAACATCTTCTTCTGGAGGCCGTGGTTGGCTTGATGGAGCAGCAGACGCGCTA  
CTTCGAGCGGAGGCATCCGGAGCTTGCAGGATCGCCAAGGCTCCGGGCGTATATGCTCCGCATTGGTCTT  
GACCAACTCTATCAGAGCTTGGTTGACGGCAATTTTCGATGATGCAGCTTGGGCGCAGGGTCGATGCGACG  
CAATCGTCCGATCCGGAGCCGGGACTGTGCGGCGTACACAAATCGCCCGCAGAAGCGCGGCCGTCTGGAC  
CGATGGCTGTGTAGAAGTACTCGCCGATAGTGGAACCGACGCCCCAGCACTCGTCCGAGGGCAAAGGAA  
TAGAGTAGATGCCGACCGAACAAGAGCTGATTTTCGAGAACGCCTCAGCCAGCAACTCGCGCGAGCCTAGC  
AAGGCAAAATGCGAGAGAACGGCCTTACGCTTGGTGGCACAGTTCTCGTCCACAGTTCGCTAAGCTCGCTC  
GGCTGGGTGCGGGAGGGCCGGTTCGAGTGATTACAGGAATTAATTCCTAGAGTCAAGCAGATCGTTCAA  
ACATTTGGCAATAAAGTTTCTTAAGATTGAATCCTGTTGCCGGTCTTGCGATGATTATCATATAATTTCT  
GTTGAATTACGTTAAGCATGTAATAATTAACATGTAATGCATGACGTTATTTATGAGATGGGTTTTTATG  
ATTAGAGTCCCGCAATTATACATTTAATACGCGATAGAAAACAAAATATAGCGCGCAAACTAGGATAAAT  
TATCGCGCGGGTGTCTATGTTACTAGATCGACCGGCATGCAAGCTGATAATTCAATTCGGCGTTAA  
TTCAGTACATTAAAAACGTCCGCAATGTGTATTAAAGTTGTCTAAGCGTCAATTTGTTTACACCACAATA  
TATCCTGCCACCAGCCAGCCAACAGCTCCCCGACCGGCAGCTCGGCACAAAATCACCCTCGATACAGGC

AGCCCATCAGTCCGGGACGGCGTCAGCGGGAGAGCCGTTGTAAGGCGGCAGACTTTGCTCATGTTACCGA  
TGCTATTCCGAAGAACGGCAACTAAGCTGCCGGGTTTGAAACACGGATGATCTCGCGGAGGGTAGCATGT  
TGATTGTAACGATGACAGAGCGTTGCTGCCTGTGATCAATTTCGGGCACGAACCCAGTGGACATAAGCCTC  
GTTCCGGTTCGTAAGCTGTAATGCAAGTAGCGTAACTGCCGTACGCAACTGGTCCAGAACCTTGACCGAA  
CGCAGCGGTGGTAACGGCGCAGTGGCGGTTTTTCATGGCTTCTTGTTATGACATGTTTTTTTTGGGGTACAG  
TCTATGCCTCGGGCATCCAAGCAGCAAGCGCGTTACGCCGTGGGTCGATGTTTGATGTTATGGAGCAGCA  
ACGATGTTACGCAGCAGGGCAGTCGCCCTAAAACAAAGTTAAACATCATGGGGGAAGCGGTGATCGCCGA  
AGTATCGACTCAACTATCAGAGGTAGTTGGCGTCATCGAGCGCCATCTCGAACCGACGTTGCTGGCCGTA  
CATTTGTACGGCTCCGCAGTGGATGGCGGCCTGAAGCCACACAGTGATATTGATTTGCTGGTTACGGTGA  
CCGTAAGGCTTGATGAAACAACGCGCGAGCTTTTGATCAACGACCTTTTGAAACTTCGGCTTCCCCTGG  
AGAGAGCGAGATTCTCCGCGCTGTAGAAGTACCATTGTTGTGCACGACGACATCATTCCTGGCGTTAT  
CCAGCTAAGCGCAACTGCAATTTGGAGAATGGCAGCGCAATGACATTCTTGACAGGTATCTTCGAGCCAG  
CCACGATCGACATTGATCTGGCTATCTTGCTGACAAAAGCAAGAGAACATAGCGTTGCCTTGGTAGGTCC  
AGCGGCGGAGGAACCTTTTGATCCGGTTCTGAACAGGATCTATTTGAGGCGCTAAATGAAACCTTAACG  
CTATGGAACCTCGCCGCCGACTGGGCTGGCGATGAGCGAAATGTAGTGCTTACGTTGTCCCGCATTTGGT  
ACAGCGCAGTAACCGGCAAAATCGCGCCGAAGGATGTGCTGCCGACTGGGCAATGGAGCGCTGCCGGC  
CCAGTATCAGCCCGTCATACTTGAAGCTAGACAGGCTTATCTTGACAGAAGAAGATCGCTTGGCCTCG  
CGCGCAGATCAGTTGGAAGAATTTGTCCACTACGTGAAAGGCGAGATCACCAAGGTAGTCGGCAAATAAT  
GTCTAGCTAGAAATTCGTTCAAGCCGACGCCGCTTCGCCGGCGTTAACTCAAGCGATTAGATGCACTAAG  
CACATAATTGCTCACAGCCAAACTATCAGGTCAAGTCTGCTTTTATTATTTTTAAGCGTGCATAATAAGC  
CCTACACAAATTGGGAGATATATCATGCATGACCAAAATCCCTTAACGTGAGTTTTTCGTTCCACTGAGCG  
TCAGACCCCGTAGAAAAGATCAAAGGATCTTCTTGAGATCCTTTTTTTCTGCGCGTAATCTGCTGCTTGC  
AAACAAAAAACCACCGCTACCAGCGGTGGTTTTGTTTGGCGGATCAAGAGCTACCAACTCTTTTTCCGAA  
GGTAACTGGCTTCAGCAGAGCGCAGATACCAAAATACTGTCTTCTAGTGTAGCCGTAGTTAGGCCACCAC  
TTCAAGAACTCTGTAGCACCGCCTACATACCTCGCTCTGCTAATCCTGTTACCAGTGGCTGCTGCCAGTG  
GCGATAAGTCGTGTCTTACCGGGTTGGACTCAAGACGATAGTTACCGGATAAGGCGCAGCGGTCCGGGCTG  
AACGGGGGGTTTCGTGCACACAGCCCAGCTTGGAGCGAACGACCTACACCGAACTGAGATACCTACAGCGT  
GAGCTATGAGAAAGCGCCACGCTTCCCGAAGGGAGAAAGGCGGACAGGTATCCGTAAGCGGCAGGGTCG  
GAACAGGAGAGCGCACGAGGGAGCTTCCAGGGGGAAACGCCTGGTATCTTTATAGTCCTGTGCGGTTTTCG  
CCACCTCTGACTTGAGCGTCGATTTTTTGATGCTCGTCAGGGGGCGGAGCCTATGAAAAACGCCAGC  
AACGCGGCCTTTTTACGGTTCTTGGCCTTTTGCTGGCCTTTTGCTCACATGTTCTTTCTGCGTTATCCC  
CTGATTCTGTGGATAACCGTATTACCGCCTTTGAGTGAGCTGATACCGCTCGCCGCAGCCGAACGACCGA  
GCGCAGCGAGTCAGTGAGCGAGGAAGCGGAAGAGCGCCTGATGCGGTATTTCTCCTTACGCATCTGTGC  
GGTATTTACACCCGATATGGTGCACCTCAGTACAATCTGCTCTGATGCCGATAGTTAAGCCAGTATA  
CACTCCGCTATCGCTACGTGACTGGGTGCTGGCTGCGCCCCGACACCCGCCAACACCCGCTGACGCGCCC  
TGACGGGCTTGTCTGCTCCCGGCATCCGCTTACAGACAAGCTGTGACCGTCTCCGGGAGCTGCATGTGTC  
AGAGGTTTTACCGTCATCACCGAAACGCGGAGGCAGGGTGCCCTTGATGTGGGCGCCGGCGGTGAGTG  
GCGACGGCGCGGCTTGTCGCGCCCTGGTAGATTGCCGTGGCCGTAGGCCAGCCATTTTTGAGCGGCCAGC  
GGCCGCGATAGGCCGACGCGAAGCGCGGGGCGTAGGGAGCGCAGCGACCGAAGGGTAGGCGCTTTTTGC  
AGCTCTTCGGCTGTGCGCTGGCCAGACAGTTATGCACAGGCCAGGCGGGTTTTAAGAGTTTTAATAAGTT  
TTAAGAGTTTTAGGCGGAAAAATCGCCTTTTTTCTCTTTTATATCAGTCACTTACATGTGTGACCGGTT  
CCCAATGTACGGCTTTGGGTTCCTAATGTACGGGTTCCGGTTCCCAATGTACGGCTTTGGGTTCCTAATG  
TACGTGCTATCCACAGGAAAGAGACCTTTTCGACCTTTTCCCCTGCTAGGGCAATTTGCCCTAGCATCT  
GCTCCGTACATTAGGAACCGGCGGATGCTTCGCCCTCGATCAGGTTGCGGTAGCGCATGACTAGGATCGG

GCCAGCCTGCCCCGCTCCTCCTTCAAATCGTACTCCGGCAGGTCATTTGACCCGATCAGCTTGCGCACG  
GTGAAACAGAACTTCTTGAACCTCTCCGGCGCTGCCACTGCGTTCTGTAGATCGTCTTGAACAACCATCTGG  
CTTCTGCCTTGCTGCGGCGCGGCGTGCCAGGCGGTAGAGAAAACGGCCGATGCCGGGATCGATCAAAAA  
GTAATCGGGGTGAACCGTCAGCACGTCCGGGTCTTGCCTTCTGTGATCTCGCGGTACATCCAATCAGCT  
AGCTCGATCTCGATGTACTCCGGCCGCCCGGTTTCGCTCTTTACGATCTTGATAGCGGCTAATCAAGGCTT  
CACCTCGGATACCGTCACCAGGCGGCGCTTCTTGGCCTTCTTCGTACGCTGCATGGCAACGTGCGTGGT  
GTTTAACCGAATGCAGGTTTCTACCAGGTCGTCTTTCTGCTTTCCGCCATCGGCTCGCCGGCAGAACTTG  
AGTACGTCCGCAACGTGTGGACGGAACACGCGGCCGGGCTTGTCTCCCTTCCCTTCCGGTATCGGTTCA  
TGGATTGCGTTAGATGGGAAACGCCATCAGTACCAGGTCGTAATCCACACACTGGCCATGCCGGCCGG  
CCCTGCGGAAACCTCTACGTGCCCCTTGAAGCTCGTAGCGGATCACCTCGCCAGCTCGTCGGTCACGC  
TTTCACAGACGGAACCGCCACGTCCATGATGCTGCGACTATCGCGGGTGGCCACGTATAGAGCATCG  
GAACGAAAAAATCTGGTTGCTCGTCGCCCTTGGGCGGCTTCCTAATCGACGGCGCACCGGCTGCCGGCGG  
TTGCCGGGATTCTTTGCGGATTGATCAGCGGCGCGCTTGCCACGATTCACCGGGGCGTGCTTCTGCCTCG  
ATGCGTTGCCGCTGGGCGGCTGCGCGGCTTCAACTTCTCCACCAGGTCATACCCAGCGCCGCGCCGA  
TTTGTACCGGGCCGGATGGTTTGCAGCCGTCACGCCGATTCTCGGGCTTGGGGGTTCCAGTGCCATTGC  
AGGGCCGGCAGACAACCCAGCCGCTTACGCCTGGCCAACCGCCCGTTCTCCACACATGGGGCATTCCAC  
GGCGTCGGTGCTGCTTGTCTTGTATTTCCATGCCGCTCCTTTAGCCGCTAAAATTCATCTACTCATT  
TATTCATTTGCTCATTTACTCTGGTAGCTGCGCGATGTATTAGATAGCAGCTCGGTAATGGTCTTGCCT  
TGGCGTACCGCGTACATCTCAGCTTGGTGTGATCTCCGCCGGCAACTGAAAGTTGACCCGCTTCATGG  
CTGGCGTGTCTGCCAGGCTGGCCAACGTTGCAGCCTTGCTGCTGCGTGCCTCGGACGGCCGGCACTTAG  
CGTGTTTGTGCTTTTGTCTATTTCTCTTTACCTCATTAACCAAATGAGTTTTGATTTAATTTACGCGG  
CCAGCGCTGGACCTCGCGGGCAGCGTCGCCCTCGGGTTCTGATTCAAGAACGGTTGTGCCGGCGGCGGC  
AGTGCTTGGGTAGCTCACGCGCTGCGTGATACGGGACTCAAGAATGGGCAGCTCGTACCCGGCCAGCGCC  
TCGGCAACCTCACCGCCGATGCGCGTGCTTTGATCGCCCGGACACGACAAAAGCCGCTTGATAGCCTTC  
CATCCGTGACCTCAATGCGCTGCTTAACCAGCTCCACCAGGTCGGCGGTGGCCCATATGTCGTAAGGGCT  
TGGCTGCACCGGAATCAGCACGAAGTCGGCTGCCTTGATCGCGGACACAGCCAAGTCCGCCGCTGGGGC  
GCTCCGTGATCACTACGAAGTCGCGCCGGCCGATGGCCTTCACGTGCGGTCATCGTCGGGCGGTGCA  
TGCCGACAACGGTTAGCGGTTGATCTTCCCGCACGGCCGCCAATCGCGGGCACTGCCCTGGGGATCGGA  
ATCGACTAACAGAACATCGGCCCCGGCGAGTTGCAGGGCGCGGGCTAGATGGGTTGCGATGGTCTGCTTG  
CCTGACCCGCTTTCTGGTTAAGTACAGCGATAACCTTCATGCGTTCCCTTGCGTATTTGTTTATTAC  
TCATCGCATCATATACGACGACCGCATGACGCAAGCTGTTTTACTCAAATACACATCACCTTTTTAG  
CGGCGGCGCTCGGTTTCTTCAGCGGCAAGCTGGCCGGCCAGGCCGCCAGCTTGGCATCAGACAAACCGG  
CCAGGATTTTCATGCAGCCGACGTTGAGACGTGCGCGGGCGGCTCGAACACGTACCCGGCCGCGATCAT  
CTCCGCCTCGATCTCTTCGGTAATGAAAAACGGTTGCTCCTGGCCGTCCTGGTGCGGTTTCATGCTTGT  
CCTCTTGGCGTTTATTCTCGGCGGCCGAGGGCGTCGGCTCGGTCAATGCGTCCTACGGAAGGCACC  
GCGCCGCTGGCCTCGGTGGGCGTCACTTCCTCGCTGCGCTCAAGTGCAGGTCAGGGTCGAGCGATGC  
ACGCCAAGCAGTGCAGCCGCTCTTTACGGTGCGGCTTCCTGGTCGATCAGCTCGCGGGCGTGCGCA  
TCTGTGCCGGGTGAGGGTAGGGCGGGGCCAACTTCACGCCTCGGGCCTTGGCGGCTCGCGCCCGCT  
CCGGGTGCGGTCGATGATTAGGGAACGCTCGAACTCGGCAATGCCGGCGAACACGGTCAACACCATGCGG  
CCGGCCGGCGTGGTGGTGTCGGCCACGGCTCTGCCAGGCTACGCAGGCCCGCGCCGGCCTCTGGATGC  
GCTCGGCAATGTCCAGTAGGTGCGGGTGCTGCGGGCCAGGCGGTCTAGCCTGGTCACTGTACAACGTC  
GCCAGGGCGTAGGTGGTCAAGCATCCTGGCCAGCTCCGGGCGGTGCGGCCTGGTGCCGGTGATCTTCTCG  
GAAACAGCTTGGTGACGCCGGCCGCTGCAGTTCGGCCCGTTGGTTGGTCAAGTCCTGGTCGTGCGTGC  
TGACGCGGGCATAGCCAGCAGGCCAGCGCGGCGCTCTGTTCATGGCGTAATGTCTCCGGTTCTAGTC

GCAAGTATTCTACTTTTATGCGACTAAAACACGCGACAAGAAAACGCCAGGAAAAGGGCAGGGCGGCAGCC  
TGTCGCGTAACCTTAGGACTTGTGCGACATGTCGTTTTTCAGAAGACGGCTGCACTGAACGTCAGAAGCCGA  
CTGCACTATAGCAGCGGAGGGGTTGGATCAAAGTACTTTTGATCCCGAGGGGAACCCTGTGGTTGGCATGC  
ACATACAAATGGACGAACGGATAAACCTTTTCACGCCCTTTTAAATATCCGTTATTCTAATAAACGCTCT  
TTTCTCTTAGGTTTACCCGCCAATATATCCTGTCAAACACTGATAGTTTAACTGAAGCGGGAAACGAC  
AATCTGATCCAAGCTCAAGCTAAGCTTGAGCTCTGCATGCCTGCAGGTCCCCAGATTAGCCTTTTCAATT  
TCAGAAAAGTATGCTAACCCACAGATGGTTAGAGAGGCTTACGCAGCAGGTCTCATCAAGACGATCTACCC  
GAGCAATAATCTCCAGGAAATCAAATACCTTCCCAAGAAGGTTAAAGATGCAGTCAAAAGATTGAGGACT  
AACTGCATCAAGAACACAGAGAAAGATATATTTCTCAAGATCAGAAGTACTATTCCAGTATGGACGATTC  
AAGGCTTGCTTCACAAACCAAGGCAAGTAATAGAGATTGGAGTCTCTAAAAAGGTAGTTCCCACTGAATC  
AAAGGCCATTGGAGTCAAAGATTCAAATAGAGGACCTAACAGAACTCGCCGTAAAGACTGGCGAACAGTTC  
ATACAGAGTCTCTTACGACTCAATGACAAGAAGAAAATCTTCGTCAACATGGTGGAGCACGACACACTTG  
TCTACTCCAAAAATATCAAAGATACAGTCTCAGAAGACCAAAGGGCAATTGAGACTTTTCAACAAAGGTT  
AATATCCGGAAACCTCCTCGGATTCCATTGCCAGCTATCTGTCACTTTATTGTGAAGATAGTGGAAAAG  
GAAGGTGGCTCCTACAAATGCCATCATTGCGATAAAGGAAAGGCCATCGTTGAAGATGCCTCTGCCGACA  
GTGGTCCCAAGATGGACCCCCACCCACGAGGAGCATCGTGAAAAAGAAGACGTTCCAACCACGTCTTC  
AAAGCAAGTGGAATTGATGTGATATCTCCACTGACGTAAGGGATGACGCACAATCCCACTATCCTTCGCAA  
GACCTTCTCTATATAAGGAAGTTCATTTTCAATTTGGAGAGAACACGGGGGACTCTAGAGGATCCAAGGA  
GATATAAGCCGCCACCATGGATTACAAGGACGATGATGACAAGGACTACAAGGACGATGACGATAAGGAC  
TATAAGGATGACGATGACAAGGATTACGCCGAGGTGATGGACGACGAAACAAAGAAATTGAAGAACAAAA  
ACAAGGAAACGAAAGAAGGCGACGAAGTTGTTGCTGCTGAGTCTTCTTTTCGGTTCCGTAAACTTACACAT  
CGATCCGACTCTGATAACGATGAACGATGTGCGTCAGTTGAGTACTCAACAGAATGCTGCTTTGAACAGG  
GACTTATTTCTTGCTCTGAAAGGGAAGTATCCTAACTTGCTGACAAAGATAAGGACTTTCACATAGCTA  
TGATGTTATACCGATTAGCGGTTAAGAGTTCATCATTGCAAAGTGATGATGACACCACGGGCATAACGTA  
CACTCGGAGGGTGTGGAAGTAGATTTGTCTGACAACTTTGGACCGACATCGTGTATAATTCTAAGGGT  
ATTGGTAACCGAACTAACGCCCTTCGAGTCTGGGGTAGAACTAACGATGCTCTTTACTTAGCCTTTTGTA  
GACAGAACCGCAATTTGAGTTATGGCGGACGTCCGCTAGATGCAGGGATTCCGGCTGGGTATCATTATTT  
GTGTGCAGATTTCTTGACCGGAGCTGGCTTGACTGATTTAGAATGTGCTGTGTACATACAAGCTAAAGAA  
CAATTGTTGAAAAAGCGAGGGGCTGATGAGGTTGTAGTTACTAATGTCAGGCAGCTTGGGAAATTTAACA  
CACGTTAACTCTTCCCTAATGATATCCCGCGGCCATGCTAGAGTCCGCAAAAATCACCAGTCTCTCTCT  
ACAAATCTATCTCTCTCTATTTTTCTCCAGAATAATGTGTGAGTAGTTCCAGATAAGGGAATTAGGGTT  
CTTATAGGGTTTCGCTCATGTGTTGAGCATATAAGAAACCCCTAGTATGTATTTGTATTTGTAAAATACT  
TCTATCAATAAAATTTCTAATTCCTAAAACCAAATCCAGTGACCTGCAGGCATGCGACGTCG

### Sequence of pH7LIC3.1.1-N4p20 (35S-N4p20)

GGGTACCCTCGAATTATCATACATGAGAATTAAGGGAGTCACGTTATGACCCCGCCGATGACGCGGGACA  
AGCCGTTTTACGTTTGGAAGTACAGAACCGCAACGTTGAAGGAGCCACTGAGCCGCGGTTTCTGGAGT  
TTAATGAGCTAAGCACATACGTGAGAAACCATTTATGCGCGTTCAAAGTCGCCTAAGGTCATATCAGC  
TAGCAAAATATTTCTGTCAAAAATGCTCCACTGACGTTCCATAAATCCCCCTCGGTATCCAATTAGAGTC  
TCATATTTCACTCTCAACTCGAATCCCCCTATGAAAAAGCCTGAACTCACCGCGACGTCTGTGAGAAGT  
TTCTGATCGAAAAAGTTCGACAGCGTCTCCGACCTGATGCAGCTCTCGGAGGGCGAAGAATCTCGTGCTTT  
CAGCTTCGATGTAGGAGGGCGTGATATGTCTGCGGGTAAATAGCTGCGCCGATGGTTTCTACAAAGAT  
CGTTATGTTTATCGGCACTTTGCATCGGCCGCGCTCCCGATTCCGGAAGTGCTTGACATTGGGGAGTTCA  
GCGAGAGCCTGACCTATTGCATCTCCGCGCGTGACAGGGTGTCACGTTGCAAGACCTGCCTGAAACCGA

ACTGCCCGCTGTTCTTCAGCCGGTCGCGGAGGCTATGGATGCTATCGCTGCGGCCGATCTTAGCCAGACG  
AGCGGGTTCGGCCCATTTCGGACCGCAAGGAATCGGTCAATACACTACATGGCGTGATTTTCATATGCGCGA  
TTGCTGATCCCCATGTGTATCACTGGCAAACGTGTGATGGACGACACCGTCAGTGCGTCCGTCGCGCAGGC  
TCTCGATGAGCTGATGCTTTGGGCGAGGACTGCCCCGAAGTCCGGCACTCGTGACGCGGATTTCGGCTCC  
AACAAATGTCTGACGGACAATGGCCGCATAACAGCGGTCAATTGACTGGAGCGAGGCGATGTTTCGGGGATT  
CCCAATACGAGGTCGCCAACATCTTCTTCTGGAGGCCGTGGTTGGCTTGATGGAGCAGCAGACGCGCTA  
CTTCGAGCGGAGGCATCCGGAGCTTGCAGGATCGCCAAGGCTCCGGGCGTATATGCTCCGCATTGGTCTT  
GACCAACTCTATCAGAGCTTGGTTGACGGCAATTTTCGATGATGCAGCTTGGGCGCAGGGTCGATGCGACG  
CAATCGTCCGATCCGGAGCCGGGACTGTCTGGGCGTACACAAATCGCCCGCAGAAGCGCGGCCGTCTGGAC  
CGATGGCTGTGTAGAAGTACTCGCCGATAGTGAAACCGACGCCCCAGCACTCGTCCGAGGGCAAAGGAA  
TAGAGTAGATGCCGACCGAACAAGAGCTGATTTTCGAGAACGCCTCAGCCAGCAACTCGCGCGAGCCTAGC  
AAGGCAAATGCGAGAGAACGGCCTTACGCTTGGTGGCACAGTTCTCGTCCACAGTTCGCTAAGCTCGCTC  
GGCTGGGTTCGCGGAGGGCCGGTTCGAGTGATTTCAGGAATTAATTCCTTAGAGTCAAGCAGATCGTTCAA  
ACATTTGGCAATAAAGTTTCTTAAGATTGAATCCTGTTGCCGGTCTTGCGATGATTATCATATAATTTCT  
GTTGAATTACGTTAAGCATGTAATAATTAACATGTAATGCATGACGTTATTTATGAGATGGGTTTTTATG  
ATTAGAGTCCCGCAATTATACATTTAATACGCGATAGAAAACAAAATATAGCGCGCAAACCTAGGATAAAT  
TATCGCGCGCGGTGTATCTATGTTACTAGATCGACCGCATGCAAGCTGATAATTCAATTTCGGCGTTAA  
TTCAGTACATTAAAAACGTCCGCAATGTGTTATTAAGTTGTCTAAGCGTCAATTTGTTTACACCACAATA  
TATCCTGCCACCAGCCAGCCAACAGCTCCCCGACCGGCAGCTCGGCACAAAATCACCCTCGATACAGGC  
AGCCCATCAGTCCGGGACGGCGTCAGCGGGAGAGCCGTTGTAAGGCGGCAGACTTTGCTCATGTTACCGA  
TGCTATTTCGAAGAACGGCAACTAAGCTGCCGGGTTTGAACACGGATGATCTCGCGGAGGGTAGCATGT  
TGATTGTAACGATGACAGAGCGTTGCTGCCTGTGATCAATTTCGGGCACGAACCCAGTGACATAAGCCTC  
GTTCCGTTTCGTAAGCTGTAATGCAAGTAGCGTAACCTGCCGTACGCAACTGGTCCAGAACCTTGACCGAA  
CGCAGCGGTGGTAACGGCGCAGTGGCGGTTTTTCATGGCTTCTTGTTATGACATGTTTTTTTTGGGGTACAG  
TCTATGCCTCGGGCATCCAAGCAGCAAGCGGTTACGCCGTGGGTTCGATGTTTGATGTTATGGAGCAGCA  
ACGATGTTACGCAGCAGGGCAGTCGCCCTAAAACAAAGTTAAACATCATGGGGGAAGCGGTGATCGCCGA  
AGTATCGACTCAACTATCAGAGGTAGTTGGCGTCATCGAGCGCCATCTCGAACCGACGTTGCTGGCCGTA  
CATTTGTACGGCTCCGCACTGGATGGCGGCCTGAAGCCACACAGTGATATTGATTTGCTGGTTACGGTGA  
CCGTAAGGCTTGATGAAACAACGCGGCAGCTTTGATCAACGACCTTTTGAAACTTCGGCTTCCCCTGG  
AGAGAGCGAGATTCTCCGCGCTGTAGAAGTCACCATTTGTTGTGCACGACGACATCATTCGCTGGCGTTAT  
CCAGCTAAGCGCGAACTGCAATTTGGAGAATGGCAGCGCAATGACATTTCTGCAGGTATCTTCGAGCCAG  
CCACGATCGACATTGATCTGGCTATCTTGCTGACAAAAGCAAGAGAACATAGCGTTGCCTTGGTAGGTCC  
AGCGGCGGAGGAACTCTTTGATCCGTTCTTGAACAGGATCTATTTGAGGCGCTAAATGAAACCTTAACG  
CTATGGAACCTCGCCGCCGACTGGGCTGGCGATGAGCGAAATGTAGTGCTTACGTTGTCCCGCATTTGGT  
ACAGCGCAGTAACCGGCAAAAATCGCGCCGAAGGATGTCGCTGCCGACTGGGCAATGGAGCGCCTGCCGGC  
CCAGTATCAGCCCGTCATACTTGAAGCTAGACAGGCTTATCTTGACAGAAGAAGATCGCTTGGCCTCG  
CGCGCAGATCAGTTGGAAGAATTTGTCCACTACGTGAAAGCGGAGATCACCAGGTAGTCGGCAAATAAT  
GTCTAGCTAGAAATTCGTTCAAGCCGACGCCGCTTCGCCGGCGTTAACTCAAGCGATTAGATGCACTAAG  
CACATAATTGCTCACAGCCAACTATCAGGTCAAGTCTGCTTTTATTATTTTAAAGCGTGACATAATAAGC  
CCTACACAAATTGGGAGATATATCATGCATGACCAAAATCCCTTAACGTGAGTTTTTCGTTCCACTGAGCG  
TCAGACCCCGTAGAAAAGATCAAAGGATCTTCTTGAGATCCTTTTTTTCTGCGCGTAATCTGCTGCTTGC  
AAACAAAAAACCACCGCTACCAGCGGTGGTTTGTGTTGCCGGATCAAGAGCTACCAACTCTTTTTCCGAA  
GGTAACTGGCTTCAGCAGAGCGCAGATACCAAATACTGTCTTCTAGTGTAGCCGTAGTTAGGCCACCAC  
TTCAAGAACTCTGTAGCACCGCTACATACCTCGCTCTGCTAATCCTGTTACCAGTGGCTGCTGCCAGTG



GCGATAAGTCGTGTCTTACCGGGTTGGACTCAAGACGATAGTTACCGGATAAGGCGCAGCGGTTCGGGCTG  
AACGGGGGGTTTCGTGCACACAGCCCAGCTTGGAGCGAACGACCTACACCGAACTGAGATACCTACAGCGT  
GAGCTATGAGAAAGCGCCACGCTTCCCCGAAGGGAGAAAGGCGGACAGGTATCCGGTAAGCGGCAGGGTCG  
GAACAGGAGAGCGCACGAGGGAGCTTCCAGGGGGAACGCCTGGTATCTTTATAGTCCTGTCGGGTTTCG  
CCACCTCTGACTTGAGCGTCGATTTTTGTGATGCTCGTCAGGGGGCGGAGCCTATGGAAAAACGCCAGC  
AACGCGGCCTTTTTACGGTTCTTGCCCTTTTGCTGGCCTTTTGCTCACATGTTCTTTCTGCGTTATCCC  
CTGATTCTGTGGATAACCGTATTACCGCCTTTGAGTGAGCTGATACCGCTCGCCGCAGCCGAACGACCGA  
GCGCAGCGAGTCAGTGAGCGAGGAAGCGGAAGAGCGCCTGATGCGGTATTTTCTCCTTACGCATCTGTGC  
GGTATTTACACCCGCATATGGTGCACTCTCAGTACAATCTGCTCTGATGCCGCATAGTTAAGCCAGTATA  
CACTCCGCTATCGCTACGTGACTGGGTGATGGCTGCGCCCCGACACCCGCCAACACCCGCTGACGCGCCC  
TGACGGGCTTGTCTGCTCCCGGCATCCGCTTACAGACAAGCTGTGACCGTCTCCGGGAGCTGCATGTGTC  
AGAGGTTTTACCGTCACTACCGAAACGCGCGAGGCAGGGTGCCTTGATGTGGGCGCCGGCGGTTCGAGTG  
GCGACGGCGCGGCTTGTCCGCGCCCTGGTAGATTGCCTGGCCGTAGGCCAGCCATTTTTGAGCGGCCAGC  
GGCCGCGATAGGCCGACGCGAAGCGCGGGGCGTAGGGAGCGCAGCGACCGAAGGGTAGGCGCTTTTTGC  
AGCTCTTCGGCTGTGCGCTGGCCAGACAGTTATGCACAGGCCAGGCGGGTTTTAAGAGTTTTAATAAGTT  
TTAAAGAGTTTTAGGCGGAAAAATCGCCTTTTTTCTCTTTTATATCAGTCACTTACATGTGTGACCGGTT  
CCCAATGTACGGCTTTGGGTTCCCAATGTACGGGTTCCGCTTCCCAATGTACGGCTTTGGGTTCCCAATG  
TACGTGCTATCCACAGGAAAGAGACCTTTTCGACCTTTTCCCCTGCTAGGGCAATTTGCCCTAGCATCT  
GCTCCGTACATTAGGAACCGGCGGATGCTTCGCCCTCGATCAGGTTGCGGTAGCGCATGACTAGGATCGG  
GCCAGCCTGCCCCGCTCCTCCTTCAAATCGTACTCCGGCAGGTCAATTTGACCCGATCAGCTTGCGCACG  
GTGAAACAGAACTTCTTGAACCTCTCCGGCGCTGCCACTGCGTTCTGTAGATCGTCTTGAACAACCATCTGG  
CTTCTGCCTTGCTGCGGCGCGGCGTGCCAGGCGGTAGAGAAAACGGCCGATGCCGGGATCGATCAAAAA  
GTAATCGGGGTGAACCGTCAGCACGTCCGGGTCTTGCCTTCTGTGATCTCGCGGTACATCCAATCAGCT  
AGCTCGATCTCGATGTACTCCGGCCGCCGGTTTTCGCTCTTTACGATCTTGTAGCGGCTAATCAAGGCTT  
CACCTTCGGATACCGTCACCAGGCGGCCGTTCTTGCCCTTCTTCGTACGCTGCATGGCAACGTGCGTGGT  
GTTTAACCGAATGCAGGTTTCTACCAGGTGCTCTTTCTGCTTTCCGCCATCGGCTCGCCGGCAGAACTTG  
AGTACGTCCGCAACGTGTGGACGGAACACGCGGCCGGGCTTGTCTCCCTTCCCTTCCCGGTATCGGTTCA  
TGGATTTCGGTTAGATGGGAAACCGCCATCAGTACCAGGTCGTAATCCCACACACTGGCCATGCCGGCCGG  
CCCTGCGGAAACCTCTACGTGCCCCTGCTGGAAGCTCGTAGCGGATCACCTCGCCAGCTCGTCGGTCACGC  
TTCGACAGACGGAACCGGCCACGTCCATGATGCTGCGACTATCGCGGGTGCCACGTATAGAGCATCG  
GAACGAAAAAATCTGGTTGCTCGTCGCCCTTGGGCGGCTTCCTAATCGACGGCGCACCGGCTGCCGGCGG  
TTGCCGGGATTCTTTGCGGATTCGATCAGCGGCCGCTTGCCACGATTACCGGGGCGTGCTTCTGCCTCG  
ATGCGTTGCCGCTGGGCGGCTGCGCGGCTTCAACTTCTCCACCAGGTCATACCCAGCGCCGCGCCGA  
TTTGTACCGGGCCGGATGGTTTTCGACCGCTCACGCCGATTCCTCGGGCTTGGGGGTTCCAGTGCCATTGC  
AGGGCCGGCAGACAACCCAGCCGCTTACGCCTGGCCAACCGCCGTTCTCCACACATGGGGCATTCCAC  
GGCGTCGGTGCTGGTTGTCTTGATTTTCCATGCCGCTCCTTTAGCCGCTAAAATTCATCTACTCATT  
TATTCAATTTGCTCATTTACTCTGGTAGCTGCGCGATGTATTCAGATAGCAGCTCGGTAATGGTCTTGCCCT  
TGGCGTACCGGTACATCTTACGCTTGGTGTGATCTCCGCCGGCAACTGAAAGTTGACCCGCTTCATGG  
CTGGCGTGTCTGCCAGGCTGGCCAACGTTGCAGCCTTGCTGCTGCGTGCGCTCGGACGGCCGGCAGCTTAG  
CGTGTTTGTGCTTTTGCTCATTTTCTCTTTACCTCATTAACCTCAAATGAGTTTTGATTTAATTTACGCGG  
CCAGCGCTTGACCTCGCGGGCAGCGTCGCCCTCGGGTTCTGATTCAAGAACGGTTGTGCCGGCGGGCGG  
AGTGCCCTGGGTAGCTCACGCGCTGCGTGATACGGGACTCAAGAATGGGCAGCTCGTACCCGGCCAGCGCC  
TCGGCAACCTCACCGCCGATGCGCGTGCTTTGATCGCCCGGACACGACAAAGGCCGCTTGTAGCCTTC  
CATCCGTGACCTCAATGCGCTGCTTAACCAGCTCCACCAGGTCGGCGGTGGCCCATATGTCGTAAGGGCT

TGGCTGCACCGGAATCAGCACGAAGTCGGCTGCCTTGATCGCGGACACAGCCAAGTCCGCCGCCTGGGGC  
GCTCCGTCGATCACTACGAAGTCGCGCCGGCCGATGGCCTTCACGTCGCGGTCAATCGTCGGGCGGTCTGA  
TGCCGACAACGGTTAGCGGTTGATCTTCCCGCACGGCCGCCAATCGCGGGCACTGCCCTGGGGATCGGA  
ATCGACTAACAGAACATCGGCCCCGGCGAGTTGCAGGGCGCGGGCTAGATGGGTTGCGATGGTCGTCTTG  
CCTGACCCGCCTTTCTGGTTAAGTACAGCGATAACCTTCATGCGTTCCCCTTGCGTATTTGTTTATTAC  
TCATCGCATCATATACGCAGCGACCGCATGACGCAAGCTGTTTTACTCAAATACACATCACCTTTTTAGA  
CGGCGGCGCTCGGTTTCTTCAGCGGCCAAGCTGGCCGGCCAGGCCGCCAGCTTGGCATCAGACAAACCGG  
CCAGGATTTTCATGCAGCCGCACGGTTGAGACGTGCGCGGGCGGCTCGAACACGTACCCGGCCGCGATCAT  
CTCCGCCTCGATCTCTTCGGTAATGAAAAACGGTTTCGTCTGGCCGTCCTGGTGCGGTTTCATGCTTGTT  
CCTCTTGCGGTTTCATTCTCGGCGGCCGCCAGGGCGTCGGCTCGGTCAATGCGTCCTCACGGAAGGCACC  
GCGCCGCTGGCCTCGGTGGGCGTCACTTCCTCGCTGCGCTCAAGTGC CGGTACAGGGTCGAGCGATGC  
ACGCCAAGCAGTGCAGCCGCTCTTTCACGGTGCGGCCTTCCTGGTCGATCAGCTCGCGGGCGTGCGGA  
TCTGTGCCGGGTGAGGGTAGGGCGGGGCCAAACTTCACGCCTCGGGCCTTGGCGGCCTCGCGCCCGCT  
CCGGGTGCGGTGATGATTAGGGAACGCTCGAACTCGGCAATGCCGGCGAACACGGTCAACACCATGCGG  
CCGGCCGGCGTGGTGGTGTCGGCCCACGGCTCTGCCAGGCTACGCAGGCCCGCGCCGGCCTCCTGGATGC  
GCTCGGCAATGTCCAGTAGGTGCGGGTGCTGCGGGCCAGGCGGTCTAGCCTGGTCACTGTCACAACGTC  
GCCAGGGCGTAGGTGGTCAAGCATCCTGGCCAGCTCCGGCGGTGCGGCCTGGTGCCGGTGATCTTCTCG  
GAAAACAGCTTGGTGACGCCGGCCGCGTGACGTTGCGCCCGTTGGTTGGTCAAGTCTGGTCGTGCGGTGC  
TGACGCGGGCATAGCCCAGCAGGCCAGCGGCGGCGCTCTTGTTTCATGGCGTAATGTCTCCGGTTCTAGTC  
GCAAGTATTCTACTTTATGCGACTAAAACACGCGACAAGAAAACGCCAGGAAAAGGGCAGGGCGGCAGCC  
TGTCGCGTAACCTTAGGACTTGTGCGACATGTGTTTTGAGAAGACGGCTGCACTGAACGTGAGAAGCCGA  
CTGCACTATAGCAGCGAGGGGTTGGATCAAAGTACTTTGATCCCAGGGGAACCCTGTGGTTGGCATGC  
ACATACAAATGGACGAACGGATAAACCTTTTCACGCCCTTTTAAATATCCGTTATTCTAATAAACGCTCT  
TTTCTCTTAGGTTTACCCGCCAATATATCTGTCAAACACTGATAGTTTAAACTGAAGGCGGGAAACGAC  
AATCTGATCCAAGCTCAAGCTAAGCTTGAGCTCTGCATGCCTGCAGGTCCCCAGATTAGCCTTTTCAATT  
TCAGAAAGAATGCTAACCACAGATGGTTAGAGAGGCTTACGCAGCAGGTCTCATCAAGACGATCTACCC  
GAGCAATAATCTCCAGGAAATCAAATACCTTCCCAAGAAGGTTAAAGATGCAGTCAAAAGATTTCAGGACT  
AACTGCATCAAGAACACAGAGAAAGATATATTTCTCAAGATCAGAAGTACTATTCCAGTATGGACGATTC  
AAGGCTTGCTTCACAAACCAAGGCAAGTAATAGAGATTGGAGTCTCTAAAAAGGTAGTCCCCTGAATC  
AAAGGCCATGGAGTCAAAGATTCAAATAGAGGACCTAACAGAACTCGCCGTAAAGACTGGCGAACAGTTC  
ATACAGAGTCTCTTACGACTCAATGACAAGAAGAAAATCTTCGTCAACATGGTGAGACGACACACTTG  
TCTACTCCAAAAATATCAAAGATACAGTCTCAGAAGACCAAAGGGCAATTGAGACTTTTCAACAAAGGT  
AATATCCGGAAACCTCCTCGGATTCCATTGCCCAGCTATCTGTCACTTTATTGTGAAGATAGTGGAAAAG  
GAAGGTGGCTCCTACAAATGCCATCATTGCGATAAAGGAAAGGCCATCGTTGAAGATGCCTCTGCCGACA  
GTGGTCCCAAAGATGGACCCCCACCCACGAGGAGCATCGTGAAAAAGAAGACGTTCCAACCACGTCTTC  
AAAGCAAGTGGATTGATGTGATATCTCCACTGACGTAAGGGATGACGCACAATCCCCTATCCTTCGCAA  
GACCTTCTCTATATAAGGAAGTTCATTTTCATTTGGAGAGAACACGGGGGACTCTAGAGGATCCAAGGA  
GATATAAGCCGCCACCATGGATTACAAGGACGATGATGACAAGGACTACAAGGACGATGACGATAAGGAC  
TATAAGGATGACGATGACAAGGATTACGCCGAGGTCATGCGAGCTTACTTTAGTGTTAACGATTACATAA  
GCCTTTTGGCTAAGGTTGGTTGAGTTGTGGAACGTTTGTGCGATCCCAGCGTAACCTCTCACGGAAGTGAT  
GGACGAAATTAATGATTTTAACTCGTTTCTCGCTTTGGTGCACTCTATGAAGTCGGACATGAACGGCGAT  
CATCAGGATGGTCACCATGAGATGGGTGAACATAAATCTCGGTTGTTGTGCAATATAGAGGCGAACTGC  
GAGTGCTTCTCGACATCATAAGACGTCGGTTTACTCGCGAAAACTGCTCTGTACCAGTGCTACAGATGT  
TGTGGGCTTCTTCGTGCTGAGGTACATGAGTTCTAGTCACACTAGTTTCGAAACCGTAATGCGAACGGAA

CTGAAGTTGGTGGTTAAAGCTGTGCTGTCGGAATTGTCCCGCACGCATAAACTAGATTTTAGCGAGCGAG  
CCTTTACGGCTTACGGTATCCTTTTGCAGAAGGGCACCGTGGCAACCGTTTGCGGTCAGTTTGACATTAA  
TTTAGTTTCTCCGTCTTGCGTGTGACCTCTTCCCTAATGATATCCCGCGGCCATGCTAGAGTCCGCAAAA  
ATCACCAGTCTCTCTCTACAAATCTATCTCTCTATTTTTCTCCAGAATAATGTGTGAGTAGTTCACAG  
ATAAGGAATTAGGGTTCTTATAGGGTTTCGCTCATGTGTTGAGCATATAAGAAACCCTTAGTATGTATT  
TGTATTTGTAAAATACTTCTATCAATAAAAATTTCTAATTCTTAAACCAAAATCCAGTGACCTGCAGGCA  
TGCGACGTCG

### Sequence of pH7LIC3.1.1-N4p23 (35S-N4p23)

GGGTACCTCGAATTATCATACATGAGAATTAAGGGAGTCACGTTATGACCCCGCCGATGACGCGGGACA  
AGCCGTTTTACGTTTGAACTGACAGAACCGCAACGTTGAAGGAGCCACTGAGCCGCGGGTTTCTGGAGT  
TTAATGAGCTAAGCACATACGTCAGAAACCATTATTGCGCGTTCAAAAGTCGCCTAAGGTCACATCAGC  
TAGCAAATATTTCTTGTCAAAAATGCTCCACTGACGTTCCATAAATTCCCCTCGGTATCCAATTAGAGTC  
TCATATTCACCTCTCAACTCGAATCCCCCTATGAAAAAGCCTGAACTCACCGCGACGTCTGTCGAGAAGT  
TTCTGATCGAAAAGTTCGACAGCGTCTCCGACCTGATGCAGCTCTCGGAGGGCGAAGAATCTCGTGCTTT  
CAGCTTCGATGTAGGAGGGCGTGGATATGTCTGCGGGTAAATAGCTGCGCCGATGGTTTCTACAAAGAT  
CGTTATGTTTATCGGCACTTTGCATCGGCCGCGCTCCCGATTCCGGAAGTGCTTGACATTGGGGAGTTCA  
GCGAGAGCCTGACCTATTGCATCTCCCGCCGTGCACAGGGTGTACGTTGCAAGACCTGCCTGAAACCGA  
ACTGCCCCTGTTCTTCAGCCGGTCGCGGAGGCTATGGATGCTATCGCTGCGGCCGATCTTAGCCAGACG  
AGCGGGTTCGGCCCATTCGGACCGCAAGGAATCGGTCAATACACTACATGGCGTGATTTTCATATGCGCGA  
TTGCTGATCCCCATGTGTATCACTGGCAAACGTGTATGGACGACACCGTCAGTGCGTCCGTCGCGCAGGC  
TCTCGATGAGCTGATGCTTTGGGCGAGGACTGCCCCGAAGTCCGGCACTCGTGACGCGGATTCGGCTCC  
AACAAATGTCCTGACGGACAATGGCCGCATAACAGCGGTCATTGACTGGAGCGAGGCGATGTTCCGGGATT  
CCCAATACGAGGTCGCCAACATCTTCTTCTGGAGGCCGTGGTTGGCTTGATGGAGCAGCAGACGCGCTA  
CTTCGAGCGGAGGCATCCGGAGCTTGCAGGATCGCCAAGGCTCCGGGCGTATATGCTCCGCATTGGTCTT  
GACCAACTCTATCAGAGCTTGGTTGACGGCAATTTTCGATGATGCAGCTTGGGCGCAGGGTCGATGCGACG  
CAATCGTCCGATCCGGAGCCGGGACTGTGCGGCGTACACAAATCGCCCGCAGAAGCGCGGCCGTCTGGAC  
CGATGGCTGTGTAGAAGTACTCGCCGATAGTGAAACCGACGCCCCAGCACTCGTCCGAGGGCAAAGGAA  
TAGAGTAGATGCCGACCGAACAAGAGCTGATTTTCGAGAACGCCTCAGCCAGCAACTCGCGCGAGCCTAGC  
AAGGCAAAATGCGAGAGAACGGCCTTACGCTTGGTGGCACAGTTCTCGTCCACAGTTCGCTAAGCTCGCTC  
GGCTGGGTGCGGGGAGGGCCGGTCGAGTGATTACAGGAATTAATTCCTAGAGTCAAGCAGATCGTTCAA  
ACATTTGGCAATAAAGTTTCTTAAGATTGAATCCTGTTGCCGGTCTTGCGATGATTATCATATAATTTCT  
GTTGAATTACGTTAAGCATGTAATAATTAACATGTAATGCATGACGTTATTTATGAGATGGGTTTTTATG  
ATTAGAGTCCCGCAATTATACATTTAATACGCGATAGAAAACAAAATATAGCGCGCAAACTAGGATAAAT  
TATCGCGCGCGGTGTCATCTATGTTACTAGATCGACCGCATGCAAGCTGATAATTCAATTCGGCGTTAA  
TTCAGTACATTAAAAACGTCCGCAATGTGTTATTAAGTTGTCTAAGCGTCAATTTGTTTACACCACAATA  
TATCCTGCCACCAGCCAGCCAACAGTCCCCGACCGGCAGCTCGGCACAAAATCACCACCTCGATACAGGC  
AGCCCATCAGTCCGGGACGGCGTCAGCGGGAGAGCCGTTGTAAGGCGGCAGACTTGCTCATGTTACCGA  
TGCTATTCCGAAGAACGGCAACTAAGCTGCCGGGTTTGAAACACGGATGATCTCGCGGAGGGTAGCATGT  
TGATTGTAACGATGACAGAGCGTTGCTGCCTGTGATCAATTCCGGGCACGAACCCAGTGGACATAAGCCTC  
GTTCCGTTTCGTAAGCTGTAATGCAAGTAGCGTAACTGCCGTACGCAACTGGTCCAGAACCCTTGACCGAA  
CGCAGCGGTGGTAACGGCGCAGTGGCGGTTTTTCATGGCTTCTTGTTATGACATGTTTTTTTTGGGGTACAG  
TCTATGCCTCGGGCATCCAAGCAGCAAGCGGTTACGCCGTGGGTGATGTTTGATGTTATGGAGCAGCA  
ACGATGTTACGCAGCAGGGCAGTCGCCCTAAAACAAAGTTAAACATCATGGGGGAAGCGGTGATCGCCGA

AGTATCGACTCAACTATCAGAGGTAGTTGGCGTCATCGAGCGCCATCTCGAACCGACGTTGCTGGCCGTA  
CATTTGTACGGCTCCGCAGTGGATGGCGGCCTGAAGCCACACAGTGATATTGATTTGCTGGTTACGGTGA  
CCGTAAGGCTTGATGAAACAACGCGGCGAGCTTTGATCAACGACCTTTTGAAACTTCGGCTTCCCCTGG  
AGAGAGCGAGATTCTCCGCGCTGTAGAAGTCACCATTGTTGTGTCACGACGACATCATCCGTGGCGTTAT  
CCAGCTAAGCGGAACTGCAATTTGGAGAATGGCAGCGCAATGACATTCTTGCAGGTATCTTCGAGCCAG  
CCACGATCGACATTGATCTGGCTATCTTGTCTGACAAAAGCAAGAGAACATAGCGTTGCCCTTGGTAGGTCC  
AGCGGCGGAGGAACCTTTGATCCGGTTCCTGAACAGGATCTATTTGAGGCGCTAAATGAAACCTTAACG  
CTATGGAACCTCGCCGCCGACTGGGCTGGCGATGAGCGAAATGTAGTGCTTACGTTGTCCCGCATTTGGT  
ACAGCGCAGTAACCGGCAAAATCGCGCCGAAGGATGTCGCTGCCGACTGGGCAATGGAGCGCCTGCCGGC  
CCAGTATCAGCCCGTCATACTTGAAGCTAGACAGGCTTATCTTGGACAAGAAGAAGATCGCTTGGCCTCG  
CGCGCAGATCAGTTGGAAGAATTTGTCCACTACGTGAAAGGCGAGATCACCAAGGTAGTCGGCAAATAAT  
GTCTAGCTAGAAATTCGTTCAAGCCGACGCCGCTTCGCCGGCGTTAACTCAAGCGATTAGATGCACTAAG  
CACATAATTGCTCACAGCCAACTATCAGGTCAAGTCTGCTTTTATTATTTTAAAGCGTGATAATAAGC  
CCTACACAAATTGGGAGATATATCATGCATGACCAAAATCCCTTAACGTGAGTTTTCTGTTCCACTGAGCG  
TCAGACCCCGTAGAAAAGATCAAAGGATCTTCTTGAGATCCTTTTTTTCTGCGCGTAATCTGCTGCTTGC  
AAACAAAAAACCACCGCTACCAGCGGTGGTTTGTGGCCGGATCAAGAGCTACCAACTCTTTTCCGAA  
GGTAACTGGCTTCAGCAGAGCGCAGATACCAAATACTGTCTTCTAGTGTAGCCGTAGTTAGGCCACCAC  
TTCAAGAACTCTGTAGCACCAGCTACATACCTCGCTCTGCTAATCCTGTTACCAGTGGCTGCTGCCAGTG  
GCGATAAGTCGTGTCTTACCGGGTTGGACTCAAGACGATAGTTACCGGATAAGGCGCAGCGGTCCGGCTG  
AACGGGGGGTTTCGTGCACACAGCCCAGCTTGGAGCGAACGACCTACACCGAACTGAGATACCTACAGCGT  
GAGCTATGAGAAAGCGCCACGCTTCCCGAAGGGAGAAAGGCGGACAGGTATCCGGTAAGCGGCAGGGTCG  
GAACAGGAGAGCGCACGAGGGAGCTTCCAGGGGGAACGCCTGGTATCTTTATAGTCTGTCCGGTTTCG  
CCACCTCTGACTTGAGCGTCGATTTTTGTGATGCTCGTCAGGGGGCGGAGCCTATGAAAAACGCCAGC  
AACGCGGCCTTTTTACGGTTCTTGGCCTTTTGCTGGCCTTTTGCTCACATGTTCTTTCTGCGTTATCCC  
CTGATTCTGTGGATAACCGTATTACCGCCTTTGAGTGAGCTGATACCGCTCGCCGCAGCCGAACGACCGA  
GCGCAGCGAGTCAGTGAGCGAGGAAGCGGAAGAGCGCCTGATGCGGTATTTTCTCCTTACGCATCTGTGC  
GGTATTTACACCCGCATATGGTGCACCTCTCAGTACAATCTGCTCTGATGCCGCATAGTTAAGCCAGTATA  
CACTCCGCTATCGCTACGTGACTGGGTGATGGCTGCGCCCCGACACCCGCCAACACCCGCTGACGCGCCC  
TGACGGGCTTGTCTGCTCCCGGCATCCGCTTACAGACAAGCTGTGACCGTCTCCGGGAGCTGCATGTGTC  
AGAGGTTTTACCGTCAATCACCGAAACGCGCGAGGCAGGGTGCCTTGATGTGGGCGCCGGCGGTGAGTG  
GCGACGGCGCGGCTTGTCGCGCCCTGGTAGATTGCCTGGCCGTAGGCCAGCCATTTTTGAGCGGCCAGC  
GGCCGCGATAGGCCGACGCGAAGCGCGGGGCGTAGGGAGCGCAGCGACCGAAGGGTAGGCGCTTTTTGC  
AGCTCTTCGGCTGTGCGCTGGCCAGACAGTTATGCACAGGCCAGGCGGGTTTTAAGAGTTTTAATAAGTT  
TTAAAGAGTTTTAGGCGGAAAAATCGCCTTTTTTCTCTTTATATCAGTCACTTACATGTGTGACCGGTT  
CCCAATGTACGGCTTTGGGTTCCCAATGTACGGGTTCCGTTCCCAATGTACGGCTTTGGGTTCCCAATG  
TACGTGCTATCCACAGGAAAGAGACCTTTTCGACCTTTTTCCCCTGCTAGGGCAATTTGCCCTAGCATCT  
GCTCCGTACATTAGGAACCGGCGGATGCTTCGCCCTCGATCAGGTTGCGGTAGCGCATGACTAGGATCGG  
GCCAGCTGCCCCGCCCTCCTCCTCAAATCGTACTCCGGCAGGTCAATTTGACCCGATCAGCTTGGCGACG  
GTGAAACAGAACTTCTTGAACCTCTCCGGCGCTGCCACTGCGTTCGTAGATCGTCTTGAACAACCATCTGG  
CTTCTGCCTTGCTGCGGCGCGGCGTGGCAGGCGGTAGAGAAAACGGCCGATGCCGGGATCGATCAAAAA  
GTAATCGGGGTGAACCGTCAGCACGTCCGGGTTCTTGCCTTCTGTGATCTCGCGGTACATCCAATCAGCT  
AGCTCGATCTCGATGTACTCCGGCCGCCGGTTTTCGCTCTTTACGATCTTGTAGCGGCTAATCAAGGCTT  
CACCTCGGATACCGTCACCGAGGCGGCCGTTCTTGGCCTTCTTCGTACGCTGCATGGCAACGTGCGTGGT  
GTTTAACCGAATGCAGGTTTCTACCAGGTCGTCTTCTGCTTTCCGCCATCGGCTCGCCGGCAGAACTTG

AGTACGTCCGCAACGTGTGGACGGAACACGCGGCCGGGCTTGTCTCCCTTCCCTTCCCGGTATCGGTTCA  
TGGATTTCGGTTAGATGGGAAACCGCCATCAGTACCAGGTCGTAATCCCACACACTGGCCATGCCGGCCGG  
CCCTGCGGAAACCTCTACGTGCCCCGTCTGGAAGCTCGTAGCGGATCACCTCGCCAGCTCGTCGGTCACGC  
TTCGACAGACGGAACCGGCCACGTCCATGATGCTGCGACTATCGCGGGTGCCACGTCATAGAGCATCG  
GAACGAAAAAATCTGGTTGCTCGTCGCCCTTGGGCGGCTTCCTAATCGACGGCGCACCGGCTGCCGGCGG  
TTGCCGGGATTCTTTGCGGATTGATCAGCGGCCGCTTGCCACGATTACCGGGGCGTGCTTCTGCCTCG  
ATGCGTTGCCGCTGGGCGGCTGCGCGGCCCTTCAACTTCTCCACCAGGTCATCACCCAGCGCCGCGCCGA  
TTTGTACCGGGCCGGATGGTTTTCGACCGTCACGCCGATTTCCTCGGGCTTGGGGGTTCCAGTGCCATTGC  
AGGGCCGGCAGACAACCCAGCCGCTTACGCCTGGCCAACCGCCCGTTTCCTCCACACATGGGGCATTCCAC  
GGCGTCGGTGCCCTGGTTGTTCTTGATTTTCCATGCCGCCTCCTTTAGCCGCTAAAATTCATCTACTCATT  
TATTCAATTGCTCATTTACTCTGGTAGCTGCGGATGTATTTCAGATAGCAGCTCGGTAATGGTCTTGCCCT  
TGGCGTACCGCGTACATCTTCAGCTTGGTGTGATCCTCCGCCGGCAACTGAAAGTTGACCCGCTTCATGG  
CTGGCGTGTCTGCCAGGCTGGCCAACGTTGCAGCCTTGCTGCTGCGTGCCTCGGACGGCCGGCACTTAG  
CGTGTTTGTGCTTTTGTCTATTTTCTCTTTACCTCATTAACCTCAAATGAGTTTTGATTTAATTTACGCGG  
CCAGCGCTGGACCTCGCGGGCAGCGTCGCCCTCGGGTCTTGATTCAAGAACGGTTGTGCCGGCGGCGGC  
AGTGCCCTGGGTAGCTCACGCGCTGCGTGATACGGGACTCAAGAATGGGCAGCTCGTACCCGGCCAGCGCC  
TCGGCAACCTCACCGCCGATGCGCGTGCCCTTTGATCGCCCGGACACGACAAAGCCGCTTGTAGCCTTC  
CATCCGTGACCTCAATGCGCTGCTTAACCAGCTCCACCAGGTGCGCGGTGGCCCATATGTCGTAAGGGCT  
TGGCTGCACCGGAATCAGCACGAAGTCGGCTGCCTTGATCGCGGACACAGCCAAGTCCGCCGCTGGGGC  
GCTCCGTGCGATCACTACGAAGTCGCGCCGGCCGATGGCCTTCACGTGCGGGTCAATCGTCGGGCGGTGCA  
TGCCGACAACGGTTAGCGGTTGATCTTCCCGCACGGCCGCCAATCGCGGGCACTGCCCTGGGGATCGGA  
ATCGACTAACAGAACATCGGCCCCGGCGAGTTGCAGGGCGCGGGCTAGATGGGTTGCGATGGTCTGCTTG  
CCTGACCCGCCTTTCTGGTTAAGTACAGCGATAACCTTCATGCGTTCCCTTGCGTATTTGTTTATTAC  
TCATCGCATCATATACGACGCGACCGCATGACGCAAGCTGTTTTACTCAAATACACATCACCTTTTTAGA  
CGGCGGCGCTCGGTTTCTTCAGCGGCCAAGCTGGCCGGCCAGGCCGCCAGCTTGGCATCAGACAAACCGG  
CCAGGATTTTCATGCAGCCGCACGGTTGAGACGTGCGCGGGCGGCTCGAACACGTACCCGGCCGCGATCAT  
CTCCGCCTCGATCTCTTCGGTAATGAAAAACGGTTTCGTCTTGCCGCTCCTGGTGCGTTTCATGCTTGTT  
CCTCTTGCGGTTTCATCTCGGCGGCCGCCAGGGCGTCGGCTCGGTCAATGCGTCTCACGGAAGGCACC  
GCGCCGCTGGCCTCGGTGGGCGTCACTTCCTCGCTGCGCTCAAGTGCGCGGTACAGGGTCGAGCGATGC  
ACGCCAAGCAGTGACGCCGCTCTTTACGGTGCGGCCCTTCCTGGTCGATCAGCTCGCGGGCGTGCGCGA  
TCTGTGCCGGGTGAGGGTAGGGCGGGGCCAAACTTCACGCCTCGGGCCTTGGCGGCCCTCGCGCCCGCT  
CCGGGTGCGGTCGATGATTAGGGAACGCTCGAACTCGGCAATGCCGGCGAACACGGTCAACACCATGCGG  
CCGGCCGGCGTGTTGGTGTCGGCCCCACGGCTCTGCCAGGCTACGCAGGCCCGCGCGGCCCTCCTGGATGC  
GCTCGGCAATGTCCAGTAGGTGCGGGTGCTGCGGGCCAGGCGGTCTAGCCTGGTCACTGTCAACAGTC  
GCCAGGGCGTAGGTGGTCAAGCATCCTGGCCAGCTCCGGGCGGTGCGGCCTGGTGCCGGTGATCTTCTCG  
GAAAACAGCTTGGTGACCCGGCCGCGTGACAGTTCGGCCCGTTGGTTGGTCAAGTCCTGGTCGTGCGTGC  
TGACGCGGGCATAGCCCAGCAGGCCAGCGCGGCGCTCTTGTTTCATGGCGTAATGTCTCCGGTTCTAGTC  
GCAAGTATTCTACTTTATGCGACTAAAACACGCGACAAGAAAACGCCAGGAAAAGGGCAGGGCGGCAGCC  
TGTCGCGTAACCTTAGGACTTGTGCGACATGTCGTTTTTCAAGACGGCTGCACTGAACGTGAGAAGCCGA  
CTGCACTATAGCAGCGGAGGGGTTGGATCAAAGTACTTTGATCCCAGGGGAACCTGTGGTTGGCATGC  
ACATACAAATGGACGAACGGATAAACCTTTTACGCCCTTTTAAATATCCGTTATTCTAATAAACGCTCT  
TTTCTCTTAGGTTTACCCGCCAATATATCCTGTCAAACACTGATAGTTTAAACTGAAGCGGGAAACGAC  
AATCTGATCCAAGCTCAAGCTAAGCTTGAGCTCTGCATGCCTGCAGGTCCCCAGATTAGCCTTTTCAATT  
TCAGAAAGAATGCTAACCCACAGATGGTTAGAGAGGCTTACGCAGCAGGTCTCATCAAGACGATCTACCC

GAGCAATAATCTCCAGGAAATCAAATACCTTCCCAAGAAGGTTAAAGATGCAGTCAAAAGATTGAGGACT  
AACTGCATCAAGAACACAGAGAAAGATATATTTCTCAAGATCAGAAGTACTATTCCAGTATGGACGATTC  
AAGGCTTGCTTCACAAACCAAGGCAAGTAATAGAGATTGGAGTCTCTAAAAAGGTAGTTCCCACTGAATC  
AAAGGCCATGGAGTCAAAGATTCAAATAGAGGACCTAACAGAACTCGCCGTAAAGACTGGCGAACAGTTT  
ATACAGAGTCTCTTACGACTCAATGACAAGAAGAAAATCTTCGTCAACATGGTGGAGCACGACACACTTG  
TCTACTCCAAAAATATCAAAGATACAGTCTCAGAAGACCAAAGGGCAATTGAGACTTTTCAACAAAGGT  
AATATCCGGAAACCTCCTCGGATTCCATTGCCCAGCTATCTGTCACTTTATTGTGAAGATAGTGGAAAAG  
GAAGGTGGCTCCTACAAATGCCATCATTGCGATAAAGGAAAGGCCATCGTTGAAGATGCCTCTGCCGACA  
GTGGTCCCAAAGATGGACCCCCACCCACGAGGAGCATCGTGAAAAAGAAGACGTTCCAACCACGTCTTC  
AAAGCAAGTGGATTGATGTGATATCTCCACTGACGTAAGGGATGACGCACAATCCCCTATCCTTCGCAA  
GACCTTCTCTATATAAGGAAGTTCATTTTCAATTTGGAGAGAACACGGGGGACTCTAGAGGATCCAAGGA  
GATATAAGCCGCCACCATGGATTACAAGGACGATGATGACAAGGACTACAAGGACGATGACGATAAGGAC  
TATAAGGATGACGATGACAAGGATTACGCCGAGGTGATGGATGATACTAGCGGACAACTTTTCGTTTCTG  
TGAACCTTTCTGACGAAAGCAACACGGCAAGCACTAAAGTTGAAAACGTAAAATCGGAAGCGGATCGCTT  
GGAGTTTTTACGTAAAATGAATCCCTTTATTGTTGACGCTCTGGTGCGGAAAACCAATTATCAGGGTGC  
CGTTTTTCGCGCAAGAATAATAGGAGTGTGCGTGGATTGTGGTAGAAAACACGACAAGGCGCTCAAGACTG  
AACGTAAGTGTAAAGTCAACAACACGCAATCTCAGAACGAGGTGGCGCATATGTTGATGCACGATCCCGT  
TAAGTATTTGAACAAAAAGAAAGGCTAGAGCCTTTTCTAACGCAGAGATGTTTGCGATTGAACTGGTTTCG  
TACACCAAGGAAAGGCAATTGGCGGTGATTTAGCCGCTGAAAGGGAGAAGACGAGACTGGCTCGTAGAC  
ACCCAATACGTTCTCCGGAAGAACTCCGGAACATTATAAAATTCGGTATGACTGCTAAGGCAATGTTACC  
GGACATCAACGCCGTAGACGTTGGTGATAACGAGGAACTTCGTGCGAGTACCCAGTGAGTCTGAGTGTT  
TCTGGCGGAGTTCTCCGTGAACACCACTTCATCTGACCTCTTCCCTAATGATATCCCGCGGCCATGCTAG  
AGTCCGCAAAAATCACCAGTCTCTCTACAAATCTATCTCTCTATTTTCTCCAGAATAATGTGTGA  
GTAGTTCCAGATAAGGGAATTAGGGTTCTTATAGGGTTTCGCTCATGTGTTGAGCATATAAGAAACCTT  
TAGTATGTATTTGTATTTGTAAAATACTTCTATCAATAAAATTTCTAATTCCTAAAACCAAAATCCAGTG  
ACCTGCAGGCATGCGACGTCG

### Sequence of pH7LIC3.1.1-p19 (35S-p19)

GGGTACCCTCGAATTATCATACATGAGAATTAAGGGAGTCACGTTATGACCCCGCCGATGACGCGGGACA  
AGCCGTTTTACGTTTGGAAGTACAGAACCGCAACGTTGAAGGAGCCACTGAGCCGCGGGTTTCTGGAGT  
TTAATGAGCTAAGCACATACGTCAGAAACCATTATTGCGCGTTCAAAAGTCGCCTAAGGTCACTATCAGC  
TAGCAAATATTTCTTGTCAAAAATGCTCCACTGACGTTCCATAAATTCCCCTCGGTATCCAATTAGAGTC  
TCATATTTACTCTCAACTCGAATCCCCCTATGAAAAAGCCTGAACTCACCGCGACGTCTGTGAGAAGT  
TTCTGATCGAAAAGTTGACAGCGTCTCCGACCTGATGCAGCTCTCGGAGGGCGAAGAAATCTCGTGCTTT  
CAGCTTCGATGTAGGAGGGCGTGGATATGTCCTGCGGGTAAATAGCTGCGCCGATGGTTTCTACAAAGAT  
CGTTATGTTTATCGGCACTTTGCATCGGCCGCGCTCCCGATTCCGGAAGTGCTTGACATTGGGGAGTTCA  
GCGAGAGCCTGACCTATTGCATCTCCGCGCGTGCACAGGGTGTACGTTGCAAGACCTGCCTGAAACCGA  
ACTGCCGCTGTTCTTCAGCCGCTGCGGAGGCTATGGATGCTATCGCTGCGGCCGATCTTAGCCAGACG  
AGCGGGTTCGGCCCATTCGGACCGCAAGGAATCGGTCAATACACTACATGGCGTGATTTATATGCGCGA  
TTGCTGATCCCCATGTGTATCACTGGCAAATGTGATGGACGACACCGTCAGTGCGTCCGTCGCGCAGGC  
TCTCGATGAGCTGATGCTTTGGGCGAGGACTGCCCCGAAGTCCGGCACTCGTGACGCGGATTCGGCTCC  
AACAATGTCTGACGGACAATGGCCGCATAACAGCGGTCAATTGACTGGAGCGAGGCGATGTTTCGGGGATT  
CCCAATACGAGGTGCCAACATCTTCTTCTGGAGGCCGTGGTTGGCTTGATGGAGCAGCAGACGCGCTA  
CTTCGAGCGGAGGCATCCGGAGCTTGCAGGATCGCCAAGGCTCCGGGCGTATATGCTCCGCAATTGGTCTT

GACCAACTCTATCAGAGCTTGGTTGACGGCAATTTTCGATGATGCAGCTTGGGCGCAGGGTCGATGCGACG  
CAATCGTCCGATCCGGAGCCGGGACTGTCGGGCGTACACAAATCGCCCGCAGAAGCGCGGCCGTCTGGAC  
CGATGGCTGTGTAGAAGTACTCGCCGATAGTGGAACCGACGCCCCAGCACTCGTCCGAGGGCAAAGGAA  
TAGAGTAGATGCCGACCGAACAAGAGCTGATTTGAGAACGCCTCAGCCAGCAACTCGCGCGAGCCTAGC  
AAGGCAAATGCGAGAGAACGGCCTTACGCTTGGTGGCACAGTTCTCGTCCACAGTTCGCTAAGCTCGCTC  
GGCTGGGTCGCGGGAGGGCCGGTCGCAGTGATTACAGGAATTAATTCCTTAGAGTCAAGCAGATCGTTCAA  
ACATTTGGCAATAAAGTTTCTTAAGATTGAATCCTGTTGCCGGTCTTGCGATGATTATCATATAATTTCT  
GTTGAATTACGTTAAGCATGTAATAATTAACATGTAATGCATGACGTTATTTATGAGATGGGTTTTTATG  
ATTAGAGTCCCGCAATTATACATTTAATACGCGATAGAAAACAAAATATAGCGCGCAAACTAGGATAAAT  
TATCGCGCGCGGTGTCTATGTTACTAGATCGACCGCATGCAAGCTGATAATTC AATTCGGCGTTAA  
TTCAGTACATTAAAAACGTCCGCAATGTGTTATTAAGTTGTCTAAGCGTCAATTTGTTTACACCACAATA  
TATCCTGCCACCAGCCAGCCAACAGCTCCCCGACCGGCAGCTCGGCACAAAATCACCCTCGATACAGGC  
AGCCCATCAGTCCGGGACGGCGTCAGCGGGAGAGCCGTTGTAAGGCGGCAGACTTTGCTCATGTTACCGA  
TGCTATTCGGAAGAACGGCAACTAAGCTGCCGGGTTTGAACACGGATGATCTCGCGGAGGGTAGCATGT  
TGATTGTAACGATGACAGAGCGTTGCTGCCTGTGATCAATTCGGGCACGAACCCAGTGACATAAGCCTC  
GTTCCGTTTCGTAAGCTGTAATGCAAGTAGCGTAACTGCCGTCACGCAACTGGTCCAGAACCTTGACCGAA  
CGCAGCGGTGGTAACGGCGCAGTGGCGGTTTTTCATGGCTTCTTGTTATGACATGTTTTTTTTGGGGTACAG  
TCTATGCCTCGGGCATCCAAGCAGCAAGCGCGTTACGCCGTGGGTCGATGTTTGATGTTATGGAGCAGCA  
ACGATGTTACGCAGCAGGGCAGTCGCCCTAAAACAAAGTTAAACATCATGGGGGAAGCGGTGATCGCCGA  
AGTATCGACTCAACTATCAGAGGTAGTTGGCGTCATCGAGCGCCATCTCGAACCGACGTTGCTGGCCGTA  
CATTTGTACGGCTCCGCAGTGATGGCGGCCTGAAGCCACACAGTGATATTGATTTGCTGGTTACGGTGA  
CCGTAAGGCTTGATGAAACAACGCGGCAGCTTTGATCAACGACCTTTTGAAACTTCGGCTTCCCTTG  
AGAGAGCGAGATTCTCCGCGCTGTAGAAGTCACCATTTGTTGTGCACGACGACATCATTCGTTGGCGTTAT  
CCAGCTAAGCGCGAACTGCAATTTGGAGAATGGCAGCGCAATGACATTCTTGAGGTATCTTCGAGCCAG  
CCACGATCGACATTGATCTGGCTATCTTGCTGACAAAAGCAAGAGAACATAGCGTTGCCTTGGTAGGTCC  
AGCGGCGGAGGAACCTTTTGATCCGGTTCTGAACAGGATCTATTTGAGGCGCTAAATGAAACCTTAACG  
CTATGGAACCTCGCCGCCGACTGGGCTGGCGATGAGCGAAATGTAGTGCTTACGTTGTCCCGCATTTGGT  
ACAGCGCAGTAACCGGCAAAATCGCGCCGAAGGATGTCGCTGCCGACTGGGCAATGGAGCGCCTGCCGGC  
CCAGTATCAGCCCGTCATACTTGAAGCTAGACAGGCTTATCTTGACAGAAGAAGATCGCTTGGCCTCG  
CGCGCAGATCAGTTGGAAGAATTTGTCCACTACGTGAAAGGCGAGATCACCAAGGTAGTCGGCAAATAAT  
GTCTAGCTAGAAATTCGTTCAAGCCGACGCCGCTTCGCCGGCGTTAACTCAAGCGATTAGATGCACTAAG  
CACATAATTGCTCACAGCCAACTATCAGGTCAAGTCTGCTTTTATTATTTTAAAGCGTGATAATAAGC  
CCTACACAAATTGGGAGATATATCATGCATGACCAAAATCCCTTAACGTGAGTTTTCGTTCCACTGAGCG  
TCAGACCCCGTAGAAAAGATCAAAGGATCTTCTTGAGATCCTTTTTTCTGCGCGTAATCTGCTGCTTGC  
AAACAAAAAAACCACCGCTACCAGCGGTGGTTTGTGTTGCCGGATCAAGAGCTACCAACTCTTTTTCCGAA  
GGTAACTGGCTTCAGCAGAGCGCAGATACCAAATACTGTCTTCTAGTGTAGCCGTAGTTAGGCCACCAC  
TTCAAGAACTCTGTAGCACCGCTACATACCTCGCTCTGCTAATCCTGTTACCAGTGGCTGCTGCCAGTG  
GCGATAAGTCGTGTCTTACCGGTTGGACTCAAGACGATAGTTACCGGATAAGGCGCAGCGGTGCGGCTG  
AACGGGGGGTTCTGTGCACACAGCCCAGCTTGGAGCGAACGACCTACACCGAACTGAGATACCTACAGCGT  
GAGCTATGAGAAAGCGCCACGCTTCCCGAAGGGAGAAAGGCGGACAGGTATCCGGTAAGCGGCAGGGTCG  
GAACAGGAGAGCGCACGAGGGAGCTTCCAGGGGGAAACGCCTGGTATCTTTATAGTCCTGTGCGGTTTTCG  
CCACCTCTGACTTGAGCGTCGATTTTTGTGATGCTCGTCAGGGGGCGGAGCCTATGGAAAAACGCCAGC  
AACGCGGCCTTTTTACGGTTCTTGCCCTTTTGCTGGCCTTTTGCTCACATGTTCTTTCTGCGTTATCCC  
CTGATTCTGTGGATAACCGTATTACCGCCTTTGAGTGAGCTGATACCGCTCGCCGCAGCCGAACGACCGA

GCGCAGCGAGTCAGTGAGCGAGGAAGCGGAAGAGCGCCTGATGCGGTATTTTCTCCTTACGCATCTGTGC  
GGTATTTACACCGCATATGGTGACTCTCAGTACAATCTGCTCTGATGCCGCATAGTTAAGCCAGTATA  
CACTCCGCTATCGCTACGTGACTGGGTCTGGCTGCGCCCCGACACCCGCCAACACCCGCTGACGCGCCC  
TGACGGGCTTGTCTGCTCCCGGCATCCGCTTACAGACAAGCTGTGACCGTCTCCGGGAGCTGCATGTGTC  
AGAGGTTTTACCGTCATCACCGAAACGCGCGAGGCAGGGTGCCTTGATGTGGGCGCCGGCGGTTCGAGTG  
GCGACGGCGCGGCTTGTCCGCGCCCTGGTAGATTGCCGTGGCCGTAGGCCAGCCATTTTTGAGCGGCCAGC  
GGCCGCGATAGGCCGACGCGAAGCGCGGGGCGTAGGGAGCGCAGCGACCGAAGGGTAGGCGCTTTTTGC  
AGCTCTTCGGCTGTGCGCTGGCCAGACAGTTATGCACAGGCCAGGCGGGTTTTAAGAGTTTTAATAAGTT  
TTAAAGAGTTTTAGGCGGAAAAATCGCCTTTTTTCTCTTTTATATCAGTCACTTACATGTGTGACCGGTT  
CCCAATGTACGGCTTTGGGTTCCCAATGTACGGGTTCCGTTCCCAATGTACGGCTTTGGGTTCCCAATG  
TACGTGCTATCCACAGGAAAGAGACCTTTTCGACCTTTTTCCCCTGCTAGGGCAATTTGCCCTAGCATCT  
GCTCCGTACATTAGGAACCGGCGGATGCTTCGCCCTCGATCAGGTTGCGGTAGCGCATGACTAGGATCGG  
GCCAGCCTGCCCCGCTCCTCCTTCAAATCGTACTCCGGCAGGTCAATTTGACCCGATCAGCTTGCGCACG  
GTGAAACAGAACTTCTTGAACCTCTCCGGCGCTGCCACTGCGTTCGTAGATCGTCTTGAACAACCATCTGG  
CTTCTGCCTTGCTGCGCGCGGCGTGCCAGGCGGTAGAGAAAACGGCCGATGCCGGGATCGATCAAAAA  
GTAATCGGGGTGAACCGTCAGCACGTCCGGGTCTTGCCCTTCTGTGATCTCGCGGTACATCCAATCAGCT  
AGCTCGATCTCGATGTACTCCGGCCGCCGGTTTCGCTCTTTACGATCTTGATAGCGGCTAATCAAGGCTT  
CACCTCGGATACCGTCACCGAGGCGGCGTTCTTGCCCTTCTTCGTACGCTGCATGGCAACGTGCGTGGT  
GTTTAACCGAATGCAGGTTTCTACCAGGTCGTCTTCTGCTTTCCGCCATCGGCTCGCCGGCAGAACTTG  
AGTACGTCCGCAACGTGTGGACGGAACACGCGGCCGGGCTTGTCTCCCTTCCCTTCCCGGTATCGGTTCA  
TGGATTTCGGTTAGATGGGAAACCGCCATCAGTACCAGGTCGTAATCCACACACTGGCCATGCCGGCCGG  
CCCTGCGGAAACCTCTACGTGCCCCTGCTGGAAGCTCGTAGCGGATCACCTCGCCAGCTCGTCGGTCACGC  
TTCGACAGACGGAACCGGCCACGTCCATGATGCTGCGACTATCGCGGGTGCCACGTATAGAGCATCG  
GAACGAAAAAATCTGGTTGCTCGTCGCCCTTGGGCGGCTTCCTAATCGACGGCGCACCGGCTGCCGGCGG  
TTGCCGGGATTCTTTGCGGATTTCGATCAGCGGCCGCTTGCCACGATTCACCGGGGCGTGCTTCTGCCTCG  
ATGCGTTGCCGCTGGGCGGCCTGCGCGGCTTCAACTTCTCCACCAGGTCATCACCCAGCGCCGCGCCGA  
TTTGTACCGGGCCGGATGGTTTGCGACCGTCACGCCGATTTCCTCGGGCTTGGGGGTTCCAGTGCCATTGC  
AGGGCCGGCAGACAACCCAGCGCTTACGCTTGCCAAACCGCCGTTCTCCACACATGGGGCATTCCAC  
GGCGTCGGTGCTGGTTGTCTTGATTTTCCATGCCGCTCCTTTAGCCGCTAAAATTCATCTACTCATT  
TATTCATTTGCTCATTTACTCTGGTAGCTGCGCGATGTATTAGATAGCAGCTCGGTAATGGTCTTGCCCT  
TGGCGTACCGGTACATCTTCAGCTTGGTGTGATCCTCCGCCGGCAACTGAAAGTTGACCCGCTTCATGG  
CTGGCGTGTCTGCCAGGCTGGCCAACGTTGCAGCCTTGCTGCTGCGTGCGCTCGGACGGCCGGCAGTTAG  
CGTGTTTGTGCTTTTGCTCATTCTTCTTTACCTCATTAACCTCAAATGAGTTTTGATTTAATTTACGCGG  
CCAGCGCTTGACCTCGCGGGCAGCGTCGCCCTCGGGTTCTGATTCAAGAACGGTTGTGCCGGCGGGCGG  
AGTGCTTGGGTAGCTCACGCGCTGCGTGATACGGGACTCAAGAATGGGCAGCTCGTACCCGGCCAGCGCC  
TCGGCAACCTCACCGCCGATGCGCGTGCCCTTGATCGCCCGCGACACGACAAAGGCCGCTTGATAGCCTTC  
CATCCGTGACCTCAATGCGCTGCTTAACCAGCTCCACCAGGTCGGCGGTGGCCCATATGTCGTAAGGGCT  
TGGCTGCACCGGAATCAGCACGAAGTCGGCTGCCTTGATCGCGGACACAGCCAAGTCCGCCGCTGGGGC  
GCTCCGTGATCACTACGAAGTCGCGCCGGCCGATGGCCTTCACGTGCGGGTCAATCGTCGGGCGGTTCGA  
TGCCGACAACGGTTAGCGGTGATCTTCCCGCACGGCCGCCAATCGCGGGCACTGCCCTGGGGATCGGA  
ATCGACTAACAGAACATCGGCCCCGGCGAGTTGCAGGGCGGGCTAGATGGGTTGCGATGGTCTGCTTG  
CCTGACCCGCCTTTCTGGTTAAGTACAGCGATAACCTTCATGCGTTCCCCTTGCGTATTTGTTTATTAC  
TCATCGCATCATATACGACGACCGCATGACGCAAGCTGTTTTACTCAAATACACATCACCTTTTTAGA  
CGGCGGCGCTCGGTTTCTTCAGCGGCCAAGCTGGCCGGCCAGGCCGCCAGCTTGGCATCAGACAAACCGG



CCAGGATTTTCATGCAGCCGCACGGTTGAGACGTGCGCGGGCGGCTCGAACACGTACCCGGCCGCGATCAT  
CTCCGCCTCGATCTCTTCGGTAATGAAAAACGGTTTCGTCTTGCCGTCTTGGTGCGGTTTCATGCTTGTT  
CCTCTTGGCGTTTCATTCTCGGCGGCCGCCAGGGCGTCGGCCTCGGTCAATGCGTCCTCACGGAAGGCACC  
GCGCCGCTTGGCCTCGGTGGGCGTCACTTCCTCGCTGCGCTCAAGTGC CGGTACAGGGTCGAGCGATGC  
ACGCCAAGCAGTGCAGCCGCTCTTTACGGTGCGGCCTTCCTGGTCGATCAGCTCGCGGGCGTGCGGA  
TCTGTGCCGGGTGAGGGTAGGGCGGGGCCAAACTTCACGCCTCGGGCCTTGGCGGCCTCGCGCCCGCT  
CCGGTGCGGTTCGATGATTAGGGAACGCTCGAACTCGGCAATGCCGGCGAACACGGTCAACACCATGCGG  
CCGGCCGGCGTGGTGGTGTCGGGCCACGGCTCTGCCAGGCTACGCAGGCCCGCGCCGGCCTCTTGATGC  
GCTCGGCAATGTCCAGTAGGTGCGGGTGCTGCGGGCCAGGCGGTCTAGCCTGGTCACTGTCACAACGTC  
GCCAGGGCGTAGGTGGTCAAGCATCCTGGCCAGCTCCGGGCGGTGCGCCTGGTGCCGGTGATCTTCTCG  
GAAAACAGCTTGGTGACGCCGGCGGTGCAGTTCGGCCCGTTGGTTGGTCAAGTCTTGGTCGTGCGTG  
TGACGCGGGCATAGCCCAGCAGGCCAGCGCGGCGCTCTTGTTTCATGGCGTAATGTCTCCGGTTCTAGTC  
GCAAGTATTCTACTTTATGCGACTAAAACACGCGACAAGAAAACGCCAGGAAAAGGGCAGGGCGGCAGCC  
TGTCGCGTAACCTTAGGACTTGTCGACATGTGTTTTTCAGAAGACGGCTGCACTGAACGTCAGAAGCCGA  
CTGCACTATAGCAGCGAGGGGTTGGATCAAAGTACTTTGATCCCGAGGGGAACCTGTGGTTGGCATGC  
ACATACAAATGGACGAACGGATAAACCTTTTCACGCCCTTTTAAATATCCGTTATTCTAATAAACGCTCT  
TTTCTCTTAGGTTTACCCGCCAATATATCCTGTCAAACACTGATAGTTTAACTGAAGGCGGGAACGAC  
AATCTGATCCAAGCTCAAGCTAAGCTTGAGCTCTGCATGCCTGCAGGTCCCCAGATTAGCCTTTTCAATT  
TCAGAAAGAATGCTAACCACAGATGGTTAGAGAGGCTTACGCAGCAGGTCTCATCAAGACGATCTACCC  
GAGCAATAATCTCCAGGAAATCAAATACCTTCCCAAGAAGGTTAAAGATGCAGTCAAAAGATTGAGACT  
AACTGCATCAAGAACACAGAGAAAGATATATTTCTCAAGATCAGAAGTACTATTCCAGTATGGACGATTC  
AAGGCTTGCTTCACAAACCAAGGCAAGTAATAGAGATTGGAGTCTCTAAAAAGGTAGTTCCCACTGAATC  
AAAGGCCATGGAGTCAAAGATTCAAATAGAGGACCTAACAGAACTCGCCGTAAAGACTGGCGAACAGTTC  
ATACAGAGTCTCTTACGACTCAATGACAAGAAGAAAATCTTCGTCAACATGGTGGAGCACGACACACTTG  
TCTACTCCAAAAATATCAAAGATACAGTCTCAGAAGACCAAAGGGCAATTGAGACTTTTCAACAAAGGGT  
AATATCCGGAAACCTCCTCGGATTCCATTGCCCAGCTATCTGTCACTTTATTGTGAAGATAGTGGAAAAG  
GAAGGTGGCTCCTACAAATGCCATCATTGCGATAAAGGAAAGGCCATCGTTGAAGATGCCTCTGCCGACA  
GTGGTCCCAAGATGGACCCCCACCCACGAGGAGCATCGTGAAAAAGAAGACGTTCCAACCACGTCTTC  
AAAGCAAGTGGATTGATGTGATATCTCCACTGACGTAAGGGATGACGCACAATCCCACTATCCTTCGCAA  
GACCCTTCCTCTATATAAGGAAGTTCATTTTCATTTGGAGAGAACACGGGGGACTCTAGAGGATCCAAGGA  
GATATAAGCCGCCACCATGGATTACAAGGACGATGATGACAAGGACTACAAGGACGATGACGATAAGGAC  
TATAAGGATGACGATGACAAGGATTACGCCGAGGTCATGGAACGTGCGATCCAGGGCAATGATGCGCGTG  
AACAGGCGAACAGCGAACGTTGGGATGGCGGCTCTGGCGGCACGACTAGCCCGTTCAAACCTGCCGGATGA  
AAGCCCGTCTTGACCGAATGGCGTCTGCACAACGACGAGACGAACAGCAACCAGGATAACCCGCTGGGT  
TTCAAAGAAAAGCTGGGGCTTTGGCAAAGTGGTGTTCAAACGTTACCTGCGTTATGACCGCACCGAAGCGT  
CACTGCACCGTGTGCTGGGTTCTTGGACGGGCGACAGCGTGAACCTACGCGGCGAGCCGTTTCTTCGGCTT  
CGACCAGATCGGTTGCACCTACAGCATCCGTTTCCGTGGTGTGAGCATACCGTGAGCGGTGGTAGCCGT  
ACCCTGCAGCACCTGTGCGAAATGGCGATCCGTAGCAAAACAGGAACTCCTTCAACTGGCGCCGATCGAAG  
TGGAATCTAACGTGTCGCGTGGCTGTCCGGAAGGTACCGAAACCTTCGAAAAAGAAAGCGAACCTCTTCC  
CTAATGATATCCCGCGGCCATGCTAGAGTCCGCAAAAATCACCAGTCTCTCTCTACAAATCTATCTCTCT  
CTATTTTTCTCCAGAATAATGTGTGAGTAGTTCAGATAAGGGAATTAGGGTCTTATAGGGTTTCGCT  
CATGTGTTGAGCATATAAGAAACCTTAGTATGTATTTGTATTTGTAAAATACTTCTATCAATAAAATTT  
CTAATTCCTAAAACCAAAATCCAGTGACCTGCAGGCATGCGACGTCG

### Sequence of pMS4 (35S-GFP)

GGCCGCACTAGTGATATCCCGCGGCCATGGCGGCCGGGAGCATGCGACGTGCGGCCCAATTGCCCCTATA  
GTGAGTCGTATTACAATTCAGTGGCCGTCGTTTTACAACGTCGTGACTGGGAAAACCCTGGCGTTACCCA  
ACTTAATCGCCTTGACGACATCCCCCTTTCGCCAGCTGGCGTAATAGCGAAGAGGCCCGCACCGATCGC  
CCTTCCCAACAGTTGCGCAGCCTGAATGGCGAATGGAAATTGTAAACGTTAATGGGTTTCTGGAGTTTAA  
TGAGCTAAGCACATACGTGAGAAACCATTATTGCGCGTTCAAAAGTCGCTAAGGTCACTATCAGCTAGC  
AAATATTTCTTGTCAAAAATGCTCCACTGACGTTCCATAAAATTCCTTCGGTATCCAATTAGAGTCTCAT  
ATTCAGTCTCAATCCAAATAATCTGCAATGGCAATTACCTTATCCGCAACTTCTTTACCTATTTCCGCCC  
GGATCCGGGCAGGTTCTCCGGCCGCTTGGGTGGAGAGGCTATTGCGCTATGACTGGGCACAACAGACAAT  
CGGCTGCTCTGATGCCGCCGTGTTCCGGCTGTGAGCGCAGGGGCGCCCGTTCTTTTTTGTCAAGACCGAC  
CTGTCCGGTGCCCTGAATGAACTGCAGGACGAGGCGCGGCTATCGTGGCTGGCCACGACGGGCGTTTC  
CTTGCGCAGCTGTGCTCGACGTTGTCACTGAAGCGGGAAGGGACTGGCTGCTATTGGGCGAAGTGCCGGG  
GCAGGATCTCCTGTCTCATCTCACCTTGCTCCTGCCGAGAAAGTATCCATCATGGCTGATGCAATGCGGCGG  
CTGCATACGCTTGATCCGGCTACCTGCCCATTCGACCACCAAGCGAAACATCGCATCGAGCGAGCACGTA  
CTCGGATGGAAGCCGGTCTTGTGATCAGGATGATCTGGACGAAGAGCATCAGGGGCTCGCGCCAGCCGA  
ACTGTTTCGCCAGGCTCAAGGCGCGCATGCCCGACGGCGAGGATCTCGTCGTGACCCATGGCGATGCCTGC  
TTGCCGAATATCATGGTGAAAATGGCCGCTTTTTCTGGATTTCATCGACTGTGGCCGGCTGGGTGTGGCGG  
ACCGCTATCAGGACATAGCGTTGGCTACCCGTGATATTGCTGAAGAGCTTGGCGGCAATGGGCTGACCG  
CTTCCTCGTGCTTTACGGTATCGCCGCTCCCGATTTCGACGCGCATCGCCTTCTATCGCCTTCTTGACGAG  
TTCTTCTGAGCGGGACTCTGGGGTTCGAAATGACCGACCAAGCGACGCCCAACCTGCCATCACGAGATTT  
CGATTCACCGCCGCCCTTCTATGAAAGGTTGGGCTTCGGAATCGTTTTCCGGGACGCCGGCTGGATGATC  
CTCCAGCGCGGGGATCTCATGCTGGAGTTCTTCGCCACCCCGATCCAACACTTACGTTTGCAACGTCCA  
AGAGCAAAATAGACCAGAACGCCGGAAGGTTGCCGCGAGCGTGTGGATTGCGTCTCAATTCTCTCTTGAG  
GAATGCAATGATGAATATGATACTGACTATGAACTTTGAGGGAATACTGCCTAGCACCGTCACCTCATA  
ACGTGCATCATGCATGCCCTGACAACATGGAACATCGCTATTTTTTCTGAAGAATTATGCTCGTTGGAGGA  
TGTCGCGGCAATTGCAGCTATTGCCAACATCGAACTACCCCTCACGCATGCATTCATCAATATTATTCAT  
GCGGGGAAAGGCAAGATTAATCCAACCTGGCAAATCATCCAGCGTGATTGGTAACTTCAGTTCCAGCGACT  
TGATTGTTTTTGGTGCTACCCACGTTTTCAATAAGGACGAGATGGTGGAGTAAAGAAGGAGTGCGTCGAA  
GCAGATCGTTCAAACATTTGGCAATAAAGTTTCTTAAGATTGAATCCTGTTGCCGGTCTTGCGATGATTA  
TCATATAATTTCTGTTGAATTACGTTAAGCATGTAATAATTAACATGTAATGCATGACGTTATTTATGAG  
ATGGGTTTTTATGATTAGAGTCCCGCAATTATACATTTAATACGCGATAGAAAACAAAATATAGCGCGCA  
AACTAGGATAAATTATCGCGCGCGGTGTATCTATGTTACTAGATCGAATTAATTCCAGGCGGTGAAGGG  
CAATCAGCTGTTGCCGCTCTCACTGGTGAAAAGAAAAACCAACCCAGTACATTAAAAACGTCCGCAATGT  
GTTATTAAGTTGTCTAAGCGTCAATTTGTTTACACCACAATATATCCTGCCACCAGCCAGCCAACAGCTC  
CCCGACCGGCAGCTCGGCACAAAATCACCCTCGATACAGGCAGCCCATCAGTCCGGGACGGCGTCAGCG  
GGAGAGCCGTTGTAAGGCGGCAGACTTTGCTCATGTTACCGATGCTATTTCGGAAGAACGGCAACTAAGCT  
GCCGGGTTTGAAACACGGATGATCTCGCGGAGGGTAGCATGTTGATTGTAACGATGACAGAGCGTTGCTG  
CCTGTGATCAAAATATCATCTCCCTCGCAGAGATCCGAATTATCAGCCTTCTTATTCATTTCTCGCTTAAC  
CGTGACAGGCTGTGATCTTGAGAACTATGCCGACATAATAGGAAATCGCTGGATAAAGCCGCTGAGGAA  
GCTGAGTGGCGCTATTTCTTTAGAAGTGAACGTTGACGATGTGACGGATCTTTTCCGCTGCATAACCCT  
GCTTCGGGGTCATTATAGCGATTTTTTCGGTATATCCATCCTTTTTTCGCACGATATACAGGATTTTGCCA  
AAGGGTTCGTGTAGACTTTCCTTGGTGTATCCAACGGCGTCAGCCGGGCAGGATAGGTGAAGTAGGCCCA  
CCCGCAGCGGGTGTTCCTTCTTCACTGTCCCTTATTCGCACCTGGCGGTGCTCAACGGGAATCCTGCTC  
TGCGAGGCTGGCCGGCTACCGCCGGCGTAACAGATGAGGGCAAGCGGATGGCTGATGAAACCAAGCCAAC

CAGGGGTGATGCTGCCAACTTACTGATTTAGTGTATGATGGTGTTTTTGAGGTGCTCCAGTGGCTTCTGT  
TTCTATCAGCTGTCCCTCCTGTTTCTGCTACTGACGGGGTGGTGCCTAACGGCAAAAGCACCGCCGGACAT  
CAGCGCTATCTCTGCTCTCACTGCCGTAAAACATGGCAACTGCAGTTCACCTTACACCGCTTCTCAACCCG  
GTACGCACCAGAAAATCATTTGATATGGCCATGAATGGCGTTGGATGCCGGGCAACAGCCCGCATTATGGG  
CGTTGGCCTCAACACGATTTTACGTCACTTAAAAAACTCAGGCCGCAGTCGGTAACCTCGCGCATACAGC  
CGGGCAGTGACGTATCGTCTGCGCGGAAATGGACGAACAGTGGGGCTATGTCGGGGCTAAATCGCGCCA  
GCGCTGGCTGTTTTACGCGTATGACAGTCTCCGGAAGACGGTTGTTGCGCACGTATTTCGGTGAACGCACT  
ATGGCGACGCTGGGGCGTCTTATGAGCCTGCTGTACCCCTTTGACGTGGTGATATGGATGACGGATGGCT  
GGCCGCTGTATGAATCCCGCCTGAAGGGAAAGCTGCACGTAATCAGCAAGCGATATACGCAGCGAATTGA  
GCGGCATAACCTGAATCTGAGGCAGCACCTGGCACGGCTGGGACGGAAGTCGCTGTCTGTTCTCAAAATCG  
GTGGAGCTGCATGACAAAGTCATCGGGCATTATCTGAACATAAAACACTATCAATAAGTTGGAGTCATTA  
CCCAACCAGGAAGGGCAGCCACCTATCAAGGTGTACTGCCTTCCAGACGAACGAAGAGCGATTGAGGAA  
AAGGCGCGCGCGCCGGCATGAGCCTGTCGGCCTACCTGCTGGCCGTCGGCCAGGGCTACAAAATCACGG  
GCGTCGTGGACTATGAGCACGTCCGCGAGCTGGCCCGCATCAATGGCGACCTGGGCCGCTGGGGCGCCT  
GCTGAAACTCTGGCTCACCGACGACCCGCGCACGGCGCGGTTTCGGTGATGCCACGATCCTCGCCCTGCTG  
GCGAAGATCGAAGAGAAGCAGGACGAGCTTGGCAAGGTCATGATGGGCGTGGTCCGCCCAGGGCAGAGC  
CATGACTTTTTTAGCCGCTAAAACGGCCGGGGGTGCGCGTGATTGCCAAGCACGTCCCATGCGCTCCA  
TCAAGAAGAGCGACTTCGCGGAGCTGGTATTTCGTGCAGGGCAAGATTCGGAATACCAAGTACGAGAAGGA  
CGGCCAGACGGTCTACGGGACCGACTTCATTGCCGATAAGGTGGATTATCTGGACACCAAGGCACCAGGC  
GGGTCAAATCAGGAATAAGGGCACATTGCCCGCGCTGAGTCGGGGCAATCCCGCAAGGAGGGTGAATGA  
ATCGGACGTTTTGACCGGAAGGCATACAGGCAAGAACTGATCGACGCGGGGTTTTCCGCCGAGGATGCCGA  
AACCATCGCAAGCCGCACCGTCATGCGTGCGCCCCGCGAAACCTTCCAGTCCGTCGGCTCGATGGTCCAG  
CAAGCTACGGCCAAGATCGAGCGCGACAGCGTGCAACTGGCTCCCCCTGCCCTGCCCGCGCCATCGGCCG  
CCGTGGAGCGTTTCGCGTCTCTGAACAGGAGGCGGCAGGTTTGGCGAAGTCGATGACCATCGACACGCG  
AGGAACTATGACGACCAAGAAGCGAAAAACCGCCGCGAGGACCTGGCAAAACAGGTCAGCGAGGCCAAG  
CAGGCCGCGTTGCTGAAACACACGAAGCAGCAGATCAAGGAAATGCAGCTTTCCTTGTTCGATATTGCGC  
CGTGGCCGGACACGATGCGAGCGATGCCAAACGACACGGCCCGCTCTGCCCTGTTTACCACGCGCAACAA  
GAAAATCCCGCGCGAGGCGCTGCAAAACAAGGTCATTTTCCACGTCAACAAGGACGTGAAGATCACCTAC  
ACCGGCGTCGAGCTGCGGGCCGACGATGACGAACTGGTGTGGCAGCAGGTGTTGGAGTACGCGAAGCGCA  
CCCCATATCGGCGAGCCGATCACCTTACGTTTCTACGAGCTTTGCCAGGACCTGGGCTGGTTCGATCAATGG  
CCGGTATTACACGAAGGCCGAGGAATGCCTGTGCGCCTACAGGCGACGGCGATGGGCTTACGTCCGAC  
CGCGTTGGGCACCTGGAATCGGTGTGCTGCTGCACCGCTTCCGCGTCCTGGACCGTGGCAAGAAAACGT  
CCCGTTGCCAGGTCTGATCGACGAGGAAATCGTCTGTGTTGCTGGCGACCACTACACGAAATTCAT  
ATGGGAGAAGTACCGCAAGCTGTGCGCGACGGCCGACGGATGTTTCGACTATTTAGCTCGCACCGGGAG  
CCGTACCCGCTCAAGCTGGAAACCTTCCGCCTCATGTGCGGATCGGATTCCACCCGCGTGAAGAAGTGGC  
GCGAGCAGGTGCGCGAAGCCTGCGAAGAGTTGCGAGGCGACGGCCTGGTGGAAACACGCCTGGGTCAATGA  
TGACCTGGTGCATTGCAAACGCTAGGGCCTTGTGGGGTCAGTTCCGGCTGGGGGTTTACGAGCCAGCGCT  
TTACTGGCATTTCAGGAACAAGCGGGCACTGCTCGACGCACTTGCTTCGCTCAGTATCGCTCGGGACGCA  
CGGCGCGCTCTACGAACTGCCGATAAACAGAGGATTAAAATTGACAATTGTGATTAAGGCTCAGATTCGA  
CGGCTTGGAGCGGCCGAGTGCAGGATTTCCGCGAGATCCGATTGTGCGGCCCTGAAGAAAGCTCCAGAGA  
TGTTCCGGTCCGTTTACGAGCACGAGGAGAAAAAGCCCATGGAGGCGTTTCGCTGAACGGTTGCGAGATGC  
CGTGGCATTTCGGCGCTTACATCGACGGCGAGATCATTGGGCTGTGCGTCTTCAAACAGGAGGACGGCCCC  
AAGGACGCTCACAAGGCGCATCTGTCCGGCGTTTTTCGTGGAGCCCGAACAGCGAGGCCGAGGGGTGCGCG  
GTATGCTGCTGCGGGCGTTGCCGGCGGGTTTTATTGCTCGTGATGATCGTCCGACAGATTCCAACGGGAAT

CTGGTGGATGCGCATCTTCATCCTCGGCGCACTTAATATTTTCGCTATTCTGGAGCTTGTTGTTTATTTTCG  
GTCTACCGCCTGCCGGGCGGGGTCGCGGCGACGGTAGGCGCTGTGCAGCCGCTGATGGTCGTGTTTCATCT  
CTGCCGCTCTGCTAGGTAGCCCGATACGATTGATGGCGGTCTGGGGGCTATTTGCGGAACTGCGGGCGT  
GGCGCTGTTGGTGTGACACCAAACGCAGCGCTAGATCCTGTGCGGCTCGCAGCGGGCCTGGCGGGGGCG  
GTTTCCATGGCGTTCGGAACCGTGCTGACCCGCAAGTGGCAACCTCCCGTGCCTCTGCTCACCTTTACCG  
CCTGGCAACTGGCGGCCGAGGACTTCTGCTCGTTCCAGTAGCTTTAGTGTTTGATCCGCCAATCCCGAT  
GCCTACAGGAACCAATGTCTCGGCCTGGCGTGGCTCGGCCTGATCGGAGCGGGTTAACCTACTTCCTT  
TGGTTCGGGGGATCTCGGCACTCGAACCTACAGTTGTTTCCTTACTGGGCTTTCTCAGCCGGGATGGCG  
CTAAGAAGCTATTGCCGCCGATCTTCATATGCGGTGTGAAATACCGCACAGATGCGTAAGGAGAAAATAC  
CGCATCAGGCGCTCTTCGCTTCCTCGCTCACTGACTCGCTGCGCTCGGTTCGGCTGCGGCGAGCGG  
TATCAGCTCACTCAAAGCGGTAATACGGTTATCCACAGAATCAGGGGATAACGCAGGAAAGAACATGTG  
AGCAAAAGGCCAGCAAAAGGCCAGGAACCGTAAAAAGCCGCGTTGCTGGCGTTTTTTCATAGGCTCCGC  
CCCCCTGACGAGCATCAGAAAAATCGACGCTCAAGTCAGAGGTGGCGAAACCCGACAGGACTATAAAGAT  
ACCAGGCGTTTTCCCCCTGGAAGCTCCCTCGTGCGCTCTCCTGTTCCGACCCTGCCGCTTACCGGATACCT  
GTCCGCCTTTCTCCCTTCGGGAAGCGTGGCGCTTTCTCAATGCTCACGCTGTAGGTATCTCAGTTCGGTG  
TAGGTCGTTTCGCTCCAAGCTGGGCTGTGTGCACGAACCCCCCGTTCAGCCCGACCGCTGCGCCTTATCCG  
GTAAGTATCGTCTTGAGTCCAACCCGTAAGACACGACTTATCGCCACTGGCAGCAGCCACTGGTAACAG  
GATTAGCAGAGCGAGGTATGTAGGCGGTGCTACAGAGTTCTTGAAGTGGTGGCCTAACTACGGCTACACT  
AGAAGGACAGTATTTGGTATCTGCGCTCTGCTGAAGCCAGTTACCTTCGAAAAAGAGTTGGTAGCTCTT  
GATCCGGCAAACAAACCACCGCTGGTAGCGGTGGTTTTTTTGTGTTGCAAGCAGCAGATTACGCGCAGAAA  
AAAAGGATATCAAGAAGATCCTTTGATCTTTTCTACGGGTCTGACGCTCAGTGGAACGAAAACCTCACGT  
TAAGGGATTTTGGTCATGAGATTATCAAAAAGGATCTTCACCTAGATCCTTTTAAATTAAAAATGAAGTT  
TTAAATCAATCTAAAGTATATATGAGTAAACTTGGTCTGACAGTTACCAATGCTTAATCAGTGAGGCACC  
TATCTCAGCGATCTGTCTATTTTCGTTTATCCATAGTTGCCTGACTCCCCGTCGTGTAGATAACTACGATA  
CGGGAGGGCTTACCATCTGGCCCCAGTGTGCAATGATACCGCGAGACCCACGCTCACCGGCTCCAGATT  
TATCAGCAATAAACAGCCAGCCGGAAGGGCCGAGCGCAGAAGTGGTCCTGCAACTTTATCCGCCTCCAT  
CCAGTCTATTAAACAAGTGGCAGCAACGGATTTCGAAACCTGTACGCCTTTTGTGCCAAAAGCCGCGCC  
AGGTTTGCATCCGCTGTGCCAGGCGTTAGGCGTCATATGAAGATTTTCGGTGATCCCTGAGCAGGTGGCG  
GAAACATTGGATGCTGAGAACCATTTTCATTGTTTCGTGAAGTGTTCGATGTGCACCTATCCGACCAAGGCT  
TTGAACTATCTACCAGAAGTGTGAGCCCTACCGGAAGGATTACATCTCGGATGATGACTCTGATGAAGA  
CTCTGCTTGCTATGGCGCATTCATCGACCAAGAGCTTGTGCGGAAGATTGAACTCAACTCAACATGGAAC  
GATCTAGCCTCTATCGAACACATTGTTGTGTGCGCACACGCCAGGCAAAGGAGTCGCGCACAGTCTCA  
TCGAATTTGCGAAAAAGTGGGCACTAAGCAGACAGCTCCTTGGCATAACGATTAGAGACACAAACGAACAA  
TGTACCTGCCTGCAATTTGTACGCAAAATGTGGCTTTACTCTCGGCGGCATTGACCTGTTACGTATAAA  
ACTAGACCTCAAGTCTCGAACGAAACAGCGATGTACTGGTACTGGTTCTCGGGAGCACAGGATGACGCCT  
AACAAATTCATTCAAGCCGACACCGCTTCGCGGCGCGGCTTAATTCAGGAGTTAAACATCATGAGGGAAGC  
GGTGATCGCCGAAGTATCGACTCAACTATCAGAGGTAGTTGGCGTCATCGAGCGCCATCTCGAACCGACG  
TTGCTGGCCGTACATTTGTACGGCTCCGCAGTGGATGGCGGCCTGAAGCCACACAGTGATATTGATTTGC  
TGGTTACGGTGACCGTAAGGCTTGATGAAACAACGCGCGAGCTTTGATCAACGACCTTTTGGAACTTC  
GGCTTCCCCTGGAGAGAGCGAGATTCTCCGCGCTGTAGAAGTCACCATTTGTTGTGCACGACGACATCATT  
CCGTGGCGTTATCCAGCTAAGCGCGAACTGCAATTTGGAGAATGGCAGCGCAATGACATTCTTGCAGGTA  
TCTTCGAGCCAGCCACGATCGACATTGATCTGGCTATCTTGCTGACAAAAGCAAGAGAACATAGCGTTGC  
CTTGGTAGGTCCAGCGCGGAGGAACCTTTGATCCGGTTCCTGAACAGGATCTATTTGAGGCGCTAAAT  
GAAACCTTAACGCTATGGAACTCGCCGCCCGACTGGGCTGGCGATGAGCGAAATGTAGTGCTTACGTTGT

CCCGCATTTGGTACAGCGCAGTAACCGGCAAAATCGCGCCGAAGGATGTCGCTGCCGACTGGGCAATGGA  
GCGCCTGCCGGGCCAGTATCAGCCCGTCATACTTGAAGCTAGGCAGGCTTATCTTGGACAAGAAGATCGC  
TTGGCCTCGCGCGCAGATCAGTTGGAAGATTTGTTCACTACGTGAAAGGCGAGATCACCAAGGTAGTCG  
GCAAATAATGTCTAACAAATTCGTTCAAGCCGACGCCGCTTCGCGGCGCGGCTTAAGTCAAGCGTTAGAGA  
GCTGGGGAAGACTATGCGCGATCTGTTGAAGGTGGTTCTAAGCCTCGTACTTGCGATGGCATCGGGGCAG  
GCACTTGCTGACCTGCCAATTGTTTTAGTGGATGAAGCTCGTCTTCCCTATGACTACTCCCCATCCAAC  
ACGACATTTCTCCAAGCAACTACGACAACTCCATAAGCAATTACGACAATAGTCCATCAAATTACGACAA  
CTCTGAGAGCAACTACGATAATAGTTTCAATCAATTACGACAATAGTCGCAACGGAAATCGTAGGCTTATA  
TATAGCGCAAATGGGTCTCGCACTTTTCGCCGGCTACTACGTCAATTGCCAACAAATGGGACAACGAACTTCT  
TTTCCACATCTGGCAAAAGGATGTTCTACACCCCAAAAGGGGGCGCGGCGTCTATGGCGGCAAAGATGG  
GAGCTTCTGCGGGGCATTGGTCGTCATAAATGGCCAATTTTCGCTTGCCCTGACAGATAACGGCCTGAAG  
ATCATGTATCTAAGCAACTAGCCTGCTCTCTAATAAAATGTTAGGAGCTTGGCTGCCATTTTGGGGTGA  
GGCCGTTTCGCGGCCGAGGGGCGCAGCCCTGGGGGGATGGGAGGCCCGCGTTAGCGGGCCGGGAGGGTTC  
GAGAAGGGGGGGCACCCCCCTTCGGCGTGCGCGGTACGCGCCAGGGCGCAGCCCTGGTTAAAAACAAGG  
TTTATAAATATTGGTTTAAAAGCAGGTTAAAAGACAGGTTAGCGGTGGCCGAAAAACGGGCGGAAACCCCT  
TGCAATGCTGGATTTTCTGCCTGTGGACAGCCCCCTCAAATGTCAATAGGTGCGCCCCCTCATCTGTCAGC  
ACTCTGCCCTCAAGTGTCAGGATCGCGCCCCCTCATCTGTCAGTAGTCGCGCCCCCTCAAGTGTCATAAC  
CGCAGGGCACTTATCCCCAGGCTTGTCCACATCATCTGTGGGAACTCGCGTAAATCAGGCGTTTTTCGC  
CGATTTGCGAGGCTGGCCAGCTCCACGTGCGCGGCCGAAATCGAGCCTGCCCTCATCTGTCAACGCCGC  
GCCGGTGAGTCGGCCCCCTCAAGTGTCACGTCCGCCCTCATCTGTCAGTGAGGGCCAAGTTTTCCGCG  
AGGTATCCACAACGCCGGCGCGCGCGGTGTCTCGCACACGGCTTCGACGGCGTTTTCTGGCGCGTTT  
GCAGGGCCATAGACGGCCGCCAGCCAGCGCGAGGGCAACCAGCCCGGTGAGCGTCGGAAAGGGTCGAC  
ATCTTGCTGCGTTCCGATATTTTCGTGGAGTTCCCGCCACAGACCCGGATTGAAGGCGAGATCCAGCAAC  
TCGCGCCAGATCATCTGTGACGGAACTTTGGCGGTGATGACTGGCCAGGACGTGCGCCGAAAGAGCGA  
CAAGCAGATCACGATTTTCGACAGCGTCGGATTTGCGATCGAGGATTTTTCGGCGCTGCGCTACGTCCGC  
GACCGCGTTGAGGGATCAAGCCACAGCAGCCCACTCGACCTTCTAGCCGACCCAGACGAGCCAAGGGATC  
TTTTTGAATGCTGCTCCGTGCTCAGGCTTTCCGACGTTTGGGTGGTTGAACAGAAGTCATTATCGTACG  
GAATGCCAGCACTCCCAGGGGAACCTGTGGTTGGCATGCACATACAAATGGACGAACGGATAAACCTT  
TTCAGCCCTTTTAAATATCCGTTATTCTAATAAACGCTCTTTTCTCTTAGGTTTACCCGCCAATATATC  
CTGTCAAACACTGATAGTTTAACTGAAGGCGGGAAACGACAATCTGATCATGAGCGGAGAATTAAGGGA  
GTCACGTTATGACCCCCCGCGATGACGCGGGACAAGCCGTTTTACGTTTGGAACTGACAGAACCGCAACG  
ATTGAAGGAGCCACTCAGCCCCAATACGCAAACCGCCTCTCCCCGCGCGTTGGCCGATTCAATTAATGCAG  
CTGGCACGACAGGTTTCCCGACTGGAAGCGGGCAGTGAGCGCAACGCAATTAATGTGAGTTAGCTCACT  
CATTAGGCACCCAGGCTTTACACTTTATGCTTCCGGCTCGTATGTTGTGTGGAATTGTGAGCGGATAAC  
AATTTACACAGGAAACAGCTATGACCATGATTACGCCAAGCTATTTAGGTGACACTATAGAATACTCAA  
GCTATGCATCCAACGCGTTGGGAGCTCTCCCATATCGACCTGCAGGCGGCCGCTCGACGAATTAATTCCA  
ATCCCAAAAAATCTGAGCTTAACAGCACAGTTGCTCCTCTCAGAGCAGAATCGGGTATTCAACACCCCTC  
ATATCAACTACTACGTTGTGTATAACGGTCCACATGCCGGTATATACGATGACTGGGGTGTACAAAGGC  
GGCAACAAACGGCGTTCCCGGAGTTGCACACAAGAAATTTGCCACTATTACAGAGGCAAGAGCAGCAGCT  
GACGCGTACACAACAAGTCAGCAAACAGACAGGTTGAACTTCATCCCCAAAGGAGAAGCTCAACTCAAGC  
CCAAGAGCTTTGCTAAGGCCCTAACAAAGCCACCAAAGCAAAAAGCCCACTGGCTCACGCTAGGAACCAA  
AAGGCCAGCAGTGATCCAGCCCCAAAAGAGATCTCCTTTGCCCGGAGATTACAATGGACGATTTCCCTC  
TATCTTTACGATCTAGGAAGGAAGTTCGAAGGTGAAGGTGACGACACTATGTTTACCCTGATAATGAGA  
AGGTTAGCCTCTTCAATTCAGAAAGAATGCTGACCCACAGATGGTTAGAGAGGCCTACGCAGCAGGTCT

CATCAAGACGATCTACCCGAGTAACAATCTCCAGGAGATCAAATACCTTCCCAAGAAGGTTAAAGATGCA  
GTCAAAAGATTCAAGGACTAATTGCATCAAGAACACAGAGAAAGACATATTTCTCAAGATCAGAAGTACTA  
TTCCAGTATGGACGATTCAAGGCTTGCTTCATAAACCAAGGCAAGTAATAGAGATTGGAGTCTCTAAAAA  
GGTAGTTCTTACTGAATCTAAGGCCATGCATGGAGTCTAAGATTCAAATCGAGGATCTAACAGAACTCGC  
CGTGAAGACTGGCGAACAGTTCATACAGAGTCTTTTACGACTCAATGACAAGAAGAAAATCTTCGTCAAC  
ATGGTGGAGCACGACACTCTGGTCTACTCCAAAAATGTCAAAGATACAGTCTCAGAAGACCAAAGGGCTA  
TTGAGACTTTTCAACAAAGGATAATTTTCGGGAAACCTCCTCGGATTCCATTGCCCAGCTATCTGTCACTT  
CATCGAAAGGACAGTAGAAAAGGAAGGTGGCTCCTACAAATGCCATCATTGCGATAAAGGAAAGGCTATC  
ATTCAAGATCTCTCTGCCGACAGTGGTCCCAAAGATGGACCCCCACCCACGAGGAGCATCGTGAAAAAG  
AAGACGTTCCAACACGCTCTTCAAAGCAAGTGGATTGATGTGACATCTCCACTGACGTAAGGGATGACGC  
ACAATCCCACTATCCTTCGCAAGACCTTCCTCTATATAAGGAAGTTCATTTCAATTTGGAGAGGACACGC  
TCGACTATTTTTACAACAATTACCATGAAGACTAATCTTTTTCTCTTTCTCATCTTTTCACTTCTCTCTAT  
CATTATCCTCGGCCGAATTCTCGAGTCGGGAAAACAACCTTTGGCTACAATCTAGAAGTAAAGGAGAAGA  
ACTTTTCACTGGAGTTGTCCCAATTCTTGTGAATTAGATGGTGATGTTAATGGGTACAAATTTTCTGTCT  
AGTGGAGAGGGTGAAGGTGATGCAACATACGGAACCTTACCCTTAAATTTATTTGCACTACTGGAACAC  
TACCTGTTCCATGGCCAACACTTGTCACTACTTTCTCTTATGGTGTTCATGCTTTTCAAGATACCCAGA  
TCATATGAAGCGGCACGACTTCTTCAAGAGCGCCATGCCTGAGGGATACGTGCAGGAGAGGACCATCTTC  
TTCAAGGACGACGGGAACCTACAAGACACGTGCTGAAGTCAAGTTTGAGGGAGACACCCTCGTCAACAGGA  
TCGAGCTTAAGGGAATCGATTTCAAGGAGGACGGAACATCCTCGGCCACAAGTTGGAATACAACTACAA  
CTCCCAACAACGTATACATCATGGCCGACAAGCAAAAGAACGGCATCAAAGCCAACCTCAAGACCCGCCAC  
AACATCGAAGACGGCGGCTGCAACTCGCTGATCATTATCAACAAAATACTCCAATTGGCGATGGCCCTG  
TCCTTTTACCAGACAACCATTACCTGTCCACACAATCTGCCCTTTTCGAAAGATCCCAACGAAAAGAGAGA  
CCACATGGTCTTCTTGAGTTTGTAAACAGCTGCTGGGATTACACATGGCATGGATGAACTATACAAACAT  
GATGAGCTTTGAACTAGAGTCCTGCTTTAATGAGATATGCGAGACGCCTATGATCGCATGATATTTGCTT  
TCAATTCTGTTGTGCACGTTGTAAAAAACCTGAGCATGTGTAGCTCAGATCCTTACCGCCGGTTTCGGTT  
CATTCTAATGAATATATACCCGTTACTATCGTATTTTTATGAATAATATTCTCCGTTCAATTTACTGAT  
TGTACCCTACTACTTATATGTACAATATTAAAATGAAAACAATATATTGTGCTGAATAGGTTTATAGCGA  
CATCTATGATAGAGCGCCACAATAACAAACAATTGCGTTTTATTATTACAAATCCAATTTTAAAAAAGC  
GGCAGAACCGGTCAAACCTAAAAGACTGATTACATAAATCTTATTCAAATTTCAAAGGCCCCAGGGGCT  
AGTATCTACGACACACCGAGCGGCGAACTAATAACGTTCACTGAAGGGAACCTCCGGTTCCCGCCGGCGC  
GCATGGGTGAGATTCTTGAAGTTGAGTATTGGCCGTCCGCTCTACCGAAAGTTACGGGCACCATTCAAC  
CCGGTCCAGCACGGCGGCCGGGTAACCGACTTGCTGCCCCGAGAATTATGCAGCATTTTTTTGGTGTATG  
TGGGCCCCAAATGAAGTGCAGGTCAAACCTTGACAGTGACGACAAATCGTTGGGCGGGTCCAGGGCGAAT  
TTTGCGACAACATGTCGAGGCTCAGCAGGACCTGCAGGCATGCAAGCTAGCTTACTAGTGATGCATATTC  
TATAGTGTACCTAAATCTGC

## Supplemental Data 2. Related sequences of CTV-N4p23 mutants with point mutation

### Sequence of pH7LIC3.1.1(35S-CCDB)

GGGTACCCTCGAATTATCATACATGAGAATTAAGGGAGTCACGTTATGACCCCGCCGATGACGCGGGACA  
AGCCGTTTTACGTTTGGAACTGACAGAACCGCAACGTTGAAGGAGCCACTGAGCCGCGGGTTTCTGGAGT  
TTAATGAGCTAAGCACATACGTCAGAAACCATTATTGCGCGTTCAAAAGTCGCCTAAGTCACTATCAGC  
TAGCAAATATTTCTTGTCAAAAATGCTCCACTGACGTTCCATAAATCCCCTCGGTATCCAATTAGAGTC  
TCATATTCACCTCTCAACTCGAATCCCCCTATGAAAAAGCCTGAACTCACCGCGACGTCTGTGAGAAGT  
TTCTGATCGAAAAGTTCGACAGCGTCTCCGACCTGATGCAGCTCTCGGAGGGCGAAGAATCTCGTGCTTT  
CAGCTTCGATGTAGGAGGGCGTGATATGTCTGCGGGTAAATAGCTGCGCCGATGGTTTCTACAAAGAT  
CGTTATGTTTATCGGCACCTTTCATCGGCCGCGCTCCCGATTCCGGAAGTGCTTGACATTGGGGAGTTCA  
GCGAGAGCCTGACCTATTGCATCTCCCGCCGTGCACAGGGTGTACGTTGCAAGACCTGCCTGAAACCGA  
ACTGCCGCTGTTCTTCAGCCGGTCGCGGAGGCTATGGATGCTATCGCTGCGGCCGATCTTAGCCAGACG  
AGCGGGTTCGGCCCATTCGGACCGCAAGGAATCGGTCAATACACTACATGGCGTGATTTTCATATGCGCGA  
TTGCTGATCCCCATGTGTATCACTGGCAAACGTGTGATGGACGACACCGTCAGTGCGTCCGTCGCGCAGGC  
TCTCGATGAGCTGATGCTTTGGGCGAGGACTGCCCCGAAGTCCGGCACTCGTGACGCGGATTTCGGCTCC  
AACAATGTCTGACGGACAATGGCCGCATAACAGCGGTCAATTGACTGGAGCGAGGCGATGTTGGGGATT  
CCCAATACGAGGTCGCCAACATCTTCTTCTGGAGGCCGTGGTTGGCTTGATGGAGCAGCAGACGCGCTA  
CTTCGAGCGGAGGCATCCGGAGCTTGCAGGATCGCCAAGGCTCCGGGCGTATATGCTCCGATTGGTCTT  
GACCAACTCTATCAGAGCTTGGTTGACGGCAATTTTCATGATGCAGCTTGGGCGAGGGTCGATGCGACG  
CAATCGTCCGATCCGGAGCCGGGACTGTGCGGGCGTACACAAATCGCCCGCAGAAGCGCGGCCGTCTGGAC  
CGATGGCTGTGTAGAAGTACTCGCCGATAGTGGAACCGACGCCCCAGCACTCGTCCGAGGGCAAAGGAA  
TAGAGTAGATGCCGACCGAACAAGAGCTGATTTGAGAACGCCTCAGCCAGCAACTCGCGCGAGCCTAGC  
AAGGCAAATGCGAGAGAACGGCCTTACGCTTGGTGGCACAGTTCTCGTCCACAGTTCGCTAAGCTCGCTC  
GGCTGGGTGCGGGAGGGCCGGTCGCAGTGATTTCAGGAATTAATTCCTAGAGTCAAGCAGATCGTTCAA  
ACATTTGGCAATAAAGTTTCTTAAGATTGAATCCTGTTGCCGGTCTTGCGATGATTATCATATAATTTCT  
GTTGAATTACGTTAAGCATGTAATAATTAACATGTAATGCATGACGTTATTTATGAGATGGGTTTTTATG  
ATTAGAGTCCCGCAATTATACATTTAATACGCGATAGAAAACAAAATATAGCGCGCAAACTAGGATAAAT  
TATCGCGCGCGGTGTATCTATGTTACTAGATCGACCGCATGCAAGCTGATAATTCGAATTCGGCGTTAA  
TTCAGTACATTAAAAACGTCCGCAATGTGTTATTAAGTTGTCTAAGCGTCAATTTGTTTACACCACAATA  
TATCCTGCCACCAGCCAGCCAACAGCTCCCCGACCGGCAGCTCGGCACAAAATCACCCTCGATACAGGC  
AGCCCATCAGTCCGGGACGGCGTCAGCGGGAGAGCCGTTGTAAGGCGGCAGACTTTGCTCATGTTACCGA  
TGCTATTCCGAAGAACGGCAACTAAGCTGCCGGGTTTGAAACACGGATGATCTCGCGGAGGGTAGCATGT  
TGATTGTAACGATGACAGAGCGTTGCTGCCTGTGATCAATTGCGGCACGAACCCAGTGGACATAAGCCTC  
GTTCCGGTTCGTAAGCTGTAATGCAAGTAGCGTAACTGCCGTACGCAACTGGTCCAGAACCTTGACCGAA  
CGCAGCGGTGGTAACGGCGCAGTGGCGGTTTTTCATGGCTTCTTGTTATGACATGTTTTTTTGGGGTACAG  
TCTATGCCTCGGGCATCCAAGCAGCAAGCGGTTACGCCGTGGGTGATGTTTGATGTTATGGAGCAGCA  
ACGATGTTACGCAGCAGGGCAGTCGCCCTAAAACAAAGTTAAACATCATGGGGGAAGCGGTGATCGCCGA  
AGTATCGACTCAACTATCAGAGGTAGTTGGCGTCATCGAGCGCCATCTCGAACCGACGTTGCTGGCCGTA  
CATTTGTACGGCTCCGCAGTGATGGCGGCCTGAAGCCACACAGTGATATTGATTTGCTGGTTACGGTGA  
CCGTAAGGCTTGATGAAACAACGCGCGAGCTTTGATCAACGACCTTTTGAAACTTCGGCTTCCCCTGG  
AGAGAGCGAGATTCTCCGCGCTGTAGAAGTCAACATTGTTGTGCACGACGACATCATTCCTGGCGTTAT  
CCAGCTAAGCGCGAACTGCAATTTGGAGAATGGCAGCGCAATGACATTCTTGAGGTATCTTCGAGCCAG

CCACGATCGACATTGATCTGGCTATCTTGCTGACAAAAGCAAGAGAACATAGCGTTGCCTTGGTAGGTCC  
AGCGGCGGAGGAACCTCTTTGATCCGGTTCTCTGAACAGGATCTATTTGAGGCGCTAAATGAAACCTTAACG  
CTATGGAACTCGCCGCCGACTGGGCTGGCGATGAGCGAAATGTAGTGCTTACGTTGTCCCGCATTTGGT  
ACAGCGCAGTAACCGGCAAAATCGCGCCGAAGGATGTCGCTGCCGACTGGGCAATGGAGCGCTGCCGGC  
CCAGTATCAGCCCGTCATACTTGAAGCTAGACAGGCTTATCTTGGACAAGAAGAAGATCGCTTGGCCTCG  
CGCGCAGATCAGTTGGAAGAATTTGTCCACTACGTGAAAGGCGAGATCACCAAGGTAGTCGGCAAATAAT  
GTCTAGCTAGAAATTCGTTCAAGCCGACGCCGCTTCGCCGGCGTTAACTCAAGCGATTAGATGCACTAAG  
CACATAATTGCTCACAGCCAACTATCAGGTCAAGTCTGCTTTTATTATTTTAAAGCGTCATAATAAGC  
CCTACACAAATTGGGAGATATATCATGCATGACCAAAATCCCTTAACGTGAGTTTTCTGTTCCACTGAGCG  
TCAGACCCCGTAGAAAAGATCAAAGGATCTTCTTGAGATCCTTTTTTTCTGCGCGTAATCTGCTGCTTGC  
AAACAAAAAAACCACCGCTACCAGCGGTGGTTTGTGTTGCCGGATCAAGAGCTACCAACTCTTTTTCCGAA  
GGTAACTGGCTTCAGCAGAGCGCAGATACCAAATACTGTCTTCTAGTGTAGCCGTAGTTAGGCCACCAC  
TTCAAGAACTCTGTAGCACCAGCTACATACCTCGCTCTGCTAATCCTGTTACCAAGTGGCTGCTGCCAGTG  
GCGATAAGTCGTGTCTTACCGGGTTGGACTCAAGACGATAGTTACCGGATAAGGCGCAGCGGTGCGGCTG  
AACGGGGGGTTCTGTGCACACAGCCCAGCTTGGAGCGAACGACCTACACCGAACTGAGATACCTACAGCGT  
GAGCTATGAGAAAGCGCCACGCTTCCCGAAGGGAGAAAGGCGGACAGGTATCCGGTAAGCGGCAGGGTCG  
GAACAGGAGAGCGCAGAGGGAGCTTCCAGGGGAAACGCTGGTATCTTTATAGTCCTGTGCGGTTTTCG  
CCACCTCTGACTTGAGCGTCGATTTTTGTGATGCTCGTCAGGGGGCGGAGCCTATGAAAAACGCCAGC  
AACGCGGCCTTTTTACGGTTCTTGGCCTTTTGCTGGCCTTTTGCTCACATGTTCTTTCTGCGTTATCCC  
CTGATTCTGTGGATAACCGTATTACCGCCTTTGAGTGAGCTGATACCGCTCGCCGCAGCCGAACGACCGA  
GCGCAGCGAGTCAGTGAGCGAGGAAGCGGAAGAGCGCCTGATGCGGTATTTTCTCCTTACGCATCTGTGC  
GGTATTTACACCGCATATGGTGCACTCTCAGTACAATCTGCTCTGATGCCGCATAGTTAAGCCAGTATA  
CACTCCGCTATCGCTACGTGACTGGGTGATGGCTGCGCCCCGACACCCGCCAACACCCGCTGACGCGCCC  
TGACGGGCTTGTCTGCTCCCGCATCCGCTTACAGACAAGCTGTGACCGTCTCCGGGAGCTGCATGTGTC  
AGAGGTTTTACCGTTCATACCGAAACGCGCGAGGCAGGGTGCCTTGATGTGGGCGCCGCGGTGAGTG  
GCGACGCGCGGCTTGTCGCGCCCTGGTAGATTGCCTGGCCGTAGGCCAGCCATTTTTGAGCGGCCAGC  
GGCCGCGATAGGCCGACGCGAAGCGGCGGGCGTAGGGAGCGCAGCGACCGAAGGGTAGGCGCTTTTTGC  
AGCTCTTCGGCTGTGCGCTGGCCAGACAGTTATGCACAGGCCAGGCGGGTTTTAAGAGTTTTAATAAGTT  
TTAAAGAGTTTTAGGCGGAAAAATCGCCTTTTTTCTCTTTTATATCAGTCACTTACATGTGTGACCGGTT  
CCCAATGTACGGCTTTGGGTTCCTAATGTACGGGTTCGGTTCCCAATGTACGGCTTTGGGTTCCTAATG  
TACGTGCTATCCACAGGAAAGAGACCTTTTCGACCTTTTCCCCTGCTAGGGCAATTTGCCCTAGCATCT  
GCTCCGTACATTAGGAACCGGCGGATGCTTCGCCCTCGATCAGGTTGCGGTAGCGCATGACTAGGATCGG  
GCCAGCTGCCCCGCTCCTCCTTCAAATCGTACTCCGGCAGGTCAATTGACCCGATCAGCTTGCGCACG  
GTGAAACAGAACTTCTTGAAGCTCTCCGGCGCTGCCACTGCGTTCGTAGATCGTCTTGAACAACCATCTGG  
CTTCTGCCTTGCTGCGGCGCGGCGTGCCAGGCGGTAGAGAAAACGGCCGATGCCGGGATCGATCAAAAA  
GTAATCGGGGTGAACCGTCAGCACGTCCGGGTCTTGCCTTCTGTGATCTCGCGGTACATCCAATCAGCT  
AGCTCGATCTCGATGTACTCCGGCCGCCGGTTTTCGCTCTTTACGATCTTGTAGCGGCTAATCAAGGCTT  
CACCTCGGATACCGTCACAGGCGGCCGTTCTTGGCCTTCTTCGTACGCTGCATGGCAACGTGCGTGGT  
GTTTAACCGAATGCAGGTTTCTACCAGGTCGTCTTTCTGCTTTCCGCCATCGGCTCGCCGGCAGAACTTG  
AGTACGTCCGCAACGTGTGGACGGAACACGCGGCCGGGCTTGTCTCCCTTCCCTTCCCGGTATCGGTTCA  
TGGATTTCGGTTAGATGGGAAACGCCCATCAGTACCAGGTCGTAATCCACACACTGGCCATGCCGGCCGG  
CCCTGCGGAAACCTCTACGTGCCCCTTGGAAAGCTCGTAGCGGATCACCTCGCCAGCTCGTCGGTCACGC  
TTTCGACAGACGGAACCGCCACGTCCATGATGCTGCGACTATCGCGGGTGCCACGTATAGAGCATCG  
GAACGAAAAAATCTGGTTGCTCGTCGCCCTTGGGCGGCTTCCTAATCGACGGCGCACCGGCTGCCGGCGG



TTGCCGGGATTCTTTGCGGATTTCGATCAGCGGCCGCTTGCCACGATTACCGGGGCGTGCTTCTGCCTCG  
ATGCGTTGCCGCTGGGCGGCCGTGCGCGGCCCTTCAACTTCTCCACCAGGTCATCACCCAGCGCCGCGCCGA  
TTTGTACCGGGCCGGATGGTTTTCGACCGTACGCCGATTTCCTCGGGCTTGGGGGTTCCAGTGCCATTGC  
AGGGCCGGCAGACAACCCAGCCGCTTACGCCTGGCCAACCGCCCGTTCCCTCCACACATGGGGCATTCCAC  
GGCGTCGGTGCCTGGTTGTTCTTGATTTTCCATGCCGCCCTCCTTTAGCCGCTAAAATTCATCTACTCATT  
TATTCATTTGCTCATTTACTCTGGTAGCTGCGCGATGTATTTCAGATAGCAGCTCGGTAATGGTCTTGCCT  
TGGCGTACCGCGTACATCTTCAGCTTGGTGTGATCCTCCGCCGGCAACTGAAAGTTGACCCGCTTCATGG  
CTGGCGTGTCTGCCAGGCTGGCCAACGTTGCAGCCTTGTGCTGCGTGCCTCGGACGGCCGGCACTTAG  
CGTGTTTGTGCTTTTGTCTCATTTTCTCTTTACCTCATTAACCTCAAATGAGTTTTGATTTAATTTACGCGG  
CCAGCGCCTGGACCTCGCGGGCAGCGTCGCCCTCGGGTTCTGATTCAAGAACGGTTGTGCCGGCGGCGGC  
AGTGCTTGGGTAGCTCAGCGCTGCGTGATACGGGACTCAAGAATGGGCAGCTCGTACCCGGCCAGCGCC  
TCGGCAACCTCACCGCCGATGCGCGTGCCTTTGATCGCCCGGACACGACAAAGGCCGCTTGTAGCCTTC  
CATCCGTGACCTCAATGCGCTGCTTAACCAGCTCCACCAGGTGGCGGTGGCCCATATGTCGTAAGGGCT  
TGGCTGCACCGGAATCAGCACGAAGTCGGCTGCCTTGATCGCGGACACAGCCAAGTCCGCCGCTTGGGGC  
GCTCCGTCGATCACTACGAAGTCGCGCCGGCCGATGGCCTTCACGTGCGGGTCAATCGTCGGGCGGTGCGA  
TGCCGACAACGGTTAGCGGTGATCTTCCCGCACGGCCGCCAATCGCGGGCACTGCCCTGGGGATCGGA  
ATCGACTAACAGAACATCGGCCCCGGCGAGTTGCAGGGCGCGGGCTAGATGGGTGCGATGGTCTGCTTG  
CCTGACCCGCTTTTCTGGTTAAGTACAGCGATAACCTTCATGCGTTCCCTTGCGTATTTGTTTATTAC  
TCATCGCATCATATACGCAGCGACCGCATGACGCAAGCTGTTTTACTCAAATACACATCACCTTTTTAGA  
CGGCGGCGCTCGGTTTCTTCAGCGGCCAAGCTGGCCGGCCAGGCCGCCAGCTTGGCATCAGACAAACCGG  
CCAGGATTTTCATGCAGCCGACGGTTGAGACGTGCGCGGGCGGCTCGAACACGTACCCGGCCGCGATCAT  
CTCCGCCTCGATCTCTTCGGTAATGAAAAACGGTTTCGTCTTGGCCGTCTTGGTGCGGTTTCATGCTTGTT  
CCTCTTGGCGTTTCATCTCGGCGGCCGCCAGGGCGTCGGCTCGGTCAATGCGTCCTCACGGAAGGCACC  
GCGCCGCTTGGCCTCGGTGGGCGTCACTTCCTCGCTGCGCTCAAGTGC CGGTACAGGGTCGAGCGATGC  
ACGCCAAGCAGTGCAGCCGCTCTTTACGGTGC GGCTTCCTGGTCGATCAGCTCGCGGCGGTGCGCGA  
TCTGTGCCGGGGTGAGGGTAGGGCGGGGGCCAACTTCACGCCTCGGGCCTTGGCGGCCCTCGCGCCCGCT  
CCGGGTGCGGTGCGATGATTAGGGAACGTCGAACTCGGCAATGCCGGCGAACACGGTCAACACCATGCGG  
CCGGCCGGCGTGGTGGTGTGCGGCCACGGCTCTGCCAGGCTACGAGGCCCGCGCGGCCCTCTGGATGC  
GCTCGGCAATGTCCAGTAGGTGCGGGTGCTGCGGGCCAGGCGGTCTAGCCTGGTCACTGTCACAACGTC  
GCCAGGGCGTAGGTGGTCAAGCATCCTGGCCAGCTCCGGCGGTGCGGCCTGGTGCCGGTGATCTTCTCG  
GAAAACAGCTTGGTGCAGCCGGCCGCGTGCAGTTCGGCCCGTTGGTTGGTCAAGTCTGGTTCGTGCGTGC  
TGACGCGGGCATAGCCAGCAGGCCAGCGCGGCGCTCTTGTTTCATGGCGTAATGTCTCCGGTTCTAGTC  
GCAAGTATTCTACTTTATGCGACTAAAACACGCGACAAGAAAACGCCAGGAAAAGGGCAGGGCGGCAGCC  
TGTCGCGTAACCTTAGGACTTGTGCGACATGTGTTTTTCAAGAAGCGGTGCACTGAACGTCAGAAGCCGA  
CTGCACTATAGCAGCGGAGGGGTTGGATCAAAGTACTTTGATCCCGAGGGGAACCCTGTGGTTGGCATGC  
ACATACAAATGGACGAACGGATAAACCTTTTCACGCCCTTTTAAATATCCGTTATTCTAATAAACGCTCT  
TTTCTCTTAGGTTTACCCGCCAATATATCCTGTCAAACACTGATAGTTTAAACTGAAGCGGGAAACGAC  
AATCTGATCCAAGCTCAAGCTAAGCTTGAGCTCTGCATGCCTGCAGGTCCCCAGATTAGCCTTTTCAATT  
TCAGAAAGAAATGCTAACCCACAGATGGTTAGAGAGGCTTACGCAGCAGGTCTCATCAAGACGATCTACCC  
GAGCAATAATCTCCAGGAAATCAAATACCTTCCCAAGAAGGTTAAAGATGCAGTCAAAAGATTTCAGGACT  
AACTGCATCAAGAACACAGAGAAAGATATATTTCTCAAGATCAGAAGTACTATTCCAGTATGGACGATTC  
AAGGCTTGCTTCACAAACCAAGGCAAGTAATAGAGATTGGAGTCTCTAAAAAGGTAGTTCCCACTGAATC  
AAAGGCCATGGAGTCAAAGATTCAAATAGAGGACCTAACAGAACTCGCCGTAAAGACTGGCGAACAGTTCT  
ATACAGAGTCTCTTACGACTCAATGACAAGAAGAAAATCTTCGTCAACATGGTGGAGCACGACACACTTG

TCTACTCCAAAAATATCAAAGATACAGTCTCAGAAGACCAAAGGGCAATTGAGACTTTTCAACAAAGGGT  
AATATCCGGAAACCTCCTCGGATTCCATTGCCCAGCTATCTGTCACTTTATTGTGAAGATAGTGGAAAAG  
GAAGGTGGCTCCTACAAATGCCATCATTGCGATAAAGGAAAAGGCCATCGTTGAAGATGCCTCTGCCGACA  
GTGGTCCCAAAGATGGACCCCCACCCACGAGGAGCATCGTGAAAAAGAAGACGTTCCAACCACGTCTTC  
AAAGCAAGTGGATTGATGTGATATCTCCACTGACGTAAGGGATGACGCACAATCCCACTATCCTTCGCAA  
GACCCTTCTCTATATAAGGAAGTTCATTTTCATTTGGAGAGAACACGGGGGACTCTAGAGGATCCAAGGA  
GATATAAGCCGCCACCATGGATTACAAGGACGATGATGACAAGGACTACAAGGACGATGACGATAAGGAC  
TATAAGGATGACGATGACAAGGATTACGCCGAGGCCTGTCGACCTGCAGACTGGCTGTGTATAAGGGAGC  
CTGACATTTATATTCCCCAGAACATCAGGTTAATGGCGTTTTTTGATGTCACTTTTCGCGGTGGCTGAGATC  
AGCCACTTCTTCCCCGATAACGGAGACCGGCACACTGGCCATATCGGTGGTCATCATGCGCCAGCTTTTCA  
TCCCCGATATGCACCACCGGGTAAAGTTCACGGGAGACTTTATCTGACAGCAGACGTGCACTGGCCAGGG  
GGATCACCATCCGTCGCCCGGGCGTGTCAATAATCACTCTGTACATCCACAAACAGACGATAACGGCT  
CTCTCTTTTATAGGTGTAAACCTTAACTGCATTTTACCAGCCCCTGTTCTCGTCAGCAAAAAGAGCCGTT  
CATTTCAATAAAACCGGGCGACCTCAGCCATCCCTTCCTGATTTTCCGCTTTCAGCGTTCGGCACGCAGA  
CGACGGGCTTCATTCTGCATGGTTGTGCTTACCAGACCGGAGATATTGACATCATATATGCCTTGAGCAA  
CTGATAGCTGTGCTGTCAACTGTCACTGTAATACGCTGCTTCATAGCATACCTCTTTTTGACATACTTC  
GGGTATACATATCAGTATATATTCTTATACCGCAAAAATCAGCGCGCAAAATACGCATACTGTTATCTGGC  
TTTTAGTAAGCCGATCCACGCGTTTACGCCCCGCCCTGCCACTCATCGCAGTACTGTTGTAATTCATTA  
AGCATTCTGCCGACATGGAAGCCATCACAGACGGCATGATGAACCTGAATCGCCAGCGGCATCAGCACCT  
TGTCGCCTTGCGTATAATATTTGCCCATGGTGAAAACGGGGGCGAAGAAGTTGTCCATATTGGCCACGTT  
TAAATCAAAACTGGTGAAACTCACCAGGGATTGGCTGAGACGAAAAACATATTCTCAATAAAACCTTTA  
GGGAAATAGGCCAGGTTTTTACCAGTAACACGCCACATCTTGCGAATATATGTGTAGAAACTGCCGAAAT  
CGTCGTGGTATTCACTCCAGAGCGATGAAAACGTTTCAGTTTGCTCATGGAAAACGGTGTAACAAGGGTG  
AACACTATCCCATATCACCAGCTCACCCTCTTTCATTGCCATACGGAATTCGGATGAGCATTCATCAGG  
CGGGCAAGAATGTGAATAAAGCCGGATAAAACTTGTGCTTATTTTTCTTTACGGTCTTTAAAAAGGCCG  
TAATATCCAGCTGAACGGTCTGGTTATAGGTACATTGAGCAACTGACTGAAATGCCTCAAAATGTTCTTT  
ACGATGCCATTGGGATATATCAACGGTGGTATATCCAGTGATTTTTTTCTCCATTTTAGCTTCCTTAGCT  
CCTGAAAATCTCGCCGATCCTAACTCAAAATCCACACATTATACGAGCCGGAAGCATAAAGTGTAAGC  
CTGGGGTGCCTAATGCGGCCGAGGCCTCTTCCCTAATGATATCCCGCGCCATGCTAGAGTCCGCAAAA  
ATCACCAGTCTCTCTTACAAATCTATCTCTCTATTTTTCTCCAGAATAATGTGTGAGTAGTTCAG  
ATAAGGAATTAGGGTTCTTATAGGGTTTCGCTCATGTGTTGAGCATATAAGAAACCCTTAGTATGTATT  
TGTATTTGTAAAATACTTCTATCAATAAAATTTCTAATTCCTAAAACCAAAATCCAGTGACCTGCAGGCA  
TGCGACGTCG

### Sequence of pH7LIC3.1.1-p23M1 (35S- p23M1)

GGGTACCCTCGAATTATCATACATGAGAATTAAGGGAGTCACGTTATGACCCCGCCGATGACGCGGGACA  
AGCCGTTTTACGTTTGAACTGACAGAACCGCAACGTTGAAGGAGCCACTGAGCCGCGGTTTTCTGGAGT  
TTAATGAGCTAAGCACATACGTGAGAAACCATTATTGCGCGTTCAAAAGTCGCCTAAGGTCATATCAGC  
TAGCAAAATATTTCTTGTCAAAAATGCTCCACTGACGTTCCATAAATTCCTTCGGTATCCAATTAGAGTC  
TCATATTTCACTCTCAACTCGAATCCCCCTATGAAAAAGCCTGAACTCACCGCGACGTCTGTGAGAAGT  
TTCTGATCGAAAAGTTCGACAGCGTCTCCGACCTGATGCAGCTCTCGGAGGGCGAAGAATCTCGTGCTTT  
CAGCTTCGATGTAGGAGGGCGTGGATATGTCTGCGGGTAAATAGCTGCGCCGATGGTTTTCTACAAAGAT  
CGTTATGTTTATCGGCACTTTGCATCGGCCGCGCTCCCGATTCCGGAAGTGCTTGACATTGGGGAGTTCA  
GCGAGAGCCTGACCTATTGCATCTCCGCGCGTGCACAGGGTGTACGTTGCAAGACCTGCCTGAAACCGA

ACTGCCCGCTGTTCTTCAGCCGGTCGCGGAGGCTATGGATGCTATCGCTGCGGCCGATCTTAGCCAGACG  
AGCGGGTTCGGCCCATTTCGGACCGCAAGGAATCGGTCAATACACTACATGGCGTGATTTTCATATGCGCGA  
TTGCTGATCCCCATGTGTATCACTGGCAAACGTGTGATGGACGACACCGTCAGTGCGTCCGTCGCGCAGGC  
TCTCGATGAGCTGATGCTTTGGGCGAGGACTGCCCCGAAGTCCGGCACTCGTGACGCGGATTTCGGCTCC  
AACAAATGTCTGACGGACAATGGCCGCATAACAGCGGTCAATTGACTGGAGCGAGGCGATGTTTCGGGGATT  
CCCAATACGAGGTCGCCAACATCTTCTTCTGGAGGCCGTGGTTGGCTTGATGGAGCAGCAGACGCGCTA  
CTTCGAGCGGAGGCATCCGGAGCTTGCAGGATCGCCAAGGCTCCGGGCGTATATGCTCCGCATTGGTCTT  
GACCAACTCTATCAGAGCTTGGTTGACGGCAATTTTCGATGATGCAGCTTGGGCGCAGGGTCGATGCGACG  
CAATCGTCCGATCCGGAGCCGGGACTGTCTGGGCGTACACAAATCGCCCGCAGAAGCGCGGCCGTCTGGAC  
CGATGGCTGTGTAGAAGTACTCGCCGATAGTGAAACCGACGCCCCAGCACTCGTCCGAGGGCAAAGGAA  
TAGAGTAGATGCCGACCGAACAAGAGCTGATTTTCGAGAACGCCTCAGCCAGCAACTCGCGCGAGCCTAGC  
AAGGCAAATGCGAGAGAACGGCCTTACGCTTGGTGGCACAGTTCTCGTCCACAGTTCGCTAAGCTCGCTC  
GGCTGGGTTCGCGGAGGGCCGGTTCGAGTGATTTCAGGAATTAATTCCTTAGAGTCAAGCAGATCGTTCAA  
ACATTTGGCAATAAAGTTTCTTAAGATTGAATCCTGTTGCCGGTCTTGCGATGATTATCATATAATTTCT  
GTTGAATTACGTTAAGCATGTAATAATTAACATGTAATGCATGACGTTATTTATGAGATGGGTTTTTATG  
ATTAGAGTCCCGCAATTATACATTTAATACGCGATAGAAAACAAAATATAGCGCGCAAACCTAGGATAAAT  
TATCGCGCGCGGTGTATCTATGTTACTAGATCGACCGCATGCAAGCTGATAATTCAATTTCGGCGTTAA  
TTCAGTACATTAAAAACGTCCGCAATGTGTTATTAAGTTGTCTAAGCGTCAATTTGTTTACACCACAATA  
TATCCTGCCACCAGCCAGCCAACAGCTCCCCGACCGGCAGCTCGGCACAAAATCACCCTCGATACAGGC  
AGCCCATCAGTCCGGGACGGCGTCAGCGGGAGAGCCGTTGTAAGGCGGCAGACTTTGCTCATGTTACCGA  
TGCTATTTCGAAGAACGGCAACTAAGCTGCCGGGTTTGAACACGGATGATCTCGCGGAGGGTAGCATGT  
TGATTGTAACGATGACAGAGCGTTGCTGCCTGTGATCAATTTCGGGCACGAACCCAGTGACATAAGCCTC  
GTTCCGTTTCGTAAGCTGTAATGCAAGTAGCGTAACCTGCCGTACGCAACTGGTCCAGAACCTTGACCGAA  
CGCAGCGGTGGTAACGGCGCAGTGGCGGTTTTTCATGGCTTCTTGTTATGACATGTTTTTTTTGGGGTACAG  
TCTATGCCTCGGGCATCCAAGCAGCAAGCGGTTACGCCGTGGGTCGATGTTTGATGTTATGGAGCAGCA  
ACGATGTTACGCAGCAGGGCAGTCGCCCTAAAACAAAGTTAAACATCATGGGGGAAGCGGTGATCGCCGA  
AGTATCGACTCAACTATCAGAGGTAGTTGGCGTCATCGAGCGCCATCTCGAACCGACGTTGCTGGCCGTA  
CATTTGTACGGCTCCGCACTGGATGGCGGCCTGAAGCCACACAGTGATATTGATTTGCTGGTTACGGTGA  
CCGTAAGGCTTGATGAAACAACGCGGCAGCTTTGATCAACGACCTTTTGAAACTTCGGCTTCCCCTGG  
AGAGAGCGAGATTCTCCGCGCTGTAGAAGTCACCATTTGTTGTGCACGACGACATCATTCGCTGGCGTTAT  
CCAGCTAAGCGCGAACTGCAATTTGGAGAATGGCAGCGCAATGACATTTCTGCAGGTATCTTCGAGCCAG  
CCACGATCGACATTGATCTGGCTATCTTGCTGACAAAAGCAAGAGAACATAGCGTTGCCTTGGTAGGTCC  
AGCGGCGGAGGAACTCTTTGATCCGTTCTTGAACAGGATCTATTTGAGGCGCTAAATGAAACCTTAACG  
CTATGGAACCTCGCCGCCGACTGGGCTGGCGATGAGCGAAATGTAGTGCTTACGTTGTCCCGCATTTGGT  
ACAGCGCAGTAACCGGCAAAAATCGCGCCGAAGGATGTCGCTGCCGACTGGGCAATGGAGCGCCTGCCGGC  
CCAGTATCAGCCCGTCATACTTGAAGCTAGACAGGCTTATCTTGACAGAAGAAGATCGCTTGGCCTCG  
CGCGCAGATCAGTTGGAAGAATTTGTCCACTACGTGAAAGCGAGATCACCAAGGTAGTCGGCAAATAAT  
GTCTAGCTAGAAATTCGTTCAAGCCGACGCCGCTTCGCCGGCGTTAACTCAAGCGATTAGATGCACTAAG  
CACATAATTGCTCACAGCCAACTATCAGGTCAAGTCTGCTTTTATTATTTTAAAGCGTGACATAATAAGC  
CCTACACAAATTGGGAGATATATCATGCATGACCAAAATCCCTTAACGTGAGTTTTTCGTTCCACTGAGCG  
TCAGACCCCGTAGAAAAGATCAAAGGATCTTCTTGAGATCCTTTTTTTCTGCGCGTAATCTGCTGCTTGC  
AAACAAAAAAACCACCGCTACCAGCGGTGGTTTGTGTTGCCGGATCAAGAGCTACCAACTCTTTTTCCGAA  
GGTAACTGGCTTCAGCAGAGCGCAGATACCAAATACTGTCTTCTAGTGTAGCCGTAGTTAGGCCACCAC  
TTCAAGAACTCTGTAGCACCGCTACATACCTCGCTCTGCTAATCCTGTTACCAGTGGCTGCTGCCAGTG

GCGATAAGTCGTGTCTTACCGGGTTGGACTCAAGACGATAGTTACCGGATAAGGCGCAGCGGTCTGGGCTG  
AACGGGGGGTTTCGTGCACACAGCCCAGCTTGGAGCGAACGACCTACACCGAACTGAGATACCTACAGCGT  
GAGCTATGAGAAAGCGCCACGCTTCCCCGAAGGGAGAAAGGCGGACAGGTATCCGGTAAGCGGCAGGGTCG  
GAACAGGAGAGCGCACGAGGGAGCTTCCAGGGGGAACGCCTGGTATCTTTATAGTCCTGTCTGGGTTTTCG  
CCACCTCTGACTTGAGCGTCGATTTTTGTGATGCTCGTCAGGGGGCGGAGCCTATGGAAAAACGCCAGC  
AACGCGGCCTTTTTACGGTTTCTGGCCTTTTGCTGGCCTTTTGCTCACATGTTCTTTCTGCGTTATCCC  
CTGATTCTGTGGATAACCGTATTACCGCCTTTGAGTGAGCTGATACCGCTCGCCGCAGCCGAACGACCGA  
GCGCAGCGAGTCAGTGAGCGAGGAAGCGGAAGAGCGCCTGATGCGGTATTTTCTCCTTACGCATCTGTGC  
GGTATTTTACACCGCATATGGTGCACTCTCAGTACAATCTGCTCTGATGCCGCATAGTTAAGCCAGTATA  
CACTCCGCTATCGCTACGTGACTGGGTCTGGCTGCGCCCCGACACCCGCCAACACCCGCTGACGCGCCC  
TGACGGGCTTGTCTGCTCCCGGCATCCGCTTACAGACAAGCTGTGACCGTCTCCGGGAGCTGCATGTGTC  
AGAGGTTTTACCGTCACTACCGAAACGCGCGAGGCAGGGTGCCTTGATGTGGGCGCCGGCGGTCTGAGTG  
GCGACGGCGCGGCTTGTCCGCGCCCTGGTAGATTGCCTGGCCGTAGGCCAGCCATTTTTGAGCGGCCAGC  
GGCCGCGATAGGCCGACGCGAAGCGCGGGGCGTAGGGAGCGCAGCGACCGAAGGGTAGGCGCTTTTTGCG  
AGCTCTTCGGCTGTGCGCTGGCCAGACAGTTATGCACAGGCCAGGCGGGTTTTAAGAGTTTTAATAAGTT  
TTAAAGAGTTTTAGGCGGAAAAATCGCCTTTTTTCTCTTTTATATCAGTCACTTACATGTGTGACCGGTT  
CCCAATGTACGGCTTTGGGTTCCCAATGTACGGGTTCCGCTTCCCAATGTACGGCTTTGGGTTCCCAATG  
TACGTGCTATCCACAGGAAAGAGACCTTTTCGACCTTTTCCCTGCTAGGGCAATTTGCCCTAGCATCT  
GCTCCGTACATTAGGAACCGGCGGATGCTTCGCCCTCGATCAGGTTGCGGTAGCGCATGACTAGGATCGG  
GCCAGCCTGCCCCGCTCCTCCTTCAAATCGTACTCCGGCAGGTCAATTTGACCCGATCAGCTTGCGCACG  
GTGAAACAGAACTTCTTGAACCTCTCCGGCGCTGCCACTGCGTTCTGTAGATCGTCTTGAACAACCATCTGG  
CTTCTGCCTTGCTGCGGCGCGGCGTGCCAGGCGGTAGAGAAAACGGCCGATGCCGGGATCGATCAAAAA  
GTAATCGGGGTGAACCGTCAGCACGTCCGGGTCTTGCCTTCTGTGATCTCGCGGTACATCCAATCAGCT  
AGCTCGATCTCGATGTACTCCGGCCGCCGGTTTCGCTCTTTACGATCTTGTAGCGGCTAATCAAGGCTT  
CACCTTCGGATACCGTCACCAGGCGGCCGTTCTTGGCCTTCTTCGTACGCTGCATGGCAACGTGCGTGGT  
GTTTAACCGAATGCAGGTTTCTACCAGGTCTCTTTCTGCTTTCCGCCATCGGCTCGCCGGCAGAACTTG  
AGTACGTCCGCAACGTGTGGACGGAACACGCGGCCGGGCTTGTCTCCCTTCCCTTCCCGGTATCGGTTCA  
TGGATTTCGGTTAGATGGGAAACCGCCATCAGTACCAGGTCGTAATCCCACACACTGGCCATGCCGGCCGG  
CCCTGCGGAAACCTCTACGTGCCCCTGCTGGAAGCTCGTAGCGGATCACCTCGCCAGCTCGTCGGTCACGC  
TTCGACAGACGGAACCGGCCACGTCCATGATGCTGCGACTATCGCGGGTGCCACGTCTAGAGCATCG  
GAACGAAAAAATCTGGTTGCTCGTCGCCCTTGGGCGGCTTCCTAATCGACGGCGCACCGGCTGCCGGCGG  
TTGCCGGGATTCTTTGCGGATTCGATCAGCGGCCGCTTGCCACGATTACCGGGGCGTGCTTCTGCCTCG  
ATGCGTTGCCGCTGGGCGGCCTGCGCGGCTTCAACTTCTCCACCAGGTCATACCCAGCGCCGCGCCGA  
TTTGTACCGGGCCGGATGGTTTTCGACCGCTCACGCCGATTCCTCGGGCTTGGGGGTTCCAGTGCCATTGC  
AGGGCCGGCAGACAACCCAGCCGCTTACGCCTGGCCAACCGCCGTTCTCCACACATGGGGCATTCCAC  
GGCGTCGGTGCTGGTTGTCTTGATTTTCCATGCCGCTCCTTTAGCCGCTAAAATTCATCTACTCATT  
TATTCAATTTGCTCATTTACTCTGGTAGCTGCGCGATGTATTCAGATAGCAGCTCGGTAATGGTCTTGCCCT  
TGGCGTACCGGTACATCTTACGCTTGGTGTGATCTCCGCCGGCAACTGAAAGTTGACCCGCTTCATGG  
CTGGCGTGTCTGCCAGGCTGGCCAACGTTGCAGCCTTGCTGCTGCGTGCGCTCGGACGGCCGGCACTTAG  
CGTGTTTGTGCTTTTGCTCATTTTCTCTTTACCTCATTAACCTCAAATGAGTTTTGATTTAATTTACGCGG  
CCAGCGCTTGACCTCGCGGGCAGCGTCGCCCTCGGGTTCTGATTCAAGAACGGTTGTGCCGGCGGCGGC  
AGTGCCCTGGGTAGCTCACGCGCTGCGTGATACGGGACTCAAGAATGGGCAGCTCGTACCCGGCCAGCGCC  
TCGGCAACCTCACCGCCGATGCGCGTGCTTTGATCGCCCGGACACGACAAAGGCCGCTTGTAGCCTTC  
CATCCGTGACCTCAATGCGCTGCTTAACCAGCTCCACCAGGTCGGCGGTGGCCCATATGTCGTAAGGGCT

TGGCTGCACCGGAATCAGCACGAAGTCGGCTGCCTTGATCGCGGACACAGCCAAGTCCGCCGCCTGGGGC  
GCTCCGTCGATCACTACGAAGTCGCGCCGGCCGATGGCCTTCACGTCGCGGTCAATCGTCGGGCGGTCTGA  
TGCCGACAACGGTTAGCGGTTGATCTTCCCGCACGGCCGCCAATCGCGGGCACTGCCCTGGGGATCGGA  
ATCGACTAACAGAACATCGGCCCCGGCGAGTTGCAGGGCGCGGGCTAGATGGGTTGCGATGGTCGTCTTG  
CCTGACCCGCCTTTCTGGTTAAGTACAGCGATAACCTTCATGCGTTCCCCTTGCGTATTTGTTTATTAC  
TCATCGCATCATATACGCAGCGACCGCATGACGCAAGCTGTTTTACTCAAATACACATCACCTTTTTAGA  
CGGCGGCGCTCGGTTTTCTTCAGCGGCCAAGCTGGCCGGCCAGGCCGCCAGCTTGGCATCAGACAAACCGG  
CCAGGATTTTCATGCAGCCGCACGGTTGAGACGTGCGCGGGCGGCTCGAACACGTACCCGGCCGCGATCAT  
CTCCGCCTCGATCTCTTCGGTAATGAAAAACGGTTTCGTCTGGCCGTCCTGGTGCGGTTTCATGCTTGTT  
CCTCTTGCGGTTTCATTCTCGGCGGCCGCCAGGGCGTCGGCTCGGTCAATGCGTCTCACGGAAGGCACC  
GCGCCGCTGGCCTCGGTGGGCGTCACTTCCTCGCTGCGCTCAAGTGC CGGTACAGGGTCGAGCGATGC  
ACGCCAAGCAGTGCAGCCGCTCTTTCACGGTGCGGCCTTCCTGGTCGATCAGCTCGCGGGCGTGCGGA  
TCTGTGCCGGGTGAGGGTAGGGCGGGGCCAAACTTCACGCCTCGGGCCTTGGCGGCCTCGCGCCCGCT  
CCGGGTGCGGTGATGATTAGGGAACGCTCGAACTCGGCAATGCCGGCGAACACGGTCAACACCATGCGG  
CCGGCCGGCGTGGTGGTGTCGGCCACGGCTCTGCCAGGCTACGCAGGCCCGCGCCGGCCTCCTGGATGC  
GCTCGGCAATGTCCAGTAGGTGCGGGTGCTGCGGGCCAGGCGGTCTAGCCTGGTCACTGTCACAACGTC  
GCCAGGGCGTAGGTGGTCAAGCATCCTGGCCAGCTCCGGCGGTGCGGCCTGGTGCCGGTGATCTTCTCG  
GAAAACAGCTTGGTGACGCCGGCCGCGTGACGTTGCGCCCGTTGGTTGGTCAAGTCTGGTCGTGCGTG  
TGACGCGGGCATAGCCCAGCAGGCCAGCGGCGGCGCTCTGTTTCATGGCGTAATGTCTCCGGTTCTAGTC  
GCAAGTATTCTACTTTATGCGACTAAAACACGCGACAAGAAAACGCCAGGAAAAGGGCAGGGCGGCAGCC  
TGTCGCGTAACCTTAGGACTTGTGCGACATGTGTTTTTCAAGACGGCTGCACTGAACGTGAGAAGCCGA  
CTGCACTATAGCAGCGAGGGGTTGGATCAAAGTACTTTGATCCCAGGGGAACCCTGTGGTTGGCATGC  
ACATACAAATGGACGAACGGATAAACCTTTTCACGCCCTTTTAAATATCCGTTATTCTAATAAACGCTCT  
TTTCTCTTAGGTTTACCCGCCAATATATCTGTCAAACACTGATAGTTTAAACTGAAGGCGGGAAACGAC  
AATCTGATCCAAGCTCAAGCTAAGCTTGAGCTCTGCATGCCTGCAGGTCCCCAGATTAGCCTTTTCAATT  
TCAGAAAGAATGCTAACCACAGATGGTTAGAGAGGCTTACGCAGCAGGTCTCATCAAGACGATCTACCC  
GAGCAATAATCTCCAGGAAATCAAATACCTTCCCAAGAAGGTTAAAGATGCAGTCAAAAGATTTCAGGACT  
AACTGCATCAAGAACACAGAGAAAGATATATTTCTCAAGATCAGAAGTACTATTCCAGTATGGACGATTC  
AAGGCTTGCTTCACAAACCAAGGCAAGTAATAGAGATTGGAGTCTCTAAAAAGGTAGTTCCCACTGAATC  
AAAGGCCATGGAGTCAAAGATTCAAATAGAGGACCTAACAGAACTCGCCGTAAAGACTGGCGAACAGTTC  
ATACAGAGTCTCTTACGACTCAATGACAAGAAGAAAATCTTCGTCAACATGGTGAGACGACACACTTG  
TCTACTCCAAAAATATCAAAGATACGTCTCAGAAGACCAAAGGGCAATTGAGACTTTTCAACAAAGGT  
AATATCCGGAAACCTCCTCGGATTCCATTGCCCAGCTATCTGTCACTTTATTGTGAAGATAGTGGAAAAG  
GAAGGTGGCTCCTACAAATGCCATCATTGCGATAAAGGAAAGGCCATCGTTGAAGATGCCTCTGCCGACA  
GTGGTCCCAAAGATGGACCCCCACCCACGAGGAGCATCGTGAAAAAGAAGACGTTCCAACCACGTCTTC  
AAAGCAAGTGGATTGATGTGATATCTCCACTGACGTAAGGGATGACGCACAATCCCACTATCCTTCGCAA  
GACCTTCTCTATATAAGGAAGTTCAATTTCAATTTGGAGAGAACACGGGGGACTCTAGAGGATCCAAGGA  
GATATAAGCCGCCACCATGGATTACAAGGACGATGATGACAAGGACTACAAGGACGATGACGATAAGGAC  
TATAAGGATGACGATGACAAGGATTACGCCGAGGATGGATGATACTAGCGGACAACTTTCGTTTCTGTG  
AACCTTTCTGACGAAAGCAACACGGCAAGCACTAAAGTTGAAAACGTAAAATCGGAAGCGGATCGCTTGG  
AGTTTTTACGTAAAATGAATCCCTTTATTGTTGACGCTCTGGTGCGGAAAACCAATTATCAGGGTGCTCG  
CTTTCGCGCAAGAATAATAGGAGTGTCGTGGATTGTGGTAGAGCGGCGACAAGGCGCTCAAGACTGAA  
CGTAAGTGTAAGGTCAACAACACGCAATCTCAGAACGAGGTGGCGCATATGTTGATGCACGATCCCGTTA  
AGTATTTGAACAAAAGAAAGGCTAGAGCCTTTTCTAACGCAGAGATGTTTGCGATTGAAGTGGTTTCGTA

CACCAAGGAAAGGCAATTGGCGGTCGATTTAGCCGCTGAAAGGGAGAAGACGAGACTGGCTCGTAGACAC  
CCAATACGTTCTCCGGAAGAACTCCGGAACATTATAAATTCGGTATGACTGCTAAGGCAATGTTACCGG  
ACATCAACGCCGTAGACGTTGGTGATAACGAGGAACTTCGTCGGAGTACCCAGTGAGTCTGAGTGTTTC  
TGGCGGAGTTCTCCGTGAACACCACTTCATCTGACCTCTTCCCTAATGATATCCCGCGGCCATGCTAGAG  
TCCGCAAAAATCACCAGTCTCTCTCTACAAATCTATCTCTCTATTTTTCTCCAGAATAATGTGTGAGT  
AGTTCCAGATAAGGGAATTAGGGTTCTTATAGGGTTTCGCTCATGTGTTGAGCATATAAGAAACCCTTA  
GTATGTATTTGTATTTGTAAAATACTTCTATCAATAAAATTTCTAATTCCTAAAACCAAAATCCAGTGAC  
CTGCAGGCATGCGACGTCG

### **Sequence of pH7LIC3.1.1-p23M2 (35S- p23M2)**

GGGTACCCCTGAATTATCATACATGAGAATTAAGGGAGTCACGTTATGACCCCGCCGATGACGCGGGACA  
AGCCGTTTTACGTTTGGAAGTACAGAACCGCAACGTTGAAGGAGCCACTGAGCCGCGGGTTTCTGGAGT  
TTAATGAGCTAAGCACATACGTCAGAAACCATTATTGCGCGTTCAAAGTCGCCTAAGGTCATATCAGC  
TAGCAAATATTTCTTGTCAAAATGCTCCACTGACGTTCCATAAATCCCCCTCGGTATCCAATTAGAGTC  
TCATATTCCTCTCAACTCGAATCCCCCTATGAAAAAGCCTGAACCTACCGCGACGTCTGTGAGAAGT  
TTCTGATCGAAAAGTTCGACAGCGTCTCCGACCTGATGCAGCTCTCGGAGGGCGAAGAATCTCGTGCTTT  
CAGCTTCGATGTAGGAGGGCGTGATATGTCTGCGGGTAAATAGCTGCGCCGATGGTTTCTACAAAGAT  
CGTTATGTTTATCGGCACTTTGCATCGGCCGCGCTCCCGATTCCGGAAGTGCTTGACATTGGGGAGTTCA  
GCGAGAGCCTGACCTATTGCATCTCCCGCCGTGCACAGGGTGTCACGTTGCAAGACCTGCCTGAAACCGA  
ACTGCCCGCTGTTCTTCAGCCGGTCGCGGAGGCTATGGATGCTATCGCTGCGGCCGATCTTAGCCAGACG  
AGCGGGTTTCGGCCCATTCGGACCGCAAGGAATCGGTCAATACACTACATGGCGTGATTTTCATATGCGCGA  
TTGCTGATCCCCATGTGTATCACTGGCAAAGTGTGATGGACGACACCGTCAGTGCGTCCGTGCGCAGGC  
TCTCGATGAGCTGATGCTTTGGGCGAGGACTGCCCGAAGTCCGGCACTCGTGACGCGGGATTTCGGCTCC  
AACAATGTCTGACGGACAATGGCCGCATAACAGCGGTCAATTGACTGGAGCGAGGCGATGTTTCGGGGATT  
CCCAATACGAGGTCGCCAACATCTTCTTCTGAGGCGGTGGTTGGCTTGATGGAGCAGCAGACGCGCTA  
CTTCGAGCGGAGGCATCCGGAGCTTGCAAGGATCGCCAAGGCTCCGGGCGTATATGCTCCGCATTGGTCTT  
GACCAACTCTATCAGAGCTTGTTGACGGCAATTTTCGATGATGCAGCTTGGGCGCAGGGTCGATGCGACG  
CAATCGTCCGATCCGGAGCCGGGACTGTGCGGGGTACACAAATCGCCCGCAGAAGCGCGGCCGTCTGGAC  
CGATGGCTGTGTAGAAGTACTCGCCGATAGTGAAACCGACGCCCCAGCACTCGTCCGAGGGCAAAGGAA  
TAGAGTAGATGCCGACCGAACAAGAGCTGATTTTCGAGAACGCCCTCAGCCAGCAACTCGCGCGAGCCTAGC  
AAGGCAAAATGCGAGAGAACGGCCTTACGCTTGGTGGCACAGTTCTCGTCCACAGTTCGCTAAGCTCGCTC  
GGCTGGGTGCGGGAGGGCCGGTTCGAGTGATTTCAGGAATTAATTCCTTAGAGTCAAGCAGATCGTTCAA  
ACATTTGGCAATAAAGTTTCTTAAGATTGAATCCTGTTGCCGGTCTTGCGATGATTATCATATAATTTCT  
GTTGAATTACGTTAAGCATGTAATAATTAACATGTAATGCATGACGTTATTTATGAGATGGGTTTTTATG  
ATTAGAGTCCCGCAATTATACATTTAATACGCGATAGAAAACAAAATATAGCGCGCAAACCTAGGATAAAT  
TATCGCGCGGGTGTCTATGTTACTAGATCGACCGGCATGCAAGCTGATAATTCAATTCGGCGTTAA  
TTCAGTACATTAAAAACGTCCGCAATGTGTTATTAAGTTGTCTAAGCGTCAATTTGTTTACACCACAATA  
TATCCTGCCACCAGCCAGCCAACAGCTCCCCGACCGGCAGCTCGGCACAAAATCACCACCTCGATACAGGC  
AGCCCATCAGTCCGGGACGGCGTCAGCGGGAGAGCCGTTGTAAGGCGGCAGACTTTGCTCATGTTACCGA  
TGCTATTCCGAAGAACGGCAACTAAGCTGCCGGGTTTGAACACGGATGATCTCGCGGAGGGTAGCATGT  
TGATTGTAACGATGACAGAGCGTTGCTGCCTGTGATCAATTGCGGCACGAACCCAGTGAGCATAAGCCTC  
GTTTCGGTTCGTAAGCTGTAATGCAAGTAGCGTAAGTCCGTCACGCAACTGGTCCAGAACCTTGACCGAA  
CGCAGCGGTGGTAACGGCGCAGTGGCGGTTTTTCATGGCTTCTTGTTATGACATGTTTTTTTTGGGGTACAG  
TCTATGCCTCGGGCATCCAAGCAGCAAGCGGTTACGCCGTGGGTCGATGTTTGATGTTATGGAGCAGCA

ACGATGTTACGCAGCAGGGCAGTCGCCCTAAAACAAAGTTAAACATCATGGGGGAAGCGGTGATCGCCGA  
AGTATCGACTCAACTATCAGAGGTAGTTGGCGTCATCGAGCGCCATCTCGAACCGACGTTGCTGGCCGTA  
CATTTGTACGGCTCCGCAGTGATGGCGGCCTGAAGCCACACAGTGATATTGATTTGCTGGTTACGGTGA  
CCGTAAGGCTTGATGAAACAACGCGGCGAGCTTTGATCAACGACCTTTTGAAACTTCGGCTTCCCCTGG  
AGAGAGCGAGATTCTCCGCGCTGTAGAAGTCACCATTGTTGTGCACGACGACATCATTCGGTGGCGTTAT  
CCAGCTAAGCGCGAACTGCAATTTGGAGAATGGCAGCGCAATGACATTCTTGACAGGTATCTTCGAGCCAG  
CCACGATCGACATTGATCTGGCTATCTTGCTGACAAAAGCAAGAGAACATAGCGTTGCCTTGGTAGGTCC  
AGCGGCGGAGGAACCTTTTGATCCGGTTCTTGAACAGGATCTATTTGAGGCGCTAAATGAAACCTTAACG  
CTATGGAACCTCGCCGCCCGACTGGGCTGGCGATGAGCGAAATGTAGTGCTTACGTTGTCCCGCATTTGGT  
ACAGCGCAGTAACCGGCAAAATCGCGCCGAAGGATGTGCTGCGCTGCCGACTGGGCAATGGAGCGCCTGCCGGC  
CCAGTATCAGCCCGTCATACTTGAAGCTAGACAGGCTTATCTTGACAGAAGAAGATCGCTTGGCCTCG  
CGCGCAGATCAGTTGGAAGAATTTGTCCACTACGTGAAAGGCGAGATCACCAAGGTAGTCGGCAAATAAT  
GTCTAGCTAGAAATTCGTTCAAGCCGACGCCGCTTCGCCGGCGTTAACTCAAGCGATTAGATGCACTAAG  
CACATAATTGCTCACAGCCAACTATCAGGTCAAGTCTGCTTTTATTATTTTAAAGCGTGCATAATAAGC  
CCTACACAAATTGGGAGATATATCATGCATGACCAAAATCCCTTAACGTGAGTTTTTCGTTCCACTGAGCG  
TCAGACCCCGTAGAAAAGATCAAAGGATCTTCTTGAGATCCTTTTTTCTGCGCGTAATCTGCTGCTTGC  
AAACAAAAAACCACCGCTACCAGCGGTGGTTTGTGTTGCCGGATCAAGAGCTACCAACTCTTTTTCCGAA  
GGTAACTGGCTTCAGCAGAGCGCAGATACCAATACTGTCTTCTAGTGTAGCCGTAGTTAGGCCACCAC  
TTCAAGAACTCTGTAGCACCGCCTACATACCTCGCTCTGCTAATCCTGTTACCAGTGGCTGCTGCCAGTG  
GCGATAAGTCGTGTCTTACCGGGTTGGACTCAAGACGATAGTTACCGGATAAGGCGCAGCGGTGCGGGCTG  
AACGGGGGGTTCTGTGCACACAGCCCAGCTTGAGCGAACGACCTACACCGAACTGAGATACCTACAGCGT  
GAGCTATGAGAAAGCGCCACGCTTCCCGAAGGGAGAAAGCGGACAGGTATCCGGTAAGCGGCAGGGTCG  
GAACAGGAGAGCGCACGAGGGAGCTTCCAGGGGAAACGCCTGGTATCTTTATAGTCCTGTGCGGGTTTCG  
CCACCTCTGACTTGAGCGTCGATTTTTGTGATGCTCGTCAGGGGGCGGAGCCTATGGAAAAACGCCAGC  
AACGCGGCCTTTTTACGGTTCTTGCCCTTTTGCTGGCCTTTTGCTCACATGTTCTTTCTGCGTTATCCC  
CTGATTCTGTGGATAACCGTATTACCGCCTTTGAGTGAGCTGATACCGCTCGCCGCAGCCGAACGACCGA  
GCGCAGCGAGTCAGTGAGCGAGGAAGCGGAAGAGCGCCTGATGCGGTATTTCTCCTTACGCATCTGTGC  
GGTATTTACACCGCATATGGTGCACTCTCAGTACAATCTGCTCTGATGCCGCATAGTTAAGCCAGTATA  
CACTCCGCTATCGCTACGTGACTGGGTCATGGCTGCGCCCCGACACCCGCCAACACCCGCTGACGCGCCC  
TGACGGGCTTGTCTGCTCCCGGCATCCGCTTACAGACAAGCTGTGACCGTCTCCGGGAGCTGCATGTGTC  
AGAGGTTTTACCGTCATACCGAAACGCGCGAGGCAGGGTGCCTTGATGTGGGCGCCGGCGGTGAGTG  
GCGACGGCGCGGCTTGTCCGCGCCCTGGTAGATTGCCTGGCCGTAGGCCAGCCATTTTTGAGCGGCCAGC  
GGCCGCGATAGGCCGACCGGAAGCGCGGGGCGTAGGGAGCGCAGCGACCGAAGGTTAGGCGCTTTTTGC  
AGCTCTTCGGCTGTGCGCTGGCCAGACAGTTATGCACAGGCCAGGCGGGTTTTAAGAGTTTTAATAAGTT  
TTAAAGAGTTTTAGGCGGAAAAATCGCCTTTTTTCTCTTTTATATCAGTCACTTACATGTGTGACCGGTT  
CCCAATGTACGGCTTTGGGTTCCCAATGTACGGGTTCGGTTCCCAATGTACGGCTTTGGGTTCCCAATG  
TACGTGCTATCCACAGGAAAGAGACCTTTTCGACCTTTTCCCCTGCTAGGGCAATTTGCCCTAGCATCT  
GCTCCGTACATTAGGAACCGGCGGATGCTTCGCCCTCGATCAGGTTGCGGTAGCGCATGACTAGGATCGG  
GCCAGCCTGCCCCGCCTCCTCCTTCAAATCGTACTCCGGCAGGTCAATTTGACCCGATCAGCTTGCGCACG  
GTGAAACAGAACTTCTTGAACCTCTCCGGCGCTGCCACTGCGTTCGTAGATCGTCTTGAACAACCATCTGG  
CTTCTGCCTTGCTGCGGCGCGGCGTGCCAGGCGGTAGAGAAAACGGCCGATGCCGGGATCGATCAAAAA  
GTAATCGGGGTGAACCGTCAGCACGTCCGGGTCTTGCCCTTCTGTGATCTCGCGGTACATCCAATCAGCT  
AGCTCGATCTCGATGTACTCCGGCCGCCGGTTTCGCTCTTTACGATCTTGTAGCGGCTAATCAAGGCTT  
CACCTCGGATACCGTCACCAGGCGGCCGTTCTTGCCCTTCTTCGTACGCTGCATGGCAACGTGCGTGGT

GTTTAACCGAATGCAGGTTTCTACCAGGTCGTCTTTCTGCTTTCCGCCATCGGCTCGCCGGCAGAACTTG  
AGTACGTCCGCAACGTGTGGACGGAACACGCGGCCGGGCTTGTCTCCCTTCCCTTCCCGGTATCGGTTCA  
TGGATTTCGGTTAGATGGGAAACCGCCATCAGTACCAGGTCGTAATCCCACACACTGGCCATGCCGGCCGG  
CCCTGCGGAAACCTCTACGTGCCCCGTCTGGAAGCTCGTAGCGGATCACCTCGCCAGCTCGTCGGTCACGC  
TTCGACAGACGGAACCGCCACGTCCATGATGCTGCGACTATCGCGGGTGCCACGTCATAGAGCATCG  
GAACGAAAAAATCTGGTTGCTCGTCGCCCTTGGGCGGCTTCCTAATCGACGGCGCACCGGCTGCCGGCGG  
TTGCCGGGATTCTTTGCGGATTTCGATCAGCGGCCGCTTGCCACGATTACCGGGGCGTGCTTCTGCCTCG  
ATGCGTTGCCGCTGGGCGGCTGCGCGGCCTTCAACTTCTCCACCAGGTCATCACCCAGCGCCGCGCCGA  
TTTGTACCGGGCCGGATGGTTTGCACCGTCACGCCGATTCTCGGGCTTGGGGGTTCCAGTGCCATTGC  
AGGGCCCGCAGACAACCCAGCCGCTTACGCTTGCCAAACCGCCGTTCTCCACACATGGGGCATTCCAC  
GGCGTCGGTGCTGGTTGTCTTGATTTTCCATGCCGCCCTCTTTAGCCGCTAAAATTCATCTACTCATT  
TATTCATTTGCTCATTTACTCTGGTAGCTGCGCGATGTATTCAGATAGCAGCTCGGTAATGGTCTTGCCCT  
TGGCGTACCGCGTACATCTTCAGCTTGGTGTGATCCTCCGCCGGCAACTGAAAGTTGACCCGCTTCATGG  
CTGGCGTGTCTGCCAGGCTGGCCAAACGTTGCAGCCTTGCTGCTGCGTGCCTCGGACGGCCGGCACTTAG  
CGTGTTTGTGCTTTTGTCTATTTTCTCTTTACCTCATTAACCTCAAATGAGTTTTGATTTAATTTACGCGG  
CCAGCGCTTGACCTCGCGGGCAGCGTCGCCCTCGGGTTCTGATTCAAGAACGGTTGTGCCGGCGGGCGG  
AGTGCTTGGGTAGCTCAGCGCTGCGTGATACGGGACTCAAGAATGGGCAGCTCGTACCCGGCCAGCGCC  
TCGGCAACCTCACCGCCGATGCGCGTGCCCTTGATCGCCCGCGACACGACAAAGCCGCTTGTAGCCTTC  
CATCCGTGACCTCAATGCGCTGCTTAACCAGCTCCACCAGGTGCGCGGTGGCCCATATGTCGTAAGGGCT  
TGGCTGCACCGGAATCAGCACGAAGTCGGCTGCCTTGATCGCGGACACAGCCAAGTCCGCCGCTGGGGC  
GCTCCGTGATCACTACGAAGTCGCGCCGGCCGATGGCCTTCAGTCGCGGTCAATCGTCGGGCGGTGCA  
TGCCGACAACGGTTAGCGGTTGATCTTCCCGCACGGCCGCCAATCGCGGGCACTGCCCTGGGGATCGGA  
ATCGACTAACAGAACATCGGCCCCGGCGAGTTGCAGGGCGCGGGCTAGATGGGTGCGATGGTTCGTCTTG  
CCTGACCCGCTTTCTGGTTAAGTACAGCGATAACCTTCATGCGTTCCCTTGCGTATTTGTTATTTAC  
TCATCGCATCATATACGACGACCGCATGACGCAAGCTGTTTTACTCAAATACACATCACCTTTTTTAGA  
CGGCGGCGCTCGGTTTCTTCAGCGGCCAAGCTGGCCGGCCAGGCCGCCAGCTTGGCATCAGACAAACCGG  
CCAGGATTTTCATGCAGCCGCACGGTTGAGACGTGCGCGGGCGGCTCGAACACGTACCCGGCCGCGATCAT  
CTCCGCTCGATCTCTTCGGTAATGAAAAACGGTTGTCCTGGCCGTCCTGGTGCGGTTTCATGCTTGTT  
CCTCTTGGCGTTTCTTCGGCGGCCGCCAGGGCGTCGGCCTCGGTCAATGCGTCCTCACGGAAGGCACC  
GCGCCGCTGGCCTCGGTGGGCGTCACTTCCTCGCTGCGCTCAAGTGCAGGTACAGGGTCGAGCGATGC  
ACGCCAAGCAGTGCAGCCGCTCTTTACGGTGCGGCCCTTCCTGGTCGATCAGCTCGCGGGCGTGCGGA  
TCTGTGCCGGGGTGAGGGTAGGGCGGGGCCAACTTCACGCCTCGGGCCTTGCGGGCTCGCGCCCGCT  
CCGGGTGCGGTGATGATTAGGGAACGCTCGAACTCGGCAATGCCGGCGAACACGGTCAACACCATGCGG  
CCGGCCGGCGTGTTGGTGTCGGCCCACGGCTCTGCCAGGCTACGCAGGCCCGCGCCGGCCTCTGGATGC  
GCTCGGCAATGTCCAGTAGGTGCGGGTGCTGCGGGCCAGGCGGTCTAGCCTGGTCACTGTCAACAACGTC  
GCCAGGGCGTAGGTGGTCAAGCATCCTGGCCAGCTCCGGGCGGTGCGGCCTGGTGCCGGTGATCTTCTCG  
GAAAACAGCTTGGTGCAGCCGGCCGCGTGCAGTTCGGCCCGTTGGTTGGTCAAGTCTGGTCGTCGGTGC  
TGACGCGGGCATAGCCAGCAGGCCAGCGCGGCGCTCTTGTTTCATGGCGTAATGTCTCCGGTTCTAGTC  
GCAAGTATTCTACTTTATGCGACTAAAACACGCGACAAGAAAACGCCAGGAAAAGGGCAGGGCGGCAGCC  
TGTCGCGTAACCTTAGGACTTGTGCGACATGTGCTTTTTCAGAACGGCTGCACTGAACGTCAGAAGCCGA  
CTGCACTATAGCAGCGAGGGGTTGGATCAAAGTACTTTGATCCCAGGGGAACCCTGTGGTTGGCATGC  
ACATACAAATGGACGAACGGATAAACCTTTTCACGCCCTTTTAAATATCCGTTATTCTAATAAACGCTCT  
TTTCTCTTAGGTTTACCCGCCAATATATCCTGTCAAACACTGATAGTTTAAACTGAAGGCGGGAAACGAC  
AATCTGATCCAAGCTCAAGCTAAGCTTGAGCTCTGCATGCCTGCAGGTCCCAGATTAGCCTTTTCAATT



TCAGAAAGAATGCTAACCACAGATGGTTAGAGAGGCTTACGCAGCAGGTCTCATCAAGACGATCTACCC  
GAGCAATAATCTCCAGGAAATCAAATACCTTCCCAAGAAGGTTAAAGATGCAGTCAAAAGATTCAGGACT  
AACTGCATCAAGAACACAGAGAAAGATATATTTCTCAAGATCAGAAGTACTATTCCAGTATGGACGATTC  
AAGGCTTGCTTCACAAACCAAGGCAAGTAATAGAGATTGGAGTCTCTAAAAAGGTAGTTCCCACTGAATC  
AAAGGCCATGGAGTCAAAGATTCAAATAGAGGACCTAACAGAACTCGCCGTAAAGACTGGCGAACAGTTC  
ATACAGAGTCTCTTACGACTCAATGACAAGAAGAAAATCTTCGTCAACATGGTGGAGCACGACACACTTG  
TCTACTCCAAAAATATCAAAGATACAGTCTCAGAAGACCAAAGGGCAATTGAGACTTTTCAACAAAGGT  
AATATCCGGAACCTCTCGGATTCCATTGCCCAGCTATCTGTCACTTTATTGTGAAGATAGTGGAAAAG  
GAAGGTGGCTCCTACAAATGCCATCATTGCGATAAAGGAAAGGCCATCGTTGAAGATGCCTCTGCCGACA  
GTGGTCCCAAGATGGACCCCCACCCACGAGGAGCATCGTGGAAGAAAGACGTTCCAACCACGTCTTC  
AAAGCAAGTGGATTGATGTGATATCTCCACTGACGTAAGGGATGACGCACAATCCCACTATCCTTCGCAA  
GACCCTTCTCTATATAAGGAAGTTCATTTTCAATTTGGAGAGAACACGGGGGACTCTAGAGGATCCAAGGA  
GATATAAGCCGCCACCATGGATTACAAGGACGATGATGACAAGGACTACAAGGACGATGACGATAAGGAC  
TATAAGGATGACGATGACAAGGATTACGCCGAGGATGGATGATACTAGCGGACAAACTTTCGTTTCTGTG  
AACCTTTCTGACGAAAGCAACACGGCAAGCACTAAAGTTGAAAACGTAAAATCGGAAGCGGATCGCTTGG  
AGTTTTTACGTAAAATGAATCCCTTTATTGTTGACGCTCTGGTGCGGAAAACCAATTATCAGGGTGCTCG  
CTTTCGCGCAAGAATAATAGGAGTGTGCGTGGATTGTGGTAGAAAACACGACAAGGCGCTCAAGACTGCG  
CGTAAGTGTAAGGTCAACAACACGCAATCTCAGAACGAGGTGGCGCATATGTTGATGCACGATCCCGTTA  
AGTATTTGAACAAAAGAAAGGCTAGAGCCTTTTCTAACGCAGAGATGTTTGCGATTGAACTGGTTTCGTA  
CACCAAGGAAAGGCAATTGGCGGTGCGATTTAGCCGCTGAAAGGGAGAAGACGAGACTGGCTCGTAGACAC  
CCAATACGTTCTCCGGAAGAACTCCGGAACATTATAAATTCGGTATGACTGCTAAGGCAATGTTACCGG  
ACATCAACGCCGTAGACGTTGGTGATAACGAGGAACTTCGTGCGAGTACCCAGTGAGTCTGAGTGTTTC  
TGGCGGAGTTCTCCGTGAACACCACTTCATCTGACCTCTCCCTAATGATATCCCGCGGCCATGCTAGAG  
TCCGCAAAAATCACCAGTCTCTCTCTACAAATCTATCTCTCTATTTTTCTCCAGAATAATGTGTGAGT  
AGTTCCAGATAAGGGAATTAGGGTTCTTATAGGGTTTCGCTCATGTGTTGAGCATATAAGAAACCTTA  
GTATGTATTTGTATTTGTAAAATACTTCTATCAATAAAATTTCTAATTCCTAAAACCAAAATCCAGTGAC  
CTGCAGGCATGCGACGTCG

### Sequence of pH7LIC3.1.1-p23M3 (35S- p23M3)

GGGTACCCTCGAATTATCATACATGAGAATTAAGGGAGTCACGTTATGACCCCGCCGATGACGCGGGACA  
AGCCGTTTTACGTTTGGAACTGACAGAACCGAACGTTGAAGGAGCCACTGAGCCGCGGGTTTCTGGAGT  
TTAATGAGCTAAGCACATACGTCAGAAACCATTATTGCGCGTTCAAAAGTCGCCTAAGGTCACTATCAGC  
TAGCAATATTTCTTGTCAAAAATGCTCCACTGACGTTCCATAAATTCCCCTCGGTATCCAATTAGAGTC  
TCATATTAAGTCTCAACTCGAATCCCCCTATGAAAAAGCCTGAACTACCGCGACGCTGTGCGAGAAGT  
TTCTGATCGAAAAGTTGACAGCGTCTCCGACCTGATGCAGCTCTCGGAGGGCGAAGAATCTCGTGCTTT  
CAGCTTCGATGTAGGAGGGCGTGGATATGTCTGCGGGTAAATAGCTGCGCCGATGGTTTCTACAAAGAT  
CGTTATGTTTATCGGCACCTTTCATCGGCCGCGCTCCCGATTCCGGAAGTGCTTGACATTGGGGAGTTCA  
GCGAGAGCCTGACCTATTGCATCTCCCGCCGTGCACAGGGTGTACGTTGCAAGACCTGCCTGAAACCGA  
ACTGCCCCTGTTCTTCAGCCGGTTCGCGGAGGCTATGGATGCTATCGCTGCGGCCGATCTTAGCCAGACG  
AGCGGGTTCGGGCCATTCGGACCGCAAGGAATCGGTCAATACACTACATGGCGTGATTTTCATATGCGCGA  
TTGCTGATCCCATGTGTATCACTGGCAAACTGTGATGGACGACACCGTCAGTGCGTCCGTCGCGCAGGC  
TCTCGATGAGCTGATGCTTTGGGCGAGGACTGCCCCGAAGTCCGGCACTCGTGACGCGGATTTCGGCTCC  
AACAAATGTCCTGACGGACAATGGCCGCATAACAGCGGTCAATTGACTGGAGCGAGGCGATGTTTCGGGGATT  
CCCAATACGAGGTGCCAACATCTTCTCTGGAGGCCGTGGTTGGCTTGATGGAGCAGCAGACGCGCTA

CTTCGAGCGGAGGCATCCGGAGCTTGCAGGATCGCCAAGGCTCCGGGCGTATATGCTCCGCATTGGTCTT  
GACCAACTCTATCAGAGCTTGGTTGACGGCAATTTTCGATGATGCAGCTTGGGCGCAGGGTCGATGCGACG  
CAATCGTCCGATCCGGAGCCGGGACTGTCCGGGCGTACACAAATCGCCCGCAGAAGCGCGGCCGTCTGGAC  
CGATGGCTGTGTAGAAGTACTCGCCGATAGTGGAACCGACGCCCCAGCACTCGTCCGAGGGCAAAGGAA  
TAGAGTAGATGCCGACCGAACAAGAGCTGATTTTCGAGAACGCCTCAGCCAGCAACTCGCGCGAGCCTAGC  
AAGGCAAATGCGAGAGAACGGCCTTACGCTTGGTGGCACAGTTCTCGTCCACAGTTCGCTAAGCTCGCTC  
GGCTGGGTCGCGGGAGGGCCGGTCGCAGTGATTTCAGGAATTAATTCCCTAGAGTCAAGCAGATCGTTCAA  
ACATTTGGCAATAAAGTTTCTTAAGATTGAATCCTGTTGCCGGTCTTGCGATGATTATCATATAATTTCT  
GTTGAATTACGTTAAGCATGTAATAATTAACATGTAATGCATGACGTTATTTATGAGATGGGTTTTTATG  
ATTAGAGTCCCGCAATTATACATTTAATACGCGATAGAAAACAAAATATAGCGCGCAAACCTAGGATAAAT  
TATCGCGCGGGTGTCTATGTTACTAGATCGACCGCATGCAAGCTGATAATTCAATTCGGCGTTAA  
TTCAGTACATTAAAAACGTCCGCAATGTGTTATTAAGTTGTCTAAGCGTCAATTTGTTTACACCACAATA  
TATCCTGCCACCAGCCAGCCAACAGCTCCCCGACCGGCAGCTCGGCACAAAATCACCCTCGATACAGGC  
AGCCCATCAGTCCGGGACGGCGTCAGCGGGAGAGCCGTTGTAAGGCGGCAGACTTTGCTCATGTTACCGA  
TGCTATTTCGAAGAACGGCAACTAAGCTGCCGGGTTTGAACACGGATGATCTCGCGGAGGGTAGCATGT  
TGATTGTAACGATGACAGAGCGTTGCTGCCTGTGATCAATTCGGGCACGAACCCAGTGGACATAAGCCTC  
GTTTCGGTTCGTAAGCTGTAATGCAAGTAGCGTAAGTCCGTCACGCAACTGGTCCAGAACCTTGACCGAA  
CGCAGCGGTGGTAACGGCGCAGTGGCGGTTTTTCATGGCTTCTTGTTATGACATGTTTTTTTTGGGGTACAG  
TCTATGCCTCGGGCATCCAAGCAGCAAGCGCGTTACGCCGTGGGTCGATGTTTGATGTTATGGAGCAGCA  
ACGATGTTACGCAGCAGGGCAGTCGCCCTAAAACAAAGTTAAACATCATGGGGGAAGCGGTGATCGCCGA  
AGTATCGACTCAACTATCAGAGGTAGTTGGCGTCATCGAGCGCCATCTCGAACCGACGTTGCTGGCCGTA  
CATTTGTACGGCTCCGCAGTGGATGGCGGCCTGAAGCCACACAGTGATATTGATTTGCTGGTTACGGTGA  
CCGTAAGGCTTGATGAAAACACGCGGCAGCTTTGATCAACGACCTTTTGGAAACTTCGGCTTCCCCTGG  
AGAGAGCGAGATTCTCCGCGCTGTAGAAGTCACCATTGTTGTGCACGACGACATCATTCCTGGCGTTAT  
CCAGCTAAGCGCGAACTGCAATTTGGAGAATGGCAGCGCAATGACATTCTTGCAAGTATCTTCGAGCCAG  
CCACGATCGACATTGATCTGGCTATCTTGCTGACAAAAGCAAGAGAACATAGCGTTGCCTTGGTAGGTCC  
AGCGGCGGAGGAACCTTTTGATCCGTTTCTGAACAGGATCTATTTGAGGCGCTAAATGAAACCTTAACG  
CTATGGAACTCGCCGCCGACTGGGCTGGCGATGAGCGAAATGTAGTGCTTACGTTGTCCCGCATTTGGT  
ACAGCGCAGTAACCGGCAAAATCGCGCCGAAGGATGTCGCTGCCGACTGGGCAATGGAGCGCCTGCCGGC  
CCAGTATCAGCCCGTCATACTTGAAGCTAGACAGGCTTATCTTGACAAAGAAGAAGATCGCTTGGCCTCG  
CGCGCAGATCAGTTGGAAGAATTTGTCCACTACGTGAAAGGCGAGATCACCAAGGTAGTCGGCAAATAAT  
GTCTAGCTAGAAATTCGTTCAAGCCGACGCCGCTTCGCCGGCGTTAACTCAAGCGATTAGATGCACTAAG  
CACATAATTGCTCACAGCCAACTATCAGGTCAAGTCTGCTTTTATTATTTTAAAGCGTGATAATAAGC  
CCTACACAAATTGGGAGATATATCATGCATGACCAAAATCCCTTAACGTGAGTTTTTCGTTCCACTGAGCG  
TCAGACCCCGTAGAAAAGATCAAAGGATCTTCTTGAGATCCTTTTTTTCTGCGCGTAATCTGCTGCTTGC  
AAACAAAAAAACCACCGCTACCAGCGGTGGTTTTGTTTGGCGGATCAAGAGCTACCAACTCTTTTTCCGAA  
GGTAACTGGCTTCAGCAGAGCGCAGATACCAAATACTGTCTTCTAGTGTAGCCGTAGTTAGGCCACCAC  
TTCAAGAACTCTGTAGCACCGCTACATACCTCGCTCTGCTAATCCTGTTACCAGTGGCTGCTGCCAGTG  
GCGATAAGTCGTGTCTTACCGGGTTGGACTCAAGACGATAGTTACCGGATAAGGCGCAGCGGTGCGGCTG  
AACGGGGGGTTTCGTGCACACAGCCAGCTTGGAGCGAACGACCTACACCGAACTGAGATACCTACAGCGT  
GAGCTATGAGAAAGCGCCACGCTTCCCGAAGGGAGAAAGGCGGACAGGTATCCGGTAAGCGGCAGGGTCG  
GAACAGGAGAGCGCACGAGGGAGCTTCCAGGGGAAACGCCTGGTATCTTTATAGTCCGTGTCGGGTTTTCG  
CCACCTCTGACTTGAGCGTCGATTTTTGTGATGCTCGTCAGGGGGCGGAGCCTATGAAAAACGCCAGC  
AACGCGGCCTTTTTACGGTTTCTGGCCTTTTGCTGGCCTTTTGCTCACATGTTCTTTCTGCGTTATCCC

CTGATTCTGTGGATAACCGTATTACCGCCTTTGAGTGAGCTGATACCGCTCGCCGCAGCCGAACGACCGA  
GCGCAGCGAGTCAGTGAGCGAGGAAGCGGAAGAGCGCCTGATGCGGTATTTTCTCCTTACGCATCTGTGC  
GGTATTTACACCGCATATGGTGCACCTCTCAGTACAATCTGCTCTGATGCCGCATAGTTAAGCCAGTATA  
CACTCCGCTATCGCTACGTGACTGGGTCTGGCTGCGCCCCGACACCCGCCAACACCCGCTGACGCGCCC  
TGACGGGCTTGTCTGCTCCCGGCATCCGCTTACAGACAAGCTGTGACCGTCTCCGGGAGCTGCATGTGTCT  
AGAGGTTTTACCGTCATCACCGAAACGCGCGAGGCAGGGTGCCTTGATGTGGGCGCCGGCGGTTCGAGTG  
GCGACGGCGCGGCTTGTCCGCGCCCTGGTAGATTGCCTGGCCGTAGGCCAGCCATTTTTGAGCGGCCAGC  
GGCCGCGATAGGCCGACGCGAAGCGGCGGGCGTAGGGAGCGCAGCGACCGAAGGGTAGGCGCTTTTTTGC  
AGCTCTTCGGCTGTGCGCTGGCCAGACAGTTATGCACAGGCCAGGCGGGTTTTAAGAGTTTTAATAAGTT  
TTAAAGAGTTTTTAGGCGGAAAAATCGCCTTTTTTCTCTTTTATATCAGTCACTTACATGTGTGACCGGTT  
CCCAATGTACGGCTTTGGGTTCCCAATGTACGGGTTCCGGTTCCCAATGTACGGCTTTGGGTTCCCAATG  
TACGTGCTATCCACAGGAAAGAGACCTTTTCGACCTTTTTCCCCTGCTAGGGCAATTTGCCCTAGCATCT  
GCTCCGTACATTAGGAACCGGCGGATGCTTCGCCCTCGATCAGGTTGCGGTAGCGCATGACTAGGATCGG  
GCCAGCCTGCCCCGCTCTCCTTCAAATCGTACTCCGGCAGGTCATTTGACCCGATCAGCTTGCGCACG  
GTGAAACAGAACCTTCTTGAACCTCTCCGGCGCTGCCACTGCGTTCGTAGATCGTCTTGAACAACCATCTGG  
CTTCTGCCTTGCTGCGGCGCGGCGTGCCAGGCGGTAGAGAAAACGGCCGATGCCGGGATCGATCAAAAA  
GTAATCGGGGTGAACCGTCAGCACGTCCGGGTTCTTGCCTTCTGTGATCTCGCGGTACATCCAATCAGCT  
AGCTCGATCTCGATGTACTCCGGCCGCCGGTTTTCGCTCTTTACGATCTTGTAGCGGCTAATCAAGGCTT  
CACCTCGGATACCGTCACCAGGCGGCCGTTCTTGGCCTTCTTCGTACGCTGCATGGCAACGTGCGTGGT  
GTTTAACCGAATGCAGGTTTTCTACCAGGTGCTCTTTCTGCTTTCCGCCATCGGCTCGCCGGCAGAACTTG  
AGTACGTCCGCAACGTGTGGACGGAACACGCGGCCGGGCTTGTCTCCCTTCCCTTCCCGGTATCGGTTCA  
TGGATTTCGGTTAGATGGGAAACCGCCATCAGTACCAGGTCGTAATCCACACACTGGCCATGCCGGCCGG  
CCCTGCGGAAACCTCTACGTGCCCCGTCTGGAAGCTCGTAGCGGATCACCTCGCCAGCTCGTCGGTCACGC  
TTCGACAGACGGAACCGCCACGTCCATGATGCTGCGACTATCGCGGGTGCCACGTCATAGAGCATCG  
GAACGAAAAAATCTGGTTGCTCGTCGCCCTTGGGCGGCTTCCTAATCGACGGCGCACCGGCTGCCGGCGG  
TTGCCGGGATTCTTTGCGGATTTCGATCAGCGGCCGCTTGCCACGATTACCGGGGCGTGCTTCTGCCTCG  
ATGCGTTGCCGCTGGGCGGCCGTGCGCGGCTTCAACTTCTCCACCAGGTCATCACCCAGCGCCGCGCCGA  
TTTGTACCGGGCCGGATGGTTTTCGACCGTCACGCCGATTCTCGGGCTTGGGGGTTCCAGTGCCATTGC  
AGGGCCGGCAGACAACCCAGCCGCTTACGCCTGGCCAACCGCCGTTCTCCACACATGGGGCATTCCAC  
GGCGTCGGTGCTGCTTGTCTTTCATTTCCATGCCGCTCCTTTAGCCGCTAAAATTCATCTACTCATT  
TATTCAATTGCTCATTTACTCTGGTAGCTGCGCGATGTATTAGATAGCAGCTCGGTAATGGTCTTGCCT  
TGGCGTACCGCGTACATCTTACGCTTGGTGTGATCTCCGCCGGCAACTGAAAGTTGACCCGCTTCATGG  
CTGGCGTGTCTGCCAGGCTGGCCAACGTTGCAGCCTTGCTGCTGCGTGCCTCGGACGGCCGGCACTTAG  
CGTGTTTGTGCTTTTGTCTATTTTCTCTTTACCTCATTAACCTCAAATGAGTTTTGATTTAATTTACGCG  
CCAGCGCCTGGACCTCGCGGGCAGCGTCGCCCTCGGGTTCTGATTCAAGAACGGTTGTGCCGGCGGCGGC  
AGTGCCTGGGTAGCTCACGCGCTGCGTGATACGGGACTCAAGAATGGGCAGCTCGTACCCGGCCAGCGCC  
TCGGCAACCTCACCGCCGATGCGCGTGCCCTTTGATCGCCCGGACACGACAAAGGCCGCTTGATAGCCTTC  
CATCCGTGACCTCAATGCGCTGCTTAACCAGCTCCACCAGGTGCGCGGTGGCCCATATGTCGTAAGGGCT  
TGGCTGCACCGGAATCAGCACGAAGTCGGCTGCCTTGATCGCGGACACAGCCAAGTCCGCCGCTTGGGGC  
GCTCCGTGATCACTACGAAGTCGCGCCGGCCGATGGCCTTCACGTGCGGGTCAATCGTCGGGCGGTTCGA  
TGCCGACAACGGTTAGCGGTTGATCTTCCCGCACGGCCGCCAATCGCGGGCACTGCCCTGGGGATCGGA  
ATCGACTAACAGAACATCGGCCCCGGCGAGTTGCAGGGCGCGGGCTAGATGGGTTGCGATGGTCTGCTTG  
CCTGACCCGCTTTCTGGTTAAGTACAGCGATAACCTTCATGCGTTCCCTTGCGTATTTGTTTATTAC  
TCATCGCATCATATACGCAGCGACCGCATGACGCAAGCTGTTTTACTCAAATACACATCACCTTTTTAGA

CGGCGGCGCTCGGTTTCTTCAGCGGCCAAGCTGGCCGGCCAGGCCGCCAGCTTGGCATCAGACAAACCGG  
CCAGGATTTTCATGCAGCCGCACGGTTGAGACGTGCGCGGGCGGCTCGAACACGTACCCGGCCGCGATCAT  
CTCCGCCTCGATCTCTTCGGTAATGAAAAACGGTTTCGTCTGGCCGTCTTGGTGCGGTTTCATGCTTGTT  
CCTCTTGGCGTTTATTCTCGGCGGCCGCCAGGGCGTCGGCTCGGTCAATGCGTCTCACGGAAGGCACC  
GCGCCGCTGGCCTCGGTGGGCGTCACTTCCTCGCTGCGCTCAAGTGCGCGGTACAGGGTCGAGCGATGC  
ACGCCAAGCAGTGCAGCCGCTCTTTCACGGTGCGGCCCTTCCTGGTCGATCAGCTCGCGGGCGTGCGGA  
TCTGTGCCGGGTGAGGGTAGGGCGGGGCCAAACTTCACGCCTCGGGCCTTGGCGGCCTCGCGCCCGCT  
CCGGGTGCGGTGATGATTAGGGAACGCTCGAACTCGGCAATGCCGGCGAACACGGTCAACACCATGCGG  
CCGGCCGGCGTGGTGGTGTGCGGCCACGGCTCTGCCAGGCTACGCAGGCCCCGCGCGGCCTCTGGATGC  
GCTCGGCAATGTCCAGTAGGTGCGGGTCTGCGGGCCAGGCGGTCTAGCCTGGTCACTGTCAACACGTC  
GCCAGGGCGTAGGTGGTCAAGCATCCTGGCCAGCTCCGGGCGGTGCGCCTGGTGCCGGTGATCTTCTCG  
GAAAACAGCTTGGTGCAGCCGGCCGCGTGCAGTTCGGCCCGTTGGTTGGTCAAGTCTGGTCGTCGGTGC  
TGACGCGGGCATAGCCAGCAGGCCAGCGGCGGCGCTCTGTTCATGGCGTAATGTCTCCGGTTCTAGTC  
GCAAGTATTCTACTTTATGCGACTAAAACACGCGACAAGAAAACGCCAGGAAAAGGGCAGGGCGGCAGCC  
TGTCGCGTAACCTTAGGACTTGTGCGACATGTGTTTTTCAAGAAGACGGCTGCACTGAACGTGAGAAGCCGA  
CTGCACTATAGCAGCGGAGGGGTGGATCAAAGTACTTTGATCCCGAGGGGAACCTGTGGTTGGCATGC  
ACATACAAATGGACGAACGGATAAACCTTTTCAGCCCTTTTAAATATCCGTTATTCTAATAAACGCTCT  
TTTCTCTTAGGTTTACCCGCCAATATATCCTGTCAAACACTGATAGTTTAAACTGAAGGCGGGAAACGAC  
AATCTGATCCAAGCTCAAGCTAAGCTTGAGCTCTGCATGCCTGCAGGTCCCAGATTAGCCTTTTCAATT  
TCAGAAAGAATGCTAACCCACAGATGGTTAGAGAGGCTTACGCAGCAGGTCTCATCAAGACGATCTACCC  
GAGCAATAATCTCCAGGAAATCAAATACCTTCCCAAGAAGGTTAAAGATGCAGTCAAAAGATTAGGACT  
AACTGCATCAAGAACACAGAGAAAGATATATTTCTCAAGATCAGAAGTACTATTCCAGTATGGACGATTC  
AAGGCTTGCTTCACAAACCAAGGCAAGTAATAGAGATTGGAGTCTCTAAAAAGGTAGTTCCTACTGAATC  
AAAGGCCATTGGAGTCAAAGATTCAAATAGAGGACCTAACAGAACTCGCCGTAAAGACTGGCGAACAGTTC  
ATACAGAGTCTCTTACGACTCAATGACAAGAAGAAAATCTTCGTCAACATGGTGAGCACGACACACTTG  
TCTACTCCAAAAATATCAAAGATACAGTCTCAGAAGACCAAAGGGCAATTGAGACTTTTCAACAAAGGGT  
AATATCCGGAAACCTCCTCGGATTCCATTGCCAGCTATCTGTCACTTTATTGTGAAGATAGTGGAAGG  
GAAGGTGGCTCCTACAAATGCCATCATTGCGATAAAGGAAAGGCCATCGTTGAAGATGCCTCTGCCGACA  
GTGGTCCCAAAGATGGACCCCCACCCACGAGGAGCATCGTGGAAGAAAGACGTTCCAACCACGTCTTC  
AAAGCAAGTGGATTGATGTGATATCTCCACTGACGTAAGGGATGACGCACAATCCCACTATCCTTCGCAA  
GACCCTTCTCTATATAAGGAAGTTCATTTCAATTGGAGAGAACACGGGGGACTCTAGAGGATCCAAGGA  
GATATAAGCCGCCACCATGGATTACAAGGACGATGATGACAAGGACTACAAGGACGATGACGATAAGGAC  
TATAAGGATGACGATGACAAGGATTACGCCGAGGATGGATGATACTAGCGGACAACTTTCGTTTCTGTG  
AACCTTTCTGACGAAAGCAACACGGCAAGCACTAAAGTTGAAAACGTAAAATCGGAAGCGGATCGCTTGG  
AGTTTTTTACGTAAAATGAATCCCTTTATTGTTGACGCTCTGGTGCGGAAAACCAATTATCAGGGTGCTCG  
CTTTCGCGCAAGAATAATAGGAGTGTGCGTGGATTGTGGTAGAAAACACGACAAGGCGCTCAAGACTGAA  
CGTAAGTGTAAGGTCAACGCGGCGCAATCTCAGAACGAGGTGGCGCATATGTTGATGCACGATCCCGTTA  
AGTATTTGAACAAAAGAAAGGCTAGAGCCTTTTCTAACGCAGAGATGTTTGCGATTGAACTGGTTTCGTA  
CACCAAGGAAAGGCAATTGGCGGTGATTTAGCCGCTGAAAGGGAGAAGACGAGACTGGCTCGTAGACAC  
CCAATACGTTCTCCGGAAGAACTCCGGAACATTATAAATTCGGTATGACTGCTAAGGCAATGTTACCGG  
ACATCAACGCCGTAGACGTTGGTGATAACGAGGAACTTCGTGCGAGTACCCAGTGAGTCTGAGTGTTC  
TGGCGGAGTTCTCCGTGAACACCACTTCATCTGACCTCTCCCTAATGATATCCCGCGCCATGCTAGAG  
TCCGCAAAAATCACCAGTCTCTCTCTACAAATCTATCTCTCTATTTTTCTCCAGAATAATGTGTGAGT  
AGTTCCAGATAAGGGAATTAGGGTTCTTATAGGGTTTCGCTCATGTGTTGAGCATATAAGAAACCTTA

GTATGTATTTGTATTTGTAAAATACTTCTATCAATAAAATTTCTAATTCCTAAAACCAAATCCAGTGAC  
CTGCAGGCATGCGACGTCG

### Sequence of pH7LIC3.1.1-p23M4 (35S- p23M4)

GGGTACCCTCGAATTATCATACATGAGAATTAAGGGAGTCACGTTATGACCCCGCCGATGACGCGGGACA  
AGCCGTTTTACGTTTGGAACTGACAGAACCGCAACGTTGAAGGAGCCACTGAGCCGCGGGTTTCTGGAGT  
TTAATGAGCTAAGCACATACGTCAGAAACCATTATTGCGCGTTCAAAGTCGCCTAAGGTCACTATCAGC  
TAGCAAATATTTCTTGTCAAAAATGCTCCACTGACGTTCCATAAATTC CCTCGGTATCCAATTAGAGTC  
TCATATTCACCTCTCAACTCGAATCCCCCTATGAAAAAGCCTGAACTCACCGCGACGTCTGTGAGAAGT  
TTCTGATCGAAAAGTTCGACAGCGTCTCCGACCTGATGCAGCTCTCGGAGGGCGAAGAATCTCGTGCTTT  
CAGCTTCGATGTAGGAGGGCGTGATATGTCTGCGGGTAAATAGCTGCGCCGATGGTTTCTACAAAGAT  
CGTTATGTTTATCGGCACCTTTCATCGGCCGCGCTCCCGATTCCGGAAGTGCTTGACATTGGGGAGTTCA  
GCGAGAGCCTGACCTATTGCATCTCCCGCCGTGCACAGGGTGTCACGTTGCAAGACCTGCCTGAAACCGA  
ACTGCCCGCTGTTCTTCAGCCGGTCGCGGAGGCTATGGATGCTATCGCTGCGGCCGATCTTAGCCAGACG  
AGCGGGTTCGGCCCATTCGGACCGCAAGGAATCGGTCAATACACTACATGGCGTGATTTTCATATGCGCGA  
TTGCTGATCCCCATGTGTATCACTGGCAAACGTGTGATGGACGACACCGTCAGTGCGTCCGTCGCGCAGGC  
TCTCGATGAGCTGATGCTTTGGGCGAGGACTGCCCCGAAGTCCGGCACTCGTGACGCGGATTCGGCTCC  
AACAATGTCTGACGGACAATGGCCGCATAACAGCGGTCAATTGACTGGAGCGAGGCGATGTTGGGGATT  
CCCAATACGAGGTCGCCAACATCTTCTTCTGGAGGCCGTGGTTGGCTTGATGGAGCAGCAGACGCGCTA  
CTTCGAGCGGAGGCATCCGGAGCTTGCAAGGATCGCCAAGGCTCCGGGCGTATATGCTCCGCATTGGTCTT  
GACCAACTCTATCAGAGCTTGGTTGACGGCAATTTTCATGATGCAGCTTGGGCGAGGGTCGATGCGACG  
CAATCGTCCGATCCGGAGCCGGGACTGTGCGGGCTACACAAATCGCCCGCAGAAGCGCGGCCGTCTGGAC  
CGATGGCTGTGTAGAAGTACTCGCCGATAGTGGAACCGACGCCCCAGCACTCGTCCGAGGGCAAAGGAA  
TAGAGTAGATGCCGACCGAACAAGAGCTGATTTGAGAACGCCTCAGCCAGCAACTCGCGCGAGCCTAGC  
AAGGCAAATGCGAGAGAACGGCCTTACGCTTGGTGACAGTTCTCGTCCACAGTTCGCTAAGCTCGCTC  
GGCTGGGTGCGGGAGGGCCGGTCGAGTGATTTCAGGAATTAATTCCTAGAGTCAAGCAGATCGTTCAA  
ACATTTGGCAATAAAGTTTCTTAAGATTGAATCCTGTTGCCGGTCTTGCGATGATTATCATATAATTTCT  
GTTGAATTACGTTAAGCATGTAATAATTAACATGTAATGCATGACGTTATTTATGAGATGGGTTTTTATG  
ATTAGAGTCCCGCAATTATACATTTAATACGCGATAGAAAACAAAATATAGCGCGCAAACTAGGATAAAT  
TATCGCGCGCGGTGTCTATGTTACTAGATCGACCGCATGCAAGCTGATAATTC AATTCGGCGTTAA  
TTCAGTACATTAAAAACGTCCGCAATGTGTTATTAAGTTGTCTAAGCGTCAATTTGTTTACACCACAATA  
TATCCTGCCACCAGCCAGCCAACAGCTCCCCGACCGGCAGCTCGGCACAAAATCACCCTCGATACAGGC  
AGCCCATCAGTCCGGGACGGCGTCAGCGGGAGAGCCGTTGTAAGGCGGCAGACTTTGCTCATGTTACCGA  
TGCTATTCCGAAGAACGGCAACTAAGCTGCCGGGTTTGAAACACGGATGATCTCGCGGAGGGTAGCATGT  
TGATTGTAACGATGACAGAGCGTTGCTGCCTGTGATCAATTCGGGCACGAACCCAGTGGACATAAGCCTC  
GTTCCGGTTCGTAAGCTGTAATGCAAGTAGCGTAACTGCCGTACGCAACTGGTCCAGAACCTTGACCGAA  
CGCAGCGGTGGTAACGGCGCAGTGGCGGTTTTTCATGGCTTCTTGTTATGACATGTTTTTTTTGGGGTACAG  
TCTATGCCTCGGGCATCCAAGCAGCAAGCGGTTACGCCGTGGGTGATGTTTGATGTTATGGAGCAGCA  
ACGATGTTACGCAGCAGGGCAGTCGCCCTAAAACAAAGTTAAACATCATGGGGGAAGCGGTGATCGCCGA  
AGTATCGACTCAACTATCAGAGGTAGTTGGCGTCATCGAGCGCCATCTCGAACCGACGTTGCTGGCCGTA  
CATTTGTACGGCTCCGCAGTGATGGCGGCCTGAAGCCACACAGTGATATTGATTTGCTGGTTACGGTGA  
CCGTAAGGCTTGATGAAACAACGCGCGAGCTTTGATCAACGACCTTTTGAAAACCTTCGGCTTCCCTTG  
AGAGAGCGAGATTCTCCGCGCTGTAGAAGTCAACATTGTTGTGCACGACGACATCATTCCTGGCGTTAT  
CCAGCTAAGCGCGAACTGCAATTTGGAGAATGGCAGCGCAATGACATTCTTGAGGTATCTTCGAGCCAG

CCACGATCGACATTGATCTGGCTATCTTGCTGACAAAAGCAAGAGAACATAGCGTTGCCTTGGTAGGTCC  
AGCGGCGGAGGAACCTCTTTGATCCGGTTCTCTGAACAGGATCTATTTGAGGCGCTAAATGAAACCTTAACG  
CTATGGAACTCGCCGCCGACTGGGCTGGCGATGAGCGAAATGTAGTGCTTACGTTGTCCCGCATTTGGT  
ACAGCGCAGTAACCGGCAAAATCGCGCCGAAGGATGTCGCTGCCGACTGGGCAATGGAGCGCTGCCGGC  
CCAGTATCAGCCCGTCATACTTGAAGCTAGACAGGCTTATCTTGGACAAGAAGAAGATCGCTTGGCCTCG  
CGCGCAGATCAGTTGGAAGAATTTGTCCACTACGTGAAAGGCGAGATCACCAAGGTAGTCGGCAAATAAT  
GTCTAGCTAGAAATTCGTTCAAGCCGACGCCGCTTCGCCGGCGTTAACTCAAGCGATTAGATGCACTAAG  
CACATAATTGCTCACAGCCAACTATCAGGTCAAGTCTGCTTTTATTATTTTAAAGCGTCATAATAAGC  
CCTACACAAATTGGGAGATATATCATGCATGACCAAAATCCCTTAACGTGAGTTTTCTGTTCCACTGAGCG  
TCAGACCCCGTAGAAAAGATCAAAGGATCTTCTTGAGATCCTTTTTTTCTGCGCGTAATCTGCTGCTTGC  
AAACAAAAAAACCACCGCTACCAGCGGTGGTTTGTGTTGCCGGATCAAGAGCTACCAACTCTTTTTCCGAA  
GGTAACTGGCTTCAGCAGAGCGCAGATACCAAATACTGTCTTCTAGTGTAGCCGTAGTTAGGCCACCAC  
TTCAAGAACTCTGTAGCACCAGCTACATACCTCGCTCTGCTAATCCTGTTACCAGTGGCTGCTGCCAGTG  
GCGATAAGTCGTGTCTTACCGGGTTGGACTCAAGACGATAGTTACCGGATAAGGCGCAGCGGTGCGGCTG  
AACGGGGGGTTTCGTGCACACAGCCCAGCTTGGAGCGAACGACCTACACCGAACTGAGATACCTACAGCGT  
GAGCTATGAGAAAGCGCCACGCTTCCCGAAGGGAGAAAGGCGGACAGGTATCCGGTAAGCGGCAGGGTCG  
GAACAGGAGAGCGCAGAGGGAGCTTCCAGGGGAAACGCTGGTATCTTTATAGTCCTGTGCGGTTTTCG  
CCACCTCTGACTTGAGCGTCGATTTTTGTGATGCTCGTCAGGGGGCGGAGCCTATGAAAAACGCCAGC  
AACGCGGCCTTTTTACGGTTCTTGGCCTTTTGCTGGCCTTTTGCTCACATGTTCTTTCTGCGTTATCCC  
CTGATTCTGTGGATAACCGTATTACCGCCTTTGAGTGAGCTGATACCGCTCGCCGCAGCCGAACGACCGA  
GCGCAGCGAGTCAGTGAGCGAGGAAGCGGAAGAGCGCCTGATGCGGTATTTTCTCCTTACGCATCTGTGC  
GGTATTTACACCGCATATGGTGCACTCTCAGTACAATCTGCTCTGATGCCGCATAGTTAAGCCAGTATA  
CACTCCGCTATCGCTACGTGACTGGGTTCATGGCTGCGCCCCGACACCCGCCAACACCCGCTGACGCGCCC  
TGACGGGCTTGTCTGCTCCCGCATCCGCTTACAGACAAGCTGTGACCGTCTCCGGGAGCTGCATGTGTC  
AGAGGTTTTACCGTCATCACCGAAACGCGCAGGCAGGGTGCCTTGATGTGGGCGCCGCGGTGAGTG  
GCGACGGCGCGGCTTGTCGCGCCCTGGTAGATTGCCTGGCCGTAGGCCAGCCATTTTTGAGCGGCCAGC  
GGCCGCGATAGGCCGACGCGAAGCGGCGGGCGTAGGGAGCGCAGCGACCGAAGGGTAGGCGCTTTTTGC  
AGCTCTTCGGCTGTGCGCTGGCCAGACAGTTATGCACAGGCCAGGCGGGTTTTAAGAGTTTTAATAAGTT  
TTAAAGAGTTTTAGGCGGAAAAATCGCCTTTTTTCTCTTTTATATCAGTCACTTACATGTGTGACCGGTT  
CCCAATGTACGGCTTTGGGTTCCTAATGTACGGGTTCGGTTCCCAATGTACGGCTTTGGGTTCCTAATG  
TACGTGCTATCCACAGGAAAGAGACCTTTTCGACCTTTTCCCCTGCTAGGGCAATTTGCCCTAGCATCT  
GCTCCGTACATTAGGAACCGGCGGATGCTTCGCCCTCGATCAGGTTGCGGTAGCGCATGACTAGGATCGG  
GCCAGCTGCCCCGCTCCTCCTTCAAATCGTACTCCGGCAGGTCAATTGACCCGATCAGCTTGCGCACG  
GTGAAACAGAACTTCTTGAACCTCTCCGGCGCTGCCACTGCGTTCGTAGATCGTCTTGAACAACCATCTGG  
CTTCTGCCTTGCTGCGGCGCGGCGTGCCAGGCGGTAGAGAAAACGGCCGATGCCGGGATCGATCAAAAA  
GTAATCGGGGTGAACCGTCAGCACGTCCGGGTCTTGCCCTTCTGTGATCTCGCGGTACATCCAATCAGCT  
AGCTCGATCTCGATGTACTCCGGCCGCCGGTTTTCGCTCTTTACGATCTTGTAGCGGCTAATCAAGGCTT  
CACCTCGGATACCGTCACAGGCGGCCGTCTTGCCCTTCTTCGTACGCTGCATGGCAACGTGCGTGGT  
GTTTAACCGAATGCAGGTTTCTACCAGGTCGTCTTTCTGCTTTCCGCCATCGGCTCGCCGGCAGAACTTG  
AGTACGTCCGCAACGTGTGGACGGAACACGCGGCCGGGCTTGTCTCCCTTCCCTTCCCGGTATCGGTTCA  
TGGATTTCGGTTAGATGGGAAACGCCCATCAGTACCAGGTCGTAATCCACACACTGGCCATGCCGGCCGG  
CCCTGCGGAAACCTCTACGTGCCCGTCTGGAAGCTCGTAGCGGATCACCTCGCCAGCTCGTCGGTCACGC  
TTTCACAGACGGAACCGGCCACGTCCATGATGCTGCGACTATCGCGGTGCCACGTATAGAGCATCG  
GAACGAAAAAATCTGGTTGCTCGTCGCCCTTGGGCGGCTTCCTAATCGACGGCGCACCGGCTGCCGGCGG

TTGCCGGGATTCTTTGCGGATTTCGATCAGCGGCCGCTTGCCACGATTACCGGGGCGTGCTTCTGCCTCG  
ATGCGTTGCCGCTGGGCGGCCGTGCGCGGCCCTCAACTTCTCCACCAGGTCATCACCCAGCGCCGCGCCGA  
TTTGTACCGGGCCGGATGGTTTTCGACCGTACGCCGATTTCCTCGGGCTTGGGGGTTCCAGTGCCATTGC  
AGGGCCGGCAGACAACCCAGCCGCTTACGCCTGGCCAACCGCCCGTTCCCTCCACACATGGGGCATTCCAC  
GGCGTCGGTGCCTGGTTGTTCTTGATTTTCCATGCCGCCCTCCTTTAGCCGCTAAAATTCATCTACTCATT  
TATTCATTTGCTCATTTACTCTGGTAGCTGCGCGATGTATTTCAGATAGCAGCTCGGTAATGGTCTTGCCT  
TGGCGTACCGCGTACATCTTCAGCTTGGTGTGATCCTCCGCCGGCAACTGAAAGTTGACCCGCTTCATGG  
CTGGCGTGTCTGCCAGGCTGGCCAACGTTGCAGCCTTGTGCTGCGTGCGCTCGGACGGCCGGCACTTAG  
CGTGTTTGTGCTTTTGTCTCATTTTCTCTTTACCTCATTAACCTCAAATGAGTTTTGATTTAATTTACGCGG  
CCAGCGCCTGGACCTCGCGGGCAGCGTCGCCCTCGGGTTCTGATTCAAGAACGGTTGTGCCGGCGGCGGC  
AGTGCTTGGGTAGCTCAGCGCTGCGTGATACGGGACTCAAGAATGGGCAGCTCGTACCCGGCCAGCGCC  
TCGGCAACCTCACCGCCGATGCGCGTGCCCTTTGATCGCCCGCGACACGACAAAGGCCGCTTGATAGCCTTC  
CATCCGTGACCTCAATGCGCTGCTTAACCAGCTCCACCAGGTCGGCGGTGGCCCATATGTCGTAAGGGCT  
TGGCTGCACCGGAATCAGCACGAAGTCGGCTGCCTTGATCGCGGACACAGCCAAGTCCGCCGCTTGGGGC  
GCTCCGTCGATCACTACGAAGTCGCGCCGGCCGATGGCCTTCACGTGCGGGTCAATCGTCGGGCGGTGCGA  
TGCCGACAACGGTTAGCGGTTGATCTTCCCGCACGGCCGCCAATCGCGGGCACTGCCCTGGGGATCGGA  
ATCGACTAACAGAACATCGGCCCCGGCGAGTTGCAGGGCGCGGGCTAGATGGGTTGCGATGGTCTGCTTG  
CCTGACCCGCTTTTCTGGTTAAGTACAGCGATAACCTTCATGCGTTCCCTTGCGTATTTGTTTATTTAC  
TCATCGCATCATATACGCAGCGACCGCATGACGCAAGCTGTTTTACTCAAATACACATCACCTTTTTAGA  
CGGCGGCGCTCGGTTTCTTCAGCGGCCAAGCTGGCCGGCCAGGCCGCCAGCTTGGCATCAGACAAACCGG  
CCAGGATTTTCATGCAGCCGACGGTTGAGACGTGCGCGGGCGGCTCGAACACGTACCCGGCCGCGATCAT  
CTCCGCCTCGATCTCTTCGGTAATGAAAAACGGTTTCGTCTTGCCGCTCCTGGTGCGGTTTCATGCTTGTT  
CCTCTTGGCGTTTCATCTCGGCGGCCGCCAGGGCGTCGGCTCGGTCAATGCGTCCTCACGGAAGGCACC  
GCGCCGCTTGGCCTCGGTGGGCGTCACTTCCTCGCTGCGCTCAAGTGC CGGTACAGGGTCGAGCGATGC  
ACGCCAAGCAGTGCAGCCGCTCTTTTCAGGTGCGGCCCTTCCTGGTCGATCAGCTCGCGGGCGTGCGCGA  
TCTGTGCCGGGGTGAGGGTAGGGCGGGGGCCAACTTCACGCCTCGGGCCTTGGCGGCCCTCGCGCCCGCT  
CCGGGTGCGGTGCGATGATTAGGAACGCTCGAACTCGGCAATGCCGGCGAACACGGTCAACACCATGCGG  
CCGGCCGGCGTGGTGGTGTGCGGCCACGGCTCTGCCAGGCTACGAGGCCCGCGCGGCCCTCCTGGATGC  
GCTCGGCAATGTCCAGTAGGTGCGGGTGCTGCGGGCCAGGCGGTCTAGCCTGGTCACTGTCAACACGTC  
GCCAGGGCGTAGGTGGTCAAGCATCCTGGCCAGCTCCGGCGGTGCGGCCTGGTGCCGGTGATCTTCTCG  
GAAACAGCTTGGTGCAGCCGGCCGCGTGCAGTTCGGCCCGTTGGTTGGTCAAGTCTGGTTCGTGCGTGC  
TGACGCGGGCATAGCCAGCAGGCCAGCGCGGCGCTCTTGTTTCATGGCGTAATGTCTCCGGTTCTAGTC  
GCAAGTATTCTACTTTATGCGACTAAAACACGCGACAAGAAAACGCCAGGAAAAGGGCAGGGCGGCAGCC  
TGTCGCGTAACCTTAGGACTTGTGCGACATGTGTTTTTCAAGAAGCGGTGCACTGAACGTGAGAAGCCGA  
CTGCACTATAGCAGCGGAGGGGTTGGATCAAAGTACTTTGATCCCGAGGGGAACCCTGTGGTTGGCATGC  
ACATACAAATGGACGAACGGATAAACCTTTTCACGCCCTTTTAAATATCCGTTATTCTAATAAACGCTCT  
TTTCTCTTAGGTTTACCCGCCAATATATCCTGTCAAACACTGATAGTTTAAACTGAAGCGGGAAACGAC  
AATCTGATCCAAGCTCAAGCTAAGCTTGAGCTCTGCATGCCTGCAGGTCCCCAGATTAGCCTTTTCAATT  
TCAGAAAGAAATGCTAACCCACAGATGGTTAGAGAGGCTTACGCAGCAGGTCTCATCAAGACGATCTACCC  
GAGCAATAATCTCCAGGAAATCAAATACCTTCCCAAGAAGGTTAAAGATGCAGTCAAAAGATTTCAGGACT  
AACTGCATCAAGAACACAGAGAAAGATATATTTCTCAAGATCAGAAGTACTATTCCAGTATGGACGATTC  
AAGGCTTGCTTCACAAACCAAGGCAAGTAATAGAGATTGGAGTCTCTAAAAAGGTAGTTCCCACTGAATC  
AAAGGCCATGGAGTCAAAGATTCAAATAGAGGACCTAACAGAACTCGCCGTAAAGACTGGCGAACAGTTTC  
ATACAGAGTCTCTTACGACTCAATGACAAGAAGAAAATCTTCGTCAACATGGTGGAGCACGACACACTTG

TCTACTCCAAAAATATCAAAGATACAGTCTCAGAAGACCAAAGGGCAATTGAGACTTTTCAACAAAGGGT  
AATATCCGGAAACCTCCTCGGATTCCATTGCCCAGCTATCTGTCACTTTATTGTGAAGATAGTGGAAAAG  
GAAGGTGGCTCCTACAAATGCCATCATTGCGATAAAGGAAAGGCCATCGTTGAAGATGCCTCTGCCGACA  
GTGGTCCCAAAGATGGACCCCCACCCACGAGGAGCATCGTGAAAAAGAAGACGTTCCAACCACGTCTTC  
AAAGCAAGTGGATTGATGTGATATCTCCACTGACGTAAGGGATGACGCACAATCCCACATATCCTTCGCAA  
GACCTTTCCTCTATATAAGGAAGTTCATTTTCAATTTGGAGAGAACACGGGGGACTCTAGAGGATCCAAGGA  
GATATAAGCCGCCACCATGGATTACAAGGACGATGATGACAAGGACTACAAGGACGATGACGATAAGGAC  
TATAAGGATGACGATGACAAGGATTACGCCGAGGATGGATGATACTAGCGGACAAACTTTCGTTTCTGTG  
AACCTTTCTGACGAAAGCAACACGGCAAGCACTAAAGTTGAAAACGTAAAATCGGAAGCGGATCGCTTGG  
AGTTTTTACGTAAAATGAATCCCTTTTATTGTTGACGCTCTGGTGCGGAAAACCAATTATCAGGGTGCTCG  
CTTTCGCGCAAGAATAATAGGAGTGTGCGTGGATTGTGGTAGAAAACACGACAAGGCGCTCAAGACTGAA  
CGTAAGTGTAAAGTCAACAACACGCAATCTGCGAACGAGGTGGCGCATATGTTGATGCACGATCCCGTTA  
AGTATTTGAACAAAAGAAAGGCTAGAGCCTTTTCTAACGCAGAGATGTTTGCGATTGAACTGGTTTCGTA  
CACCAAGGAAAGGCAATTGGCGGTGCGATTTAGCCGCTGAAAGGGAGAAGACGAGACTGGCTCGTAGACAC  
CCAATACGTTCTCCGGAAGAACTCCGGAACATTATAAATTCGGTATGACTGCTAAGGCAATGTTACCGG  
ACATCAACGCCGTAGACGTTGGTGATAACGAGGAACTTCGTGCGAGTACCCAGTGAGTCTGAGTGTTTC  
TGGCGGAGTTCTCCGTGAACACCACCTTCATCTGACCTCTTCCCTAATGATATCCCGCGGCCATGCTAGAG  
TCCGCAAAAATCACCAGTCTCTCTCTACAAATCTATCTCTCTATTTTTCTCCAGAATAATGTGTGAGT  
AGTTCCAGATAAGGGAATTAGGGTTCTTATAGGGTTTCGCTCATGTGTTGAGCATATAAGAAACCCTTA  
GTATGTATTTGTATTTGTAATACTTCTATCAATAAAATTTCTAATTCCTAAAACCAAATCCAGTGAC  
CTGCAGGCATGCGACGTCG

### Sequence of pH7LIC3.1.1-p23M5 (35S- p23M5)

GGGTACCCTCGAATTATCATACATGAGAATTAAGGGAGTCACGTTATGACCCCGCCGATGACGCGGGACA  
AGCCGTTTTACGTTTGGAACTGACAGAACC GCAACGTTGAAGGAGCCACTGAGCCGCGGGTTTCTGGAGT  
TTAATGAGCTAAGCACATACGTCAGAAACCATTATTGCGCGTTCAAAAGTCGCCTAAGGTCACTATCAGC  
TAGCAAATATTTCTTGTCAAAAATGCTCCACTGACGTTCCATAAATTCCCCTCGGTATCCAATTAGAGTC  
TCATATTTACTCTCAACTCGAATCCCCCTATGAAAAAGCCTGAACTCACCGCGACGTCTGTGAGAAGT  
TTCTGATCGAAAAGTTCGACAGCGTCTCCGACCTGATGCAGCTCTCGGAGGGCGAAGAATCTCGTGCTTT  
CAGCTTCGATGTAGGAGGGCGTGATATGTCTGCGGGTAAATAGCTGCGCCGATGGTTTCTACAAAGAT  
CGTTATGTTTATCGGCACTTTGCATCGGCCGCGCTCCCGATTCCGGAAGTGCTTGACATTGGGGAGTTCA  
GCGAGAGCCTGACCTATTGCATCTCCGCGCGTGACAGGGTGTCACGTTGCAAGACCTGCCTGAAACCGA  
ACTGCCCGCTGTTCTTCAGCCGGTCGCGGAGGCTATGGATGCTATCGCTGCGGCCGATCTTAGCCAGACG  
AGCGGGTTCGGCCCATTCGGACCGCAAGGAATCGGTCAATACACTACATGGCGTGATTTATATGCGCGA  
TTGCTGATCCCCATGTGTATCACTGGCAAACGTGATGGACGACACCGTCAGTGCGTCCGTCGCGCAGGC  
TCTCGATGAGCTGATGCTTTGGGCGAGGACTGCCCCGAAGTCCGGCACTCGTGACGCGGATTTCGGCTCC  
AACAATGTCTTGACGGACAATGGCCGCATAACAGCGGTCAATTGACTGGAGCGAGGCGATGTTTCGGGGATT  
CCCAATACGAGGTGCCAACATCTTCTTCTGGAGGCCGTGGTTGGCTTGATGGAGCAGCAGACGCGCTA  
CTTCGAGCGGAGGCATCCGGAGCTTGACAGGATCGCCAAGGCTCCGGGCGTATATGCTCCGCATTGGTCTT  
GACCAACTCTATCAGAGCTTGGTTGACGGCAATTTTCGATGATGCAGCTTGGGCGCAGGGTCGATGCGACG  
CAATCGTCCGATCCGGAGCCGGGACTGTGCGGGCTACACAAATCGCCCGAGAAGCGCGGCCGTCTGGAC  
CGATGGCTGTGTAGAAGTACTCGCCGATAGTGAAACCGACGCCCCAGCACTCGTCCGAGGGCAAAGGAA  
TAGAGTAGATGCCGACCGAACAAGAGCTGATTTGAGAACGCCTCAGCCAGCAACTCGCGCGAGCCTAGC  
AAGGCAAAATGCGAGAGAACGGCCTTACGCTTGGTGGCACAGTTCTCGTCCACAGTTCGCTAAGCTCGCTC



GGCTGGGTGCGGGGAGGGCCGGTCGCAGTGATTGAGGAATTAATTCCTAGAGTCAAGCAGATCGTTCAA  
ACATTTGGCAATAAAGTTTCTTAAGATTGAATCCTGTTGCCGGTCTTGCGATGATTATCATATAATTTCT  
GTTGAATTACGTTAAGCATGTAATAATTAACATGTAATGCATGACGTTATTTATGAGATGGGTTTTTATG  
ATTAGAGTCCCGCAATTATACATTTAATACGCATAGAAAACAAAATATAGCGCGCAAACCTAGGATAAAT  
TATCGCGCGCGGTGTCTATGTTACTAGATCGACCGGCATGCAAGCTGATAATTCAATTCGGCGTTAA  
TTCAGTACATTAAAAACGTCCGCAATGTGTTATTAAGTTGTCTAAGCGTCAATTTGTTTACACCACAATA  
TATCCTGCCACCAGCCAGCCAACAGCTCCCCGACCGGCAGCTCGGCACAAAATCACCACCTCGATACAGGC  
AGCCCATCAGTCCGGGACGGCGTCAGCGGGAGAGCCGTTGTAAGGCGGCAGACTTTGCTCATGTTACCGA  
TGCTATTCGGAAGAACGGCAACTAAGCTGCCGGGTTTGAAACACGGATGATCTCGCGGAGGGTAGCATGT  
TGATTGTAACGATGACAGAGCGTTGCTGCCTGTGATCAATTCGGGCACGAACCCAGTGGACATAAGCCTC  
GTTCCGTTTCGTAAGCTGTAATGCAAGTAGCGTAAGTCCGTCACGCAACTGGTCCAGAACCTTGACCGAA  
CGCAGCGGTGGTAACGGCGCAGTGGCGGTTTTTCATGGCTTCTTGTTATGACATGTTTTTTTTGGGGTACAG  
TCTATGCCTCGGGCATCCAAGCAGCAAGCGCGTTACGCCGTGGGTTCGATGTTTGATGTTATGGAGCAGCA  
ACGATGTTACGCAGCAGGGCAGTCGCCCTAAAACAAAGTTAAACATCATGGGGGAAGCGGTGATCGCCGA  
AGTATCGACTCAACTATCAGAGGTAGTTGGCGTCATCGAGCGCCATCTCGAACCGACGTTGCTGGCCGTA  
CATTTGTACGGCTCCGCAGTGGATGGCGGCCTGAAGCCACACAGTGATATTGATTTGCTGGTTACGGTGA  
CCGTAAGGCTTGATGAAACAACGCGCGAGCTTTGATCAACGACCTTTTGAAACTTCGGCTTCCCTTG  
AGAGAGCGAGATTCTCCGCGCTGTAGAAGTCACCATTGTTGTGCACGACGACATCATTCGTTGGCGTTAT  
CCAGCTAAGCGCGAACTGCAATTTGGAGAATGGCAGCGCAATGACATTCTTGACAGGTATCTTCGAGCCAG  
CCACGATCGACATTGATCTGGCTATCTTGCTGACAAAAGCAAGAGAACATAGCGTTGCCTTGGTAGGTCC  
AGCGGCGGAGGAACCTTTTGATCCGTTCTGAACAGGATCTATTTGAGGCGCTAAATGAAACCTTAACG  
CTATGGAACCTCGCCGCCGACTGGGCTGGCGATGAGCGAAATGTAGTGCTTACGTTGTCCCGCATTTGGT  
ACAGCGCAGTAACCGGCAAAATCGCGCCGAAGGATGTCGCTGCCGACTGGGCAATGGAGCGCTGCCGGC  
CCAGTATCAGCCCGTCATACTTGAAGCTAGACAGGCTTATCTTGACAGAAGAAGATCGCTTGGCCTCG  
CGCGCAGATCAGTTGGAAGAATTTGTCCACTACGTGAAAGGCGAGATCACCAAGGTAGTCGGCAAATAAT  
GTCTAGCTAGAAATTCGTTCAAGCCGACGCCGCTTCGCCGGCGTTAACTCAAGCGATTAGATGCACTAAG  
CACATAATTGCTCACAGCCAAACTATCAGGTCAAGTCTGCTTTTATTATTTTTAAGCGTGCATAATAAGC  
CCTACACAAATTGGGAGATATATCATGCATGACCAAAATCCCTTAACGTGAGTTTTTCGTTCCACTGAGCG  
TCAGACCCCGTAGAAAAGATCAAAGGATCTTCTTGAGATCCTTTTTTTCTGCGCGTAATCTGCTGCTTGC  
AAACAAAAAAACCACCGCTACCAGCGGTGGTTTTGTTTGCCGGATCAAGAGCTACCAACTCTTTTTCCGAA  
GGTAACTGGCTTCAGCAGAGCGCAGATACCAAATACTGTCTTCTAGTGTAGCCGTAGTTAGGCCACCAC  
TTCAAGAACTCTGTAGCACCGCCTACATACCTCGCTCTGCTAATCCTGTTACCAGTGGCTGCTGCCAGTG  
GCGATAAGTCGTGTCTTACCGGTTGGACTCAAGACGATAGTTACCGGATAAGGCGCAGCGGTCCGGGCTG  
AACGGGGGGTTCTGTGCACACAGCCCAGCTTGAGCGAACGACCTACACCGAACTGAGATACCTACAGCGT  
GAGCTATGAGAAAGCGCCACGCTTCCCGAAGGGAGAAAGGCGGACAGGTATCCGGTAAGCGGCAGGGTCG  
GAACAGGAGAGCGCACGAGGGAGCTTCCAGGGGGAAACGCCTGGTATCTTTATAGTCCTGTCGGGTTTCG  
CCACCTCTGACTTGAGCGTCGATTTTTGTGATGCTCGTCAGGGGGCGGAGCCTATGAAAAACGCCAGC  
AACGCGGCCTTTTTACGGTTCTTGCCCTTTTGCTGGCCTTTTGCTCACATGTTCTTTCTGCGTTATCCC  
CTGATTCTGTGGATAACCGTATTACCGCCTTTGAGTGAGCTGATACCGCTCGCCGACCCGAACGACCGA  
GCGCAGCGAGTCAGTGAGCGAGGAAGCGGAAGAGCGCCTGATGCGGTATTTTCTCCTTACGCATCTGTGC  
GGTATTTACACCGCATATGGTGCATCTCAGTACAATCTGCTCTGATGCCGCATAGTTAAGCCAGTATA  
CACTCCGCTATCGCTACGTGACTGGGTGATGGCTGCGCCCCGACACCCGCCAACACCCGCTGACGCGCCC  
TGACGGGCTTGTCTGCTCCCGGCATCCGCTTACAGACAAAGCTGTGACCGTCTCCGGGAGCTGCATGTGTC  
AGAGGTTTTACCGTCATACCGAAACGCGCGAGGCAGGGTGCCTTGATGTGGGCGCCGGCGGTGAGTG

GCGACGGCGGGCTTGTCGCGCCCTGGTAGATTGCCTGGCCGTAGGCCAGCCATTTTTGAGCGGCCAGC  
GGCCGCGATAGGCCGACGCGAAGCGCGGGGCGTAGGGAGCGCAGCGACCGAAGGGTAGGCGCTTTTTGC  
AGCTCTTCGGCTGTGCGCTGGCCAGACAGTTATGCACAGGCCAGGCGGGTTTTAAGAGTTTTAATAAGTT  
TTAAAGAGTTTTAGGCGGAAAAATCGCCTTTTTTCTCTTTTATATCAGTCACTTACATGTGTGACCGGTT  
CCCAATGTACGGCTTTGGGTTCCTAATGTACGGGTTCCGGTTCCCAATGTACGGCTTTGGGTTCCTAATG  
TACGTGCTATCCACAGGAAAGAGACCTTTTCGACCTTTTCCCCTGCTAGGGCAATTTGCCCTAGCATCT  
GCTCCGTACATTAGGAACCGGCGGATGCTTCGCCCTCGATCAGGTTGCGGTAGCGCATGACTAGGATCGG  
GCCAGCTGCCCCGCTCCTCCTTCAAATCGTACTCCGGCAGGTCAATTTGACCCGATCAGCTTGCGCACG  
GTGAAACAGAACTTCTTGAACCTCTCCGGCGCTGCCACTGCGTTCGTAGATCGTCTTGAACAACCATCTGG  
CTTCTGCCTTGCTGCGCGCGGGCGTGCCAGGCGGTAGAGAAAACGGCCGATGCCGGGATCGATCAAAAA  
GTAATCGGGGTGAACCGTCAGCACGTCCGGGTCTTGCCCTTCTGTGATCTCGCGGTACATCCAATCAGCT  
AGCTCGATCTCGATGTACTCCGGCCGCCCGGTTTCGCTCTTTACGATCTTGTAGCGGCTAATCAAGGCTT  
CACCTCGGATACCGTCACCAGGCGGCCGTTCTTGCCCTTCTTCGTACGCTGCATGGCAACGTGCGTGGT  
GTTTAACCGAATGCAGGTTCTACCAGTCTGCTTTTCTGCTTTCCGCCATCGGCTCGCCGGCAGAACTTG  
AGTACGTCCGCAACGTGTGGACGGAACACGCGGCCGGGCTTGTCTCCCTTCCCTTCCCGGTATCGGTTCA  
TGGATTTCGGTTAGATGGGAAACCGCCATCAGTACCAGGTCGTAATCCACACACTGGCCATGCCGGCCGG  
CCCTGCGGAAACCTCTACGTGCCCCTCTGGAAGCTCGTAGCGGATCACCTCGCCAGCTCGTCGGTCACGC  
TTTCGACAGACGGAACCGGCCACGTCCATGATGCTGCGACTATCGCGGGTGCCACGTATAGAGCATCG  
GAACGAAAAAATCTGGTTGCTCGTCGCCCTTGGGCGGCTTCCTAATCGACGGCGCACCGGCTGCCGGCGG  
TTGCCGGGATTCTTTGCGGATTTCGATCAGCGGCCGCTTGCCACGATTCACCGGGGCGTGCTTCTGCCTCG  
ATGCGTTGCCGTGGGCGGCCCTGCGCGGCCCTTCAACTTCTCCACCAGGTCATCACCCAGCGCCGCGCCGA  
TTTGTACCGGGCCGGATGGTTTTCGACCGTCACGCCGATTCCTCGGGCTTGGGGGTTCCAGTGCCATTGC  
AGGGCCGGCAGACAACCCAGCCGCTTACGCCTGGCCAACCGCCCGTTCTCCACACATGGGGCATTCAC  
GGCGTCGGTGCTGTTTGTCTTGTATTTCCATGCCGCCTCCTTTAGCCGCTAAAATTCATCTACTCATT  
TATTCAATTTGCTCATTTACTCTGGTAGCTGCGCGATGTATTAGATAGCAGCTCGGTAATGGTCTTGCCCT  
TGGCGTACCGCGTACATCTTCAGCTTGGTGTGATCCTCCGCCGGCAACTGAAAGTTGACCCGCTTCATGG  
CTGGCGTGCTGCCAGGCTGGCCAACGTTCGAGCCTTGCTGCTGCGTGCGCTCGGACGGCCGGCACTTAG  
CGTGTTTGTGCTTTTGCTCATTTTCTCTTTACCTCATTAACCTCAAATGAGTTTTGATTTAATTTACGCG  
CCAGCGCTGGACCTCGCGGGCAGCGTCGCCCTCGGGTTCTGATTCAAGAACGGTTGTGCCGGCGGGCGG  
AGTGCTTGGGTAGCTCAGCGCTGCGTGATACGGGACTCAAGAATGGGCAGCTCGTACCCGGCCAGCGCC  
TCGGCAACCTCACCGCCGATGCGCGTGCCCTTTGATCGCCCGGACACGACAAAAGGCCGCTTGTAGCCTTC  
CATCCGTGACCTCAATGCGCTGCTTAACCAGCTCCACCAGGTCGGCGGTGGCCCATATGTCGTAAGGGCT  
TGGCTGCACCGGAATCAGCACGAAGTCGGCTGCCTTGATCGCGGACACAGCCAAGTCCGCCGCTGGGGC  
GCTCCGTGATCACTACGAAGTCGCGCCGGCCGATGGCCTTCACGTGCGGGTCAATCGTCGGGCGGTGCA  
TGCCGACAACGGTTAGCGGTTGATCTTCCCGCACGGCCGCCAATCGCGGGCACTGCCCTGGGGATCGGA  
ATCGACTAACAGAACATCGGCCCCGGCGAGTTGCAGGGCGCGGGCTAGATGGGTTGCGATGGTCTGCTTG  
CCTGACCCGCCTTTCTGGTTAAGTACAGCGATAACCTTCATGCGTTCCCTTGCGTATTTGTTTATTAC  
TCATCGCATCATATACGACGACCGCATGACGCAAGCTGTTTTACTCAAATACACATCACCTTTTTAGA  
CGGCGGCGCTCGGTTTCTTCAGCGGCCAAGCTGGCCGGCCAGGCCGCCAGCTTGGCATCAGACAAACCGG  
CCAGGATTTTCATGACCGCGACGGTTGAGACGTGCGCGGGCGGCTCGAACACGTACCCGGCCGCGATCAT  
CTCCGCTCGATCTCTTCGGTAATGAAAAACGGTTTCGTCTGGCCGTCTGGTGCGGTTTCATGCTTGTT  
CCTCTTGCGGTTTCAATCTCGGCGGCCGCCAGGGCGTCGGCTCGGTCAATGCGTCTCACGGAAGGCACC  
GCGCCGCTGGCCTCGGTGGGCGTCACTTCCTCGCTGCGCTCAAGTGCAGGTTACAGGGTCGAGCGATGC  
ACGCCAAGCAGTGCAGCCGCTCTTTCAGGTGCGGCCTTCCTGGTCGATCAGCTCGCGGGCGTGCGCGA

TCTGTGCCGGGTGAGGGTAGGGCGGGGCCAAACTTCACGCCTCGGGCCTTGGCGGCCTCGCGCCCGCT  
CCGGGTGCGGTTCGATGATTAGGGAACGCTCGAACTCGGCAATGCCGGCGAACACGGTCAACACCATGCGG  
CCGGCCGGCGTGGTGGTGTGCGGCCACGGCTCTGCCAGGCTACGCAGGCCCGCGCCGGCCTCCTGGATGC  
GCTCGGCAATGTCCAGTAGGTGCGGGTGTGCGGGCCAGGCGGTCTAGCCTGGTCACTGTCAACAACGTC  
GCCAGGGCGTAGGTGGTCAAGCATCCTGGCCAGCTCCGGGCGGTGCGGCCTGGTGCCGGTGATCTTCTCG  
GAAAACAGCTTGGTGACGCCGGCCGGTGCAGTTCGGCCCGTTGGTTGGTCAAGTCCTGGTCGTGCGGTGC  
TGACGCGGGCATAGCCCAGCAGGCCAGCGCGGCGCTCTTGTTTCATGGCGTAATGTCTCCGGTTCTAGTC  
GCAAGTATTCTACTTTATGCGACTAAAACACGCGACAAGAAAACGCCAGGAAAAGGGCAGGGCGGCAGCC  
TGTCGCGTAACCTTAGGACTTGTGCGACATGTCGTTTTTCAAGACGGCTGCACTGAACGTCAGAAGCCGA  
CTGCACTATAGCAGCGAGGGGTGGATCAAAGTACTTTGATCCCGAGGGGAACCTGTGGTTGGCATGC  
ACATACAAATGGACGAACGGATAAACCTTTTACGCCCTTTTAAATATCCGTTATTCTAATAAACGCTCT  
TTTCTCTTAGGTTTACCCGCCAATATATCCTGTCAAACACTGATAGTTTAACTGAAGCGGGAAACGAC  
AATCTGATCCAAGCTCAAGCTAAGCTTGAGCTCTGCATGCCTGCAGGTCCCCAGATTAGCCTTTTCAATT  
TCAGAAAGAATGCTAACCCACAGATGGTTAGAGAGGCTTACGCAGCAGGTCTCATCAAGACGATCTACCC  
GAGCAATAATCTCCAGGAAATCAAATACCTTCCCAAGAAGGTTAAAGATGCAGTCAAAAGATTCAGGACT  
AACTGCATCAAGAACACAGAGAAAGATATATTTCTCAAGATCAGAAGTACTATTCCAGTATGGACGATTC  
AAGGCTTGCTTCACAAACCAAGGCAAGTAATAGAGATTGGAGTCTCTAAAAAGGTAGTTCCCACTGAATC  
AAAGGCCATGGAGTCAAAGATTCAAATAGAGGACCTAACAGAACTCGCCGTAAAGACTGGCGAACAGTTC  
ATACAGAGTCTCTTACGACTCAATGACAAGAAGAAAATCTTCGTCAACATGGTGGAGCACGACACACTTG  
TCTACTCCAAAAATATCAAAGATACAGTCTCAGAAGACCAAAGGGCAATTGAGACTTTTCAACAAAGGT  
AATATCCGGAAACCTCCTCGGATTCCATTGCCAGCTATCTGTCACTTTATTGTGAAGATAGTGGAAAAG  
GAAGGTGGCTCCTACAAATGCCATCATTGCGATAAAGGAAAGGCCATCGTTGAAGATGCCTCTGCCGACA  
GTGGTCCCAAGATGGACCCCCACCCACGAGGAGCATCGTGGAAGAAAGACGTTCCAACCACGTCTTC  
AAAGCAAGTGGAATTGATGTGATATCTCCACTGACGTAAGGGATGACGCACAATCCCACTATCCTTCGCAA  
GACCCTTCTCTATATAAGGAAGTTCATTTTCATTTGGAGAGAACACGGGGGACTCTAGAGGATCCAAGGA  
GATATAAGCCGCCACCATGGATTACAAGGACGATGATGACAAGGACTACAAGGACGATGACGATAAGGAC  
TATAAGGATGACGATGACAAGGATTACGCCGAGGATGGATGATACTAGCGGACAACTTTCGTTTCTGTG  
AACCTTTCTGACGAAAGCAACACGGCAAGCACTAAAGTTGAAAACGTAAAATCGGAAGCGGATCGCTTGG  
AGTTTTTACGTAAAATGAATCCCTTTATTGTTGACGCTCTGGTGCGGAAAACCAATTATCAGGGTGCTCG  
CTTTCGCGCAAGAATAATAGGAGTGTGCGTGGATTGTGGTAGAAAACACGACAAGGCGCTCAAGACTGAA  
CGTAAGTGTAAGGTCAACAACACGCAATCTCAGAACGCGGCGGCATATGTTGATGCACGATCCCGTTA  
AGTATTTGAACAAAAGAAAGGCTAGAGCCTTTTCTAACGCAGAGATGTTTGCGATTGAACTGGTTTCGTA  
CACCAAGGAAAGGCAATTGGCGGTGATTTAGCCGCTGAAAGGGAGAAGACGAGACTGGCTCGTAGACAC  
CCAATACGTTCTCCGGAAGAACTCCGGAACATTATAAATTCGGTATGACTGCTAAGGCAATGTTACCGG  
ACATCAACGCCGTAGACGTTGGTGATAACGAGGAACTTCGTGCGAGTACCCAGTGAGTCTGAGTGTTTC  
TGGCGGAGTTCTCCGTGAACACCACTTCATCTGACCTAATGATATCCCGCGGCCATGCTAGAGTCCGCAA  
AAATCACCAGTCTCTCTTACAAATCTATCTCTCTATTTTTCTCCAGAATAATGTGTGAGTAGTTCCC  
AGATAAGGGAATTAGGGTTCTTATAGGGTTTCGCTCATGTGTTGAGCATATAAGAAACCCTTAGTATGTA  
TTTGTATTTGTAAAATACTTCTATCAATAAAATTTCTAATTCCTAAAACCAAAATCCAGTGACCTGCAGG  
CATGCGACGTCG

### Sequence of pH7LIC3.1.1-p23M6 (35S- p23M6)

GGGTACCTCGAATTATCATACATGAGAATTAAGGGAGTCACGTTATGACCCCGCCGATGACGCGGGACA  
AGCCGTTTTACGTTTGGAAGTACAGAACCGCAACGTTGAAGGAGCCACTGAGCCGCGGGTTTCTGGAGT

TTAATGAGCTAAGCACATACGTCAGAAACCATATTATGCGCGTTCAAAAGTCGCCTAAGGTCACATATCAGC  
TAGCAAATATTTCTTGTCAAAAATGCTCCACTGACGTTCCATAAATCCCCCTCGGTATCCAATTAGAGTC  
TCATATTTACTCTCAACTCGAATCCCCCTATGAAAAAGCCTGAACTCACCGCGACGTCTGTGCGAGAAGT  
TTCTGATCGAAAAGTTCGACAGCGTCTCCGACCTGATGCAGCTCTCGGAGGGCGAAGAATCTCGTGCTTT  
CAGCTTCGATGTAGGAGGGCGTGGATATGTCTGCGGGTAAATAGCTGCGCCGATGGTTTCTACAAAGAT  
CGTTATGTTTATCGGCACTTTGCATCGGCCGCGCTCCCGATTCCGGAAGTGCTTGACATTGGGGAGTTCA  
GCGAGAGCCTGACCTATTGCATCTCCCGCCGTGCACAGGGTGTACGTTGCAAGACCTGCCTGAAACCGA  
ACTGCCCGCTGTTCTTCAGCCGGTCGCGGAGGCTATGGATGCTATCGCTGCGGCCGATCTTAGCCAGACG  
AGCGGGTTCGGCCCATTTCGGACCGCAAGGAATCGGTCAATACACTACATGGCGTGATTTTCATATGCGCGA  
TTGCTGATCCCCATGTGTATCACTGGCAAACCTGTGATGGACGACACCGTCAGTGCGTCCGTCGCGCAGGC  
TCTCGATGAGCTGATGCTTTGGGCGAGGACTGCCCCGAAGTCCGGCACTCGTGACGCGGATTTCGGCTCC  
AACAAATGTCTGACGGACAATGGCCGCATAACAGCGGTCATTGACTGGAGCGAGGCGATGTTTCGGGGATT  
CCCAATACGAGGTCGCCAACATCTTCTTCTGAGGGCCGTGGTTGGCTTGATGGAGCAGCAGACGCGCTA  
CTTCGAGCGGAGGCATCCGGAGCTTGCAGGATCGCCAAGGCTCCGGGCGTATATGCTCCGCATTGGTCTT  
GACCAACTCTATCAGAGCTTGGTTGACGGCAATTTTCGATGATGCAGCTTGGGCGCAGGGTCGATGCGACG  
CAATCGTCCGATCCGGAGCCGGGACTGTGCGGGCTACACAAATCGCCCGCAGAAGCGCGGCCGTCTGGAC  
CGATGGCTGTGTAGAAGTACTCGCCGATAGTGAAACCGACGCCCCAGCACTCGTCCGAGGGCAAAGGAA  
TAGAGTAGATGCCGACCGAACAAGAGCTGATTTGAGAACGCCTCAGCCAGCAACTCGCGCGAGCCTAGC  
AAGGCAAATGCGAGAGAACGGCCTTACGCTTGGTGGCACAGTTCTCGTCCACAGTTCGCTAAGCTCGCTC  
GGCTGGGTGCGGGGAGGGCCGGTTCGAGTGATTACAGGAATTAATTCCTTAGAGTCAAGCAGATCGTTCAA  
ACATTTGGCAATAAAGTTTCTTAAGATTGAATCCTGTTGCCGGTCTTGCGATGATTATCATATAATTTCT  
GTTGAATTACGTTAAGCATGTAATAATTAACATGTAATGCATGACGTTATTTATGAGATGGGTTTTTATG  
ATTAGAGTCCCGCAATTATACATTTAATACGCGATAGAAAAACAAATATAGCGCGCAAACCTAGGATAAAT  
TATCGCGCGGGTGTATCTATGTTACTAGATCGACCGCATGCAAGCTGATAATTCAATTCGGCGTTAA  
TTCAGTACATTAAAAACGTCCGCAATGTGTTATTAAGTTGTCTAAGCGTCAATTTGTTTACACCACAATA  
TATCTGCCACCAGCCAGCCAACAGCTCCCCGACCGGACGCTCGGCACAAAATCACCCTCGATACAGGC  
AGCCCATCAGTCCGGGACGGCGTCAGCGGGAGAGCCGTTGTAAGGCGGCAGACTTTGCTCATGTTACCGA  
TGCTATTCCGAAGAACGGCAACTAAGCTGCCGGGTTTGAACACGGATGATCTCGCGGAGGGTAGCATGT  
TGATTGTAACGATGACAGAGCGTTGCTGCCTGTGATCAATTGCGGCACGAACCCAGTGACATAAGCCTC  
GTTCCGTTTCGTAAGCTGTAATGCAAGTAGCGTAAGTCCGTCACGCAACTGGTCCAGAACCCTTGACCGAA  
CGCAGCGGTGGTAACGGCGCAGTGGCGGTTTTTCATGGCTTCTTGTTATGACATGTTTTTTTTGGGGTACAG  
TCTATGCCTCGGGCATCCAAGCAGCAAGCGGTTACGCCGTGGGTCGATGTTTGATGTTATGGAGCAGCA  
ACGATGTTACGCAGCAGGGCAGTCGCCCCAAAACAAAGTTAAACATCATGGGGGAAGCGGTGATCGCCGA  
AGTATCGACTCAACTATCAGAGGTAGTTGGCGTCATCGAGCGCCATCTCGAACCGACGTTGCTGGCCGTA  
CATTTGTACGGCTCCGCAGTGATGGCGGCCTGAAGCCACACAGTGATATTGATTTGCTGGTTACGGTGA  
CCGTAAGGCTTGATGAAACAACGCGCGAGCTTTGATCAACGACCTTTTGAAACTTCGGCTTCCCCTGG  
AGAGAGCGAGATTCTCCGCGCTGTAGAAGTCACCATTTGTTGTGCACGACGACATCATTCCTGGCGTTAT  
CCAGCTAAGCGCGAACTGCAATTTGGAGAATGGCAGCGCAATGACATTTCTGCAGGTATCTTCGAGCCAG  
CCACGATCGACATTGATCTGGCTATCTTGCTGACAAAAGCAAGAGAACATAGCGTTGCCTTGGTAGGTCC  
AGCGGCGGAGGAACTCTTTGATCCGTTCTTGAACAGGATCTATTTGAGGCGCTAAATGAAACCTTAACG  
CTATGGAACCTCGCCGCCGACTGGGCTGGCGATGAGCGAAATGTAGTGCTTACGTTGTCCCGCATTTGGT  
ACAGCGCAGTAACCGGCAAAATCGCGCCGAAGGATGTCGCTGCCGACTGGGCAATGGAGCGCCTGCCGGC  
CCAGTATCAGCCCGTCATACTGAAGCTAGACAGGCTTATCTTGACAGAAGAAGAAGATCGCTTGGCCTCG  
CGCGCAGATCAGTTGGAAGAATTTGTCCACTACGTGAAAGGCGAGATCACCAAGGTAGTCGGCAAATAAT

GTCTAGCTAGAAATTCGTTCAAGCCGACGCCGCTTCGCCGGCGTTAACTCAAGCGATTAGATGCACTAAG  
CACATAATTGCTCACAGCCAACTATCAGGTCAAGTCTGCTTTTATTATTTTAAAGCGTGCATAATAAGC  
CCTACACAAATTGGGAGATATATCATGCATGACCAAAATCCCTTAACGTGAGTTTTTCGTCCACTGAGCG  
TCAGACCCCGTAGAAAAGATCAAAGGATCTTCTTGAGATCCTTTTTTCTGCGCGTAATCTGCTGCTTGC  
AAACAAAAAACCACCGCTACCAGCGGTGGTTTGTGGCCGGATCAAGAGCTACCAACTCTTTTTCCGAA  
GGTAACTGGCTTCAGCAGAGCGCAGATACCAAATACTGTCTTCTAGTGTAGCCGTAGTTAGGCCACCAC  
TTCAAGAACTCTGTAGCACCGCTACATACCTCGCTCTGCTAATCCTGTTACCAGTGGCTGCTGCCAGTG  
GCGATAAGTCGTGTCTTACCGGGTTGGACTCAAGACGATAGTTACCGGATAAGGCGCAGCGGTGCGGGCTG  
AACGGGGGGTTTCGTGCACACAGCCCAGCTTGGAGCGAACGACCTACACCGAACTGAGATACCTACAGCGT  
GAGCTATGAGAAAGCGCCACGCTTCCCGAAGGGAGAAAGCGGACAGGTATCCGTAAGCGGCAGGGTCG  
GAACAGGAGAGCGCACGAGGGAGCTTCCAGGGGAAACGCCTGGTATCTTTATAGTCCTGTGCGGGTTTCG  
CCACCTCTGACTTGAGCGTCGATTTTTGTGATGCTCGTCAGGGGGCGGAGCCTATGGAACCGCCAGC  
AACGCGGCCTTTTTACGGTTTCTGGCCTTTTGCTGGCCTTTTGCTCACATGTTCTTCTCGCTTATCCC  
CTGATTCTGTGGATAACCGTATTACCGCCTTTGAGTGAGCTGATACCGCTCGCCGACGCCAACGACCGA  
GCGCAGCGAGTCAGTGAGCGAGGAAGCGGAAGAGCGCCTGATGCGGTATTTTCTCCTTACGCATCTGTGC  
GGTATTTACACCGCATATGGTGCACCTCAGTACAATCTGCTCTGATGCCGCATAGTTAAGCCAGTATA  
CACTCCGCTATCGCTACGTGACTGGGTGCTGGCTGCGCCCCGACACCCGCCAACACCCGCTGACGCGCCC  
TGACGGGCTTGTCTGCTCCCGCATCCGCTTACAGACAAGCTGTGACCGTCTCCGGGAGCTGCATGTGTC  
AGAGGTTTTACCGTCATACCGAAACGCGCGAGGCAGGGTGCCTTGATGTGGGCGCCGGCGGTGAGTG  
GCGACGGCGCGGCTTGTCCGCGCCCTGGTAGATTGCCTGGCCGTAGGCCAGCCATTTTTGAGCGGCCAGC  
GGCCGCGATAGGCCGACGCGAAGCGCGGGGCGTAGGGAGCGCAGCGACCGAAGGGTAGGCGCTTTTTGC  
AGCTCTTCGGCTGTGCGCTGGCCAGACAGTTATGCACAGGCCAGGCGGGTTTTAAGAGTTTTAATAAGTT  
TTAAAGAGTTTTAGGCGGAAAAATCGCCTTTTTTCTCTTTTATATCAGTCACTTACATGTGTGACCGGTT  
CCCAATGTACGGCTTTGGGTTCCCAATGTACGGGTTCGGTTCCCAATGTACGGCTTTGGGTTCCCAATG  
TACGTGCTATCCACAGGAAAGAGACCTTTTCGACCTTTTCCCCTGCTAGGGCAATTTGCCTAGCATCT  
GCTCCGTACATTAGGAACCGGCGGATGCTTCGCCCTCGATCAGGTTGCGGTAGCGCATGACTAGGATCGG  
GCCAGCCTGCCCCGCTCCTCCTTCAAATCGTACTCCGGCAGGTCAATTTGACCCGATCAGCTTGCGCACG  
GTGAAACAGAACTTCTTGAACCTCCTCGGCGCTGCCACTGCGTTCTGTAGATCGTCTTGAACAACCATCTGG  
CTTCTGCCTTGCTGCGGCGGGCGTGCCAGGCGGTAGAGAAAACGGCCGATGCCGGGATCGATCAAAAA  
GTAATCGGGGTGAACCGTCAGCACGTCCGGGTCTTGCCTTCTGTGATCTCGCGGTACATCCAATCAGCT  
AGCTCGATCTCGATGTACTCCGGCCGCCGGTTTCGCTCTTTACGATCTTGTAGCGGCTAATCAAGGCTT  
CACCTCGGATACCGTCACCAGGCGGCCGTTCTTGGCCTTCTTCGTACGCTGCATGGCAACGTGCGTGGT  
GTTTAACCGAATGCAGGTTTCTACCAGGTGCTCTTCTGCTTTCGCCATCGGCTCGCCGCGAGAAGTTG  
AGTACGTCCGCAACGTGTGGACGGAACACGCGGCCGGGCTTGTCTCCCTTCCCTTCCGGTATCGGTTCA  
TGGATTTCGGTTAGATGGGAAACCGCCATCAGTACCAGGTCGTAATCCCACACACTGGCCATGCCGGCCGG  
CCCTGCGGAAACCTCTACGTGCCCCTGGAAGCTCGTAGCGGATCACCTCGCCAGCTCGTCGGTCACGC  
TTCGACAGACGGAACCGCCACGTCCATGATGCTGCGACTATCGCGGGTGGCCACGTATAGAGCATCG  
GAACGAAAAAATCTGGTTGCTCGTCGCCCTTGGGCGGCTTCTAATCGACGGCGCACCGGTGCGGCGG  
TTGCCGGGATTCTTTGCGGATTCGATCAGCGGCCGCTTGCCACGATTACCGGGGCGTGCTTCTGCCTCG  
ATGCGTTGCCGCTGGGCGGCTGCGCGGCTTCAACTTCTCCACCAGGTCATACCCAGCGCCGCGCCGA  
TTTGTACCGGGCCGGATGGTTTGCACCGTCACGCCGATTCTCGGGCTTGGGGGTTCAGTGCCATTGC  
AGGGCCGGCAGACAACCCAGCCGCTTACGCCTGGCCAACCGCCGTTCTCCACACATGGGGCATTCAC  
GGCGTCGGTGCTGGTTGTCTTGATTTTCATGCCGCTCCTTTAGCCGCTAAAATTCATCTACTCATT  
TATTCATTTGCTCATTTACTCTGGTAGCTGCGCGATGTATTAGATAGCAGCTCGGTAATGGTCTTGCCT

TGGCGTACCGGTACATCTTCAGCTTGGTGTGATCCTCCGCCGGCAACTGAAAGTTGACCCGCTTCATGG  
CTGGCGTGTCTGCCAGGCTGGCCAACGTTGCAGCCTTGCTGCTGCGTGCGCTCGGACGGCCGGCACTTAG  
CGTGTTTGTGCTTTTGTCTATTTTCTTTTACCTCATTAAC TAAATGAGTTTTGATTTAATTTACAGCGG  
CCAGCGCTTGGACCTCGCGGGCAGCGTCGCCCTCGGGTTCTGATTCAAGAACGGTTGTGCCGGCGGGCGG  
AGTGCCTGGGTAGCTCACGCGCTGCGTGATACGGGACTCAAGAATGGGCAGCTCGTACCCGGCCAGCGCC  
TCGGCAACCTCACCGCCGATGCGCGTGCTTTGATCGCCCGGACACGACAAAAGGCCGCTTGTAGCCTTC  
CATCCGTGACCTCAATGCGCTGCTTAACCAGCTCCACCAGGTGGCGGTGGCCCATATGTCTGAAGGGCT  
TGGCTGCACCGGAATCAGCACGAAGTCGGCTGCCTTGATCGCGGACACAGCCAAGTCCGCCGCTGGGGC  
GCTCCGTGATCACTACGAAGTCGCGCCGGCCGATGGCCTTCACGTGCGGGTCAATCGTCGGGCGGTCTGA  
TGCCGACAACGGTTAGCGGTTGATCTTCCCGCACGGCCGCCAATCGCGGGCACTGCCCTGGGGATCGGA  
ATCGACTAACAGAACATCGGCCCCGGCGAGTTGCAGGGCGGGGCTAGATGGGTTGCGATGGTCTGCTTG  
CCTGACCCGCCTTTCTGGTTAAGTACAGCGATAACCTTCATGCGTTCCCTTGCGTATTTGTTTATTAC  
TCATCGCATCATATACGACGACCGCATGACGCAAGCTGTTTTACTCAAATACACATCACCTTTTTAGA  
CGGCGGCGCTCGGTTTTCTTCAGCGGCCAAGCTGGCCGGCCAGGCCGCCAGCTTGGCATCAGACAAACCGG  
CCAGGATTTTCATGCAGCCGCACGGTTGAGACGTGCGCGGGCGGCTCGAACACGTACCCGGCCGCGATCAT  
CTCCGCCTCGATCTCTTCGGTAATGAAAAACGGTTCGTCTGGCCGTCTTGGTGCGGTTTCATGCTTGTT  
CCTCTTGCGGTTTCATCTCGGCGGCCGCCAGGGCGTCGGCTCGGTCAATGCGTCTCACGGAAGGCACC  
GCGCCGCTGGCCTCGGTGGGCGTCACTTCCTCGCTGCGCTCAAGTGC GCGGTACAGGGTCGAGCGATGC  
ACGCCAAGCAGTGCAGCCGCCTCTTTCACGGTGCGGCCTTCCTGGTTCGATCAGCTCGCGGGCGTGCGGA  
TCTGTGCCGGGGTGAGGGTAGGGCGGGGCCAAACTTCACGCCTCGGGCCTTGCGCGCCTCGCGCCCGCT  
CCGGGTGCGGTTCGATGATTAGGGAACGCTCGAACTCGGCAATGCCGGCGAACACGGTCAACACCATGCGG  
CCGGCCGGCGTGGTGGTGTGCGGCCACGGCTCTGCCAGGCTACGCAGGCCCGCGCCGGCCTCCTGGATGC  
GCTCGGCAATGTCCAGTAGGTGCGGGTGCTGCGGGCCAGGCGGTCTAGCCTGGTCACTGTCAACACGTC  
GCCAGGGCGTAGGTGGTCAAGCATCCTGGCCAGCTCCGGGCGGTGCGCCCTGGTGCCGGTGATCTTCTCG  
GAAACAGCTTGGTGACGCCGGCCGCGTGACAGTTGCGCCCGTTGGTTGGTCAAGTCTGGTTCGTCGGTGC  
TGACGCGGGCATAGCCAGCAGGCCAGCGGCGGCGCTCTTGTTTCATGGCGTAATGTCTCCGGTTCTAGTC  
GCAAGTATTCTACTTTATGCGACTAAAACACGCGACAAGAAAACGCCAGGAAAAGGGCAGGGCGGCAGCC  
TGTCGCGTAACCTTAGGACTTGTGCGACATGTGTTTTTCAGAAGACGGCTGCACTGAACGTCAGAAGCCGA  
CTGCACTATAGCAGCGAGGGGTTGGATCAAAGTACTTTGATCCCGAGGGGAACCCTGTGGTTGGCATGC  
ACATACAAATGGACGAACGGATAAACCTTTTCACGCCCTTTTAAATATCCGTTATTCTAATAAACGCTCT  
TTTCTCTTAGGTTTACCCGCCAATATATCCTGTCAAACACTGATAGTTTAAACTGAAGGCGGGAAACGAC  
AATCTGATCCAAGCTCAAGCTAAGCTTGAGCTCTGCATGCCTGCAGGTCCCAGATTAGCCTTTTCAATT  
TCAGAAAGAATGCTAACCCACAGATGGTTAGAGAGGCTTACGCAGCAGGTCTCATCAAGACGATCTACCC  
GAGCAATAATCTCCAGGAAATCAAATACCTTCCCAAGAAGGTTAAAGATGCAGTCAAAAGATTGAGGACT  
AACTGCATCAAGAACACAGAGAAAGATATATTTCTCAAGATCAGAAGTACTATTCCAGTATGGACGATTC  
AAGGCTTGCTTCACAAACCAAGGCAAGTAATAGAGATTGGAGTCTCTAAAAAGGTAGTTCCTACTGAATC  
AAAGGCCATGGAGTCAAAGATTCAAATAGAGGACCTAACAGAACTCGCCGTAAAGACTGGCGAACAGTTC  
ATACAGAGTCTCTTACGACTCAATGACAAGAAGAAAATCTTCGTCAACATGGTGGAGCACGACACTTG  
TCTACTCCAAAAATATCAAAGATACAGTCTCAGAAGACCAAAGGGCAATTGAGACTTTTCAACAAAGGT  
AATATCCGGAAACCTCCTCGGATTCCATTGCCAGCTATCTGTCACTTTATTGTGAAGATAGTGGAAAAG  
GAAGGTGGCTCCTACAAATGCCATCATTGCGATAAAGGAAAGGCCATCGTTGAAGATGCCTCTGCCGACA  
GTGGTCCCAAAGATGGACCCCCACCCACGAGGAGCATCGTGAAAAAGAAGACGTTCCAACCACGTCTTC  
AAAGCAAGTGGATTGATGTGATATCTCCACTGACGTAAGGGATGACGCACAATCCCACTATCCTTCGCAA  
GACCTTCCTCTATATAAGGAAGTTCATTTCAATTTGGAGAGAACACGGGGGACTCTAGAGGATCCAAGGA

GATATAAGCCGCCACCATGGATTACAAGGACGATGATGACAAGGACTACAAGGACGATGACGATAAGGAC  
TATAAGGATGACGATGACAAGGATTACGCCGAGGATGGATGATACTAGCGGACAACTTTCGTTTCTGTG  
AACCTTTCTGACGAAAGCAACACGGCAAGCACTAAAGTTGAAAACGTAAAATCGGAAGCGGATCGCTTGG  
AGTTTTTACGTAAAATGAATCCCTTTATTGTTGACGCTCTGGTGCGGAAAACCAATTATCAGGGTGCTCG  
CTTTCGCGCAAGAATAATAGGAGTGTCGTGGATTGTGGTAGAAAACACGACAAGGCGCTCAAGACTGAA  
CGTAAGTGTAAAGTCAACAACACGCAATCTCAGAACGAGGTGGCGCATGCGGCGATGCACGATCCCGTTA  
AGTATTTGAACAAAAGAAAGGCTAGAGCCTTTTCTAACGCAGAGATGTTTGCGATTGAACTGGTTTCGTA  
CACCAAGGAAAGGCAATTGGCGGTGATTTAGCCGCTGAAAGGGAGAAGACGAGACTGGCTCGTAGACAC  
CCAATACGTTCTCCGGAAGAACTCCGGAACATTATAAATTCGGTATGACTGCTAAGGCAATGTTACCGG  
ACATCAACGCCGTAGACGTTGGTGATAACGAGGAACTTCGTGCGAGTACCCAGTGAGTCTGAGTGTTTT  
TGGCGGAGTTCTCCGTGAACACCACTTCATCTGACCTAATGATATCCCGCGGCCATGCTAGAGTCCGCAA  
AAATCACCAGTCTCTCTCTACAAATCTATCTCTCTATTTTTCTCCAGAATAATGTGTGAGTAGTTCCC  
AGATAAGGGAATTAGGGTTCTTATAGGGTTTCGCTCATGTGTTGAGCATATAAGAAACCCCTTAGTATGTA  
TTTGTATTTGTAAAATACTTCTATCAATAAAATTTCTAATTCCTAAAACCAAATCCAGTGACCTGCAGG  
CATGCGACGTCG

### Sequence of pH7LIC3.1.1-p23M7 (35S- p23M7)

GGGTACCCTCGAATTATCATACATGAGAATTAAGGGAGTCACGTTATGACCCCGCCGATGACGCGGGACA  
AGCCGTTTTACGTTTGAACTGACAGAACCGAACGTTGAAGGAGCCACTGAGCCGCGGGTTTCTGGAGT  
TTAATGAGCTAAGCACATACGTCAGAAACCATTATTGCGCGTTCAAAAGTCGCCTAAGGTCATATCAGC  
TAGCAAATATTTCTTGTCAAAAATGCTCCACTGACGTTCCATAAATTCCTTCGGTATCCAATTAGAGTC  
TCATATTCACTCTCAACTCGAATCCCCCTATGAAAAAGCCTGAACACACGCGACGTCTGTGAGAAGT  
TTCTGATCGAAAAGTTCGACAGCGTCTCCGACCTGATGCAGCTCTCGGAGGGCGAAGAATCTCGTGCTTT  
CAGCTTCGATGTAGGAGGGCGTGATATGTCTGCGGGTAAATAGCTGCGCCGATGGTTTCTACAAAGAT  
CGTTATGTTTATCGGCACTTTGCATCGGCCGCGCTCCCGATTCCGGAAGTGCTTGACATTGGGGAGTTCA  
GCGAGAGCCTGACCTATTGCATCTCCCGCCGTGCACAGGGTGTCACGTTGCAAGACCTGCCTGAAACCGA  
ACTGCCCGCTGTTCTTCAGCCGGTCGCGGAGGCTATGGATGCTATCGCTGCGGCCGATCTTAGCCAGACG  
AGCGGGTTCGGCCCATTCGGACCGCAAGGAATCGGTCAATACACTACATGGCGTGATTTATATGCGCGA  
TTGCTGATCCCCATGTGTATCACTGGCAAATGTGATGGACGACACCGTCAGTGCGTCCGTCGCGCAGGC  
TCTCGATGAGCTGATGCTTTGGGCGAGGACTGCCCGAAGTCCGGCACTCGTGACGCGGATTCGGCTCC  
AACAATGTCTGACGGACAATGGCCGCATAACAGCGGTCAATTGACTGGAGCGAGGCGATGTTGCGGGATT  
CCCAATACGAGGTGCCAACATCTTCTTCTGGAGGCCGTGGTTGGCTTGATGGAGCAGCAGACGCGCTA  
CTTCGAGCGGAGGCATCCGGAGCTTGCAAGATCGCCAAGGCTCCGGGCGTATATGCTCCGCATTGGTCTT  
GACCAACTCTATCAGAGCTTGTTGACGGCAATTTTCGATGATGCAGCTTGGGCGCAGGGTCGATGCGACG  
CAATCGTCCGATCCGGAGCCGGGACTGTCGGGCGTACACAAATCGCCCGCAGAAGCGCGGCCGTCTGGAC  
CGATGGCTGTGTAGAAGTACTCGCCGATAGTGAAACCAGCAGCCCCAGCACTCGTCCGAGGGCAAAGGAA  
TAGAGTAGATGCCGACCGAACAAGAGCTGATTTGAGAACGCCTCAGCCAGCAACTCGCGCGAGCCTAGC  
AAGGCAAAATGCGAGAGAACGGCCTTACGCTTGGTGGCACAGTTCTCGTCCACAGTTCGTAAGCTCGCTC  
GGCTGGGTGCGGGAGGGCCGGTCGAGTGATTACAGGAATTAATTCCTAGAGTCAAGCAGATCGTTCAA  
ACATTTGGCAATAAAGTTTCTTAAGATTGAATCCTGTTGCCGTCTTGCGATGATTATCATATAATTTCT  
GTTGAATTACGTTAAGCATGTAATAATTAACATGTAATGCATGACGTTATTTATGAGATGGGTTTTTATG  
ATTAGAGTCCCGCAATTATACATTTAATACGCGATAGAAAACAAAATATAGCGCGCAAACCTAGGATAAAT  
TATCGCGCGGGTGTATCTATGTTACTAGATCGACCGCATGCAAGCTGATAATCAATTCGGCGTTAA  
TTCAGTACATTAAAAACGTCCGCAATGTGTTATTAAGTTGTCTAAGCGTCAATTTGTTTACACCACAATA

TATCCTGCCACCAGCCAGCCAACAGCTCCCCGACCGGCAGCTCGGCACAAAATCACCCTCGATACAGGC  
AGCCCATCAGTCCGGGACGGCGTCAGCGGGAGAGCCGTTGTAAGGCGGCAGACTTTGCTCATGTTACCGA  
TGCTATTTCGGAAGAACGGCAACTAAGCTGCCGGGTTTGAACACGGATGATCTCGCGGAGGGTAGCATGT  
TGATTGTAACGATGACAGAGCGTTGCTGCCTGTGATCAATTCTGGGCACGAACCCAGTGGACATAAGCCTC  
GTTTCGGTTCGTAAGCTGTAATGCAAGTAGCGTAACTGCCGTCACGCAACTGGTCCAGAACCTTGACCGAA  
CGCAGCGGTGGTAACGGCGCAGTGGCGGTTTTTCATGGCTTCTTGTTATGACATGTTTTTTTGGGGTACAG  
TCTATGCCTCGGGCATCCAAGCAGCAAGCGCGTTACGCCGTGGGTCGATGTTTGATGTTATGGAGCAGCA  
ACGATGTTACGCAGCAGGGCAGTCGCCCTAAAACAAAGTTAAACATCATGGGGGAAGCGGTGATCGCCGA  
AGTATCGACTCAACTATCAGAGGTAGTTGGCGTCATCGAGCGCCATCTCGAACCGACGTTGCTGGCCGTA  
CATTTGTACGGCTCCGCACTGGATGGCGGCCTGAAGCCACACAGTGATATTGATTTGCTGGTTACGGTGA  
CCGTAAGGCTTGATGAAACAACGCGCGAGCTTTGATCAACGACCTTTTGAAACTTCGGCTTCCCCTGG  
AGAGAGCGAGATTCTCCGCGCTGTAGAAGTCACCATTGTTGTGCACGACGACATCATTCCGTGGCGTTAT  
CCAGCTAAGCGCGAACTGCAATTTGGAGAATGGCAGCGCAATGACATTCTTGAGGTATCTTCGAGCCAG  
CCACGATCGACATTGATCTGGCTATCTTGCTGACAAAAGCAAGAGAACATAGCGTTGCCTTGGTAGGTCC  
AGCGGCGGAGGAACCTCTTGATCCGTTCTCTGAACAGGATCTATTTGAGGCGCTAAATGAAACCTTAACG  
CTATGGAACCTCGCCGCCGACTGGGCTGGCGATGAGCGAAATGTAGTGCTTACGTTGTCCCGCATTTGGT  
ACAGCGCAGTAACCGGCAAAATCGCGCCGAAGGATGTCGCTGCCGACTGGGCAATGGAGCGCCTGCCGGC  
CCAGTATCAGCCCGTCATACTTGAAGCTAGACAGGCTTATCTTGACAAAGAAGAAGATCGCTTGCCCTCG  
CGCGCAGATCAGTTGGAAGAATTTGTCCACTACGTGAAAGGCGAGATCACCAAGGTAGTCGGCAAATAAT  
GTCTAGCTAGAAATTCGTTCAAGCCGACGCCGCTTCGCCGGCGTTAACTCAAGCGATTAGATGCACTAAG  
CACATAATTGCTCACAGCCAACTATCAGGTCAAGTCTGCTTTTATTATTTTAAAGCGTCATAATAAGC  
CCTACACAAATTGGGAGATATATCATGCATGACCAAAATCCCTTAACGTGAGTTTTCTGTTCCACTGAGCG  
TCAGACCCCGTAGAAAAGATCAAAGGATCTTCTTGAGATCCTTTTTTTCTGCGCGTAATCTGCTGCTTGC  
AAACAAAAAAACCACCGCTACCAGCGGTGGTTTGTGTTGCCGGATCAAGAGCTACCAACTCTTTTTCCGAA  
GGTAACTGGCTTCAGCAGAGCGCAGATACCAATACTGTCTTCTAGTGTAGCCGTAGTTAGGCCACCAC  
TTCAAGAACTCTGTAGCACCGCCTACATACCTCGCTCTGCTAATCCTGTTACCAGTGGCTGCTGCCAGTG  
GCGATAAGTCGTGCTTACCAGGTTGGACTCAAGACGATAGTTACCGGATAAGGCGCAGCGGTTCGGGCTG  
AACGGGGGGTTCTGTGCACACAGCCCAGCTTGAGCGAACGACCTACACCGAACTGAGATACCTACAGCGT  
GAGCTATGAGAAAGCGCCACGCTTCCCGAAGGGAGAAAGGCGGACAGGTATCCGTAAGCGGCAGGGTCG  
GAACAGGAGAGCGCACGAGGGAGCTTCCAGGGGGAACGCCTGGTATCTTTATAGTCCTGTCCGGGTTTCG  
CCACCTCTGACTTGAGCGTCGATTTTTGTGATGCTCGTCAGGGGGGCGGAGCCTATGGAAAAACGCCAGC  
AACGCGGCCTTTTTACGGTTCTTGGCCTTTTGCTGGCCTTTTGCTCACATGTTCTTTCTGCGTTATCCC  
CTGATTCTGTGGATAACCGTATTACCGCCTTTGAGTGAGCTGATACCGCTCGCCGCAGCCGAACGACCGA  
GCGCAGCGAGTCAGTGAGCGAGGAAGCGGAAGAGCGCCTGATGCGGTATTTCTCCTTACGCATCTGTGC  
GGTATTTTACACCGCATATGGTGCACTCTCAGTACAATCTGCTCTGATGCCGCATAGTTAAGCCAGTATA  
CACTCCGCTATCGCTACGTGACTGGGTCATGGCTGCGCCCCGACACCCGCCAACACCCGCTGACGCGCCC  
TGACGGGCTTGTCTGCTCCCGGCATCCGCTTACAGACAAGCTGTGACCGTCTCCGGGAGCTGCATGTGTC  
AGAGGTTTTACCGTCATACCGAAACGCGCGAGGCAGGGTGCTTGATGTGGGCGCCGGCGGTGAGTG  
GCGACGGCGCGGCTTGTCCGCGCCCTGGTAGATTGCCTGGCCGTAGGCCAGCCATTTTTGAGCGGCCAGC  
GGCCGCGATAGGCCGACGCGAAGCGCGGGGCGTAGGGAGCGCAGCGACCGAAGGGTAGGCGCTTTTTGC  
AGCTCTTCGGCTGTGCGCTGGCCAGACAGTTATGCACAGGCCAGGCGGGTTTTAAGAGTTTTAATAAGTT  
TTAAAGAGTTTTAGGCGGAAAAATCGCCTTTTTTCTCTTTTATATCAGTCACTTACATGTGTGACCGGTT  
CCCAATGTACGGCTTTGGGTTCCTAATGTACGGGTTCCGGTTCCCAATGTACGGCTTTGGGTTCCTAATG  
TACGTGCTATCCACAGGAAAGAGACCTTTTCGACCTTTTCCCCTGCTAGGGCAATTTGCCCTAGCATCT



GCTCCGTACATTAGGAACCGGCGGATGCTTCGCCCTCGATCAGGTTGCGGTAGCGCATGACTAGGATCGG  
GCCAGCCTGCCCCGCCTCCTCCTTCAAATCGTACTCCGGCAGGTCATTTGACCCGATCAGCTTGCGCACG  
GTGAAACAGAACTTCTTGAACCTCCTCCGGCGCTGCCACTGCGTTCTGTAGATCGTCTTGAACAACCATCTGG  
CTTCTGCCTTGCTGCGGCGCGGCGTGCCAGGCGGTAGAGAAAACGGCCGATGCCGGGATCGATCAAAAA  
GTAATCGGGGTGAACCGTCAGCACGTCCGGGTTCCTTGCCTTCTGTGATCTCGCGGTACATCCAATCAGCT  
AGCTCGATCTCGATGTACTCCGGCCGCCGGTTTCGCTCTTTACGATCTTGTAGCGGCTAATCAAGGCTT  
CACCTCGGATACCGTCACCAGGCGGCCGTTCCTTGGCCTTCTTCGTACGCTGCATGGCAACGTGCGTGGT  
GTTTAACCGAATGCAGGTTTCTACCAGGTCGTCTTTCTGCTTTCCGCCATCGGCTCGCCGGCAGAAGTTG  
AGTACGTCCGCAACGTGTGGACGGAACACGCGGCCGGGCTTGTCTCCCTTCCCTTCCCGGTATCGGTTCA  
TGGATTTCGGTTAGATGGGAAACGCCATCAGTACCAGGTCGTAATCCACACACTGGCCATGCCGGCCGG  
CCCTGCGGAAACCTCTACGTGCCCGTCTGGAAGCTCGTAGCGGATCACCTCGCCAGCTCGTCGGTCACGC  
TTCGACAGACGGAACCGCCACGTCCATGATGCTGCGACTATCGCGGGTGCCACGTCATAGAGCATCG  
GAACGAAAAAATCTGGTTGCTCGTCGCCCTTGGGCGGCTTCCTAATCGACGGCGCACCGGCTGCCGGCGG  
TTGCCGGGATTCTTTGCGGATTTCGATCAGCGGCCGTTCGCCACGATTCACCGGGGCGTGCTTCTGCCTCG  
ATGCGTTGCCGCTGGGCGGCCTGCGCGGCTTCAACTTCTCCACCAGGTCATCACCCAGCGCCGCGCCGA  
TTTGTACCGGGCCGGATGGTTTGCACCGCTCACGCCGATTTCCTCGGGCTTGGGGGTTCAGTGCCATTGC  
AGGGCCGCGCAGACAACCCAGCCGCTTACGCTTGCCAACCGCCGTTCTCCACACATGGGGCATTCCAC  
GGCGTCGGTGCTGGTTGTTCTTGATTTTCCATGCGGCTCCTTTAGCCGCTAAAATTCATCTACTCATT  
TATTCATTTGCTCATTACTCTGGTAGCTGCGCGATGTATTCAGATAGCAGCTCGGTAATGGTCTTGCCT  
TGGCGTACCGCGTACATCTTCAGCTTGGTGTGATCCTCCGCCGCAACTGAAAGTTGACCCGCTTCATGG  
CTGGCGTGTCTGCCAGGCTGGCCAACGTTGCAGCCTTGCTGCTGCGTGCGCTCGGACGGCCGGCACTTAG  
CGTGTTTGTGCTTTTGTCTATTTTCTTTACCTCATTAACCTCAAATGAGTTTGTATTTAATTTACGCGG  
CCAGCGCTTGGACCTCGCGGGCAGCGTCGCCCTCGGGTTCTGATTCAAGAACGGTTGTGCCGGCGGCGGC  
AGTGCCTGGGTAGCTCACGCGCTGCGTGATACGGGACTCAAGAATGGGCAGCTCGTACCCGGCCAGCGCC  
TCGGCAACCTCACCGCCGATGCGCGTGCCCTTGATCGCCCGCGACACGACAAAGCCGCTTGTAGCCTTC  
CATCCGTGACCTCAATGCGCTGCTTAACCAGCTCCACCAGGTCGGCGGTGGCCCATATGTCGTAAGGGCT  
TGGCTGCACCGGAATCAGCACGAAGTCGGCTGCCTTGATCGCGGACACAGCCAAGTCCGCCGCTTGGGGC  
GCTCCGTGATCACTACGAAGTCGCGCCGGCCGATGGCCTTCACGTGCGGGTCAATCGTCGGGCGGTGCA  
TGCCGACAACGGTTAGCGGTTGATCTTCCCGCACGGCCGCCAATCGCGGGCACTGCCCTGGGGATCGGA  
ATCGACTAACAGAACATCGGCCCCGGCGAGTTGCAGGGCGCGGGCTAGATGGGTTGCGATGGTTCGTCTTG  
CCTGACCCGCCTTTCTGGTTAAGTACAGCGATAACCTTCATGCGTTCCCTTGCGTATTTGTTTATTTAC  
TCATCGCATCATATACGCAGCGACCGCATGACGCAAGCTGTTTTACTCAAATACACATCACCTTTTTAGA  
CGGCGCGCTCGGTTTCTTCAGCGGCCAAGCTGGCCGGCCAGGCGCCAGCTTGGCATCAGACAAACCGG  
CCAGGATTTTCATGCAGCCGCACGGTTGAGACGTGCGCGGGCGGCTCGAACACGTACCCGGCCGCGATCAT  
CTCCGCTCGATCTCTTCGGTAATGAAAAACGGTTTCGTCTGGCCGCTCCTGGTGCGGTTTCATGCTTGTT  
CCTCTTGGCGTTTCATTCTCGGCGGCCGCCAGGGCGTCGGCTCGGTCAATGCGTCCTCACGGAAGGCACC  
GCGCCGCTGGCCTCGGTGGGCGTCACTTCCTCGCTGCGCTCAAGTGCGCGGTACAGGGTCGAGCGATGC  
ACGCCAAGCAGTGCAGCCGCTCTTTCACGGTGCGGCTTCCTGGTCGATCAGCTCGCGGGCGTGCGCGA  
TCTGTGCCGGGGTGAGGGTAGGGCGGGGGCCAACTTCACGCTCGGGCCTTGGCGGCCTCGCGCCCGCT  
CCGGGTGCGGTGATGATTAGGGAACGCTCGAACTCGGCAATGCCGGCGAACACGGTCAACACCATGCGG  
CCGGCCGGCGTGTTGGTGTGCGGCCACGGCTCTGCCAGGCTACGACGGCCGCGCCGGCCTCTGGATGC  
GCTCGGCAATGTCCAGTAGGTGCGGGTGCTGCGGGCCAGGCGGTCTAGCCTGGTCACTGTCAACACGTC  
GCCAGGGCGTAGGTGGTCAAGCATCTGGCCAGCTCCGGGCGGTGCGGCTGGTGCCGGTGATCTTCTCG  
GAAACAGCTTGGTGCAGCCGGCCGCGTGACGTTCCGGCCGTTGGTTGGTCAAGTCTGGTTCGTGCGTG

TGACGCGGGCATAGCCCAGCAGGCCAGCGCGGCGCTCTTGTTTCATGGCGTAATGTCTCCGGTTCTAGTC  
GCAAGTATTCTACTTTATGCGACTAAAACACGCGACAAGAAAACGCCAGGAAAAGGGCAGGGCGGCAGCC  
TGTCGCGTAACCTTAGGACTTGTGCGACATGTCGTTTTTCAGAAGACGGCTGCACTGAACGTCAGAAGCCGA  
CTGCACTATAGCAGCGGAGGGGTTGGATCAAAGTACTTTGATCCCCAGGGGAACCCTGTGGTTGGCATGC  
ACATACAAATGGACGAACGGATAAACCTTTTCACGCCCTTTTAAATATCCGTTATTCTAATAAACGCTCT  
TTTCTCTTAGGTTTACCCGCCAATATATCCTGTCAAACACTGATAGTTTAAACTGAAGCGGGAAACGAC  
AATCTGATCCAAGCTCAAGCTAAGCTTGAGCTCTGCATGCCTGCAGGTCCCCAGATTAGCCTTTTCAATT  
TCAGAAAGAATGCTAACCCACAGATGGTTAGAGAGGCTTACGCAGCAGGTCTCATCAAGACGATCTACCC  
GAGCAATAATCTCCAGGAAATCAAATACCTTCCCAAGAAGGTTAAAGATGCAGTCAAAAGATTCAGGACT  
AACTGCATCAAGAACACAGAGAAAGATATATTTCTCAAGATCAGAAGTACTATTCCAGTATGGACGATTC  
AAGGCTTGCTTCACAAACCAAGGCAAGTAATAGAGATTGGAGTCTCTAAAAAGGTAGTTCCCACTGAATC  
AAAGGCCATGGAGTCAAAGATTCAAATAGAGGACCTAACAGAACTCGCCGTAAAGACTGGCGAACAGTTC  
ATACAGAGTCTCTTACGACTCAATGACAAGAAGAAAATCTTCGTCAACATGGTGGAGCACGACACACTTG  
TCTACTCCAAAAATATCAAAGATACAGTCTCAGAAGACCAAAGGGCAATTGAGACTTTTCAACAAAGGTT  
AATATCCGGAAACCTCCTCGGATTCCATTGCCAGCTATCTGTCACTTTATTGTGAAGATAGTGGAAGG  
GAAGGTGGCTCCTACAAATGCCATCATTGCGATAAAGGAAAGGCCATCGTTGAAGATGCCTCTGCCGACA  
GTGGTCCCAAAGATGGACCCCCACCCACGAGGAGCATCGTGGAAAAAGAGACGTTCCAACCACGTCTTC  
AAAGCAAGTGATTGATGTGATATCTCCACTGACGTAAGGGATGACGCACAATCCCACTATCCTTCGCAA  
GACCCTTCCTCTATATAAGGAAGTTCATTTTCAATTTGGAGAGAACACGGGGGACTCTAGAGGATCCAAGGA  
GATATAAGCCGCCACCATTGGATTACAAGGACGATGATGACAAGGACTACAAGGACGATGACGATAAGGAC  
TATAAGGATGACGATGACAAGGATTACGCCGAGGATGGATGATACTAGCGGACAACTTTCGTTTCTGTG  
AACCCTTCTGACGAAAGCAACACGGCAAGCACTAAAGTTGAAAACGTAAAATCGGAAGCGGATCGCTTGG  
AGTTTTTACGTAAAATGAATCCCTTTATTGTTGACGCTCTGGTGCGGAAAAACCAATTATCAGGGTGCTCG  
CTTTCGCGCAAGAATAATAGGAGTGTGCGTGGATTGTGGTAGAAAACACGACAAGGCGCTCAAGACTGAA  
CGTAAGTGTAAGGTCAACAACACGCAATCTCAGAACGAGGTGGCGCATATGTTGATGCACGATGCGGTTA  
AGTATTTGAACAAAAGAAAGGCTAGAGCCTTTTCTAACGCAGAGATGTTTGCGATTGAACTGGTTTCGTA  
CACCAAGGAAAGGCAATTGGCGGTGATTTAGCCGCTGAAAGGGAGAAGACGAGACTGGCTCGTAGACAC  
CCAATACGTTCTCCGGAAGAACTCCGGAACATTATAAATTCGGTATGACTGCTAAGGCAATGTTACCGG  
ACATCAACGCCGTAGACGTTGGTGATAACGAGGAACTTCGTCCGAGTACCCAGTGAGTCTGAGTGTTTC  
TGGCGGAGTTCTCCGTGAACACCACTTCATCTGACCTAATGATATCCCGCGGCCATGCTAGAGTCCGCAA  
AAATCACCAGTCTCTCTCTACAAATCTATCTCTCTATTTTTCTCCAGAATAATGTGTGAGTAGTTCCT  
AGATAAGGGAATTAGGGTTCTTATAGGGTTTCGCTCATGTGTTGAGCATATAAGAAACCTTAGTATGTA  
TTTGTATTTGTAAAATACTTCTATCAATAAAATTTCTAATTCCTAAACCAAAATCCAGTGACCTGCAGG  
CATGCGACGTCG

### Sequence of pH7LIC3.1.1-p23M8 (35S- p23M8)

GGGTACCCTCGAATTATCATACATGAGAATTAAGGGAGTCACGTTATGACCCCGCCGATGACGCGGGACA  
AGCCGTTTTACGTTTGAACTGACAGAACCGCAACGTTGAAGGAGCCACTGAGCCGCGGGTTTCTGGAGT  
TTAATGAGCTAAGCACATACGTCAGAAACCATTTATGCGCGTTCAAAAGTCGCCTAAGGTCACTATCAGC  
TAGCAAATATTTCTTGTCAAAAATGCTCCACTGACGTTCCATAAATTCCCCTCGGTATCCAATTAGAGTC  
TCATATTTACTCTCAACTCGAATCCCCCTATGAAAAAGCCTGAACTCACCGCGACGTCTGTGAGAAGT  
TTCTGATCGAAAAGTTCGACAGCGTCTCCGACCTGATGCAGCTCTCGGAGGGCGAAGAATCTCGTGCTTT  
CAGCTTCGATGTAGGAGGGCGTGATATGTCTGCGGGTAAATAGCTGCGCCGATGGTTTCTACAAAGAT  
CGTTATGTTTATCGGCACCTTGCATCGGCCGCGCTCCCGATTCCGGAAGTGCTTGACATTGGGGAGTTCA

GCGAGAGCCTGACCTATTGCATCTCCCGCCGTGCACAGGGTGTACGTTGCAAGACCTGCCTGAAACCGA  
ACTGCCCCTGTTCTTCAGCCGGTCGCGGAGGCTATGGATGCTATCGCTGCGGCCGATCTTAGCCAGACG  
AGCGGGTTCGGCCCCATTTCGGACCGCAAGGAATCGGTCAATACACTACATGGCGTGATTTTCATATGCGCGA  
TTGCTGATCCCCATGTGTATCACTGGCAAACCTGTGATGGACGACACCGTCAGTGCGTCCGTCGCGCAGGC  
TCTCGATGAGCTGATGCTTTGGGCGAGGACTGCCCCGAAGTCCGGCACTCGTGACGCGGATTTCGGCTCC  
AACAAATGTCCTGACGGACAATGGCCGCATAACAGCGGTCAATTGACTGGAGCGAGGCGATGTTCCGGGGATT  
CCCAATACGAGGTGCGCAACATCTTCTTCTGAGGCGGTGGTTGGCTTGATGGAGCAGCAGACGCGCTA  
CTTCGAGCGGAGGCATCCGGAGCTTGCAGGATCGCCAAGGCTCCGGGCGTATATGCTCCGCATTGGTCTT  
GACCAACTCTATCAGAGCTTGGTTGACGGCAATTTTCGATGATGCAGCTTGGGCGCAGGGTCGATGCGACG  
CAATCGTCCGATCCGGAGCCGGGACTGTCCGGCGTACACAAATCGCCCGCAGAAGCGCGGCCGTCTGGAC  
CGATGGCTGTGTAGAAGTACTCGCCGATAGTGAAACCGACGCCCCAGCACTCGTCCGAGGGCAAAGGAA  
TAGAGTAGATGCCGACCGAACAAGAGCTGATTTTCGAGAACGCCTCAGCCAGCAACTCGCGCGAGCCTAGC  
AAGGCAAATGCGAGAGAACGGCCTTACGCTTGGTGGCACAGTTCTCGTCCACAGTTCGCTAAGCTCGCTC  
GGCTGGGTGCGGGGAGGGCCGGTCGCAGTGATTTCAGGAATTAATTCCTTAGAGTCAAGCAGATCGTTCAA  
ACATTTGGCAATAAAGTTTCTTAAGATTGAATCCTGTTGCCGGTCTTGCGATGATTATCATATAATTTCT  
GTTGAATTACGTTAAGCATGTAATAATTAACATGTAATGCATGACGTTATTTATGAGATGGGTTTTTATG  
ATTAGAGTCCCGCAATTATACATTTAATACGCGATAGAAAACAAAATATAGCGCGCAAACCTAGGATAAAT  
TATCGCGCGCGGTGTATCTATGTTACTAGATCGACCGCATGCAAGCTGATAATTCAATTCGGCGTTAA  
TTCAGTACATTAAAAACGTCCGCAATGTGTTATTAAGTTGTCTAAGCGTCAATTTGTTTACACCACAATA  
TATCCTGCCACCAGCCAGCCAACAGCTCCCCGACCGGCAGCTCGGCACAAAATCACCACCTCGATACAGGC  
AGCCCATCAGTCCGGGACGGCGTCAGCGGGAGAGCCGTTGTAAGGCGGCAGACTTTGCTCATGTTACCGA  
TGCTATTCCGAAGAACGGCAACTAAGCTGCCGGGTTTGAAACACGGATGATCTCGCGGAGGGTAGCATGT  
TGATTGTAACGATGACAGAGCGTTGCTGCCTGTGATCAATTCGGGCACGAACCCAGTGGACATAAGCCTC  
GTTCCGTTTCGTAAGCTGTAATGCAAGTAGCGTAACCTGCCGTACGCAACTGGTCCAGAACCCTTGACCGAA  
CGCAGCGGTGGTAACGGCGCAGTGGCGGTTTTTCATGGCTTCTTGTTATGACATGTTTTTTTTGGGGTACAG  
TCTATGCCTCGGGCATCCAAGCAGCAAGCGGTTACGCCGTGGGTTCGATGTTTGATGTTATGGAGCAGCA  
ACGATGTTACGCAGCAGGGCAGTCGCCCTAAAACAAAGTTAAACATCATGGGGGAAGCGGTGATCGCCGA  
AGTATCGACTCAACTATCAGAGGTAGTTGGCGTCATCGAGCGCCATCTCGAACCGACGTTGCTGGCCGTA  
CATTTGTACGGCTCCGCAGTGGATGGCGGCCTGAAGCCACACAGTGATATTGATTTGCTGGTTACGGTGA  
CCGTAAGGCTTGATGAAACAACGCGGCAGCTTTGATCAACGACCTTTTGAAACTTCGGCTTCCCTTG  
AGAGAGCGAGATTCTCCGCGCTGTAGAAGTCACCATTGTTGTGCACGACGACATCATCCGTGGCGTTAT  
CCAGCTAAGCGCGAACTGCAATTTGGAGAATGGCAGCGCAATGACATTCTTGACGGTATCTTCGAGCCAG  
CCACGATCGACATTGATCTGGCTATCTTGCTGACAAAAGCAAGAGAACATAGCGTTGCCTTGGTAGGTCC  
AGCGGCGGAGGAACCTTTGATCCGTTCTGAACAGGATCTATTTGAGGCGCTAAATGAAACCTTAACG  
CTATGGAACTCGCCGCCGACTGGGCTGGCGATGAGCGAAATGTAGTGCTTACGTTGTCCCGCATTTGGT  
ACAGCGCAGTAACCGGCAAAATCGCGCCGAAGGATGTCGCTGCCGACTGGGCAATGGAGCGCCTGCCGGC  
CCAGTATCAGCCGTCATACTTGAAGCTAGACAGGCTTATCTTGACAAAGAAGAAGATCGCTTGGCCTCG  
CGCGCAGATCAGTTGGAAGAATTTGTCCACTACGTGAAAGGCGAGATCACCAAGGTAGTCGGCAAATAAT  
GTCTAGCTAGAAATTCGTTCAAGCCGACGCCGCTTCGCCGGCGTTAACTCAAGCGATTAGATGCACTAAG  
CACATAATTGCTCACAGCCAACTATCAGGTCAAGTCTGCTTTTATTATTTTTAAGCGTGCATAATAAGC  
CCTACACAAATTTGGGAGATATATCATGCATGACCAAAATCCCTTAACGTGAGTTTTTCGTTCCACTGAGCG  
TCAGACCCCGTAGAAAAGATCAAAGGATCTTCTTGAGATCCTTTTTTTCTGCGCGTAATCTGCTGCTTGC  
AAACAAAAAACCACCGCTACCAGCGGTGGTTTGTGTTGCCGGATCAAGAGCTACCAACTCTTTTTCCGAA  
GGTAACTGGCTTCAGCAGAGCGCAGATACCAAATACTGTCTTCTAGTGTAGCCGTAGTTAGGCCACCAC

TTCAAGAACTCTGTAGCACCGCTACATACCTCGCTCTGCTAATCCTGTTACCAGTGGCTGCTGCCAGTG  
GCGATAAGTCGTGTCTTACCGGGTTGGACTCAAGACGATAGTTACCGGATAAGGCGCAGCGGTGCGGCTG  
AACGGGGGGTTTCGTGCACACAGCCCAGCTTGGAGCGAACGACCTACACCGAACTGAGATACCTACAGCGT  
GAGCTATGAGAAAGCGCCACGCTTCCCCAAGGGAGAAAGGCGGACAGGTATCCGGTAAGCGGCAGGGTCG  
GAACAGGAGAGCGCACGAGGGAGCTTCCAGGGGAAACGCCTGGTATCTTTATAGTCCTGTGCGGTTTCG  
CCACCTCTGACTTGAGCGTCGATTTTTGTGATGCTCGTCAGGGGGCGGAGCCTATGAAAAACGCCAGC  
AACGCGGCCTTTTTACGGTTTCTGGCCTTTTGCTGGCCTTTTGCTCACATGTTCTTTCTGCGTTATCCC  
CTGATTCTGTGGATAACCGTATTACCGCCTTTGAGTGAGCTGATACCGCTCGCCGCAGCCGAACGACCGA  
GCGCAGCGAGTCAGTGAGCGAGGAAGCGGAAGAGCGCCTGATGCGGTATTTTCTCCTTACGCATCTGTGC  
GGTATTTACACCCGCATATGGTGCACTCTCAGTACAATCTGCTCTGATGCCGCATAGTTAAGCCAGTATA  
CACTCCGCTATCGCTACGTGACTGGGTGATGGCTGCGCCCCGACACCCGCCAACACCCGCTGACGCGCCC  
TGACGGGCTTGTCTGCTCCCGGCATCCGCTTACAGACAAGCTGTGACCGTCTCCGGGAGCTGCATGTGTC  
AGAGGTTTTACCGTCATCACCGAAACGCGCAGGCAGGGTGCCCTTGATGTGGGCGCCGGCGGTGAGTG  
GCGACGGCGCGGCTTGTCGCGCCCTGGTAGATTGCCTGGCCGTAGGCCAGCCATTTTTGAGCGGCCAGC  
GGCCGCGATAGGCCGACGCGAAGCGCGGGGCGTAGGGAGCGCAGCGACCGAAGGGTAGGCGCTTTTTGTC  
AGCTCTTCGGCTGTGCGCTGGCCAGACAGTTATGCACAGGCCAGGCGGGTTTTAAGAGTTTTAATAAGTT  
TTAAGAGTTTTAGGCGGAAAAATCGCCTTTTTTCTCTTTTATATCAGTCACTTACATGTGTGACCGGTT  
CCCAATGTACGGCTTTGGGTTCCCAATGTACGGGTTCCGGTTCCCAATGTACGGCTTTGGGTTCCCAATG  
TACGTGCTATCCACAGGAAAGAGACCTTTTCGACCTTTTTCCCCTGCTAGGGCAATTTGCCCTAGCATCT  
GCTCCGTACATTAGGAACCGGCGGATGCTTCGCCCTCGATCAGGTTGCGGTAGCGCATGACTAGGATCGG  
GCCAGCCTGCCCCGCCCTCCTCCTTCAAATCGTACTCCGGCAGGTCAATTTGACCCGATCAGCTTGCGCACG  
GTGAAACAGAACTTCTTGAACCTCTCCGGCGCTGCCACTGCGTTCGTAGATCGTCTTGAACAACCATCTGG  
CTTCTGCCTTGCCCTGCGGCGCGGCGTGCCAGGCGGTAGAGAAAACGGCCGATGCCGGGATCGATCAAAAA  
GTAATCGGGGTGAACCGTCAGCACGTCCGGGTTCTTGCCCTTCTGTGATCTCGCGGTACATCCAATCAGCT  
AGCTCGATCTCGATGTACTCCGGCCGCCGGTTTTCGCTCTTTACGATCTTGTAGCGGCTAATCAAGGCTT  
CACCCCTCGGATACCGTCACCAGGCGGCCGTTCTTGCCCTTCTTCGTACGCTGCATGGCAACGTGCGTGGT  
GTTTAACCGAATGCAGGTTTCTACCAGTGCGTCTTTCTGCTTTCCGCCATCGGCTCGCCGGCAGAACTTG  
AGTACGTCCGCAACGTGTGGACGGAACACGCGGCCGGGCTTGCTCTCCCTTCCCTTCCCGGTATCGGTTCA  
TGGATTGCGTTAGATGGGAAACGCCATCAGTACCAGGTCGTAATCCACACACTGGCCATGCCGGCCGG  
CCCTGCGGAAACCTCTACGTGCCCCTGCGAAGCTCGTAGCGGATCACCTCGCCAGCTCGTCGGTCACGC  
TTTCGACAGACGGAACCGGCCACGTCCATGATGCTGCGACTATCGCGGGTGCCACGTCATAGAGCATCG  
GAACGAAAAAATCTGGTTGCTCGTCGCCCTTGGGCGGCTTCCTAATCGACGGCGCACCGGCTGCCGGCGG  
TTGCCGGGATTCTTTGCGGATTGATCAGCGGCCGCTTGCCACGATTCACCGGGCGTGCTTCTGCCTCG  
ATGCGTTGCCGCTGGGCGGCCCTGCGCGGCCCTTCAACTTCTCCACCAGGTCATCACCCAGCGCCGCGCCGA  
TTTGTACCGGGCCGGATGGTTTGCGACCGTCACGCCGATTTCCTCGGGCTTGGGGGTTCCAGTGCCATTGC  
AGGGCCGGCAGACAACCCAGCCGCTTACGCCTGGCCAACCGCCGTTCTCCACACATGGGGCATTCCAC  
GGCGTCGGTGCCCTGGTTGTCTTGATTTTCCATGCCGCTCCTTTAGCCGCTAAAATTCATCTACTCATT  
TATTCAATTGCTCATTTACTCTGGTAGCTGCGCGATGTATTAGATAGCAGCTCGGTAATGGTCTTGCCCT  
TGGCGTACCGCGTACATCTCAGCTTGGTGTGATCCTCCGCCGGCAACTGAAAGTTGACCCGCTTCATGG  
CTGGCGTGTCTGCCAGGCTGGCCAACGTTGCAGCCTTGCTGCTGCGTGCCTCGGACGGCCGGCACTTAG  
CGTGTTTTGTGCTTTTGCTCATTTTCTCTTTACCTCATTAACCAAATGAGTTTTGATTTAATTTACGCGG  
CCAGCGCCTGGACCTCGCGGGCAGCGTCGCCCTCGGGTTCTGATTCAAGAACGGTTGTGCCGGCGGCGGC  
AGTGCTTGGGTAGCTCACGCGCTGCGTGATACGGGACTCAAGAATGGGCAGCTCGTACCCGGCCAGCGCC  
TCGGCAACCTCACCGCCGATGCGCGTGCCCTTGATCGCCCGCGACACGACAAAGCCGCTTGTAGCCTTC

CATCCGTGACCTCAATGCGCTGCTTAACCAGCTCCACCAGGTCGGCGGTGGCCCATATGTCGTAAGGGCT  
TGGCTGCACCGGAATCAGCACGAAGTCGGCTGCCTTGATCGCGGACACAGCCAAGTCCGCCGCCTGGGGC  
GCTCCGTCGATCACTACGAAGTCGCGCCGGCCGATGGCCTTCACGTCGCGGTCAATCGTCGGGCGGTGGA  
TGCCGACAACGGTTAGCGGTGATCTTCCCGCACGGCCGCCAATCGCGGGCACTGCCCTGGGGATCGGA  
ATCGACTAACAGAACATCGGCCCCGGCGAGTTGCAGGGCGCGGGCTAGATGGGTTGCGATGGTCGTCTTG  
CCTGACCCGCCTTTCTGGTTAAGTACAGCGATAACCTTCATGCGTTCCCTTGCGTATTTGTTTATTAC  
TCATCGCATCATATACGCAGCGACCGCATGACGCAAGCTGTTTTACTCAAATACACATCACCTTTTTAGA  
CGGCGGCGCTCGGTTTTCTTACGCGCCAAGCTGGCCGGCCAGGCCGCCAGCTTGGCATCAGACAAACGG  
CCAGGATTTTCATGCAGCCGCACGGTTGAGACGTGCGCGGGCGGCTCGAACACGTACCCGGCCGCGATCAT  
CTCCGCCTCGATCTCTTCGGTAATGAAAAACGGTTTCGTCTGGCCGTCTGGTGCGGTTTCATGCTTGTT  
CCTCTTGGCGTTTCTTCTGGCGGCCCGCAGGGCGTCGGCTCGGTCAATGCGTCCTCACGGAAGGCACC  
GCGCCGCTGGCCTCGGTGGGCGTCACTTCCTCGCTGCGCTCAAGTGC GCGGTACAGGGTCGAGCGATGC  
ACGCCAAGCAGTGCAGCCGCCTCTTTCACGGTGCGGCCCTTCCTGGTCGATCAGCTCGCGGGCGTGCGGA  
TCTGTGCCGGGTGAGGGTAGGGCGGGGCCAAACTTCACGCCTCGGGCCTTGGCGGCCTCGCGCCCGCT  
CCGGGTGCGGTGATGATTAGGGAACGCTCGAACTCGGCAATGCCGGCGAACACGGTCAACACCATGCGG  
CCGGCCGGCGTGGTGGTGTCGGCCCACGGCTCTGCCAGGCTACGCAGGCCCCGCGCGGCCCTCTGGATGC  
GCTCGGCAATGTCCAGTAGGTGCGGGTGCTGCGGGCCAGGCGGTCTAGCCTGGTCACTGTCAACAGTC  
GCCAGGGCGTAGGTGGTCAAGCATCCTGGCCAGCTCCGGGCGGTGCGCCTGGTGCCGGTGATCTTCTCG  
GAAACAGCTTGGTGACCCGGCCGCGTGACGTTCCGGCCGTTGGTTGGTCAAGTCTGGTCGTGCGTG  
TGACGCGGGCATAGCCCAGCAGGCCAGCGCGCGCTCTTGTTTCATGGCGTAATGTCTCCGGTTCTAGTC  
GCAAGTATTCTACTTTATGCGACTAAAACACGCGACAAGAAAACGCCAGGAAAAGGGCAGGGCGGCAGCC  
TGTCGCGTAACCTTAGGACTTGTGCGACATGTGTTTTTCAGAAGACGGCTGCACTGAACGTGAGAAGCCGA  
CTGCACTATAGCAGCGGAGGGGTGGATCAAAGTACTTTGATCCCGAGGGGAACCTGTGGTTGGCATGC  
ACATACAAATGGACGAACGGATAAACCTTTTCACGCCCTTTTAAATATCCGTTATTCTAATAAACGCTCT  
TTTCTCTTAGGTTTACCCGCCAATATATCCTGTCAAACACTGATAGTTTAAACTGAAGCGGGAAACGAC  
AATCTGATCCAAGCTCAAGCTAAGCTTGAGCTCTGCATGCCTGCAGGTCCCCAGATTAGCCTTTTCAATT  
TCAGAAAGAAATGCTAACCCACAGATGGTTAGAGAGGCTTACGCAGCAGGTCTCATCAAGACGATCTACCC  
GAGCAATAATCTCCAGGAAATCAAATACCTTCCCAAGAAGGTTAAAGATGCAGTCAAAAGATTGAGGACT  
AACTGCATCAAGAACACAGAGAAAGATATATTTCTCAAGATCAGAAGTACTATTCCAGTATGGACGATTC  
AAGGCTTGCTTCACAAACCAAGGCAAGTAATAGAGATTGGAGTCTCTAAAAAGGTAGTTCCCACTGAATC  
AAAGGCCATGGAGTCAAAGATTCAAATAGAGGACCTAACAGAACTCGCCGTAAAGACTGGCGAACAGTTC  
ATACAGAGTCTCTTACGACTCAATGACAAGAAGAAAATCTTCGTCAACATGGTGGAGCACGACACACTTG  
TCTACTCCAAAAATATCAAAGATACAGTCTCAGAAGACCAAGGGCAATTGAGACTTTTCAACAAAGGT  
AATATCCGAAACCTCCTCGGATTCCATTGCCCAGCTATCTGTCACTTTATTGTGAAGATAGTGGAAAAG  
GAAGGTGGCTCCTACAAATGCCATCATTGCGATAAAGGAAAGGCCATCGTTGAAGATGCCTCTGCCGACA  
GTGGTCCCAAAGATGGACCCCCACCCACGAGGAGCATCGTGAAAAAGAAGACGTTCCAACCACGTCTTC  
AAAGCAAGTGGAATTGATGTGATATCTCCACTGACGTAAGGGATGACGCACAATCCCACTATCCTTCGCAA  
GACCTTCTCTATATAAGGAAGTTCATTTTCAATTTGGAGAGAACACGGGGGACTCTAGAGGATCCAAGGA  
GATATAAGCCGCCACCATGGATTACAAGGACGATGATGACAAGGACTACAAGGACGATGACGATAAGGAC  
TATAAGGATGACGATGACAAGGATTACGCCGAGGATGGATGATACTAGCGGACAAACTTTCGTTTCTGTG  
AACCTTTCTGACGAAAGCAACACGGCAAGCACTAAAGTTGAAAACGTAAAATCGGAAGCGGATCGCTTGG  
AGTTTTTACGTAAAATGAATCCCTTTATTTGTTGACGCTCTGGTGCGGAAAACCAATTATCAGGGTGCTCG  
CTTTCGCGCAAGAATAATAGGAGTGTGCGTGGATTGTGGTAGAAAACACGACAAGGCGCTCAAGACTGAA  
CGTAAGTGTAAGGTCAACAACACGCAATCTCAGAACGAGGTGGCGCATATGTTGATGCACGATCCCGTTA

AGGCGGCGAACAAAAGAAAGGCTAGAGCCTTTTCTAACGCAGAGATGTTTGCGATTGAACTGGTTTCGTA  
CACCAAGGAAAGGCAATTGGCGGTTCGATTTAGCCGCTGAAAGGGAGAAGACGAGACTGGCTCGTAGACAC  
CCAATACGTTTCTCCGGAAGAACTCCGGAACATTATAAATTCGGTATGACTGCTAAGGCAATGTTACCGG  
ACATCAACGCCGTAGACGTTGGTGATAACGAGGAACTTCGTGCGAGTACCCAGTGAGTCTGAGTGTTTC  
TGGCGGAGTTCTCCGTGAACACCACTTCATCTGACCTAATGATATCCCGCGGCCATGCTAGAGTCCGCAA  
AAATCACCAGTCTCTCTCTACAAATCTATCTCTCTATTTTTCTCCAGAATAATGTGTGAGTAGTTCCTCC  
AGATAAGGGAATTAGGGTTCTTATAGGGTTTCGCTCATGTGTTGAGCATATAAGAAACCCTTAGTATGTA  
TTTGTATTTGTAAAATACTTCTATCAATAAAATTTCTAATTCCTAAAACCAAATCCAGTGACCTGCAGG  
CATGCGACGTCG

### Sequence of pH7LIC3.1.1-p23M9 (35S- p23M9)

GGGTACCCTCGAATTATCATACATGAGAATTAAGGGAGTCACGTTATGACCCCGCCGATGACGCGGGACA  
AGCCGTTTTACGTTTGAACTGACAGAACCGCAACGTTGAAGGAGCCACTGAGCCGCGGGTTTCTGGAGT  
TTAATGAGCTAAGCACATACGTCAGAAACCATTATTGCGCGTTCAAAAGTCGCCTAAGGTCACTATCAGC  
TAGCAAATATTTCTTGTCAAAAATGCTCCACTGACGTTCCATAAATTCCCCTCGGTATCCAATTAGAGTC  
TCATATTTACTCTCAACTCGAATCCCCCTATGAAAAAGCCTGAACTCACCGCGACGTCTGTGAGAAGT  
TTCTGATCGAAAAGTTCGACAGCGTCTCCGACCTGATGCAGCTCTCGGAGGGCGAAGAATCTCGTGCTTT  
CAGCTTCGATGTAGGAGGGCGTGATATGTCTGCGGGTAAATAGCTGCGCCGATGGTTTCTACAAAGAT  
CGTTATGTTTATCGGCACTTTGCATCGGCCGCGCTCCCGATTCCGGAAGTGCTTGACATTGGGGAGTTCA  
GCGAGAGCCTGACCTATTGCATCTCCCGCCGTGCACAGGGTGTACGTTGCAAGACCTGCCTGAAACCGA  
ACTGCCGCTGTTCTTCAGCCGGTCGCGGAGGCTATGGATGCTATCGCTGCGGCCGATCTTAGCCAGACG  
AGCGGGTTCGGCCCATTCGGACCGCAAGGAATCGGTCAATACACTACATGGCGTGATTTCATATGCGCGA  
TTGCTGATCCCATGTGTATCACTGGCAAATGTGATGGACGACACCGTCAGTGCGTCCGTCGCGCAGGC  
TCTCGATGAGCTGATGCTTTGGGCGAGGACTGCCCCGAAGTCCGGCACTCGTGACGCGGATTCGGCTCC  
AACAATGTCCTGACGGACAATGGCCGCATAACAGCGTCAATTGACTGGAGCGAGGCGATGTTGCGGGATT  
CCCAATACGAGGTCGCCAACATCTTCTTCTGGAGGCCGTGGTTGGCTTGATGGAGCAGCAGACGCGCTA  
CTTCGAGCGGAGGCATCCGGAGCTTGCAGGATCGCCAAGCTCCGGGCGTATATGCTCCGCATTGGTCTT  
GACCAACTCTATCAGAGCTTGGTTGACGGCAATTTGATGATGCAGCTTGGGCGCAGGGTCGATGCGACG  
CAATCGTCCGATCCGGAGCCGGGACTGTGCGGCGTACACAAATCGCCCGCAGAAGCGCGGCCGTCTGGAC  
CGATGGCTGTGTAGAAGTACTCGCCGATAGTGAAACCGACGCCCCAGCACTCGTCCGAGGGCAAAGGAA  
TAGAGTAGATGCCGACCGAACAAGAGCTGATTTGAGAACGCCTCAGCCAGCAACTCGCGCGAGCCTAGC  
AAGGCAAATGCGAGAGAACGGCCTTACGCTTGGTGGCACAGTTCTCGTCCACAGTTCGCTAAGCTCGCTC  
GGCTGGGTGCGGGGAGGCGCGGTGCGAGTGATTACAGGAATTAATTCCTAGAGTCAAGCAGATCGTTCAA  
ACATTTGGCAATAAAGTTTCTTAAGATTGAATCCTGTTGCCGGTCTTGCATGATTATCATATAATTTCT  
GTTGAATTACGTTAAGCATGTAATAATTAACATGTAATGCATGACGTTATTTATGAGATGGGTTTTTATG  
ATTAGAGTCCCGCAATTATACATTTAATACGCGATAGAAAACAAAATATAGCGCGCAAACTAGGATAAAT  
TATCGCGCGCGGTGTCATCTATGTTACTAGATCGACCGCATGCAAGCTGATAATTCATTCGGCGTTAA  
TTCAGTACATTAAAAACGTCCGCAATGTGTTATTAAGTTGTCTAAGCGTCAATTTGTTTACACCACAATA  
TATCCTGCCACCAGCCAGCCAACAGCTCCCCGACCGGCAGCTCGGCACAAAATCACCCTCGATACAGGC  
AGCCCATCAGTCCGGGACGGCGTCAGCGGGAGAGCCGTTGTAAGGCGGCAGACTTTGCTCATGTTACCGA  
TGCTATTTCGAAGAACGGCAACTAAGCTGCCGGGTTTGAACACGGATGATCTCGCGGAGGGTAGCATGT  
TGATTGTAACGATGACAGAGCGTTGCTGCCTGTGATCAATTCGGGCACGAACCCAGTGACATAAGCCTC  
GTTCCGTTTCGTAAGCTGTAATGCAAGTAGCGTAACTGCCGTACGCAACTGGTCCAGAACCTTGACCGAA  
CGCAGCGGTGGTAACGGCGCAGTGCGGTTTTTCATGGCTCTTGTTATGACATGTTTTTTTTGGGGTACAG

TCTATGCCTCGGGCATCCAAGCAGCAAGCGCGTTACGCCGTGGGTCGATGTTTGATGTTATGGAGCAGCA  
ACGATGTTACGCAGCAGGGCAGTCGCCCTAAAACAAAGTTAAACATCATGGGGGAAGCGGTGATCGCCGA  
AGTATCGACTCAACTATCAGAGGTAGTTGGCGTCATCGAGCGCCATCTCGAACCGACGTTGCTGGCCGTA  
CATTTGTACGGCTCCGCAGTGGATGGCGGCCTGAAGCCACACAGTGATATTGATTTGCTGGTTACGGTGA  
CCGTAAGGCTTGATGAAACAACGCGCGAGCTTTGATCAACGACCTTTTGAAACTTCGGCTTCCCCTGG  
AGAGAGCGAGATTCTCCGCGCTGTAGAAGTCACCATTGTTGTGCACGACGACATCATTCGTTGGCGTTAT  
CCAGCTAAGCGCGAACTGCAATTTGGAGAATGGCAGCGCAATGACATTCTTGAGGTATCTTCGAGCCAG  
CCACGATCGACATTGATCTGGCTATCTTGCTGACAAAAGCAAGAGAACATAGCGTTGCCTTGGTAGGTCC  
AGCGGCGGAGGAACCTTTTGATCCGGTTCCTGAACAGGATCTATTTGAGGCGCTAAATGAAACCTTAACG  
CTATGGAACCTCGCCGCCGACTGGGCTGGCGATGAGCGAAATGTAGTGCTTACGTTGTCCCGCATTTGGT  
ACAGCGCAGTAACCGGCAAAATCGCGCCGAAGGATGTCGCTGCCGACTGGGCAATGGAGCGCCTGCCGGC  
CCAGTATCAGCCCGTCATACTTGAAGCTAGACAGGCTTATCTTGACAGAAGAAGATCGCTTGGCCTCG  
CGCGCAGATCAGTTGGAAGAATTTGTCCACTACGTGAAAGGCGAGATCACCAAGGTAGTCGGCAAATAAT  
GTCTAGCTAGAAATTCGTTCAAGCCGACGCCGCTTCGCCGGCGTTAACTCAAGCGATTAGATGCACTAAG  
CACATAATTGCTCACAGCCAAACTATCAGGTCAAGTCTGCTTTTATTATTTTAAAGCGTGCATAATAAGC  
CCTACACAAATTGGGAGATATATCATGCATGACCAAAATCCCTTAACGTGAGTTTTCGTTCCACTGAGCG  
TCAGACCCCGTAGAAAAGATCAAAGGATCTTCTTGAGATCCTTTTTTTCTGCGCGTAATCTGCTGCTTGC  
AAACAAAAAAACCACCGCTACCAGCGGTGGTTTGTGTTGCCGGATCAAGAGCTACCAACTCTTTTTCCGAA  
GGTAACTGGCTTCAGCAGAGCGCAGATACCAAATACTGTCCTTCTAGTGTAGCCGTAGTTAGGCCACCAC  
TTCAAGAACTCTGTAGCACCGCCTACATACCTCGCTCTGCTAATCCTGTTACCAGTGGCTGCTGCCAGTG  
GCGATAAGTCGTGTCTTACCGGGTGGACTCAAGACGATAGTTACCGGATAAGGCGCAGCGGTGCGGCTG  
AACGGGGGGTTCGTGCACACAGCCCAGCTTGGAGCGAACGACCTACACCGAACTGAGATACCTACAGCGT  
GAGCTATGAGAAAGCGCCACGCTTCCCGAAGGGGAGAAAGGCGGACAGGTATCCGGTAAGCGGCAGGGTCG  
GAACAGGAGAGCGCACGAGGGAGCTTCCAGGGGGAACGCCTGGTATCTTTATAGTCCTGTGCGGTTTTCG  
CCACCTCTGACTTGAGCGTCGATTTTTGTGATGCTCGTCAGGGGGCGGAGCCTATGGA AAAACGCCAGC  
AACGCGGCCTTTTTACGGTTCCTGGCCTTTTGCTGGCCTTTTGCTCACATGTTCTTTCTGCGTTATCCC  
CTGATTCTGTGGATAACCGTATTACCGCCTTTGAGTGAGCTGATACCGCTCGCCGCAGCCGAACGACCGA  
GCGCAGCGAGTCAGTGAGCGAGGAAGCGGAAGAGCGCCTGATGCGGTATTTCTCCTTACGCATCTGTGC  
GGTATTTACACCGCATATGGTGCACTCTCAGTACAATCTGCTCTGATGCCGCATAGTTAAGCCAGTATA  
CACTCCGCTATCGCTACGTGACTGGGTGCTGCGCCCCGACACCCGCCAACACCCGCTGACGCGCCC  
TGACGGGCTTGTCTGCTCCCGCATCCGCTTACAGACAAGCTGTGACCGTCTCCGGGAGCTGCATGTGTC  
AGAGGTTTTACCGTCATCACCGAAACGCGCAGGCAGGGTGCCTTGATGTGGGCGCCGGCGGTGAGTG  
GCGACGGCGCGGCTTGTCGCGCCCTGGTAGATTGCCGTCGCGGTAGGCCAGCCATTTTTGAGCGGCCAGC  
GGCCGCGATAGGCCGACGCGAAGCGCGGGGCGTAGGGAGCGCAGCGACCGAAGGGTAGGCGCTTTTTGC  
AGCTCTTCGGCTGTGCGCTGGCCAGACAGTTATGCACAGGCCAGGCGGGTTTTAAGAGTTTTAATAAGTT  
TTAAAGAGTTTTAGGCGGAAAAATCGCCTTTTTTCTCTTTTATATCAGTCACTTACATGTGTGACCGGTT  
CCCAATGTACGGCTTTGGGTTCCCAATGTACGGGTTCGGTTCCCAATGTACGGCTTTGGGTTCCCAATG  
TACGTGCTATCCACAGGAAAGAGACCTTTTCGACCTTTTCCCCTGCTAGGGCAATTTGCCCTAGCATCT  
GCTCCGTACATTAGGAACCGGCGGATGCTTCGCCCTCGATCAGGTTGCGGTAGCGCATGACTAGGATCGG  
GCCAGCCTGCCCCGCTCCTCCTTCAAATCGTACTCCGGCAGGTCAATTTGACCCGATCAGCTTGCGCACG  
GTGAAACAGAACTTCTTGAACCTCCTCGGCGCTGCCACTGCGTTCTGTAGATCGTCTTGAACAACCATCTGG  
CTTCTGCCTTGCCTGCGGCGCGGCGTGCCAGGCGGTAGAGAAAACGGCCGATGCCGGGATCGATCAAAAA  
GTAATCGGGGTGAACCGTCAGCACGTCCGGGTCTTGCCCTTCTGTGATCTCGCGGTACATCCAATCAGCT  
AGCTCGATCTCGATGTACTCCGGCCGCCGGTTTCGCTCTTTACGATCTTGTAGCGGCTAATCAAGGCTT

CACCCTCGGATACCGTCACCAGGCGGCCGTTCTTGGCCTTCTTCGTACGCTGCATGGCAACGTGCGTGGT  
GTTTAACCGAATGCAGGTTTCTACCAGGTCGTCTTTCTGCTTTCCGCCATCGGCTCGCCGGCAGAACTTG  
AGTACGTCCGCAACGTGTGGACGGAACACGCGGCCGGGCTTGTCTCCCTTCCCTTCCCGGTATCGGTTCA  
TGGATTTCGGTTAGATGGGAAACCGCCATCAGTACCAGGTCGTAATCCCACACACTGGCCATGCCGGCCGG  
CCCTGCGGAAACCTCTACGTGCCCCTCTGGAAGCTCGTAGCGGATCACCTCGCCAGCTCGTCGGTCACGC  
TTCGACAGACGGAACCGCCACGTCCATGATGCTGCGACTATCGCGGGTGCCACGTATAGAGCATCG  
GAACGAAAAAATCTGGTTGCTCGTCGCCCTTGGGCGGCTTCCTAATCGACGGCGCACCGGCTGCCGGCGG  
TTGCCGGGATTCTTTGCGGATTTCGATCAGCGGCCGCTTGCCACGATTACCGGGGCGTGCTTCTGCCTCG  
ATGCGTTGCCGCTGGGCGGCCTGCGCGGCTTCAACTTCTCCACCAGGTCATCACCCAGCGCCGCGCCGA  
TTTGTACCGGGCCGGATGGTTTGCGACCGTCACGCCGATTTCCTCGGGCTTGGGGGTTCCAGTGCCATTGC  
AGGGCCGGCAGACAACCCAGCGCTTACGCCTGGCAACCGCCCGTTCCCTCCACACATGGGGCATTCCAC  
GGCGTCGGTGCCCTGGTTGTTCTTGATTTTCCATGCCGCTCCTTTAGCCGCTAAAATTCATCTACTCATT  
TATTCATTTGCTCATTTACTCTGGTAGCTGCGCGATGTATTTCAGATAGCAGCTCGGTAATGGTCTTGCCCT  
TGGCGTACCGGTACATCTTCAGCTTGGTGTGATCCTCCGCCGGCAACTGAAAGTTGACCCGCTTCATGG  
CTGGCGTGTCTGCCAGGCTGGCCAACGTTGCAGCCTTGCTGCTGCGTGCCTCGGACGGCCGGCACTTAG  
CGTGTTTGCTGCTTTTGCTCATTCTTCTTTACCTCATTAACCAAATGAGTTTTGATTTAATTTACAGCG  
CCAGCGCTTGACCTCGCGGGCAGCGTCGCCCTCGGGTTCTGATTCAAGAACGGTTGTGCCGGCGGCGGC  
AGTGCTTGGGTAGCTCAGCGCTGCGTGATACGGGACTCAAGAATGGGCAGCTCGTACCCGGCCAGCGCC  
TCGGCAACCTCACCGCCGATGCGCGTGCCCTTGATCGCCCGCGACACGACAAAGGCCGCTTGTAGCCTTC  
CATCCGTGACCTCAATGCGCTGCTTAACCAGCTCCACCAGGTCGGCGGTGGCCCATATGTCGTAAGGGCT  
TGGCTGCACCGGAATCAGCACGAAGTCGGCTGCCTTGATCGCGGACACAGCCAAGTCCGCCGCTGGGGC  
GCTCCGTGATCACTACGAAGTCGCGCCGCGCGATGGCCTTCACGTGCGGGTCAATCGTCGGGCGGTGCA  
TGCCGACAACGGTTAGCGGTTGATCTTCCCGCACGGCCGCCAATCGCGGGCACTGCCCTGGGGATCGGA  
ATCGACTAACAGAACATCGGCCCCGGCGAGTTGCAGGGCGCGGGCTAGATGGGTTGCGATGGTCTGTTG  
CCTGACCCGCTTTCTGGTTAAGTACAGCGATAACCTTCATGCGTTCCCTTGCGTATTTGTTTATTAC  
TCATCGCATCATATACGCGACCGCATGACGCAAGCTGTTTTACTCAAATACACATCACCTTTTTAGA  
CGGCGGCGCTCGGTTTCTTCAGCGGCCAAGCTGGCCGGCCAGGCCGCCAGCTTGGCATCAGACAAACCG  
CCAGGATTTTCATGCAGCCGACGTTGAGACGTGCGCGGGCGGCTCGAACACGTACCCGGCCGCGATCAT  
CTCCGCCTCGATCTCTTCGGTAATGAAAAACGGTTTCGTCTTGCCGTCCTGGTGCGGTTTCATGCTTGTT  
CCTCTTGCGGTTTCATCTCGGCGGCCGCGAGGGCGTCGGCTCGGTCAATGCGTCCTCACGGAAGGCACC  
GCGCCGCTGGCCTCGGTGGGCGTCACTTCCTCGCTGCGCTCAAGTGCGCGGTACAGGGTCGAGCGATGC  
ACGCCAAGCAGTGCAGCCGCTCTTTACGGTGCGGCCTTCCTGGTCGATCAGCTCGCGGGCGTGCGGA  
TCTGTGCCGGGTGAGGGTAGGGCGGGGCCAACTTCACGCCTCGGGCCTTGGCGGCCCTCGCGCCCGCT  
CCGGGTGCGGTGATGATTAGGGAACGCTCGAACTCGGCAATGCCGGCGAACACGGTCAACACCATGCGG  
CCGGCCGGCGTGGTGGTGTCGGGCCACGGCTCTGCCAGGCTACGCAGGCCCGCGCCGGCCTCCTGGATGC  
GCTCGGCAATGTCCAGTAGGTGCGGGTGCTGCGGGCCAGGCGGTCTAGCCTGGTCACTGTCACAACGTC  
GCCAGGGCGTAGGTGGTCAAGCATCCTGGCCAGCTCCGGGCGGTGCGCCTGGTGCCGGTGATCTTCTCG  
GAAAACAGCTTGGTGCAGCCGGCGCGTGACGTTTCGGCCGTTGGTTGGTCAAGTCCTGGTCGTGCGTGC  
TGACGCGGGCATAGCCAGCAGGCCAGCGCGGCGCTCTGTTTCATGGCGTAATGTCTCCGGTTCTAGTC  
GCAAGTATTCTACTTTATGCGACTAAAACACGCGACAAGAAAACGCCAGGAAAAGGGCAGGGCGGCAGCC  
TGTCGCGTAACCTTAGGACTTGTGCGACATGTGTTTTTCAGAAGACGGCTGCACTGAACGTGAGAAGCCGA  
CTGCACTATAGCAGCGAGGGGTTGGATCAAAGTACTTTGATCCCAGGGGAACCTGTGGTTGGCATGC  
ACATACAAATGGACGAACGGATAAACCTTTTCACGCCCTTTTAAATATCCGTTATTCTAATAAACGCTCT  
TTTCTCTTAGGTTTACCCGCCAATATATCCTGTCAAACACTGATAGTTTAAACTGAAGGCGGGAAACGAC



AATCTGATCCAAGCTCAAGCTAAGCTTGAGCTCTGCATGCCTGCAGGTCCCCAGATTAGCCTTTTCAATT  
TCAGAAAAGATGCTAACCACAGATGGTTAGAGAGGCTTACGCAGCAGGTCTCATCAAGACGATCTACCC  
GAGCAATAATCTCCAGGAAATCAAATACCTTCCCAAGAAGGTTAAAGATGCAGTCAAAAGATTGAGGACT  
AACTGCATCAAGAACACAGAGAAAGATATATTTCTCAAGATCAGAAGTACTATTCCAGTATGGACGATTC  
AAGGCTTGCTTCACAAACCAAGGCAAGTAATAGAGATTGGAGTCTCTAAAAAGGTAGTTCCCACTGAATC  
AAAGGCCATGGAGTCAAAGATTCAAATAGAGGACCTAACAGAACTCGCCGTAAAGACTGGCGAACAGTTT  
ATACAGAGTCTCTTACGACTCAATGACAAGAAGAAAATCTTCGTCAACATGGTGGAGCACGACACACTTG  
TCTACTCCAAAAATATCAAAGATACAGTCTCAGAAGACCAAAGGGCAATTGAGACTTTTCAACAAAGGGT  
AATATCCGGAAACCTCCTCGGATTCCATTGCCCAGCTATCTGTCACTTTATTGTGAAGATAGTGGAAAAG  
GAAGGTGGCTCCTACAAATGCCATCATTGCGATAAAGGAAAGGCCATCGTTGAAGATGCCTCTGCCGACA  
GTGGTCCCAAAGATGGACCCCCACCCACGAGGAGCATCGTGAAAAAGAAGACGTTCCAACCACGTCTTC  
AAAGCAAGTGGATTGATGTGATATCTCCACTGACGTAAGGGATGACGCACAATCCCACTATCCTTCGCAA  
GACCTTCTCTATATAAGGAAGTTCATTTTCAATTTGGAGAGAACACGGGGGACTCTAGAGGATCCAAGGA  
GATATAAGCCGCCACCATGGATTACAAGGACGATGATGACAAGGACTACAAGGACGATGACGATAAGGAC  
TATAAGGATGACGATGACAAGGATTACGCCGAGGATGGATGATACTAGCGGACAACTTTCGTTTCTGTG  
AACCTTTCTGACGAAAGCAACACGGCAAGCACTAAAGTTGAAAACGTAAAAATCGGAAGCGGATCGCTTGG  
AGTTTTTACGTAAAATGAATCCCTTTATTGTTGACGCTCTGGTGCGGAAAACCAATTATCAGGGTGCTCG  
CTTTCGCGCAAGAATAATAGGAGTGTGCGTGGATTGTGGTAGAAAACACGACAAGGCGCTCAAGACTGAA  
CGTAAGTGTAAGGTCAACAACACGCAATCTCAGAACGAGGTGGCGCATATGTTGATGCACGATCCCGTTA  
AGTATTTGAACAAAAGAAAGGCTGCGGCCTTTTCTAACGCAGAGATGTTTGCGATTGAAGTGGTTTCGTA  
CACCAAGGAAAGGCAATTGGCGGTGATTTAGCCGCTGAAAGGGAGAAGACGAGACTGGCTCGTAGACAC  
CCAATACGTTCTCCGGAAGAACTCCGGAACATTATAAATTCGGTATGACTGCTAAGGCAATGTTACCGG  
ACATCAACGCCGTAGACGTTGGTGATAACGAGGAACTTCGTGCGAGTACCCAGTGAGTCTGAGTGTTTC  
TGGCGGAGTTCTCCGTGAACACCACTTCATCTGACCTAATGATATCCCGCGGCCATGCTAGAGTCCGCAA  
AAATCACCACTCTCTCTCTACAAATCTATCTCTCTATTTTTCTCCAGAATAATGTGTGAGTAGTTCCC  
AGATAAGGGAATTAGGGTTCTTATAGGGTTTCGCTCATGTGTTGAGCATATAAGAAACCCTTAGTATGTA  
TTTGTATTTGTAAAATACTTCTATCAATAAAATTTCTAATTCCTAAAACCAAATCCAGTGACCTGCAGG  
CATGCGACGTCG

### **Sequence of pH7LIC3.1.1-p23M10 (35S- p23M10)**

GGGTACCCCTCGAATTATCATACATGAGAATTAAGGGAGTCACGTTATGACCCCGCCGATGACGCGGGACA  
AGCCGTTTTACGTTTGGAAGTACAGAACCGCAACGTTGAAGGAGCCACTGAGCCGCGGTTTTCTGGAGT  
TTAATGAGCTAAGCACATACGTCAGAAACCATTATTGCGCGTTCAAAAGTCGCCTAAGGTCATATCAGC  
TAGCAAATATTTCTTGTCAAAAATGCTCCACTGACGTTCATAAATTCCTCGGTATCCAATTAGAGTC  
TCATATTTCACTCTCAACTCGAATCCCCCTATGAAAAAGCCTGAACTCACCGCGACGTCTGTCGAGAAGT  
TTCTGATCGAAAAGTTCGACAGCGTCTCCGACCTGATGCAGCTCTCGGAGGGCGAAGAATCTCGTGCTTT  
CAGCTTCGATGTAGGAGGGCGTGATATGTCTGCGGTTAAATAGCTGCGCCGATGGTTTCTACAAAGAT  
CGTTATGTTTATCGGCACTTTGCATCGGCCGCGCTCCCGATTCCGGAAGTGCTTGACATTGGGGAGTTCA  
GCGAGAGCCTGACCTATTGCATCTCCCGCCGTGCACAGGGTGTCAGTTGCAAGACCTGCCTGAAACCGA  
ACTGCCCGCTGTTCTTCAGCCGGTCGCGGAGGCTATGGATGCTATCGCTGCGGCCGATCTTAGCCAGACG  
AGCGGGTTCGGCCCATTCGGACCGCAAGGAATCGGTCAATACACTACATGGCGTGATTTATATGCGCGA  
TTGCTGATCCCCATGTGTATCACTGGCAAATGTGATGGACGACACCGTCAGTGCGTCCGTGCGCGAGGC  
TCTCGATGAGCTGATGCTTTGGGCGAGGACTGCCCGAAGTCCGGCACTCGTGACGCGGATTCGGCTCC  
ACAATGTCTGACGGACAATGGCCGCATAACAGCGTCATTGACTGGAGCGAGGCGATGTTTCGGGGATT

CCCAATACGAGGTCGCCAACATCTTCTTCTGGAGGCCGTGGTTGGCTTGTATGGAGCAGCAGACGCGCTA  
CTTCGAGCGGAGGCATCCGGAGCTTGCAGGATCGCCAAGGCTCCGGGCGTATATGCTCCGCATTGGTCTT  
GACCAACTCTATCAGAGCTTGGTTGACGGCAATTTTCGATGATGCAGCTTGGGCGCAGGGTCGATGCGACG  
CAATCGTCCGATCCGGAGCCGGGACTGTGCGGCGTACACAAATCGCCCGCAGAAGCGCGGCCGTCTGGAC  
CGATGGCTGTGTAGAAGTACTCGCCGATAGTGAAACCGACGCCCCAGCACTCGTCCGAGGGCAAAGGAA  
TAGAGTAGATGCCGACCGAACAAGAGCTGATTTTCGAGAACGCCTCAGCCAGCAACTCGCGCGAGCCTAGC  
AAGGCAAATGCGAGAGAACGGCCTTACGCTTGGTGCCACAGTTCTCGTCCACAGTTCGCTAAGCTCGCTC  
GGCTGGGTGCGGGAGGGCCGGTTCGAGTGATTACAGGAATTAATTCCTTAGAGTCAAGCAGATCGTTCAA  
ACATTTGGCAATAAAGTTTCTTAAGATTGAATCCTGTTGCCGGTCTTGCATGATTATCATATAATTTCT  
GTTGAATTACGTTAAGCATGTAATAATTAACATGTAATGCATGACGTTATTTATGAGATGGGTTTTTATG  
ATTAGAGTCCCGCAATTATACATTTAATACGCGATAGAAAACAAAATATAGCGCGCAAACCTAGGATAAAT  
TATCGCGCGGGTGTCTATCTATGTTACTAGATCGACCGCATGCAAGCTGATAATTCAATTCGGCGTTAA  
TTCAGTACATTAAAAACGTCCGCAATGTGTTATTAAGTTGTCTAAGCGTCAATTTGTTTACACCACAATA  
TATCCTGCCACCAGCCAGCCAACAGCTCCCCGACCGGCAGCTCGGCACAAAATCACCCTCGATACAGGC  
AGCCCATCAGTCCGGGACGGCGTCAGCGGGAGAGCCGTTGTAAGGCGGCAGACTTTGCTCATGTTACCGA  
TGCTATTCCGAAGAACGGCAACTAAGCTGCCGGGTTTGAAACACGGATGATCTCGCGGAGGGTAGCATGT  
TGATTGTAACGATGACAGAGCGTTGCTGCCTGTGATCAATTCGGGCACGAACCCAGTGGACATAAGCCTC  
GTTCCGTTTCGTAAGCTGTAATGCAAGTAGCGTAAGTGCCTGACGCAACTGGTCCAGAACCTTGACCGAA  
CGCAGCGGTGGTAACGGCGCAGTGGCGGTTTTTCATGGCTTCTTGTTATGACATGTTTTTTTTGGGGTACAG  
TCTATGCCTCGGGCATCCAAGCAGCAAGCGCGTTACGCCGTGGGTTCGATGTTTGATGTTATGGAGCAGCA  
ACGATGTTACGCAGCAGGGCAGTCGCCCTAAAACAAAGTTAAACATCATGGGGGAAGCGGTGATCGCCGA  
AGTATCGACTCAACTATCAGAGGTAGTTGGCGTCATCGAGCGCCATCTCGAACCGACGTTGCTGGCCGTA  
CATTTGTACGGCTCCGCACTGGATGGCGGCCTGAAGCCACACAGTGATATTGATTTGCTGGTTACGGTGA  
CCGTAAGGCTTGATGAAACAACGCGCGAGCTTTGATCAACGACCTTTTGAAACTTCGGCTTCCCCTGG  
AGAGAGCGAGATTCTCCGCGCTGTAGAAGTCACCATTGTTGTGCACGACGACATCATTCCTGGCGTTAT  
CCAGCTAAGCGCGAACTGCAATTTGGAGAATGGCAGCGCAATGACATTCTTGACAGGTATCTTCGAGCCAG  
CCACGATCGACATTGATCTGGCTATCTTGCTGACAAAAGCAAGAGAACATAGCGTTGCCTTGGTAGGTCC  
AGCGGCGGAGGAACCTTTTGATCCGTTCTTGAACAGGATCTATTTGAGGCGCTAAATGAAACCTTAACG  
CTATGGAACCTCGCCGCCCGACTGGGCTGGCGATGAGCGAAATGTAGTGCTTACGTTGTCCCGCATTTGGT  
ACAGCGCAGTAACCGGCAAAATCGCGCCGAAGGATGTCGCTGCCGACTGGGCAATGGAGCGCCTGCCGGC  
CCAGTATCAGCCCGTCATACTTGAAGCTAGACAGGCTTATCTTGACAGAAGAAGATCGCTTGGCCTCG  
CGCGCAGATCAGTTGGAAGAATTTGTCCACTACGTGAAAGCGGAGATACCAAGGTAGTCGGCAAATAAT  
GTCTAGCTAGAAATTCGTTCAAGCCGACGCCGCTTCGCCGGCGTTAACTCAAGCGATTAGATGCACTAAG  
CACATAATTGCTCACAGCCAACTATCAGGTCAAGTCTGCTTTTATTATTTTAAAGCGTGACATAATAAGC  
CCTACACAAATTGGGAGATATATCATGCATGACCAAAATCCCTTAACGTGAGTTTTTCGTTCCACTGAGCG  
TCAGACCCCGTAGAAAAGATCAAAGGATCTTCTTGAGATCCTTTTTTTCTGCGCGTAATCTGCTGCTTGC  
AAACAAAAAAACCACCGCTACCAGCGGTGGTTTGTGTTGCCGGATCAAGAGCTACCAACTCTTTTTCCGAA  
GGTAAC TGCTT CAGCAGAGCGCAGATACCAAATACTGTCTTCTAGTGTAGCCGTAGTTAGGCCACCAC  
TTCAAGAACTCTGTAGCACCGCTACATACCTCGCTCTGCTAATCCTGTTACCAGTGGCTGCTGCCAGTG  
GCGATAAGTCGTGTCTTACCGGGTTGGACTCAAGACGATAGTTACCGGATAAGGCGCAGCGGTCCGGGCTG  
AACGGGGGGTTCTGTGCACACAGCCCAGCTTGAGCGCAACGACCTACACCGAACTGAGATACCTACAGCGT  
GAGCTATGAGAAAGCGCCACGCTTCCCGAAGGGAGAAAGCGGACAGGTATCCGGTAAGCGGCAGGGTCG  
GAACAGGAGAGCGCACGAGGGAGCTTCCAGGGGAAACGCCTGGTATCTTTATAGTCCTGTCCGGGTTTCG  
CCACCTCTGACTTGAGCGTCGATTTTTTGATGCTCGTCAGGGGGCGGAGCCTATGAAAAACGCCAGC

AACGCGGCCTTTTTACGGTTCCTGGCCTTTTGCTGGCCTTTTGCTCACATGTTCTTTCCGCTTATCCC  
CTGATTCTGTGGATAACCGTATTACCGCCTTTGAGTGAGCTGATACCGCTCGCCGCAGCCGAACGACCGA  
GCGCAGCGAGTCAGTGAGCGAGGAAGCGGAAGAGCGCCTGATGCGGTATTTTCTCCTTACGCATCTGTGC  
GGTATTTTACACCGCATATGGTGCACCTCTCAGTACAATCTGCTCTGATGCCGCATAGTTAAGCCAGTATA  
CACTCCGCTATCGCTACGTGACTGGGTCTGCTGCGCCCCGACACCCGCCAACACCCGCTGACGCGCCC  
TGACGGGCTTGTCTGCTCCCGGCATCCGCTTACAGACAAGCTGTGACCGTCTCCGGGAGCTGCATGTGTC  
AGAGGTTTTACCGTTCATACCGAAACGCGCGAGGCAGGGTGCCTTGATGTGGGCGCCGGCGGTGAGTG  
GCGACGGCGCGGCTTGTCCGCGCCCTGGTAGATTGCCTGGCCGTAGGCCAGCCATTTTTGAGCGGCCAGC  
GGCCGCGATAGGCCGACGCGAAGCGCGGGGCGTAGGGAGCGCAGCGACCGAAGGGTAGGCGCTTTTTGC  
AGCTCTTCGGCTGTGCGCTGGCCAGACAGTTATGCACAGGCCAGGCGGGTTTTAAGAGTTTTAATAAGTT  
TTAAAGAGTTTTAGGCGGAAAAATCGCCTTTTTTCTCTTTTATATCAGTCACTTACATGTGTGACCGGTT  
CCCAATGTACGGCTTTGGGTTCCCAATGTACGGGTTCCGCTTCCCAATGTACGGCTTTGGGTTCCCAATG  
TACGTGCTATCCACAGGAAAGAGACCTTTTCGACCTTTTCCCCTGCTAGGGCAATTTGCCTTAGCATCT  
GCTCCGTACATTAGGAACCGGCGGATGCTTCGCCCTCGATCAGGTTGCGGTAGCGCATGACTAGGATCGG  
GCCAGCCTGCCCCGCTCCTCCTTCAAATCGTACTCCGGCAGGTCATTTGACCCGATCAGCTTGCGCACG  
GTGAAACAGAACTTCTTGAACCTCTCCGGCGCTGCCACTGCGTTTCGTAGATCGTCTTGAACAACCATCTGG  
CTTCTGCCTTGCTGCGGCGCGGCGTGCCAGGCGGTAGAGAAAACGGCCGATGCCGGGATCGATCAAAAA  
GTAATCGGGGTGAACCGTCAGCACGTCCGGGTCTTGCTTCTGTGATCTCGCGGTACATCCAATCAGCT  
AGCTCGATCTCGATGTACTCCGGCCGCCCGGTTTCGCTCTTTACGATCTTGTAGCGGCTAATCAAGGCTT  
CACCTTCGGATACCGTCACCAGGCGGCCGTTCTTGCGCTTCTTCGTACGCTGCATGGCAACGTGCGTGGT  
GTTTAACCGAATGCAGGTTTCTACCAGGTGCTCTTTCTGCTTTCGCCCATCGGCTCGCCGGCAGAACTTG  
AGTACGTCCGCAACGTGTGGACGGAACACGCGGCCGGGCTTGTCTCCCTTCCCTTCCCGGTATCGGTTCA  
TGGATTTCGGTTAGATGGGAAACCGCCATCAGTACCAGGTCGTAATCCCACACACTGGCCATGCCGGCCGG  
CCCTGCGGAAACCTCTACGTGCCCCGTCTGGAAGCTCGTAGCGGATCACCTCGCCAGCTCGTCGGTTCACGC  
TTCGACAGACGGAACCGCCACGTCCATGATGCTGCGACTATCGCGGTGCCACGTATAGAGCATCG  
GAACGAAAAAATCTGGTTGCTCGTCGCCCTTGGGCGGCTTCCTAATCGACGGCGCACCGGCTGCCGGCGG  
TTGCCGGGATTCTTTGCGGATTTCGATCAGCGGCCGCTTGCCACGATTACCGGGGCGTGCTTCTGCCTCG  
ATGCGTTGCCGCTGGGCGGCTGCGCGGCTTCAACTTCTCCACCAGGTCATCACCCAGCGCCGCGCCGA  
TTTGTACCGGGCCGGATGGTTTTCGACCGTACGCGCGATTCTCGGGCTTGGGGGTTCCAGTGCCATTGC  
AGGGCCGGCAGACAACCCAGCCGCTTACGCCTGGCCAACCGCCGTTCTCCACACATGGGGCATTCCAC  
GGCGTCGGTGCTGGTTGTCTTGATTTTCCATGCCGCTCCTTTAGCCGCTAAAATTCATCTACTCATT  
TATTCATTTGCTCATTTACTCTGGTAGCTGCGCGATGTATTCAGATAGCAGCTCGGTAATGGTCTTGCCCT  
TGGCGTACCGCGTACATCTTCAGCTTGGTGTGATCCTCCGCCGGCAACTGAAAGTTGACCCGCTTCATGG  
CTGGCGTGTCTGCCAGGCTGGCCAACGTTGCAGCCTTGCTGCTGCGTGCCTCGGACGGCCGGCAGCTTAG  
CGTGTGTGTGCTTTTGCTCATTTTCTCTTTACCTCATTAACCTCAAATGAGTTTTGATTTAATTTTACGCGG  
CCAGCGCTGGACCTCGCGGGCAGCGTCGCCCTCGGGTTCTGATTCAAGAACGGTTGTGCCGGCGGCGGC  
AGTGCTTGGGTAGCTCACGCGCTGCGTGATACGGGACTCAAGAATGGGCAGCTCGTACCCGGCCAGCGCC  
TCGGCAACCTCACCGCCGATGCGCGTGCTTTGATCGCCCGGACACGACAAAGGCCGCTTGATAGCCTTC  
CATCCGTGACCTCAATGCGCTGCTTAACCAGCTCCACCAGGTGCGCGGTGGCCCATATGTCGTAAGGGCT  
TGGCTGCACCGGAATCAGCACGAAGTCGGCTGCCTTGATCGCGGACACAGCCAAGTCCGCCGCTGGGGC  
GCTCCGTGATCACTACGAAGTCGCGCCGGCCGATGGCCTTCACGTGCGGGTCAATCGTCGGGCGGTGCA  
TGCCGACAACGGTTAGCGGTTGATCTTCCCGCACGGCCGCCAATCGCGGGCACTGCCCTGGGGATCGGA  
ATCGACTAACAGAACATCGGCCCCGGCGAGTTGCAGGGCGGGGCTAGATGGGTGCGATGGTTCGTCTTG  
CCTGACCCGCCTTTCTGGTTAAGTACAGCGATAACCTTCATGCGTTCCCTTGCGTATTTGTTTATTAC

TCATCGCATCATATACGCAGCGACCGCATGACGCAAGCTGTTTTACTCAAATACACATCACCTTTTTAGACGGCGGCGCTCGGTTTCTTCAGCGGCCAAGCTGGCCGGCCAGGCCGCCAGCTTGGCATCAGACAAACCGGCCAGGATTTTCATGCAGCCGCACGGTTGAGACGTGCGCGGGCGGCTCGAACACGTACCCGGCCGCGATCATCTCCGCCTCGATCTCTTCGGTAATGAAAAACGGTTCGTCTCGCCGTCTGGTGCGGTTTCATGCTTGTTCTCTTTGGCGTTCATTCTCGGCGGCCGCCAGGGCGTCGGCTCGGTCAATGCGTCCTCACGGAAGGCACC GCGCCGCTGGCCTCGGTGGGCGTCACTTCCTCGCTGCGCTCAAGTGC GCGGTACAGGGTCGAGCGATGCACGCCAAGCAGTGCAGCCGCTCTTTACGGTGCGGCCTTCCTGGTCGATCAGCTCGCGGGCGTGCGCGATCTGTGTCCGGGTGAGGGTAGGGCGGGGCCAAACTTCACGCCTCGGGCCTTGGCGGCCTCGCGCCCCGTCCGGGTGCGGTGATGATTAGGGAACGCTCGAACTCGGCAATGCCGGCGAACACGGTCAACACCATGCGGCCGGCCGCGTGGTGTTGTCGGCCCACGGCTCTGCCAGGCTACGCAGGCCCGCGCCGGCCTCTCGATGCTCGGCAATGTCCAGTAGGTGCGGGTGCTGCGGGCCAGGCGGTCTAGCCTGGTCACTGTCAACAGTCGCCAGGGCGTAGGTGGTCAAGCATCCTGGCCAGCTCCGGGCGGTGCGGCCTGGTGCCGGTGATCTTCTCGAAAACAGCTTGGTGACGCCGGCCGCGTGACAGTTTCGGCCCGTTGGTTGGTCAAGTCTGGTCGTGCGGTGCTGACGCGGGCATAGCCAGCAGGCCAGCGCGGCGCTCTGTTCATGGCGTAATGTCTCCGGTTCTAGTGCAGTATTCTACTTTATGCGACTAAAAACGCGACAAAGAAAACGCCAGGAAAAGGGCAGGGCGGCAGCC TGTCGCGTAACCTTAGGACTTGTGCGACATGTGCTTTTCAGAAGACGGCTGCACTGAACGTCAAGACCGCATGCACTATAGCAGCGGAGGGGTGGATCAAAGTACTTTGATCCCGAGGGGAACCCTGTGGTTGGCATGCACATACAAATGGACGAACGGATAAACCTTTTCACGCCCTTTTAAATATCCGTTATTCTAATAAACGCTCTTTTCTCTTAGGTTTACCCGCCAATATATCCTGTCAAACACTGATAGTTTAACTGAAGGCGGGAAACGACAATCTGATCCAAGCTCAAGCTAAGCTTGAGCTCTGCATGCCTGCAGGTCCCCAGATTAGCCTTTTCAATTTCAGAAAGAATGCTAACCACAGATGGTTAGAGAGGCTTACGCAGCAGGTCTCATCAAGACGATCTACCCGAGCAATAATCTCCAGGAAATCAAATACCTTCCCAAGAAGGTTAAAGATGCAGTCAAAAGATTCAGGACTAACTGCATCAAGAACACAGAGAAAGATATATTTCTCAAGATCAGAAGTACTATTCCAGTATGGACGATTC AAGGCTTGCTTCACAAACCAAGGCAAGTAATAGAGATTGGAGTCTCTAAAAAGGTAGTTCCCACTGAATCAAAGGCCATGGAGTCAAAGATTCAAATAGAGGACCTAACAGAACTCGCCGTAAAGACTGGCGAACAGTTCATACAGAGTCTCTTACGACTCAATGACAAGAAGAAAATCTTCGTCAACATGGTGAGCACGACACACTTG TCTACTCCAAAAATATCAAAGATACAGTCTCAGAAGACCAAAGGGCAATTGAGACTTTTCAACAAAGGTAATATCCGGAAACCTCTCGGATTCCATTGCCCAGCTATCTGTCACTTTATTGTGAAGATAGTGGAAGGAAGGTGGCTCCTACAAATGCCATCATTGCGATAAAGGAAAGGCCATCGTTGAAGATGCCTCTGCCGACAGTGGTCCCAAAGATGGACCCCCACCCACGAGGAGCATCGTGGAAGAAAGACGTTCCAACCACGTCTTCAAAGCAAGTGATTGATGTGATATCTCCACTGACGTAAGGGATGACGCACAATCCCACTATCCTTCGCAAGACCTTCCTCTATATAAGGAAGTTCATTTTCATTTGGAGAGAACACGGGGGACTCTAGAGGATCCAAGGAGATATAAGCCGCCACCATGGATTACAAGGACGATGATGACAAGGACTACAAGGACGATGACGATAAGGAC TATAAGGATGACGATGACAAGGATTACGCCGAGGATGGATGATACTAGCGGACAAACTTTCGTTTCTGTGAACCTTTCTGACGAAAGCAACACGGCAAGCACTAAAGTTGAAAACGTAAAATCGGAAGCGGATCGCTTGGAGTTTTTACGTAAAATGAATCCCTTTATTGTTGACGCTCTGGTGCGGAAAACCAATTATCAGGGTGCTCGCTTTTCGCGCAAGAATAATAGGAGTGTCGTGGATTGTGGTAGAAAACACGACAAGGCGCTCAAGACTGAACGTAAGTGAAGGTCAACAACACGCAATCTCAGAACGAGGTGGCGCATATGTTGATGCACGATCCCGTTAAGTATTTGAACAAAAGAAAGGCTAGAGCCGCGTCTAACGCAGAGATGTTTGCGATTGAACTGGTTTCGTACACCAAGGAAAGGCAATTGGCGGTGATTTAGCCGCTGAAAGGGAGAAGACGAGACTGGCTCGTAGACACCCAATACGTTCTCCGGAAGAACTCCGGAACATTATAAATTCGGTATGACTGCTAAGGCAATGTTACCGGACATCAACGCCGTAGACGTTGGTGATAACGAGGAACTTCGTGCGAGTACCCAGTGAGTCTGAGTGTTCTGGCGGAGTTCTCCGTGAACACCACTTCATCTGACCTAATGATATCCCGCGGCCATGCTAGAGTCCGCAA AATCACCAGTCTCTCTCTACAAATCTATCTCTCTATTTTTCTCCAGAATAATGTGTGAGTAGTTC

AGATAAGGGAATTAGGGTTCTTATAGGGTTTCGCTCATGTGTTGAGCATATAAGAAACCCCTAGTATGTA  
TTTGTATTTGTAAAATACTTCTATCAATAAAATTTCTAATTCTCTAAAACAAAATCCAGTGACCTGCAGG  
CATGCGACGTCG

### Sequence of pH7LIC3.1.1-p23M11 (35S- p23M11)

GGGTACCCCTCGAATTATCATACATGAGAATTAAGGGAGTCACGTTATGACCCCGCCGATGACGCGGGACA  
AGCCGTTTTACGTTTGGAACTGACAGAACCGCAACGTTGAAGGAGCCACTGAGCCGCGGGTTTCTGGAGT  
TTAATGAGCTAAGCACATACGTCAGAAACCATTATTGCGCGTTCAAAAGTCGCCTAAGGTCACATCAGC  
TAGCAAATATTTCTTGTCAAAAATGCTCCACTGACGTTCCATAAATCCCCCTCGGTATCCAATTAGAGTC  
TCATATTCACCTCTCAACTCGAATCCCCCTATGAAAAAGCCTGAACTCACCGCGACGTCTGTGCGAGAAGT  
TTCTGATCGAAAAGTTCGACAGCGTCTCCGACCTGATGCAGCTCTCGGAGGGCGAAGAATCTCGTGCTTT  
CAGCTTCGATGTAGGAGGGCGTGGATATGTCTGCGGGTAAATAGCTGCGCCGATGGTTTCTACAAAGAT  
CGTTATGTTTATCGGCACTTTGCATCGGCCGCGCTCCCGATTCCGGAAGTGCTTGACATTGGGGAGTTCA  
GCGAGAGCCTGACCTATTGCATCTCCCGCCGTGCACAGGGTGTACGTTGCAAGACCTGCCTGAAACCGA  
ACTGCCCGCTGTTCTTCAGCCGGTCGCGGAGGCTATGGATGCTATCGCTGCGGCCGATCTTAGCCAGACG  
AGCGGGTTCGGCCCATTTCGGACCGCAAGGAATCGGTCAATACACTACATGGCGTGATTTTCATATGCGCGA  
TTGCTGATCCCATGTGTATCACTGGCAAACGTGTGATGGACGACACCGTCAGTGCGTCCGTCGCGCAGGC  
TCTCGATGAGCTGATGCTTTGGGCGAGGACTGCCCGAAGTCCGGCACTCGTGACGCGGATTTCGGCTCC  
AACAAATGTCTTGACGGACAATGGCCGCATAACAGCGGTCATTGACTGGAGCGAGGCGATGTTTCGGGGATT  
CCCAATACGAGGTCGCCAACATCTTCTTCTGAGGGCCGTGGTTGGCTTGATGGAGCAGCAGACGCGCTA  
CTTCGAGCGGAGGCATCCGGAGCTTGCAGGATCGCCAAGGCTCCGGGCGTATATGCTCCGCATTGGTCTT  
GACCAACTCTATCAGAGCTTGGTTGACGGCAATTTTCGATGATGCAGCTTGGGCGCAGGGTCGATGCGACG  
CAATCGTCCGATCCGGAGCCGGGACTGTCCGGGCTACACAAATCGCCCGCAGAAGCGCGGCCGTCTGGAC  
CGATGGCTGTGTAGAAGTACTCGCCGATAGTGAAACCGACGCCCCAGCACTCGTCCGAGGGCAAAGGAA  
TAGAGTAGATGCCGACCGAACAAGAGCTGATTTGAGAACGCCTCAGCCAGCAACTCGCGCGAGCCTAGC  
AAGGCAAAATGCGAGAGAACGGCCTTACGCTTGGTGGCACAGTTCTCGTCCACAGTTCGCTAAGCTCGCTC  
GGCTGGGTTCGCGGGAGGGCCGGTTCGAGTGATTACAGGAATTAATTCCTTAGAGTCAAGCAGATCGTTCAA  
ACATTTGGCAATAAAGTTTCTTAAGATTGAATCCTGTTGCCGGTCTTGCGATGATTATCATATAATTTCT  
GTTGAATTACGTTAAGCATGTAATAATTAACATGTAATGCATGACGTTATTTATGAGATGGGTTTTTATG  
ATTAGAGTCCCGCAATTATACATTTAATACGCGATAGAAAACAAAATATAGCGCGCAAACCTAGGATAAAT  
TATCGCGCGCGGTGTATCTATGTTACTAGATCGACCGCATGCAAGCTGATAATTCAATTCGGCGTTAA  
TTCAGTACATTAAAAACGTCCGCAATGTGTTATTAAGTTGTCTAAGCGTCAATTTGTTTACACCACAATA  
TATCCTGCCACCAGCCAGCCAACAGCTCCCCGACCGGCAGCTCGGCACAAAATCACCACCTCGATACAGGC  
AGCCCATCAGTCCGGGACGGCGTCAGCGGGAGAGCCGTTGTAAGGCGGCAGACTTTGCTCATGTTACCGA  
TGCTATTTCGGAAGAACGGCAACTAAGCTGCCGGGTTTGAACACGGATGATCTCGCGGAGGGTAGCATGT  
TGATTGTAACGATGACAGAGCGTTGCTGCCTGTGATCAATTCTGGGCACGAACCCAGTGGACATAAGCCTC  
GTTTCGGTTTCGTAAGCTGTAATGCAAGTAGCGTAAGTCCGTCACGCAACTGGTCCAGAACCTTGACCGAA  
CGCAGCGGTGGTAACGGCGCAGTGGCGGTTTTTCATGGCTTCTTGTTATGACATGTTTTTTTTGGGGTACAG  
TCTATGCCTCGGGCATCCAAGCAGCAAGCGGTTACGCCGTGGGTCGATGTTTGATGTTATGGAGCAGCA  
ACGATGTTACGCAGCAGGGCAGTCGCCCTAAAACAAAGTTAAACATCATGGGGGAAGCGGTGATCGCCGA  
AGTATCGACTCAACTATCAGAGGTAGTTGGCGTCATCGAGCGCCATCTCGAACCGACGTTGCTGGCCGTA  
CATTTGTACGGCTCCGCAGTGGATGGCGGCCTGAAGCCACACAGTGATATTGATTTGCTGGTTACGGTGA  
CCGTAAGGCTTGATGAAACAACGCGGCAGCTTTGATCAACGACCTTTTGGAAACTTCGGCTTCCCCTGG  
AGAGAGCGAGATTCTCCGCGCTGTAGAAGTCACCATTGTTGTGCACGACGACATCATTCGGTGGCGTTAT

CCAGCTAAGCGGAACTGCAATTTGGAGAATGGCAGCGCAATGACATTCTTGCAGGTATCTTCGAGCCAG  
CCACGATCGACATTGATCTGGCTATCTTGCTGACAAAAGCAAGAGAACATAGCGTTGCCTTGGTAGGTCC  
AGCGGCGGAGGAACTCTTTGATCCGGTTCCTGAACAGGATCTATTTGAGGCGCTAAATGAAACCTTAACG  
CTATGGAACCTCGCCGCCGACTGGGCTGGCGATGAGCGAAATGTAGTGCTTACGTTGTCCCGCATTTGGT  
ACAGCGCAGTAACCGGCAAAATCGCGCCGAAGGATGTGCTGCCGACTGGGCAATGGAGCGCCTGCCGGC  
CCAGTATCAGCCCGTCATACTTGAAGCTAGACAGGCTTATCTTGGACAAGAAGAAGATCGCTTGGCCTCG  
CGCGCAGATCAGTTGGAAGAATTTGTCCACTACGTGAAAGGCGAGATCACCAAGGTAGTCGGCAAATAAT  
GTCTAGCTAGAAATTCGTTCAAGCCGACGCCGCTTCGCCGGCGTTAACTCAAGCGATTAGATGCACTAAG  
CACATAATTGCTCACAGCCAAACTATCAGGTCAAGTCTGCTTTTATTATTTTAAAGCGTGCATAATAAGC  
CCTACACAAATTGGGAGATATATCATGCATGACCAAAATCCCTTAACGTGAGTTTTTCGTTCCACTGAGCG  
TCAGACCCCGTAGAAAAGATCAAAGGATCTTCTTGAGATCCTTTTTTTCTGCGCGTAATCTGCTGCTTGC  
AAACAAAAAACCACCGCTACCAGCGGTGGTTTGTTCGCCGATCAAGAGCTACCAACTCTTTTTCCGAA  
GGTAACTGGCTTCAGCAGAGCGCAGATACCAAATACTGTCTTCTAGTGTAGCCGTAGTTAGGCCACCAC  
TTCAAGAACTCTGTAGACCCGCTACATACCTCGCTCTGCTAATCCTGTTACCAGTGGCTGCTGCCAGTG  
GCGATAAGTCGTGTCTTACCGGGTTGGACTCAAGACGATAGTTACCGGATAAGGCGCAGCGGTGCGGGCTG  
AACGGGGGGTTTCGTGCACACAGCCAGCTTGGAGCGAACGACCTACACCGAACTGAGATACCTACAGCGT  
GAGCTATGAGAAAGCGCCACGCTTCCCGAAGGGGAGAAAGCGGACAGGTATCCGTAAGCGGCAGGGTCG  
GAACAGGAGAGCGCACGAGGGAGCTTCCAGGGGGAACGCCTGGTATCTTTATAGTCCTGTCGGGTTTTCG  
CCACCTCTGACTTGAGCGTCGATTTTTGTGATGCTCGTCAGGGGGGCGGAGCCTATGGAAAAACGCCAGC  
AACGCGGCCTTTTTACGGTTTCCTGGCCTTTTGCTGGCCTTTTGCTCACATGTTCTTTCTCGCTTATCCC  
CTGATTCTGTGGATAACCGTATTACCGCCTTTGAGTGAGCTGATACCGCTCGCCGACGCCGAACGACCGA  
GCGCAGCGAGTCAGTGAGCGAGGAAGCGGAAGAGCGCCTGATGCGGTATTTTCTCCTTACGCATCTGTGC  
GGTATTTACACCCGCATATGGTGCACCTCAGTACAATCTGCTCTGATGCCGCATAGTTAAGCCAGTATA  
CACTCCGCTATCGCTACGTGACTGGGTGATGGCTGCGCCCCGACACCCGCCAACACCCGCTGACGCGCCC  
TGACGGGCTTGTCTGCTCCCGGCATCCGCTTACAGACAAGCTGTGACCGTCTCCGGGAGCTGCATGTGTC  
AGAGGTTTTACCGTCATCACCGAAACGCGCGAGGCAGGGTGCCTTGATGTGGGCGCCGGCGGTGAGTG  
GCGACGGCGCGGCTTGTCCGCGCCTGGTAGATTGCCGTGCCGTAGGCCAGCCATTTTTGAGCGGCCAGC  
GGCCGCGATAGGCCGACGCGAAGCGCGGGGCGTAGGGAGCGCAGCGACCGAAGGGTAGGCGCTTTTTGC  
AGCTCTTCGGCTGTGCGCTGGCCAGACAGTTATGCACAGGCCAGGCGGGTTTTAAGAGTTTTAATAAGTT  
TTAAAGAGTTTTAGGCGGAAAAATCGCCTTTTTTCTCTTTTATATCAGTCACTTACATGTGTGACCGGTT  
CCCAATGTACGGCTTTGGGTTCCCAATGTACGGGTTCGGTTCCCAATGTACGGCTTTGGGTTCCCAATG  
TACGTGCTATCCACAGGAAAGAGACCTTTTCGACCTTTTCCCCTGCTAGGGCAATTTGCCCTAGCATCT  
GCTCCGTACATTAGGAACCGGCGGATGCTTCGCCCTCGATCAGGTTGCGGTAGCGCATGACTAGGATCGG  
GCCAGCCTGCCCCGCCTCCTCCTTCAAATCGTACTCCGGCAGGTCAATTTGACCCGATCAGCTTGCGCACG  
GTGAAACAGAACTTCTTGAACCTCTCCGGCGCTGCCACTGCGTTTCGTAGATCGTCTTGAACAACCATCTGG  
CTTCTGCCTTGCTGCGGCGCGGCGTGCCAGGCGGTAGAGAAAACGGCCGATGCCGGGATCGATCAAAAA  
GTAATCGGGGTGAACCGTCAGCACGTCCGGGTTCTTGCCCTTCTGTGATCTCGCGGTACATCCAATCAGCT  
AGCTCGATCTCGATGTACTCCGGCGGCCGGTTTCGCTCTTTACGATCTTGTAGCGGCTAATCAAGGCTT  
CACCCTCGGATACCGTCACCAGGCGGCCGTTCTTGCCCTTCTTCGTACGCTGCATGGCAACGTGCGTGGT  
GTTTAAACCGAATGCAGGTTTCTACCAGGTGCTTTTTCTGCTTTCCGCCATCGGCTCGCCGGCAGAAGTTG  
AGTACGTCCGCAACGTGTGGACGGAACACGCGGCCGGGCTTGCTCTCCCTTCCCTTCCCGGTATCGGTTCA  
TGGATTTCGGTTAGATGGGAAACGCCCATCAGTACCAGGTCGTAATCCACACACTGGCCATGCCGGCCGG  
CCCTGCGGAAACCTCTACGTGCCCCGTCTGGAAGCTCGTAGCGGATCACCTCGCCAGCTCGTCGGTCACGC  
TTTGACAGACGGAACCGCCACGTCCATGATGCTGCGACTATCGCGGTGCCACGTCATAGAGCATCG

GAACGAAAAAATCTGGTTGCTCGTCGCCCTTGGGCGGCTTCCTAATCGACGGCGCACCGGCTGCCGGCGG  
TTGCCGGGATTCTTTGCGGATTCGATCAGCGGCCGCTTGCCACGATTCACCGGGGCGTGCTTCTGCCTCG  
ATGCGTTGCCGCTGGGCGGCCTGCGCGGCCTTCAACTTCTCCACCAGGTCATCACCCAGCGCCGCGCCGA  
TTTGTACCGGGCCGGATGGTTTGCACCGTCACGCCGATTCTCGGGCTTGGGGGTTCAGTGCCATTGC  
AGGGCCGGCAGACAACCCAGCCGCTTACGCCTGGCCAACCGCCCGTTCTCCACACATGGGGCATTCCAC  
GGCGTCGGTGCCCTGGTTGTCTTGATTTTCCATGCCGCCCTCCTTTAGCCGCTAAAATTCATCTACTCATT  
TATTCATTGCTCATTTACTCTGGTAGCTGCGCGATGTATTAGATAGCAGCTCGGTAATGGTCTTGCCCT  
TGGCGTACCGCTACATCTTCAGCTTGGTGTGATCCTCCGCCGCAACTGAAAGTTGACCCGCTTCATGG  
CTGGCGTGTCTGCCAGGCTGGCCAACGTTGCAGCCTTGCTGCTGCGTGCGCTCGGACGGCCGGCACTTAG  
CGTGTTTGTGCTTTTGCTCATTTTCTCTTTACCTCATTAACCTCAAATGAGTTTTGATTTAATTTACGCGG  
CCAGCGCCTGGACCTCGCGGGCAGCGTCGCCCTCGGGTTCTGATTCAAGAACGGTTGTGCCGGCGGCGGC  
AGTGCCTGGGTAGCTCACGCGCTGCGTGATACGGGACTCAAGAATGGGCAGCTCGTACCCGGCCAGCGCC  
TCGGCAACCTCACCGCCGATGCGCGTGCCCTTGATCGCCCGCGACACGACAAAGCCGCTTGATAGCCTTC  
CATCCGTGACCTCAATGCGCTGCTTAACCAGCTCCACCAGGTGCGCGGTGGCCCATATGTCGTAAGGGCT  
TGGCTGCACCGGAATCAGCACGAAGTCGGCTGCCTTGATCGCGGACACAGCCAAGTCCGCCGCCTGGGGC  
GCTCCGTGCGATCACTACGAAGTCGCGCCGGCCGATGGCCTTCACGTGCGGGTCAATCGTCGGGCGGTGCGA  
TGCCGACAACGGTTAGCGGTTGATCTTCCCGCACGGCCGCCAATCGCGGGCACTGCCCTGGGGATCGGA  
ATCGACTAACAGAACATCGGCCCCGGCGAGTTGCAGGGCGCGGGCTAGATGGGTTGCGATGGTTCGTCTTG  
CCTGACCCGCCTTTCTGGTTAAGTACAGCGATAACCTTCATGCGTTCCCTTGCGTATTTGTTTATTTAC  
TCATCGCATCATATACGCGAGCACCGCATGACGCAAGCTGTTTTACTCAAATACACATCACCTTTTTTAGA  
CGGCGGCGCTCGGTTTTCTTCAGCGGCCAAGCTGGCCGGCCAGGCCGCCAGCTTGGCATCAGACAAACGG  
CCAGGATTTTCATGCAGCCGCACGGTTGAGACGTGCGCGGGCGGCTCGAACACGTACCCGGCCGCGATCAT  
CTCCGCCTCGATCTCTTCGGTAATGAAAAACGGTTGTCCTGGCCGTCTGGTGCGGTTTCATGCTTGTT  
CCTCTTGCGGTTTCATTCTCGGCGGCCGCCAGGGCGTCGGCCTCGGTCAATGCGTCTCACGGAAGGCACC  
GCGCCGCCTGGCCTCGGTGGGCGTCACTTCCTCGCTGCGCTCAAGTGCGCGGTACAGGGTCGAGCGATGC  
ACGCCAAGCAGTGCAGCCGCCTCTTTACGGTGCGGCCCTTCCTGGTCGATCAGCTCGCGGGCGTGCGCGA  
TCTGTGCCGGGGTGAGGGTAGGGCGGGGCCAAACTTCACGCCTCGGGCCTTGCGCGCCTCGCGCCCGCT  
CCGGGTGCGGTGCGATGATTAGGGAACGCTCGAACTCGGCAATGCCGGCGAACACGGTCAACACCATGCGG  
CCGGCCGGCGTGGTGGTGTCGGCCCACGGCTCTGCCAGGCTACGCAGGCCCGCGCCGGCCTCCTGGATGC  
GCTCGGCAATGTCCAGTAGGTGCGGGTGCTGCGGGCCAGGCGGTCTAGCCTGGTCACTGTCACAACGTC  
GCCAGGGCGTAGGTGGTCAAGCATCCTGGCCAGCTCCGGGCGGTGCGCCCTGGTGCCGGTGATCTTCTCG  
GAAAACAGCTTGGTGCAGCCGGCCGCGTGCAGTTCGGCCCGTTGGTTGGTCAAGTCTGGTCGTCGGTGC  
TGACGCGGGCATAGCCCAGCAGGCCAGCGCGGCGCTCTTGTTTCATGGCGTAATGTCTCCGGTTCTAGTC  
GCAAGTATTCTACTTTATGCGACTAAAACACGCGACAAGAAAACGCCAGGAAAAGGGCAGGGCGGCAGCC  
TGTCGCGTAACCTAGGACTTGTGCGACATGTCGTTTTTCAGAAGACGGCTGCACTGAACGTCAGAAGCCGA  
CTGCACTATAGCAGCGAGGGGTGGATCAAAGTACTTTGATCCCGAGGGGAACCTGTGGTTGGCATGC  
ACATACAAATGGACGAACGGATAAACCTTTTCACGCCCTTTTAAATATCCGTTATTCTAATAAACGCTCT  
TTTCTCTTAGGTTTACCCGCCAATATATCCTGTCAAACACTGATAGTTTAAACTGAAGGCGGGAAACGAC  
AATCTGATCCAAGCTCAAGCTAAGCTTGAGCTCTGCATGCCTGCAGGTCCCCAGATTAGCCTTTTCAATT  
TCAGAAAGAATGCTAACCCACAGATGGTTAGAGAGGCTTACGCAGCAGGTCTCATCAAGACGATCTACCC  
GAGCAATAATCTCCAGGAAATCAAATACCTTCCCAAGAAGGTTAAAGATGCAGTCAAAAGATTGAGGACT  
AACTGCATCAAGAACACAGAGAAAGATATATTTCTCAAGATCAGAAGTACTATTCCAGTATGGACGATTC  
AAGGCTTGCTTCACAAACCAAGGCAAGTAATAGAGATTGGAGTCTCTAAAAAGGTAGTTCCCACTGAATC  
AAAGGCCATGGAGTCAAAGATTCAAATAGAGGACCTAACAGAACTCGCCGTAAAGACTGGCGAACAGTTC

ATACAGAGTCTCTTACGACTCAATGACAAGAAGAAAATCTTCGTCAACATGGTGGAGCACCACACACTTG  
TCTACTCCAAAAATATCAAAGATACAGTCTCAGAAGACCAAAGGGCAATTGAGACTTTTCAACAAAGGGT  
AATATCCGGAAACCTCCTCGGATTCCATTGCCAGCTATCTGTCACTTTATTGTGAAGATAGTGGAAAAG  
GAAGGTGGCTCCTACAAATGCCATCATTGCGATAAAGGAAAGGCCATCGTTGAAGATGCCTCTGCCGACA  
GTGGTCCCAAAGATGGACCCCCACCCACGAGGAGCATCGTGGAAAAAGAAGACGTTCCAACCACGTCTTC  
AAAGCAAGTGGATTGATGTGATATCTCCACTGACGTAAGGGATGACGCACAATCCCACTATCCTTCGCAA  
GACCTTCTCTATATAAGGAAGTTCATTTTCAATTTGGAGAGAACACGGGGGACTCTAGAGGATCCAAGGA  
GATATAAGCCGCCACCATTGGATTACAAGGACGATGATGACAAGGACTACAAGGACGATGACGATAAGGAC  
TATAAGGATGACGATGACAAGGATTACGCCGAGGATGGATGATACTAGCGGACAAACTTTCGTTTCTGTG  
AACCTTTCTGACGAAAGCAACACGGCAAGCACTAAAGTTGAAAACGTAAAATCGGAAGCGGATCGCTTGG  
AGTTTTTACGTAAAATGAATCCCTTTATTGTTGACGCTCTGGTGCGGAAAACCAATTATCAGGGTGCTCG  
CTTTCGCGCAAGAATAATAGGAGTGTGCGTGGATTGTGGTAGAAAACACGACAAGGCGCTCAAGACTGAA  
CGTAAGTGTAAGGTCAACAACACGCAATCTCAGAACGAGGTGGCGCATATGTTGATGCACGATCCCGTTA  
AGTATTTGAACAAAAGAAAGGCTAGAGCCTTTTCTAACGCAGAGATGTTTGCGGCGGAAGTGGTTTCGTA  
CACCAAGGAAAGGCAATTGGCGGTGATTTAGCCGCTGAAAGGGAGAAGACGAGACTGGCTCGTAGACAC  
CCAATACGTTCTCCGGAAGAACTCCGGAACATTATAAATTCGGTATGACTGCTAAGGCAATGTTACCGG  
ACATCAACGCCGTAGACGTTGGTGATAACGAGGAACTTCGTGCGAGTACCCAGTGAGTCTGAGTGTTC  
TGGCGGAGTTCTCCGTGAACACCACTTCATCTGACCTAATGATATCCCGCGGCCATGCTAGAGTCCGCAA  
AAATCACCAGTCTCTCTCTACAAATCTATCTCTCTATTTTTCTCCAGAATAATGTGTGAGTAGTTCCT  
AGATAAGGGAATTAGGGTTCTTATAGGGTTTCGCTCATGTGTTGAGCATATAAGAAACCTTAGTATGTA  
TTTGTATTTGTAAAATACTTCTATCAATAAAATTTCTAATTCCTAAAACCAAATCCAGTGACCTGCAGG  
CATGCGACGTG

### **Sequence of pH7LIC3.1.1-p23M12 (35S- p23M12)**

GGGTACCTCGAATTATCATACATGAGAATTAAGGGAGTCACGTTATGACCCCGCCGATGACGCGGGACA  
AGCCGTTTTACGTTTGGAAGTACAGAACCGCAACGTTGAAGGAGCCACTGAGCCGCGGGTTTTCTGGAGT  
TTAATGAGCTAAGCACATACGTCAGAAACCATTATTGCGCGTTCAAAAGTCGCCTAAGGTCACTATCAGC  
TAGCAAATATTTCTTGTCAAAAATGCTCCACTGACGTTCCATAAATTCCTTCGGTATCCAATTAGAGTC  
TCATATTAAGTCTCAACTCGAATCCCCCTATGAAAAAGCCTGAACTCACCGCGACGTCTGTGAGAAGT  
TTCTGATCGAAAAGTTCGACAGCGTCTCCGACCTGATGCAGCTCTCGGAGGGCGAAGAATCTCGTGCTTT  
CAGCTTCGATGTAGGAGGGCGTGATATGTCTGCGGGTAAATAGCTGCGCCGATGGTTTTCTACAAAGAT  
CGTTATGTTTATCGGCACTTTGCATCGGCCGCGCTCCCGATTCCGGAAGTGCTTGACATTGGGGAGTTCA  
GCGAGAGCCTGACCTATTGCATCTCCCGCCGTGCACAGGGTGTCACGTTGCAAGACCTGCCTGAAACCGA  
ACTGCCCGCTGTTCTTCAGCCGGTCGCGGAGGCTATGGATGCTATCGTGCGGCCGATCTTAGCCAGACG  
AGCGGGTTTCGGCCCATTCGGACCGCAAGGAATCGGTCAATACACTACATGGCGTGATTTTATATGCGCGA  
TTGCTGATCCCCATGTGTATCACTGGCAAACTGTGATGGACGACACCGTCAGTGCGTCCGTCGCGCAGGC  
TCTCGATGAGCTGATGCTTTGGGCGAGGACTGCCCCGAAGTCCGGCACTCGTGACGCGGATTCGGCTCC  
AACAATGTCTGACGGACAATGGCCGCATAACAGCGGTCATTGACTGGAGCGAGGCGATGTTCCGGGATT  
CCCAATACGAGGTCGCCAACATCTTCTTCTGGAGGCCGTGGTTGGCTTGATGGAGCAGCAGACGCGCTA  
CTTCGAGCGGAGGATCCGGAGCTTGACAGGATCGCCAAGGCTCCGGGCGTATATGCTCCGCATTGGTCTT  
GACCAACTCTATCAGAGCTTGGTTGACGGCAATTTTCGATGATGCAGCTTGGGCGCAGGGTCGATGCGACG  
CAATCGTCCGATCCGGAGCCGGGACTGTGCGGCGTACACAAATCGCCCGCAGAAGCGCGGCCGTCTGGAC  
CGATGGCTGTGTAGAAGTACTCGCCGATAGTGGAACCGACGCCCCAGCACTCGTCCGAGGGCAAAGGAA  
TAGAGTAGATGCCGACCGAACAAGAGCTGATTTGAGAACGCTCAGCCAGCAACTCGCGCGAGCCTAGC



AAGGCAAATGCGAGAGAACGGCCTTACGCTTGGTGGCACAGTTCTCGTCCACAGTTCGCTAAGCTCGCTC  
GGCTGGGTGCGGGAGGGCCGGTCGCAGTGATTCAAGGAATTAATTCCTAGAGTCAAGCAGATCGTTCAA  
ACATTTGGCAATAAAGTTTCTTAAGATTGAATCCTGTTGCCGGTCTTGCGATGATTATCATATAATTTCT  
GTTGAATTACGTTAAGCATGTAATAATTAACATGTAATGCATGACGTTATTTATGAGATGGGTTTTTATG  
ATTAGAGTCCCGCAATTATACATTTAATACGCGATAGAAAACAAAATATAGCGCGCAAACCTAGGATAAAT  
TATCGCGCGGGTGTCTATGTTACTAGATCGACCGGCATGCAAGCTGATAATTCATTTCGGCGTTAA  
TTCAGTACATTAAAAACGTCCGCAATGTGTTATTAAGTTGTCTAAGCGTCAATTTGTTTACACCACAATA  
TATCCTGCCACCAGCCAGCCAACAGCTCCCCGACCGGCAGCTCGGCACAAAATCACCCTCGATACAGGC  
AGCCCATCAGTCCGGGACGGCGTCAGCGGGAGAGCCGTTGTAAGGCGGCAGACTTTGCTCATGTTACCGA  
TGCTATTCGGAAGAACGGCAACTAAGCTGCCGGGTTTGAACACGGATGATCTCGCGGAGGGTAGCATGT  
TGATTGTAACGATGACAGAGCGTTGCTGCCTGTGATCAATTCGGGCACGAACCCAGTGGACATAAGCCTC  
GTTCCGGTTCGTAAGCTGTAATGCAAGTAGCGTAAGTCCGTCACGCAACTGGTCCAGAACCTTGACCGAA  
CGCAGCGGTGGTAACGGCGCAGTGGCGGTTTTTCATGGCTTCTTGTTATGACATGTTTTTTTGGGGTACAG  
TCTATGCCTCGGGCATCCAAGCAGCAAGCGGTTACGCCGTGGGTCGATGTTTGATGTTATGGAGCAGCA  
ACGATGTTACGCAGCAGGGCAGTCGCCCTAAAACAAAGTTAAACATCATGGGGGAAGCGGTGATCGCCGA  
AGTATCGACTCAACTATCAGAGGTAGTTGGCGTCATCGAGCGCCATCTCGAACCGACGTTGCTGGCCGTA  
CATTTGTACGGCTCCGCAGTGGATGGCGGCTGAAGCCACACAGTGATATTGATTTGCTGGTTACGGTGA  
CCGTAAGGCTTGATGAAACAACGCGCGAGCTTTGATCAACGACCTTTTGAAACTTCGGCTTCCCTTG  
AGAGAGCGAGATTCTCCGCGCTGTAGAAGTCACCATTGTTGTGCACGACGACATCATTCGTTGGCGTTAT  
CCAGCTAAGCGCGAACTGCAATTTGGAGAATGGCAGCGCAATGACATTCTTGCGAGGTATCTTCGAGCCAG  
CCACGATCGACATTGATCTGGCTATCTTGCTGACAAAAGCAAGAGAACATAGCGTTGCCTTGGTAGGTCC  
AGCGGCGGAGGAACCTTTTGATCCGTTCTCTGAACAGGATCTATTTGAGGCGCTAAATGAAACCTTAACG  
CTATGGAACCTCGCCGCCGACTGGGCTGGCGATGAGCGAAATGTAGTGCTTACGTTGTCCCGCATTTGGT  
ACAGCGCAGTAACCGGCAAAATCGCGCCGAAGGATGTCGCTGCCGACTGGGCAATGGAGCGCTGCCGGC  
CCAGTATCAGCCGTCATACTTGAAGCTAGACAGGCTTATCTTGACAGAAGAAGATCGCTTGGCCTCG  
CGCGCAGATCAGTTGGAAGAATTTGTCCACTACGTGAAAGGCGAGATCACCAAGGTAGTCGGCAAATAAT  
GTCTAGCTAGAAATTCGTTCAAGCCGACGCCGCTTCGCCGGCGTTAACTCAAGCGATTAGATGCACTAAG  
CACATAATTGCTCACAGCCAACTATCAGGTCAAGTCTGCTTTTATTATTTTAAAGCGTGACATAATAAGC  
CCTACACAAATTGGGAGATATATCATGCATGACCAAAATCCCTTAACGTGAGTTTTCGTTCCACTGAGCG  
TCAGACCCCGTAGAAAAGATCAAAGGATCTTCTTGAGATCCTTTTTTCTGCGCGTAATCTGCTGCTTGC  
AAACAAAAAAACCACCGCTACCAGCGGTGGTTTGTGTTGCCGGATCAAGAGCTACCAACTCTTTTTCCGAA  
GGTAACTGGCTTCAGCAGAGCGCAGATACCAAATACTGTCTTCTAGTGTAGCCGTAGTTAGGCCACCAC  
TTCAAGAACTCTGTAGCACCGCTACATACCTCGCTCTGCTAATCCTGTTACAGTGGCTGCTGCCAGTG  
GCGATAAGTCTGTCTTACCGGTTGGACTCAAGACGATAGTTACCGGATAAGGCGCAGCGGTGCGGCTG  
AACGGGGGGTTGCTGCACACAGCCAGCTTGGAGCGAACGACCTACACCGAACTGAGATACCTACAGCGT  
GAGCTATGAGAAAGCGCCACGCTTCCCGAAGGGAGAAAGGCGGACAGGTATCCGGTAAGCGGCAGGGTCG  
GAACAGGAGAGCGCACGAGGGAGCTTCCAGGGGAAACGCTGGTATCTTTATAGTCTGTGCGGTTTCG  
CCACCTCTGACTTGAGCGTCGATTTTTGTGATGCTCGTCAGGGGGCGGAGCCTATGGAAAAACGCCAGC  
AACCGGCGCTTTTTACGGTTCTTGGCCTTTTGCTGGCCTTTTGCTCACATGTTCTTTCTGCGTTATCCC  
CTGATTCTGTGGATAACCGTATTACCGCCTTTGAGTGAGCTGATACCGCTCGCCGCAGCCGAACGACCGA  
GCGCAGCGAGTCAGTGAGCGAGGAAGCGGAAGAGCGCCTGATGCGGTATTTCTCCTTACGCATCTGTGC  
GGTATTTACACCGCATATGGTGCACCTCTCAGTACAATCTGCTCTGATGCCGCATAGTTAAGCCAGTATA  
CACTCCGCTATCGCTACGTGACTGGGTGATGGCTGCGCCCCGACACCCGCCAACACCCGCTGACGCGCCC  
TGACGGGCTTGTCTGCTCCCGCATCCGCTTACAGACAAGCTGTGACCGTCTCCGGGAGCTGCATGTGTC

AGAGGTTTTACCGTCATCACCGAAACGCGGAGGCAGGGTGCCTTGATGTGGGCGCCGGCGGTTCGAGTG  
GCGACGGCGCGGCTTGTCGCGCCCTGGTAGATTGCCTGGCCGTAGGCCAGCCATTTTTGAGCGGCCAGC  
GGCCGCGATAGGCCGACGCGAAGCGCGGGGCGTAGGGAGCGCAGCGACCGAAGGGTAGGCGCTTTTTGC  
AGCTCTTCGGCTGTGCGCTGGCCAGACAGTTATGCACAGGCCAGGCGGGTTTTAAGAGTTTTAATAAGTT  
TTAAAGAGTTTTAGGCGGAAAAATCGCCTTTTTTCTCTTTATATCAGTCACTTACATGTGTGACCGGTT  
CCCAATGTACGGCTTTGGGTTCCTAATGTACGGGTTCGGGTTCCTAATGTACGGCTTTGGGTTCCTAATG  
TACGTGCTATCCACAGGAAAGAGACCTTTTCGACCTTTTCCCCTGCTAGGGCAATTTGCCCTAGCATCT  
GCTCCGTACATTAGGAACCGGCGGATGCTTCGCCCTCGATCAGGTTGCGGTAGCGCATGACTAGGATCGG  
GCCAGCCTGCCCCGCTCCTCCTTCAAATCGTACTCCGGCAGGTCAATTTGACCCGATCAGCTTGCGCACG  
GTGAAACAGAACTTCTTGAACCTCCTCGGCGCTGCCACTGCGTTCGTAGATCGTCTTGAACAACCATCTGG  
CTTCTGCCTTGCTGCGCGCGGCGTGCCAGGCGGTAGAGAAAACGGCCGATGCCGGGATCGATCAAAAA  
GTAATCGGGGTGAACCGTCAGCACGTCCGGGTCTTGCTTCTGTGATCTCGCGGTACATCCAATCAGCT  
AGCTCGATCTCGATGTACTCCGGCCGCCGGTTTTCGCTCTTTACGATCTTGTAGCGGCTAATCAAGGCTT  
CACCTCGGATACCGTCACCAGGCGGCCGTTCTTGCCCTTCTTCGTACGCTGCATGGCAACGTGCGTGGT  
GTTTAACCGAATGCAGGTTTCTACCAGGTGCTCTTTCTGCTTTCCGCCATCGGCTCGCCGGCAGAACTTG  
AGTACGTCCGCAACGTGTGGACGGAACACGCGGCCGGGCTTGTCTCCCTTCCCTTCCCGGTATCGGTTCA  
TGGATTTCGGTTAGATGGGAAACGCCATCAGTACCAGGTGTAATCCACACACTGGCCATGCCGGCCGG  
CCCTGCGGAAACCTCTACGTGCCCCTGCGAAGCTCGTAGCGGATCACCTCGCCAGCTCGTCGGTCACGC  
TTCGACAGACGGAACCGCCACGTCCATGATGCTGCGACTATCGCGGGTGCCACGTCATAGAGCATCG  
GAACGAAAAAATCTGGTTGCTCGTCGCCCTTGGGCGGCTTCCTAATCGACGGCGCACCGGCTGCCGGCGG  
TTGCCGGGATTCTTTGCGGATTGATCAGCGGCCGCTTGCCACGATTACCGGGGCGTGCTTCTGCCTCG  
ATGCGTTGCCGCTGGGCGGCTGCGCGGCTTCAACTTCTCCACCAGGTCAATCACCAGCGCCGCGCCGA  
TTTGTACCGGGCCGATGGTTTGCGACCGTCACGCCGATTCTCGGGCTTGGGGGTCCAGTGCCATTGC  
AGGGCCGGCAGACAACCCAGCCGCTTACGCTTGCCAAACCGCCGTTCTCCACACATGGGGCATTCAC  
GGCGTCGGTGCTGTTGTTCTTGATTTTCCATGCCGCTCCTTTAGCCGCTAAAATTCATCTACTCATT  
TATTCATTTGCTCATTTACTCTGGTAGCTGCGGATGTATTCAGATAGCAGCTCGGTAATGGTCTTGCT  
TGGCGTACCGGTACATCTTCAGCTTGGTGTGATCTCCGCCGCACTGAAAGTTGACCCGCTTCATGG  
CTGGCGTGTCTGCCAGGCTGGCCAACGTTGCAGCCTTGCTGCTGCGTGCCTCGGACGGCCGGCACTTAG  
CGTGTTTGCTTTTTGCTCATTTTCTCTTTACCTCATTAACCTCAAATGAGTTTTGATTTAATTTACGCG  
CCAGCGCTTGACCTCGCGGGCAGCGTCGCCCTCGGGTTCTGATTCAAGAACGGTTGTGCCGGCGGGCG  
AGTGCCTGGGTAGCTCACGCGCTGCGTGATACGGGACTCAAGAATGGGCAGCTCGTACCCGGCCAGCGCC  
TCGGCAACCTCACCGCCGATGCGCGTGCCTTTGATCGCCCGGACACGACAAAGCCGCTTGATAGCCTTC  
CATCCGTGACCTCAATGCGCTGCTTAACCAGCTCCACCAGGTGCGCGGTGGCCCATATGTCGTAAGGGCT  
TGGCTGCACCGGAATCAGCACGAAGTCGGCTGCCTTGATCGCGGACACAGCCAAGTCCGCCGCTGGGGC  
GCTCCGTGATCACTACGAAGTCGCGCCGGCCGATGGCCTTACGTCGCGGTCAATCGTCGGGCGGTGCA  
TGCCGACAACGGTTAGCGGTTGATCTTCCCGCACGGCCGCCAATCGCGGGCACTGCCCTGGGGATCGGA  
ATCGACTAACAGAACATCGGCCCCGGCGAGTTGCAGGGCGCGGGCTAGATGGGTTGCGATGGTCTTG  
CCTGACCCGCTTTCTGGTTAAGTACAGCGATAACCTTCATGCGTTCCCTTGCGTATTTGTTATTTAC  
TCATCGCATCATATACGACGACCGCATGACGCAAGCTGTTTTACTCAAATACACATCACCTTTTTAGA  
CGGCGGCGCTCGGTTTCTTCAGCGGCCAAGCTGGCCGGCCAGGCCGCCAGCTTGGCATCAGACAAACCG  
CCAGGATTTTCATGCAGCCGACGGTTGAGACGTGCGCGGGCGGCTCGAACACGTACCCGGCCGCGATCAT  
CTCCGCTCGATCTCTTCGGTAATGAAAAACGGTTTCGTCTTGCCGCTCCTGGTGCGTTTTCATGCTTGTT  
CCTCTTGCGGTTCAATCTCGGCGGCCGCCAGGGCGTCGGCTCGGTCAATGCGTCTCACGGAAGGCACC  
GCGCCGCTGGCCTCGGTGGGCGTCACTTCCTCGCTGCGCTCAAGTGCAGGTACAGGGTCGAGCGATGC

ACGCCAAGCAGTGCAGCCGCTCTTTACGGTGCGGCCCTTCCTGGTCGATCAGCTCGCGGGCGTGCGCGA  
TCTGTGCCGGGGTGAGGGTAGGGCGGGGCCAAACTTCACGCCTCGGGCCTTGCGGCCTCGCGCCCGCT  
CCGGGTGCGGTGATGATTAGGGAACGCTCGAACTCGGCAATGCCGGCGAACACGGTCAACACCATGCGG  
CCGGCCGGCGTGGTGGTGTGCGGCCACGGCTCTGCCAGGCTACGCAGGCCCGCGCCGGCCTCTGGATGC  
GCTCGGCAATGTCCAGTAGGTGCGGGTGCTGCGGGCCAGGCGGTCTAGCCTGGTCACTGTCAACACGTC  
GCCAGGGCGTAGGTGGTCAAGCATCCTGGCCAGCTCCGGGCGGTGCGCCTGGTGCCGGTGATCTTCTCG  
GAAAACAGCTTGGTGCAGCCGGCCGCGTGCAGTTCGGCCCGTTGGTTGGTCAAGTCCTGGTCGTGCGTGC  
TGACGCGGGCATAGCCAGCAGGCCAGCGGCGGCGCTCTTGTTTCATGGCGTAATGTCTCCGGTTCTAGTC  
GCAAGTATTCTACTTTATGCGACTAAAACACGCGACAAGAAAACGCCAGGAAAAGGGCAGGGCGGCAGCC  
TGTCGCGTAACCTTAGGACTTGTGCGACATGTGCTTTTCAGAAGACGGCTGCACTGAACGTGAGAAGCCGA  
CTGCACTATAGCAGCGGAGGGGTGGATCAAAGTACTTTGATCCCGAGGGGAACCCTGTGGTTGGCATGC  
ACATACAAATGGACGAACGGATAAACCTTTTCACGCCCTTTTAAATATCCGTTATTCTAATAAACGCTCT  
TTTCTCTTAGGTTTACCCGCCAATATATCCTGTCAAACACTGATAGTTTAAACTGAAGGCGGGAAACGAC  
AATCTGATCCAAGCTCAAGCTAAGCTTGAGCTCTGCATGCCTGCAGGTCCCCAGATTAGCCTTTTCAATT  
TCAGAAAGAATGCTAACCCACAGATGGTTAGAGAGGCTTACGCAGCAGGTCTCATCAAGACGATCTACCC  
GAGCAATAATCTCCAGGAAATCAAATACCTTCCCAAGAAGGTTAAAGATGCAGTCAAAAGATTGAGGACT  
AACTGCATCAAGAACACAGAGAAAGATATATTTCTCAAGATCAGAAGTACTATTCCAGTATGGACGATTC  
AAGGCTTGCTTCACAAACCAAGGCAAGTAATAGAGATTGGAGTCTCTAAAAAGGTAGTTCCCACTGAATC  
AAAGGCCATGGAGTCAAAGATTCAAATAGAGGACCTAACAGAACTCGCCGTAAAGACTGGCGAACAGTTC  
ATACAGAGTCTCTTACGACTCAATGACAAGAAGAAAATCTTCGTCAACATGGTGGAGCACGACACACTTG  
TCTACTCCAAAAATATCAAAGATACAGTCTCAGAAGACCAAAGGGCAATTGAGACTTTTCAACAAAGGGT  
AATATCCGGAAACCTCCTCGGATTCCATTGCCCAGCTATCTGTCACTTTATTGTGAAGATAGTGAAAAG  
GAAGGTGGCTCCTACAAATGCCATCATTGCGATAAAGGAAAGGCCATCGTTGAAGATGCCTCTGCCGACA  
GTGGTCCCAAAGATGGACCCCCACCCACGAGGAGCATCGTGAAAAAGAAGACGTTCCAACCACGTCTTC  
AAAGCAAGTGATTGATGTGATATCTCCACTGACGTAAGGGATGACGCACAATCCCACTATCCTTCGCAA  
GACCTTCTCTATATAAGGAAGTTCATTTTCAATTTGGAGAGAACACGGGGGACTCTAGAGGATCCAAGGA  
GATATAAGCCGCCACCATGGATTACAAGGACGATGATGACAAGGACTACAAGGACGATGACGATAAGGAC  
TATAAGGATGACGATGACAAGGATTACGCCGAGGATGGATGATACTAGCGGACAACTTTCGTTTCTGTG  
AACCTTTCTGACGAAAGCAACACGGCAAGCACTAAAGTTGAAAACGTAAAATCGGAAGCGGATCGCTTGG  
AGTTTTTACGTAAAATGAATCCCTTTATTGTTGACGCTCTGGTGCGGAAAACCAATTATCAGGGTGCTCG  
CTTTCGCGCAAGAATAATAGGAGTGTCGTGGATTGTGGTAGAAAACACGACAAGGCGCTCAAGACTGAA  
CGTAAGTGTAAGGTCAACAACACGCAATCTCAGAACGAGGTGGCGCATATGTTGATGCACGATCCCGTTA  
AGTATTTGAACAAAAGAAAGGCTAGAGCCTTTTCTAACGCAGAGATGTTTGCGATTGAAGCGGTTTCGTA  
CACCAAGGAAAGGCAATTGGCGGTGATTTAGCCGCTGAAAGGGAGAAGACGAGACTGGCTCGTAGACAC  
CCAATACGTTCTCCGGAAGAACTCCGGAACATTATAAATTCGGTATGACTGCTAAGGCAATGTTACCGG  
ACATCAACGCCGTAGACGTTGGTGATAACGAGGAACTTCGTGCGAGTACCCAGTGAGTCTGAGTGTTTC  
TGGCGGAGTTCTCCGTGAACACCACCTTCATCTGACCTAATGATATCCCGCGCCATGCTAGAGTCCGCAA  
AAATCACCAGTCTCTCTACAAATCTATCTCTCTATTTTTCTCCAGAATAATGTGTGAGTAGTTCCTC  
AGATAAGGGAATTAGGGTTCTTATAGGGTTTCGCTCATGTGTTGAGCATATAAGAAACCCTTAGTATGTA  
TTTGTATTTGTAAAATACTTCTATCAATAAAATTTCTAATTCCTAAAACCAAAATCCAGTGACCTGCAGG  
CATGCGACGTCG

### Sequence of pH7LIC3.1.1-p23M13 (35S- p23M13)

GGGTACCTCGAATTATCATACATGAGAATTAAGGGAGTCACGTTATGACCCCGCCGATGACGCGGGACA

AGCCGTTTTACGTTTGGAAGTACAGAACCGCAACGTTGAAGGAGCCACTGAGCCGCGGGTTTCTGGAGT  
TTAATGAGCTAAGCACATACGTCAGAAACCATTATTGCGCGTTCAAAAGTCGCCTAAGGTCATATCAGC  
TAGCAAATATTTCTTGTCAAAAATGCTCCACTGACGTTCCATAAATCCCCCTCGGTATCCAATTAGAGTC  
TCATATTTACTCTCAACTCGAATCCCCCTATGAAAAAGCCTGAACTCACCGCGACGTCTGTGAGAAGT  
TTCTGATCGAAAAGTTCGACAGCGTCTCCGACCTGATGCAGCTCTCGGAGGGCGAAGAATCTCGTGCTTT  
CAGCTTCGATGTAGGAGGGCGTGGATATGTCTGCGGGTAAATAGCTGCGCCGATGGTTTCTACAAAGAT  
CGTTATGTTTATCGGCACTTTGCATCGGCCGCGCTCCCGATTCCGGAAGTGCTTGACATTGGGGAGTTCA  
GCGAGAGCCTGACCTATTGCATCTCCCGCCGTGCACAGGGTGTACGTTGCAAGACCTGCCTGAAACCGA  
ACTGCCCCTGTTCTTTCAGCCGGTTCGCGGAGGCTATGGATGCTATCGCTGCGGCCGATCTTAGCCAGACG  
AGCGGGTTCGGCCCCATTTCGGACCGCAAGGAATCGGTCAATACACTACATGGCGTGATTTTCATATGCGCGA  
TTGCTGATCCCCATGTGTATCACTGGCAAACGTGTGATGGACGACACCGTCAGTGCGTCCGTCGCGCAGGC  
TCTCGATGAGCTGATGCTTTGGGCGAGGACTGCCCCGAAGTCCGGCACTCGTGACGCGGATTTCGGCTCC  
AACAAATGTCTGACGGACAATGGCCGCATAACAGCGGTCAATTGACTGGAGCGAGGCGATGTTTCGGGGATT  
CCCAATACGAGGTCGCCAACATCTTCTTCTGGAGGCCGTGGTTGGCTTGATGGAGCAGCAGACGCGCTA  
CTTCGAGCGGAGGCATCCGGAGCTTGCAGGATCGCCAAGGCTCCGGGCGTATATGCTCCGCATTGGTCTT  
GACCAACTCTATCAGAGCTTGGTTGACGGCAATTTTCGATGATGCAGCTTGGGCGCAGGGTCGATGCGACG  
CAATCGTCCGATCCGGAGCCGGGACTGTGCGGCGTACACAAATCGCCCGCAGAAGCGCGGCCGTCTGGAC  
CGATGGCTGTGTAGAAGTACTCGCCGATAGTGAAACCGACGCCCCAGCACTCGTCCGAGGGCAAAGGAA  
TAGAGTAGATGCCGACCGAACAAGAGCTGATTTTCGAGAACGCCTCAGCCAGCAACTCGCGCGAGCCTAGC  
AAGGCAAATGCGAGAGAACGGCCTTACGCTTGGTGGCACAGTTCTCGTCCACAGTTCGCTAAGCTCGCTC  
GGCTGGGTTCGCGGGAGGGCCGGTTCGAGTGATTTCAGGAATTAATTCCTAGAGTCAAGCAGATCGTTCAA  
ACATTTGGCAATAAAGTTTCTTAAGATTGAATCCTGTTGCCGGTCTTGCGATGATTATCATATAATTTCT  
GTTGAATTACGTTAAGCATGTAATAATTAACATGTAATGCATGACGTTATTTATGAGATGGGTTTTTATG  
ATTAGAGTCCCGCAATTATACATTTAATACGCGATAGAAAAACAAATATAGCGCGCAAACTAGGATAAAT  
TATCGCGCGCGGTGTATCTATGTTACTAGATCGACCGCATGCAAGCTGATAATTCAATTCGGCGTTAA  
TTCAGTACATTAAAAACGTCCGCAATGTGTTATTAAGTTGTCTAAGCGTCAATTTGTTTACACCACAATA  
TATCCTGCCACCAGCCAGCCAACAGCTCCCCGACCGGCAGCTCGGCACAAAATCACCCTCGATACAGGC  
AGCCCATCAGTCCGGGACGGCGTCAGCGGGAGAGCCGTTGTAAGGCGGCAGACTTTGCTCATGTTACCGA  
TGCTATTCGGAAGAACGGCAACTAAGCTGCCGGGTTTGAAACACGGATGATCTCGCGGAGGGTAGCATGT  
TGATTGTAACGATGACAGAGCGTTGCTGCCTGTGATCAATTTCGGGCACGAACCCAGTGGACATAAGCCTC  
GTTCCGTTTCGTAAGCTGTAATGCAAGTAGCGTAAGTCCGTCACGCAACTGGTCCAGAACCCTTGACCGAA  
CGCAGCGGTGGTAACGGCGCAGTGGCGGTTTTTCATGGCTTCTTGTTATGACATGTTTTTTTTGGGGTACAG  
TCTATGCCTCGGGCATCCAAGCAGCAAGCGCGTTACGCCGTGGGTTCGATGTTTATGATGTTATGGAGCAGCA  
ACGATGTTACGCAGCAGGGCAGTCGCCCTAAAACAAAGTTAAACATCATGGGGGAAGCGGTGATCGCCGA  
AGTATCGACTCAACTATCAGAGGTAGTTGGCGTCATCGAGCGCCATCTCGAACCAGCGTTGCTGGCCGTA  
CATTTGTACGGCTCCGCAGTGGATGGCGGCCTGAAGCCACACAGTGATATTGATTTGCTGGTTACGGTGA  
CCGTAAGGCTTGATGAAACAACGCGCGAGCTTTGATCAACGACCTTTTGAAACTTCGGCTTCCCCTGG  
AGAGAGCGAGATTCTCCGCGCTGTAGAAGTACCATTGTTGTGCACGACGACATCATTCCTGGCGTTAT  
CCAGCTAAGCGCGAACTGCAATTTGGAGAATGGCAGCGCAATGACATTCTTGACAGGTATCTTCGAGCCAG  
CCACGATCGACATTGATCTGGCTATCTTGCTGACAAAAGCAAGAGAACATAGCGTTGCCTTGGTAGGTCC  
AGCGGCGGAGGAACCTTTGATCCGGTTCTGAACAGGATCTATTTGAGGCGCTAAATGAAACCTTAACG  
CTATGGAAGTTCGCCGCCGACTGGGCTGGCGATGAGCGAAATGTAGTGCTTACGTTGTCCCGCATTTGGT  
ACAGCGCAGTAACCGGCAAAATCGCGCCGAAGGATGTGCTGCCGACTGGGCAATGGAGCGCCTGCCGGC  
CCAGTATCAGCCGTCATACTTGAAGCTAGACAGGCTTATCTTGACAAAGAAGAAGATCGCTTGGCCTCG

CGCGCAGATCAGTTGGAAGAATTTGTCCACTACGTGAAAGGCGAGATCACCAAGGTAGTCGGCAAATAAT  
GTCTAGCTAGAAATTCGTTCAAGCCGACGCCGCTTCGCCGGCGTTAACTCAAGCGATTAGATGCACTAAG  
CACATAATTGCTCACAGCCAAACTATCAGGTCAAGTCTGCTTTTATTATTTTAAAGCGTGATAATAAGC  
CCTACACAAATTGGGAGATATATCATGCATGACCAAAATCCCTTAACGTGAGTTTTTCGTTCCACTGAGCG  
TCAGACCCCGTAGAAAAGATCAAAGGATCTTCTTGAGATCCTTTTTTTCTGCGCGTAATCTGCTGCTTGC  
AAACAAAAAAACCACCGCTACCAGCGGTGGTTTGTTCGCCGGATCAAGAGCTACCAACTCTTTTTCCGAA  
GGTAACTGGCTTCAGCAGAGCGCAGATACCAAATACTGTCTTCTAGTGTAGCCGTAGTTAGGCCACCAC  
TTCAAGAACTCTGTAGCACCAGCTACATACCTCGCTCTGCTAATCCTGTTACCAGTGGCTGCTGCCAGTG  
GCGATAAGTCGTGTCTTACCGGGTTGGACTCAAGACGATAGTTACCGGATAAGGCGCAGCGGTTCGGGCTG  
AACGGGGGGTTTCGTGCACACAGCCCAGCTTGGAGCGAACGACCTACACCGAACTGAGATACCTACAGCGT  
GAGCTATGAGAAAGCGCCACGCTTCCCGAAGGGAGAAAGGCGGACAGGTATCCGGTAAGCGGCAGGGTCG  
GAACAGGAGAGCGCACGAGGGAGCTTCCAGGGGGAACGCTGGTATCTTTATAGTCTGTTCGGGTTTCG  
CCACCTCTGACTTGAGCGTCGATTTTTGTGATGCTCGTCAGGGGGCGGAGCCTATGGAAAAACGCCAGC  
AACGCGGCCTTTTTACGGTTTCTGGCCTTTTGCTGGCCTTTTGCTCACATGTTCTTTCTGCGTTATCCC  
CTGATTCTGTGGATAACCGTATTACCGCCTTTGAGTGAGCTGATACCGCTCGCCGCAGCCGAACGACCGA  
GCGCAGCGAGTCAGTGAGCGAGGAAGCGGAAGAGCGCCTGATGCGGTATTTTCTCCTTACGCATCTGTGC  
GGTATTTACACCCGCATATGGTGCACCTCAGTACAATCTGCTCTGATGCCGCATAGTTAAGCCAGTATA  
CACTCCGCTATCGCTACGTGACTGGGTGATGGCTGCGCCCCGACACCCGCCAACACCCGCTGACGCGCCC  
TGACGGGCTTGTCTGCTCCCGGCATCCGCTTACAGACAAGCTGTGACCGTCTCCGGGAGCTGCATGTGTC  
AGAGGTTTTACCGTCAATCACCGAAACGCGCGAGGCAGGGTGCCTTGATGTGGGCGCCGGCGGTTCGAGTG  
GCGACGGCGCGGCTTGTCGCGCCCTGGTAGATTGCCTGGCCGTAGGCCAGCCATTTTTGAGCGGCCAGC  
GGCCGCGATAGGCCGACGCGAAGCGCGGGGCGTAGGGAGCGCAGCGACCGAAGGGTAGGCGCTTTTTGC  
AGCTCTTCGGCTGTGCGCTGGCCAGACAGTTATGCACAGGCCAGGCGGGTTTTAAGAGTTTTAATAAGTT  
TTAAGAGTTTTAGGCGGAAAAATCGCCTTTTTTCTCTTTTATATCAGTCACTTACATGTGTGACCGGTT  
CCCAATGTACGGCTTTGGGTTCCCAATGTACGGGTTCCCGTTCCCAATGTACGGCTTTGGGTTCCCAATG  
TACGTGCTATCCACAGGAAAGAGACCTTTTCGACCTTTTTCCCCTGCTAGGGCAATTTGCCCTAGCATCT  
GCTCCGTACATTAGGAACCGGCGGATGCTTCGCCCTCGATCAGGTTGCGGTAGCGCATGACTAGGATCGG  
GCCAGCTGCCCCGCTCCTCCTTCAAATCGTACTCCGGCAGGTCAATTTGACCCGATCAGCTTGCGCACG  
GTGAAACAGAACTTCTTGAACCTCTCCGGCGCTGCCACTGCGTTCGTAGATCGTCTTGAACAACCATCTGG  
CTTCTGCCTTGCTGCGCGCGGGCGTGCAGGCGGTAGAGAAAACGGCCGATGCCGGGATCGATCAAAAA  
GTAATCGGGGTGAACCGTCAGCACGTCCGGGTTCTTGCCCTTCTGTGATCTCGCGGTACATCCAATCAGCT  
AGCTCGATCTCGATGTACTCCGGCCGCCCGGTTTCGCTCTTTACGATCTTGTAGCGGCTAATCAAGGCTT  
CACCTTCGGATACCGTCACCAGGCGGCCGTTCTTGCCCTTCTTCGTACGCTGCATGGCAACGTGCGTGGT  
GTTTAACCGAATGCAGGTTTCTACCAGTCTGCTTTCTGCTTTCCGCCATCGGCTCGCCGGCAGAACTTG  
AGTACGTCCGCAACGTGTGGACGGAACACGCGGCCGGGCTTGCTCTCCCTTCCCTTCCCGGTATCGGTTCA  
TGGATTTCGGTTAGATGGGAAACGCCATCAGTACCAGGTCGTAATCCACACACTGGCCATGCCGGCCGG  
CCCTGCGGAAACCTCTACGTGCCCCTGCTGGAAGCTCGTAGCGGATCACCTCGCCAGCTCGTCGGTACAGC  
TTTCACAGACGGAACCGCCACGTCCATGATGCTGCGACTATCGCGGGTGCCACGTATAGAGCATCG  
GAACGAAAAAATCTGGTTGCTCGTCGCCCTTGGGCGGCTTCCTAATCGACGGCGCACCGGCTGCCGGCGG  
TTGCCGGGATTCTTTGCGGATTGATCAGCGGCCGCTTGCCACGATTCACCGGGGCGTGCTTCTGCCTCG  
ATGCGTTGCCGCTGGGCGGCTGCGCGGCTTCAACTTCTCCACCAGGTCATACCCAGCGCCGCGCCGA  
TTTGTACCGGGCCGGATGGTTTTCGACCGTCACGCCGATTCCTCGGGCTTGGGGGTTCCAGTGCCATTGC  
AGGGCCGGCAGACAACCCAGCCGCTTACGCCTGGCCAACCGCCGTTCTTCCACACATGGGGCATTCAC  
GGCGTCGGTGCTGCTGTTGTTGATTTTCCATGCCGCTCCTTTAGCCGCTAAAATTCATCTACTCATT

TATTCATTTGCTCATTTACTCTGGTAGCTGCGGATGTATTCAGATAGCAGCTCGGTAATGGTCTTGCCCT  
TGGCGTACCGCGTACATCTTCAGCTTGGTGTGATCCTCCGCCGGCAACTGAAAGTTGACCCGCTTCATGG  
CTGGCGTGTCTGCCAGGCTGGCCAACGTTGCAGCCTTGCTGCTGCGTGCGCTCGGACGGCCGGCACTTAG  
CGTGTTTGTGCTTTTGTCTATTTTCTCTTTACCTCATTAACCAAATGAGTTTTGATTTAATTTTCAGCGG  
CCAGCGCCTGGACCTCGCGGGCAGCGTCGCCCTCGGGTTCTGATTCAAGAACGGTTGTGCCGGCGGCGGC  
AGTGCTTGGGTAGCTCACGCGCTGCGTGATACGGGACTCAAGAATGGGCAGCTCGTACCCGGCCAGCGCC  
TCGGCAACCTCACCGCCGATGCGCGTGCCCTTTGATCGCCCGCGACACGACAAAAGGCCGCTTGATAGCCTTC  
CATCCGTGACCTCAATGCGCTGCTTAACCAGCTCCACCAGGTGCGCGGTGGCCCATATGTCGTAAGGGCT  
TGGCTGCACCGGAATCAGCACGAAGTCGGCTGCCTTGATCGCGGACACAGCCAAGTCCGCCGCCTGGGGC  
GCTCCGTGATCACTACGAAGTCGCGCCGGCCGATGGCCTTCACGTGCGGGTCAATCGTCGGGCGGTGCGA  
TGCCGACAACGGTTAGCGGTTGATCTTCCCGCACGGCCGCCAATCGCGGGCACTGCCCTGGGGATCGGA  
ATCGACTAACAGAACATCGGCCCCGGCGAGTTGCAGGGCGCGGGCTAGATGGGTTGCGATGGTCTGCTTG  
CCTGACCCGCCTTTCTGGTTAAGTACAGCGATAACCTTCATGCGTTCCCTTGCGTATTTGTTATTTAC  
TCATCGCATCATATACGACGCGACCGCATGACGCAAGCTGTTTTACTCAAATACACATCACCTTTTTAGA  
CGGCGGCGCTCGGTTTTCTTCAGCGGCCAAGCTGGCCGGCCAGGCCGCCAGCTTGGCATCAGACAAACCGG  
CCAGGATTTTCATGCAGCCGCACGGTTGAGACGTGCGCGGGCGGCTCGAACACGTACCCGGCCGCGATCAT  
CTCCGCCTCGATCTCTTCGGTAATGAAAAACGGTTTCGTCTTGCCGTCTGCTGCGGTTTCATGCTTGTT  
CCTCTTGCGGTTTCATTCTCGGCGGCCGCGAGGGCGTCGGCTCGGTCAATGCGTCTCACGGAAGGCACC  
GCGCCGCCTGGCCTCGGTGGGCGTCACTTCCTCGCTGCGCTCAAGTGC GCGGTACAGGGTCGAGCGATGC  
ACGCCAAGCAGTGCAGCCGCCTCTTTTCAGGTGCGGCCCTTCCTGGTCGATCAGCTCGCGGGCGTGCGCGA  
TCTGTGCCGGGTGAGGGTAGGGCGGGGCCAACTTCACGCCTCGGGCCTTGCGGCCCTCGCGCCCGCT  
CCGGGTGCGGTGATGATTAGGGAACGCTCGAACTCGGCAATGCCGGCGAACACGGTCAACACCATGCGG  
CCGGCCGGCGTGGTGGTGTGCGGCCACGGCTCTGCCAGGCTACGCAGGCCCGCGCCGGCCTCCTGGATGC  
GCTCGGCAATGTCCAGTAGGTGCGGGTGCTGCGGGCCAGGCGGTCTAGCCTGGTCACTGTCAACAGCTC  
GCCAGGGCGTAGGTGGTCAAGCATCCTGGCCAGCTCCGGCGGTCGCGCCTGGTGCCGTTGATCTTCTCG  
GAAAACAGCTTGGTGACCCGGCCGCGTGACAGTTCGGCCCGTTGGTTGGTCAAGTCCTGGTCGTGCGTGC  
TGACGCGGGCATAGCCAGCAGGCCAGCGCGGCGCTCTTGTTTCATGGCGTAATGTCTCCGGTTCTAGTC  
GCAAGTATTCTACTTTATGCGACTAAAACACGCGACAAGAAAACGCCAGGAAAAGGGCAGGGCGGCAGCC  
TGTCGCGTAACCTTAGGACTTGTGCGACATGTCGTTTTTCAGAAGACGGCTGCACTGAACGTGAGAAGCCGA  
CTGCACTATAGCAGCGGAGGGGTTGGATCAAAGTACTTTGATCCCGAGGGGAACCCTGTGGTTGGCATGC  
ACATACAAATGGACGAACGGATAAACCTTTTCAGGCCCTTTTAAATATCCGTTATTCTAATAAACGCTCT  
TTTCTCTTAGGTTTACCCGCCAATATATCCTGTCAAACACTGATAGTTTAACTGAAGCGGGAAACGAC  
AATCTGATCCAAGCTCAAGCTAAGCTTGAGCTCTGCATGCCTGCAGGTCCCCAGATTAGCCTTTTCAATT  
TCAGAAAGAATGCTAACCCACAGATGGTTAGAGAGGCTTACGCAGCAGGTCTCATCAAGACGATCTACCC  
GAGCAATAATCTCCAGGAAATCAAATACCTTCCCAAGAAGGTTAAAGATGCAGTCAAAAGATTGAGGACT  
AACTGCATCAAGAACACAGAGAAAGATATATTTCTCAAGATCAGAAGTACTATTCCAGTATGGACGATTC  
AAGGCTTGCTTCACAAACCAAGGCAAGTAATAGAGATTGGAGTCTCTAAAAGGTAGTTCCCACTGAATC  
AAAGGCCATGGAGTCAAAGATTCAAATAGAGGACCTAACAGAACTCGCCGTAAAGACTGGCGAACAGTTC  
ATACAGAGTCTCTTACGACTCAATGACAAGAAGAAAATCTTCGTCAACATGGTGGAGCACGACACACTTG  
TCTACTCCAAAAATATCAAAGATACAGTCTCAGAAGACCAAAGGGCAATTGAGACTTTTCAACAAAGGGT  
AATATCCGGAAACCTCCTCGGATTCCATTGCCAGCTATCTGTCACTTTATTGTGAAGATAGTGGAAGG  
GAAGGTGGCTCCTACAAATGCCATCATTGCGATAAAGGAAAGGCCATCGTTGAAGATGCCTCTGCCGACA  
GTGGTCCCAAGATGGACCCCCACCCACGAGGAGCATCGTGGAAGAAAGACGTTCCAACCACGTCTTC  
AAAGCAAGTGGATTGATGTGATATCTCCACTGACGTAAGGGATGACGCACAATCCCACTATCCTTCGCAA

GACCCCTCCTCTATATAAGGAAGTTCATTTCAATTTGGAGAGAACACGGGGGACTCTAGAGGATCCAAGGA  
GATATAAGCCGCCACCATGGATTACAAGGACGATGATGACAAGGACTACAAGGACGATGACGATAAGGAC  
TATAAGGATGACGATGACAAGGATTACGCCGAGGATGGATGATACTAGCGGACAACTTTCGTTTTCTGTG  
AACCTTTCTGACGAAAGCAACACGGCAAGCACTAAAGTTGAAAACGTAAATCGGAAGCGGATCGCTTGG  
AGTTTTTACGTAAAATGAATCCCTTTATTTGTTGACGCTCTGGTGCGGAAAACCAATTATCAGGGTGCTCG  
CTTTCGCGCAAGAATAATAGGAGTGTGCGTGGATTGTGGTAGAAAACACGACAAGGCGCTCAAGACTGAA  
CGTAAGTGTAAGGTCAACAACACGCAATCTCAGAACGAGGTGGCGCATATGTTGATGCACGATCCCGTTA  
AGTATTTGAACAAAAGAAAGGCTAGAGCCTTTTCTAACGCAGAGATGTTTGCGATTGAACTGGTTTTCGTA  
CGCAGCAGCAAGGCAATTGGCGGTTCGATTTAGCCGCTGAAAGGGAGAAGACGAGACTGGCTCGTAGACAC  
CCAATACGTTCTCCGGAAGAACTCCGGAACATTATAAATTCGGTATGACTGCTAAGGCAATGTTACCGG  
ACATCAACGCCGTAGACGTTGGTGATAACGAGGAACTTCGTGCGAGTACCCAGTGAGTCTGAGTGTTC  
TGGCGGAGTTCTCCGTGAACACCACTTCATCTGACCTAATGATATCCCGCGGCCATGCTAGAGTCCGCAA  
AAATCACCAGTCTCTCTCTACAAATCTATCTCTCTATTTTTCTCCAGAATAATGTGTGAGTAGTTCCT  
AGATAAGGGAATTAGGGTTCTTATAGGGTTTCGCTCATGTGTTGAGCATATAAGAAACCCTTAGTATGTA  
TTTGTATTTGTAAAATACTTCTATCAATAAAATTTCTAATTCCTAAAACAAAATCCAGTGACCTGCAGG  
CATGCGACGTCG

### Sequence of pH7LIC3.1.1-p23M14 (35S- p23M14)

GGGTACCCTCGAATTATCATACATGAGAATTAAGGGAGTCACGTTATGACCCCGCCGATGACGCGGGACA  
AGCCGTTTTACGTTTGAACTGACAGAACCGCAACGTTGAAGGAGCCACTGAGCCGCGGGTTTTCTGGAGT  
TTAATGAGCTAAGCACATACGTCAGAAACCATTATTGCGCGTTCAAAAGTCGCCTAAGGTCATATCAGC  
TAGCAAATATTTCTTGTCAAAATGCTCCACTGACGTTCCATAAATTCCTTCGGTATCCAATTAGAGTC  
TCATATTTACTCTCAACTCGAATCCCCCTATGAAAAAGCCTGAACTCACCGCGACGTCTGTGAGAAGT  
TTCTGATCGAAAAGTTCGACAGCGTCTCCGACCTGATGCAGCTCTCGGAGGGCGAAGAATCTCGTGCTTT  
CAGCTTCGATGTAGGAGGGCGTGATATGTCTGCGGGTAAATAGCTGCGCCGATGGTTTTCTACAAAGAT  
CGTTATGTTTATCGGCACTTTGCATCGGCCGCGCTCCCGATTCCGGAAGTGCTTGACATTGGGGAGTTCA  
GCGAGAGCCTGACCTATTGCATCTCCCGCGGTGCACAGGGTGTCACGTTGCAAGACCTGCCTGAAACCGA  
ACTGCCGCTGTTCTTCAGCCGGTCGCGGAGGCTATGGATGCTATCGCTGCGGCCGATCTTAGCCAGACG  
AGCGGGTTCGGCCATTTCGGACCGCAAGGAATCGGTCAATACACTACATGGCGTGATTTCATATGCGCGA  
TTGCTGATCCCCATGTGTATCACTGGCAAATGTGATGGACGACACCGTCAGTGCGTCCGTCGCGCAGGC  
TCTCGATGAGCTGATGCTTTGGGCGAGGACTGCCCCGAAGTCCGGCACTCGTGACGCGGATTCGGCTCC  
AACAATGTCTGACGGACAATGGCCGCATAACAGCGGTCAATTGACTGGAGCGAGGCGATGTTTCGGGGATT  
CCCAATACGAGGTCGCCAACATCTTCTTCTGGAGGCCGTGGTTGGCTTGATGGAGCAGCAGACGCGCTA  
CTTCGAGCGGAGGCATCCGGAGCTTGCAGGATCGCCAAGGCTCCGGGCGTATATGCTCCGCATTGGTCTT  
GACCAACTCTATCAGAGCTTGGTTGACGCAATTTTCGATGATGCAGCTTGGGCGCAGGGTCGATGCGACG  
CAATCGTCCGATCCGGAGCCGGGACTGTGCGGCGTACACAAATCGCCCGCAGAAGCGCGGCCGTCTGGAC  
CGATGGCTGTGTAGAAGTACTCGCCGATAGTGGAACCGACGCCCCAGCACTCGTCCGAGGGCAAAGGAA  
TAGAGTAGATGCCGACCGAACAAGAGCTGATTTGAGAACGCCTCAGCCAGCAACTCGCGCAGCCTAGC  
AAGGCAAATGCGAGAGAACGGCCTTACGCTTGGTGGCACAGTTCTCGTCCACAGTTCGCTAAGCTCGCTC  
GGCTGGGTTCGCGGAGGGCCGGTTCGAGTGATTACAGGAATTAATTCCTTAGAGTCAAGCAGATCGTTCAA  
ACATTTGGCAATAAAGTTTCTTAAGATTGAATCCTGTTGCCGGTCTTGCGATGATTATCATATAATTTCT  
GTTGAATTACGTTAAGCATGTAATAATTAACATGTAATGCATGACGTTATTTATGAGATGGGTTTTTATG  
ATTAGAGTCCCGCAATTATACATTTAATACGCGATAGAAAACAAAATATAGCGCGCAAACCTAGGATAAAT  
TATCGCGCGGGTGTCTATGTTACTAGATCGACCGCATGCAAGCTGATAATTCATTCGGCGTTAA

TTCAGTACATTAAAAACGTCCGCAATGTGTTATTAAGTTGTCTAAGCGTCAATTTGTTTACACCACAATA  
TATCCTGCCACCAGCCAGCCAACAGCTCCCCGACCGGCAGCTCGGCACAAAATCACCCTCGATACAGGC  
AGCCCATCAGTCCGGGACGGCGTCAGCGGGAGAGCCGTTGTAAGGCGGCAGACTTTGCTCATGTTACCGA  
TGCTATTTCGGAAGAACGGCAACTAAGCTGCCGGGTTTGAAACACGGATGATCTCGCGGAGGGTAGCATGT  
TGATTGTAACGATGACAGAGCGTTGCTGCCTGTGATCAATTTCGGGCACGAACCCAGTGGACATAAGCCTC  
GTTCCGGTTCGTAAGCTGTAATGCAAGTAGCGTAAGTCCGCTCACGCAACTGGTCCAGAACCTTGACCGAA  
CGCAGCGGTGGTAACGGCGCAGTGGCGGTTTTTCATGGCTTCTTGTTATGACATGTTTTTTTTGGGGTACAG  
TCTATGCCTCGGGCATCCAAGCAGCAAGCGGTTACGCCGTGGGTCGATGTTTGATGTTATGGAGCAGCA  
ACGATGTTACGCAGCAGGGCAGTCGCCCTAAAACAAAGTTAAACATCATGGGGGAAGCGGTGATCGCCGA  
AGTATCGACTCAACTATCAGAGGTAGTTGGCGTCATCGAGCGCCATCTCGAACCGACGTTGCTGGCCGTA  
CATTTGTACGGCTCCGCAGTGGATGGCGGCCTGAAGCCACACAGTGATATTGATTTGCTGGTTACGGTGA  
CCGTAAGGCTTGATGAAACAACGCGGCAGCTTTGATCAACGACCTTTTGAAACTTCGGCTTCCCTTG  
AGAGAGCGAGATTCTCCGCGCTGTAGAAGTCACCATTGTTGTGCACGACGACATCATTCGCTGGCGTTAT  
CCAGCTAAGCGCGAACTGCAATTTGGAGAATGGCAGCGCAATGACATTCTGCAGGTATCTTCGAGCCAG  
CCACGATCGACATTGATCTGGCTATCTTGCTGACAAAAGCAAGAGAACATAGCGTTGCCTTGGTAGGTCC  
AGCGGCGGAGGAACCTTTTGATCCGTTCTCTGAACAGGATCTATTTGAGGCGCTAAATGAAACCTTAACG  
CTATGGAACCTCGCCGCCGACTGGGCTGGCGATGAGCGAAATGTAGTGCTTACGTTGTCCCGCATTTGGT  
ACAGCGCAGTAACCGGCAAAATCGCGCCGAAGGATGTCGCTGCCGACTGGGCAATGGAGCGCTGCCGGC  
CCAGTATCAGCCCGTCATACTTGAAGCTAGACAGGCTTATCTTGACAGAAGAAGATCGCTTGGCCTCG  
CGCGCAGATCAGTTGGAAGAATTTGTCCACTACGTGAAAGGCGAGATCACCAAGGTAGTCGGCAATAAT  
GTCTAGCTAGAAATTCGTTCAAGCCGACGCCGCTTCGCCGGCGTTAACTCAAGCGATTAGATGCACTAAG  
CACATAATTGCTCACAGCCAACTATCAGGTCAAGTCTGCTTTTATTATTTTAAAGCGTGATAATAAGC  
CCTACACAAATTGGGAGATATATCATGCATGACCAAAATCCCTTAACGTGAGTTTTTCGTTCCACTGAGCG  
TCAGACCCCGTAGAAAAGATCAAAGGATCTTCTTGAGATCCTTTTTTCTGCGCGTAATCTGCTGCTTGC  
AAACAAAAAAACCACCGCTACCAGCGGTGGTTTTGTTTGGCGGATCAAGAGCTACCAACTCTTTTTCCGAA  
GGTAAC TGCTTCAGCAGAGCGCAGATACCAAATACTGTCTTCTAGTGTAGCCGTAGTTAGGCCACCAC  
TTCAAGAACTCTGTAGCACC GCCTACATACCTCGCTCTGCTAATCCTGTTACCAGTGGCTGCTGCCAGTG  
GCGATAAGTCGTGTCTTACCGGTTGGACTCAAGACGATAGTTACCGGATAAGGCGCAGCGGTCCGGGCTG  
AACGGGGGGTTCTGTGCACACAGCCAGCTTGAGCGAACGACCTACACCGAACTGAGATACCTACAGCGT  
GAGCTATGAGAAAGCGCCACGCTTCCCGAAGGGAGAAAGGCGGACAGGTATCCGGTAAGCGGCAGGGTCG  
GAACAGGAGAGCGCACGAGGGAGCTTCCAGGGGGAAACGCCTGGTATCTTTATAGTCCTGTCCGGTTTTCG  
CCACCTCTGACTTGAGCGTCGATTTTTGTGATGCTCGTCAGGGGGGCGGAGCCTATGGAAAAACGCCAGC  
AACGCGGCCTTTTTACGGTTCTTGCCCTTTTGCTGGCCTTTTGCTCACATGTTCTTCTGCGTTATCCC  
CTGATTCTGTGGATAACCGTATTACCGCCTTTGAGTGAGCTGATACCGCTCGCCGACGCCGAACGACCGA  
GCGCAGCGAGTCAGTGAGCGAGGAAGCGGAAGAGCGCCTGATGCGGTATTTTCTCCTTACGCATCTGTGC  
GGTATTTACACCGCATATGGTGCACTCTCAGTACAATCTGCTCTGATGCCGCATAGTTAAGCCAGTATA  
CACTCCGCTATCGCTACGTGACTGGGT CATGGCTGCGCCCCGACACCCGCCAACACCCGCTGACGCGCCC  
TGACGGGCTTGTCTGCTCCCGGCATCCGCTTACAGACAAGCTGTGACCGTCTCCGGGAGCTGCATGTGTC  
AGAGGTTTTACCGTCATCACCGAAACGCGCGAGGCAGGGTGCCTTGATGTGGGCGCCGGCGGTTCGAGTG  
GCGACGGCGCGGCTTGTCGCGCCCTGGTAGATTGCCTGGCCGTAGGCCAGCCATTTTTGAGCGGCCAGC  
GGCCGCGATAGGCCGACGCGAAGCGCGGGGCGTAGGGAGCGCAGCGACCGAAGGGTAGGCGCTTTTTTG  
AGCTCTTCGGCTGTGCGCTGGCCAGACAGTTATGCACAGGCCAGGCGGGTTTTAAGAGTTTTAATAAGTT  
TTAAAGAGTTTTAGGCGGAAAAATCGCCTTTTTTCTCTTTTATATCAGTCACTTACATGTGTGACCGGTT  
CCCAATGTACGGCTTTGGGTTCCCAATGTACGGGTTCCGCTTCCCAATGTACGGCTTTGGGTTCCCAATG



TACGTGCTATCCACAGGAAAGAGACCTTTTCGACCTTTTCCCCTGCTAGGGCAATTTGCCCTAGCATCT  
GCTCCGTACATTAGGAACCGGCGGATGCTTCGCCCTCGATCAGGTTGCGGTAGCGCATGACTAGGATCGG  
GCCAGCCTGCCCCGCCTCCTCCTTCAAATCGTACTCCGGCAGGTCATTTGACCCGATCAGCTTGCGCACG  
GTGAAACAGAACTTCTTGAACCTCTCCGGCGCTGCCACTGCGTTCTGTAGATCGTCTTGAACAACCATCTGG  
CTTCTGCCTTGCTGCGGCGGCGGTGCCAGGCGGTAGAGAAAACGGCCGATGCCGGGATCGATCAAAAA  
GTAATCGGGGTGAACCGTCAGCACGTCCGGGTCTTGCCCTTCTGTGATCTCGCGGTACATCCAATCAGCT  
AGCTCGATCTCGATGTACTCCGGCCGCCGGTTTCGCTCTTTACGATCTTGTAGCGGCTAATCAAGGCTT  
CACCCTCGGATACCGTCACCAGGCGGCCGTTCTTGCCCTTCTTCGTACGCTGCATGGCAACGTGCGTGGT  
GTTTAACCGAATGCAGGTTTCTACCAGGTCGTCTTTCTGCTTTCCGCCATCGGCTCGCCGGCAGAACTTG  
AGTACGTCCGCAACGTGTGGACGGAACACGCGGCCGGGCTTGTCTCCCTTCCCTTCCCGGTATCGGTTCA  
TGGATTTCGGTTAGATGGGAAACGCCATCAGTACCAGGTCGTAATCCCACACACTGGCCATGCCGGCCGG  
CCCTGCGGAAACCTCTACGTGCCCGTCTGGAAGCTCGTAGCGGATCACCTCGCCAGCTCGTCGGTCACGC  
TTCGACAGACGGAACCGGCCACGTCCATGATGCTGCGACTATCGCGGGTGCCACGTATAGAGCATCG  
GAACGAAAAAATCTGGTTGCTCGTCGCCCTTGGGCGGCTTCCTAATCGACGGCGCACCGGCTGCCGGCGG  
TTGCCGGGATTCTTTGCGGATTTCGATCAGCGGCCGCTTGCCACGATTACCGGGGCGTGCTTCTGCCTCG  
ATGCGTTGCCGCTGGGCGGCCCTGCGCGGCTTCAACTTCTCCACCAGGTCATACCCAGCGCCGCGCCGA  
TTTGTACCGGGCCGATGGTTTGCGACCGTCACGCCGATTCTTCGGGCTTGGGGGTTCCAGTGCCATTGC  
AGGGCCGGCAGACAACCCAGCCGCTTACGCCTGGCCAACCGCCGTTCTCCACACATGGGGCATTCCAC  
GGCGTCGGTGCCCTGGTTGTCTTGATTTTCCATGCCGCTCCTTTAGCCGCTAAAATTCATCTACTCATT  
TATTCAATTTGCTCATTTACTCTGGTAGCTGCGCGATGTATTTCAGATAGCAGCTCGGTAATGGTCTTGCC  
TGGCGTACCGGTACATCTTCAGCTTGGTGTGATCTCCGCCGGCAACTGAAAGTTGACCCGCTTCATGG  
CTGGCGTGTCTGCCAGGCTGGCCAACGTTGCAGCCTTGCTGCTGCGTGCGCTCGACGGCCGGCAGTTAG  
CGTGTTTGTGCTTTTGCTCATTTTCTCTTTACCTCATTAACCTCAAATGAGTTTGTATTTAATTTACGCGG  
CCAGCGCTTGACCTCGCGGGCAGCGTCGCCCTCGGGTTCTGATTCAAGAACGGTTGTGCCGGCGGGCGGC  
AGTGCCTGGGTAGCTCACGCGCTGCGTGATACGGGACTCAAGAATGGGCAGCTCGTACCCGGCCAGCGCC  
TCGGCAACCTCACCGCCGATGCGCGTGCCCTTTGATCGCCCGCGACACGACAAAGGCCGCTTGTAGCCTTC  
CATCCGTGACCTCAATGCGCTGCTTAACCAGCTCCACCAGGTCGGCGGTGGCCCATATGTCGTAAGGGCT  
TGGCTGCACCGGAATCAGCACGAAGTCGGCTGCCTTGATCGCGGACACAGCCAAGTCCGCCGCTGGGGC  
GCTCCGTGATCACTACGAAGTCGCGCCGGCCGATGGCCTTCACGTGCGGGTCAATCGTCGGGCGGTTCGA  
TGCCGACAACGGTTAGCGGTGATCTTCCCGCACGGCCGCCAATCGCGGGCACTGCCCTGGGGATCGGA  
ATCGACTAACAGAACATCGGCCCCGGCGAGTTGCAGGGCGGGGCTAGATGGGTTGCGATGGTCTGCTTG  
CCTGACCCGCCTTTCTGGTTAAGTACAGCGATAACCTTCATGCGTTCCCCTTGCGTATTTGTTTATTAC  
TCATCGCATCATATACGACGACCGCATGACGCAAGCTGTTTTACTCAAATACACATCACCTTTTTAGA  
CGGCGGCGCTCGGTTTCTTCAGCGGCCAAGCTGGCCGGCCAGGCCGCCAGCTTGGCATCAGACAAACCGG  
CCAGGATTTTCATGCAGCCGCACGGTTGAGACGTGCGCGGGCGGCTCGAACACGTACCCGGCCGCGATCAT  
CTCCGCTCGATCTCTTCGGTAATGAAAAACGGTTTCGTCTGGCCGTCCTGGTGCGGTTTCATGCTTGTT  
CCTCTTGCGGTTTCAATCTCGGCGGCCGCCAGGGCGTCGGCTCGGTCAATGCGTCTCACGGAAGGCACC  
GCGCCGCTGGCCTCGGTGGGCGTCACTTCCTCGCTGCGCTCAAGTGC GCGGTACAGGGTCGAGCGATGC  
ACGCCAAGCAGTGCAGCCGCTCTTTACGGTGCGGCCTTCCTGGTTCGATCAGCTCGCGGGCGTGCGGA  
TCTGTGCCGGGTGAGGGTAGGGCGGGGCCAAACTTCAGCCTCGGGCCTTGGCGGCCCTCGCGCCCGCT  
CCGGGTGCGGTTCGATGATTAGGGAACGCTCGAACTCGGCAATGCCGGCGAACACGGTCAACACCATGCGG  
CCGGCCGGCGTGGTGGTGTGCGCCACGGCTCTGCCAGGCTACGCAGGCCCGCGCCGGCCTCCTGGATGC  
GCTCGGCAATGTCCAGTAGGTGCGGGTGCTGCGGGCCAGGCGGTCTAGCCTGGTCACTGTCAACACGTC  
GCCAGGGCGTAGGTGGTCAAGCATCCTGGCCAGCTCCGGGCGGTGCGCCTGGTGCCGGTATCTTCTCG

GAAAACAGCTTGGTGCAGCCGGCCGCGTGCAGTTCGGCCCCGTTGGTTGGTCAAGTCCTGGTCGTGCGGTGC  
TGACGCGGGCATAGCCCAGCAGGCCAGCGGCGGCGCTCTTGTTTCATGGCGTAATGTCTCCGGTTCTAGTC  
GCAAGTATTCTACTTTATGCGACTAAAACACGCGACAAGAAAACGCCAGGAAAAGGGCAGGGCGGCAGCC  
TGTCGCGTAACCTTAGGACTTGTGCGACATGTCGTTTTTCAGAAGACGGCTGCACTGAACGTCAGAAGCCGA  
CTGCACTATAGCAGCGAGGGGTTGGATCAAAGTACTTTGATCCCCAGGGGAACCCTGTGGTTGGCATGC  
ACATACAAATGGACGAACGGATAAACCTTTTCACGCCCTTTTAAATATCCGTTATTCTAATAAACGCTCT  
TTTCTCTTAGGTTTACCCGCCAATATATCCTGTCAAACACTGATAGTTTAAACTGAAGCGGGAAACGAC  
AATCTGATCCAAGCTCAAGCTAAGCTTGAGCTCTGCATGCCTGCAGGTCCCCAGATTAGCCTTTTCAATT  
TCAGAAAGAATGCTAACCCACAGATGGTTAGAGAGGCTTACGCAGCAGGTCTCATCAAGACGATCTACCC  
GAGCAATAATCTCCAGGAAATCAAATACCTTCCCAAGAAGGTTAAAGATGCAGTCAAAAGATTTCAGGACT  
AACTGCATCAAGAACACAGAGAAAGATATATTTCTCAAGATCAGAAGTACTATTCCAGTATGGACGATTC  
AAGGCTTGCTTCACAAACCAAGGCAAGTAATAGAGATTGGAGTCTCTAAAAAGGTAGTTCCCACTGAATC  
AAAGGCCATGGAGTCAAAGATTCAAATAGAGGACCTAACAGAACTCGCCGTAAAGACTGGCGAACAGTTTC  
ATACAGAGTCTCTTACGACTCAATGACAAGAAGAAAATCTTCGTCAACATGGTGGAGCACGACACACTTG  
TCTACTCCAAAAATATCAAAGATACAGTCTCAGAAGACC AAAAGGCAATTGAGACTTTTCAACAAAGGGT  
AATATCCGGAAACCTCCTCGGATTCCATTGCCCAGCTATCTGTCACTTTATTTGTGAAGATAGTGGAAAAG  
GAAGGTGGCTCCTACAAATGCCATCATTGCGATAAAGGAAAGGCCATCGTTGAAGATGCCTCTGCCGACA  
GTGGTCCCAAGATGGACCCCCACCCACGAGGAGCATCGTGAAAAAGAAGACGTTCCAACCACGTCTTC  
AAAGCAAGTGGATTGATGTGATATCTCCACTGACGTAAGGGATGACGCACAATCCCACTATCCTTCGCAA  
GACCTTCCCTCTATATAAGGAAGTTCATTTTCATTTGGAGAGAACACGGGGGACTCTAGAGGATCCAAGGA  
GATATAAGCCGCCACCATTGGATTACAAGGACGATGATGACAAGGACTACAAGGACGATGACGATAAGGAC  
TATAAGGATGACGATGACAAGGATTACGCCGAGGATGGATGATACTAGCGGACAACTTTCGTTTCTGTG  
AACCTTTCTGACGAAAGCAACACGGCAAGCACTAAAGTTGAAAACGTAAAATCGGAAGCGGATCGCTTGG  
AGTTTTTACGTAAAATGAATCCCTTTATTTGTTGACGCTCTGGTGCAGGAAAACCAATTATCAGGGTGCTCG  
CTTTCGCGCAAGAATAATAGGAGTGTGCGTGGAATTGTGGTAGAAAACACGACAAGGCGCTCAAGACTGAA  
CGTAAGTGTAAAGTCAACAACACGCAATCTCAGAACGAGGTGGCGCATATGTTGATGCACGATCCCGTTA  
AGTATTTGAACAAAAGAAAGGCTAGAGCCTTTTCTAACGCAGAGATGTTTGCGATTGAACTGGTTTCGTA  
CACCAAGGAAAGGCAATTGGCGGTGCGATTTAGCCGCTGAAGCGGCGAAGACGAGACTGGCTCGTAGACAC  
CCAATACGTTCTCCGGAAGAACTCCGGAACATTATAAATTCGGTATGACTGCTAAGGCAATGTTACCGG  
ACATCAACGCCGTAGACGTTGGTGATAACGAGGAACTTCGTGCGAGTACCCAGTGAGTCTGAGTGTTTC  
TGGCGGAGTTCTCCGTGAACACCACTTCATCTGACCTAATGATATCCCGCGGCCATGCTAGAGTCCGCAA  
AAATCACCAGTCTCTCTCTACAAATCTATCTCTCTATTTTTCTCCAGAATAATGTGTGAGTAGTTCCC  
AGATAAGGGAATTAGGGTTCTTATAGGGTTTCGCTCATGTGTTGAGCATATAAGAAACCCCTTAGTATGTA  
TTTGTATTTGTAAAATACTTCTATCAATAAAATTTCTAATTCCTAAAACAAAATCCAGTGACCTGCAGG  
CATGCGACGTCTG

### Sequence of pH7LIC3.1.1-p23M15 (35S- p23M15)

GGGTACCCCTGAATTATCATACATGAGAATTAAGGGAGTCACGTTATGACCCCGCCGATGACGCGGGACA  
AGCCGTTTTACGTTTGGAAGTACAGAACCGCAACGTTGAAGGAGCCACTGAGCCGCGGGTTTCTGGAGT  
TTAATGAGCTAAGCACATACGTCAGAAACCATTATTGCGCGTTCAAAAGTCGCCTAAGGTCACTATCAGC  
TAGCAAAATATTTCTGTCAAAAATGCTCCACTGACGTTCCATAAATTCCCCTCGGTATCCAATTAGAGTC  
TCATATTCACCTCTCAACTCGAATCCCCCTATGAAAAAGCCTGAACTCACCGCGACGTCTGTGAGAAGT  
TTCTGATCGAAAAGTTTCGACAGCGTCTCCGACCTGATGCAGCTCTCGGAGGGCGAAGAATCTCGTGCTTT  
CAGCTTCGATGTAGGAGGGCGTGATATGTCTGCGGGTAAATAGCTGCGCCGATGGTTTCTACAAAGAT

CGTTATGTTTATCGGCACTTTGCATCGGCCGCGCTCCCGATTCCGGAAGTGCTTGACATTGGGGAGTTCA  
GCGAGAGCCTGACCTATTGCATCTCCCGCCGTGCACAGGGTGTACGTTGCAAGACCTGCCTGAAACCGA  
ACTGCCCGCTGTTCTTCAGCCGGTCGCGGAGGCTATGGATGCTATCGCTGCGGCCGATCTTAGCCAGACG  
AGCGGGTTCGGCCCATTTCGGACCGCAAGGAATCGGTCAATACACTACATGGCGTGATTTTCATATGCGCGA  
TTGCTGATCCCCATGTGTATCACTGGCAAACGTGTGATGGACGACACCGTCAGTGCGTCCGTGCGCGAGGC  
TCTCGATGAGCTGATGCTTTGGGCGAGGACTGCCCGAAGTCCGGCACTCGTGACGCGGATTCGGCTCC  
AACAATGTCTTGACGGACAATGGCCGCATAACAGCGGTCAATTGACTGGAGCGAGGCGATGTTGGGGATT  
CCCAATACGAGGTCGCCAACATCTTCTTCTGAGGCCGTGGTTGGCTTGATGGAGCAGCAGACGCGCTA  
CTTCGAGCGGAGGCATCCGGAGCTTGCAGGATCGCCAAGGCTCCGGGCGTATATGCTCCGCATTGGTCTT  
GACCAACTCTATCAGAGCTTGGTTGACGGCAATTTTCGATGATGCAGCTTGGGCGCAGGGTCGATGCGACG  
CAATCGTCCGATCCGGAGCCGGGACTGTGGGGCGTACACAAATCGCCCGCAGAAGCGCGGCGGTCTGGAC  
CGATGGCTGTGTAGAAGTACTCGCCGATAGTGAAACCGACGCCCCAGCACTCGTCCGAGGGCAAAGGAA  
TAGAGTAGATGCCGACCGAACAAGAGCTGATTTGAGAACGCCTCAGCCAGCAACTCGCGCGAGCCTAGC  
AAGGCAAAATGCGAGAGAACGGCCTTACGCTTGGTGGCACAGTTCTCGTCCACAGTTCGTAAGCTCGCTC  
GGCTGGGTGCGGGGAGGGCCGGTCGCAGTGATTTCAGGAATTAATTCCCTAGAGTCAAGCAGATCGTTCAA  
ACATTTGGCAATAAAGTTTCTTAAGATTGAATCCTGTTGCCGGTCTTGGCATGATTATCATATAATTTCT  
GTTGAATTACGTTAAGCATGTAATAATTAACATGTAATGCATGACGTTATTTATGAGATGGGTTTTTATG  
ATTAGAGTCCCGCAATTATACATTTAATACGCGATAGAAAACAAAATATAGCGCGCAAACCTAGGATAAAT  
TATCGCGCGGGTGTCTATCTATGTTACTAGATCGACCGGCATGCAAGCTGATAATTCAATTCGGCGTTAA  
TTCAGTACATTAAAAACGTCCGCAATGTGTTATTAAGTTGTCTAAGCGTCAATTTGTTTACACCACAATA  
TATCCTGCCACCAGCCAGCCAACAGCTCCCCGACCGGCAGCTCGGCACAAAATCACCCTCGATACAGGC  
AGCCCATCAGTCCGGGACGGCGTCAGCGGGAGAGCCGTTGTAAGGCGGCAGACTTTGCTCATGTTACCGA  
TGCTATTCCGAAGAACGGCAACTAAGCTGCCGGGTTTGAACACGGATGATCTCGCGGAGGGTAGCATGT  
TGATTGTAACGATGACAGAGCGTTGCTGCCTGTGATCAATTCCGGCACGAACCCAGTGGACATAAGCCTC  
GTTCCGTTTCGTAAGCTGTAATGCAAGTAGCGTAAGTCCGCTCACGCAACTGGTCCAGAACCCTGACCGAA  
CGCAGCGGTGGTAACGGCGCAGTGGCGGTTTTTCATGGCTTCTTGTTATGACATGTTTTTTTTGGGGTACAG  
TCTATGCCTCGGGCATCCAAGCAGCAAGCGGTTACGCCGTGGGTCGATGTTTGATGTTATGGAGCAGCA  
ACGATGTTACGCAGCAGGGCAGTCGCCCTAAAACAAAGTTAAACATCATGGGGGAAGCGGTGATCGCCGA  
AGTATCGACTCAACTATCAGAGGTAGTTGGCGTCATCGAGCGCCATCTCGAACCAGCGTTGCTGGCCGTA  
CATTTGTACGGCTCCGCAGTGGATGGCGGCCTGAAGCCACACAGTGATATTGATTTGCTGGTTACGGTGA  
CCGTAAGGCTTGATGAAACAACGCGGCGAGCTTTGATCAACGACCTTTTGAAACTTCGGCTTCCCCTGG  
AGAGAGCGAGATTCTCCGCGCTGTAGAAGTCACCATTGTTGTGCACGACGACATCATTCCTGGCGTTAT  
CCAGCTAAGCGCGAACTGCAATTTGGAGAATGGCAGCGCAATGACATCTTGCAGGTATCTTCGAGCCAG  
CCACGATCGACATTGATCTGGCTATCTTGCTGACAAAAGCAAGAGAACATAGCGTTGCCTTGGTAGGTCC  
AGCGGCGGAGGAACCTTTTGATCCGGTTCCTGAACAGGATCTATTTGAGGCGCTAAATGAAACCTTAACG  
CTATGGAACCTCGCCGCCCCGACTGGGCTGGCGATGAGCGAAATGTAGTGCTTACGTTGTCCCGCATTTGGT  
ACAGCGCAGTAACCGGCAAAATCGCGCCGAAGGATGTGCTGCGCTGCGGACTGGGCAATGGAGCGCCTGCCGGC  
CCAGTATCAGCCCGTCATACTGAAGCTAGACAGGCTTATCTTGACAGAAGAAGATCGCTTGGCCTCG  
CGCGCAGATCAGTTGGAAGAATTTGTCCACTACGTGAAAGGCGAGATCACCAAGGTAGTCGGCAAATAAT  
GTCTAGCTAGAAATTCGTTCAAGCCGACGCCGCTTCGCCGGCGTTAACTCAAGCGATTAGATGCACTAAG  
CACATAATTGCTCACAGCCAACTATCAGGTCAAGTCTGCTTTTATTATTTTAAAGCGTGATAATAAGC  
CCTACACAAATTGGGAGATATATCATGCATGACCAAAATCCCTTAACGTGAGTTTTCGTTCCACTGAGCG  
TCAGACCCCGTAGAAAAGATCAAAGGATCTTCTTGAGATCCTTTTTTTCTGCGCGTAATCTGCTGCTTGC  
AAACAAAAAACCACCGCTACCAGCGGTGGTTTGGTTGCCGGATCAAGAGCTACCAACTCTTTTTCCGAA

GGTAACTGGCTTCAGCAGAGCGCAGATACCAAATACTGTCTTCTAGTGTAGCCGTAGTTAGGCCACCAC  
TTCAAGAACTCTGTAGCACCGCCTACATACCTCGCTCTGCTAATCCTGTTACCAGTGGCTGCTGCCAGTG  
GCGATAAGTCGTGTCTTACCGGGTTGGACTCAAGACGATAGTTACCGGATAAGGCGCAGCGGTGCGGGCTG  
AACGGGGGGTTTCGTGCACACAGCCCAGCTTGGAGCGAACGACCTACACCGAACTGAGATACCTACAGCGT  
GAGCTATGAGAAAGCGCCACGCTTCCCGAAGGGAGAAAGGCGGACAGGTATCCGGTAAGCGGCAGGGTCG  
GAACAGGAGAGCGCACGAGGGAGCTTCCAGGGGAAAACGCCTGGTATCTTTATAGTCCTGTCGGGTTTCG  
CCACCTCTGACTTGAGCGTCGATTTTTGTGATGCTCGTCAGGGGGCGGAGCCTATGGAAAAACGCCAGC  
AACGCGGCCTTTTTACGGTTTCTGGCCTTTTGCTGGCCTTTTGCTCACATGTTCTTTCTCGCTTATCCC  
CTGATTCTGTGGATAACCGTATTACCGCCTTTGAGTGAGCTGATACCGCTCGCCGCAGCCGAACGACCGA  
GCGCAGCGAGTCAGTGAGCGAGGAAGCGGAAGAGCGCCTGATGCGGTATTTTCTCCTTACGCATCTGTGC  
GGTATTTACACCGCATATGGTGACTCTCAGTACAATCTGCTCTGATGCCGCATAGTTAAGCCAGTATA  
CACTCCGCTATCGCTACGTGACTGGGTCATGGCTGCGCCCCGACACCCGCCAACACCCGCTGACGCGCCC  
TGACGGGCTTGTCTGCTCCCGGCATCCGCTTACAGACAACTGTGACCGTCTCCGGGAGCTGCATGTGTC  
AGAGGTTTTACCGTCATACCGAAACGCGCGAGGCAGGGTGCCTTGATGTGGGCGCCGGCGGTGAGTG  
GCGACGCGCGGCTTGTCCGCGCCCTGGTAGATTGCCCTGGCCGTAGGCCAGCCATTTTTGAGCGGCCAGC  
GGCCGCGATAGGCCGACGCGAAGCGGCGGGGCGTAGGGAGCGCAGCGACCGAAGGGTAGGCGCTTTTTGC  
AGCTCTTCGGCTGTGCGCTGGCCAGACAGTTATGCACAGGCCAGGCGGGTTTTAAGAGTTTTAATAAGTT  
TTAAAGAGTTTTAGGCGGAAAAATCGCCTTTTTTCTCTTTTATATCAGTCACTTACATGTGTGACCGGTT  
CCCAATGTACGGCTTTGGGTTCCTAATGTACGGGTTCCGGTTCCCAATGTACGGCTTTGGGTTCCTAATG  
TACGTGCTATCCACAGGAAAGAGACCTTTTCGACCTTTTCCCCTGCTAGGGCAATTTGCCTTAGCATCT  
GCTCCGTACATTAGGAACCGGCGGATGCTTCGCCCTCGATCAGGTTGCGGTAGCGCATGACTAGGATCGG  
GCCAGCCTGCCCCGCCTCCTCCTTCAAATCGTACTCCGGCAGGTCATTTGACCCGATCAGCTTGCGCACG  
GTGAAACAGAAGTTCTTGAAGTCTCCGGCGCTGCCACTGCGTTTCGTAGATCGTCTTGAACAACCATCTGG  
CTTCTGCCTTGCTGCGGCGCGGCGTGCCAGGCGGTAGAGAAAACGGCCGATGCCGGGATCGATCAAAAA  
GTAATCGGGGTGAACCGTCAGCACGTCCGGGTTCTTGCCCTTCTGTGATCTCGCGGTACATCCAATCAGCT  
AGCTCGATCTCGATGTACTCCGGCCGCCCGGTTTCGCTCTTTACGATCTTGTAGCGGCTAATCAAGGCTT  
CACCTCGGATACCGTCACCAGGCGGCCGTTCTTGCCCTTCTTCGTACGCTGCATGGCAACGTGCGTGGT  
GTTTAACCGAATGCAGGTTTCTACCAGGTCGTCTTTCTGCTTTCCGCCATCGGCTCGCCGGCAGAAGTTG  
AGTACGTCCGCAACGTGTGGACGGAACACGCGGCCGGGCTTGTCTCCCTTCCCTTCCCGGTATCGGTTCA  
TGGATTTCGGTTAGATGGGAAACGCCATCAGTACCAGGTCGTAATCCACACACTGGCCATGCCGGCCGG  
CCCTGCGGAAACCTCTACGTGCCCCGTCTGGAAGCTCGTAGCGGATCACCTCGCCAGCTCGTCGGTACGC  
TTTGACAGACGGAACCGCCACGTCCATGATGCTGCGACTATCGCGGTGCCACGTATAGAGCATCG  
GAACGAAAAAATCTGGTTGCTCGTCGCCCTTGGGCGGCTTCCTAATCGACGGCGCACCGGCTGCCGGCGG  
TTGCCGGGATTTCTTGCGGATTCGATCAGCGGCCGCTTGCCACGATTACCGGGGCGTGCTTCTGCCTCG  
ATGCGTTGCCGCTGGGCGGCTGCGCGGCTTCAACTTCTCCACCAGGTCATCACCCAGCGCCGCGCCGA  
TTTGTACCGGGCCGGATGGTTTGCAGCCGTCACGCCGATTCCTCGGGCTTGGGGGTTCCAGTGCCATTGC  
AGGGCCGCGCAGACAACCGACCGCTTACGCTTGCCAACCGCCGTTCTCCACACATGGGGCATTCCAC  
GGCGTCGGTGCTGGTTGTCTTGATTTTCCATGCCGCTCCTTTAGCCGCTAAAATTCATCTACTCATT  
TATTCATTTGCTCATTTACTCTGGTAGCTGCGCGATGTATTCAGATAGCAGCTCGGTAATGGTCTTGCCCT  
TGGCGTACCGCTACATCTTACGCTTGGTGTGATCCTCCGCCGGAAGTGAAGTTGACCCGCTTCATGG  
CTGGCGTGTCTGCCAGGCTGGCCAACGTTGCAGCCTTGCTGCTGCGTGCCTCGGACGGCCGGCACTTAG  
CGTGTTTGTGCTTTTGCTCATTTTCTCTTTACCTCATTAACCTCAAATGAGTTTTGATTTAATTTACGCGG  
CCAGCGCTTGGACCTCGCGGGCAGCGTCGCCCTCGGGTTCTGATTCAAGAACGGTTGTGCCGGCGCGCGC  
AGTGCCTGGGTAGCTCACGCGCTGCGTGATACGGGACTCAAGAATGGGCAGCTCGTACCCGGCCAGCGCC

TCGGCAACCTCACC GCCGATGCGCGTGCCTTTGATCGCCCCGACACGACAAAAGGCCGCTTGTAGCCTTC  
CATCCGTGACCTCAATGCGCTGCTTAACCAGCTCCACCAGGTGCGCGGTGGCCCATATGTCGTAAGGGCT  
TGGCTGCACCGGAATCAGCACGAAGTCGGCTGCCTTGATCGCGGACACAGCCAAGTCCGCCGCCTGGGGC  
GCTCCGTCGATCACTACGAAGTCGCGCCGGCCGATGGCCTTCACGTGCGGGTCAATCGTCGGGCGGTGCGA  
TGCCGACAACGGTTAGCGGTTGATCTTCCCGCACGGCCGCCAATCGCGGGCACTGCCCTGGGGATCGGA  
ATCGACTAACAGAACATCGGCCCGGCGAGTTGCAGGGCGCGGGCTAGATGGGTTGCGATGGTTCGTCTTG  
CCTGACCCGCCTTTCTGGTTAAGTACAGCGATAACCTTCATGCGTTCCCTTGCGTATTTGTTATTTAC  
TCATCGCATCATATACGCAGCGACCGCATGACGCAAGCTGTTTTACTCAAATACACATCACCTTTTTAGA  
CGGCGGCGCTCGGTTTCTTCAGCGGCCAAGCTGGCCGGCCAGGCCGCCAGCTTGGCATCAGACAAACCGG  
CCAGGATTTTCATGCAGCCGCACGGTTGAGACGTGCGCGGGCGGCTCGAACACGTACCCGGCCGCGATCAT  
CTCCGCCTCGATCTCTTCGGTAATGAAAAACGGTTTCGTCTGGCGTCCTGGTGCGGTTTCATGCTTGTT  
CCTCTTGCGGTTCAATCTCGGCGGCCGCCAGGGCGTCGGCTCGGTCAATGCGTCCTCACGGAAGGCACC  
GCGCCGCCTGGCCTCGGTGGGCGTCACTTCCTCGCTGCGCTCAAGTGC GCGGTACAGGGTCGAGCGATGC  
ACGCCAAGCAGTGCAGCCGCCTCTTTCACGGTGCGGCCTTCCTGGTCGATCAGCTCGCGGGCGTGCGGA  
TCTGTGCCGGGGTGAGGGTAGGGCGGGGCCAAACTTCACGCCTCGGGCCTTGCGGCCCTCGCGCCCGCT  
CCGGGTGCGGTGCGATGATTAGGGAACGCTCGAACTCGGCAATGCCGGCGAACACGGTCAACACCATGCGG  
CCGGCCGCGGTGGTGGTGTCGGCCCACGGCTCTGCCAGGCTACGCAGGCCCGCGCCGGCCTCCTGGATGC  
GCTCGGCAATGTCCAGTAGGTGCGGGTGCTGCGGGCCAGGCGGTCTAGCCTGGTCACTGTCAACACGTC  
GCCAGGGCGTAGGTGGTCAAGCATCCTGGCCAGCTCCGGGCGGTGCGGCCTGGTGCCGGTGATCTTCTCG  
GAAAACAGCTTGGTGACGCCGGCCGCGTGACAGTTCGGCCCGTTGGTTGGTCAAGTCCTGGTCGTCGGTGC  
TGACGCGGGCATAGCCAGCAGGCCAGCGCGGCGCTCTTGTTTCATGGCGTAATGTCTCCGGTTCTAGTC  
GCAAGTATTCTACTTTATGCGACTAAAACACGCGACAAGAAAACGCCAGGAAAAGGGCAGGGCGGCAGCC  
TGTCGCGTAACCTTAGGACTTGTGCGACATGTGCTTTTCAGAAGACGGCTGCACTGAACGTCAGAAGCCGA  
CTGCACTATAGCAGCGAGGGGTTGGATCAAAGTACTTTGATCCCGAGGGGAACCCTGTGGTTGGCATGC  
ACATACAAATGGACGAACGGATAAACCTTTTCACGCCCTTTTAAATATCCGTTATTCTAATAAACGCTCT  
TTTCTCTTAGGTTTACCCGCCAATATATCCTGTCAAACACTGATAGTTTAACTGAAGGCGGGAAACGAC  
AATCTGATCCAAGCTCAAGCTAAGCTTGAGCTCTGCATGCCTGCAGGTCCCAGATTAGCCTTTTCAATT  
TCAGAAAGAATGCTAACCCACAGATGGTTAGAGAGGCTTACGCAGCAGGTCTCATCAAGACGATCTACCC  
GAGCAATAATCTCCAGGAAATCAAATACCTTCCCAAGAAGGTTAAAGATGCAGTCAAAAGATTCAGGACT  
AACTGCATCAAGAACACAGAGAAAGATATATTTCTCAAGATCAGAAGTACTATTCCAGTATGGACGATTC  
AAGGCTTGCTTCACAAACCAAGGCAAGTAATAGAGATTGGAGTCTCTAAAAAGGTAGTTCCCACTGAATC  
AAAGGCCATGGAGTCAAAGATTCAAATAGAGGACCTAACAGAACTCGCCGTAAAGACTGGCGAACAGTTC  
ATACAGAGTCTCTTACGACTCAATGACAAGAAGAAAATCTTCGTCAACATGGTGGAGCACGACACACTTG  
TCTACTCCAAAAATATCAAAGATACAGTCTCAGAAGACCAAAGGGCAATTGAGACTTTTCAACAAAGGTT  
AATATCCGGAAACCTCCTCGGATTCCATTGCCAGCTATCTGTCACTTTATTGTGAAGATAGTGGAAGAG  
GAAGGTGGCTCCTACAAATGCCATCATTGCGATAAAGGAAAGGCCATCGTTGAAGATGCCTCTGCCGACA  
GTGGTCCCAAAGATGGACCCCCACCCACGAGGAGCATCGTGGAAGAAAGACGTTCCAACCACGTCTTC  
AAAGCAAGTGGATTGATGTGATATCTCCACTGACGTAAGGGATGACGCACAATCCCACTATCCTTCGCAA  
GACCCTTCTCTATATAAGGAAGTTCATTTTCAATTTGGAGAGAACACGGGGGACTCTAGAGGATCCAAGGA  
GATATAAGCCGCCACCATGGATTACAAGGACGATGATGACAAGGACTACAAGGACGATGACGATAAGGAC  
TATAAGGATGACGATGACAAGGATTACGCCGAGGATGGATGATACTAGCGGACAAACTTTCGTTTCTGTG  
AACCTTTCTGACGAAAGCAACACGGCAAGCACTAAAGTTGAAAACGTAAAATCGGAAGCGGATCGCTTGG  
AGTTTTTACGTAAAATGAATCCCTTTATTGTTGACGCTCTGGTGCGGAAAACCAATTATCAGGGTGCTCG  
CTTTCGCGCAAGAATAATAGGAGTGTGCGTGGATTGTGGTAGAAAACACGACAAGGCGCTCAAGACTGAA

CGTAAGTGTAAGGTCAACAACACGCAATCTCAGAACGAGGTGGCGCATATGTTGATGCACGATCCCGTTA  
AGTATTTGAACAAAAGAAAGGCTAGAGCCTTTTCTAACGCAGAGATGTTTGCGATTGAACTGGTTTCGTA  
CACCAAGGAAAGGCAATTGGCGGTTCGATTTAGCCGCTGAAAGGGAGAAGACGAGAGCGGCTCGTAGACAC  
CCAATACGTTCTCCGGAAGAAACTCCGGAACATTATAAATTCGGTATGACTGCTAAGGCAATGTTACCGG  
ACATCAACGCCGTAGACGTTGGTGATAACGAGGAAACTTCGTCGGAGTACCCAGTGAGTCTGAGTGTTTC  
TGGCGGAGTTCTCCGTGAACACCACTTCATCTGACCTAATGATATCCCGCGGCCATGCTAGAGTCCGCAA  
AAATCACCAGTCTCTCTCTACAAATCTATCTCTCTCTATTTTCTCCAGAATAATGTGTGAGTAGTTCCTC  
AGATAAGGGAATTAGGGTTCTTATAGGGTTTCGCTCATGTGTTGAGCATATAAGAAACCCCTTAGTATGTA  
TTTGTATTTGTAAAATACTTCTATCAATAAAATTTCTAATTCCTAAAACAAAATCCAGTGACCTGCAGG  
CATGCGACGTCG

### **Sequence of pH7LIC3.1.1-p23M16 (35S- p23M16)**

GGGTACCCTCGAATTATCATACATGAGAATTAAGGGAGTCACGTTATGACCCCGCCGATGACGCGGGACA  
AGCCGTTTTACGTTTGAACTGACAGAACCGCAACGTTGAAGGAGCCACTGAGCCGCGGGTTTCTGGAGT  
TTAATGAGCTAAGCACATACGTGAGAAACCATTATTGCGCGTTCAAAAGTCGCCTAAGGTCAGTATCAGC  
TAGCAAATATTTCTTGTCAAAAATGCTCCACTGACGTTCCATAAATTCCCCTCGGTATCCAATTAGAGTC  
TCATATTCAGTCTCAACTCGAATCCCCCTATGAAAAAGCCTGAACCTACCGCGACGTCTGTGAGAAGT  
TTCTGATCGAAAAGTTCGACAGCGTCTCCGACCTGATGCAGCTCTCGGAGGGCGAAGAATCTCGTGCTTT  
CAGCTTCGATGTAGGAGGGCGTGGATATGTCTGCGGGTAAATAGCTGCGCCGATGGTTTCTACAAAGAT  
CGTTATGTTTATCGGCACCTTTGCATCGGCCGCGCTCCCGATTCCGGAAGTGCTTGACATTGGGGAGTTCA  
GCGAGAGCCTGACCTATTGCATCTCCCGCCGTGCACAGGGTGTACGTTGCAAGACCTGCCTGAAACCGA  
ACTGCCCGCTGTTCTTCAGCCGGTTCGCGGAGGCTATGGATGCTATCGCTGCGGCCGATCTTAGCCAGACG  
AGCGGGTTCGGGCCATTTCGGACCGCAAGGAATCGGTCAATACACTACATGGCGTGATTTTCATATGCGCGA  
TTGCTGATCCCCATGTGTATCACTGGCAAACTGTGATGGACGACACCGTCAGTGCGTCCGTCGCGCAGGC  
TCTCGATGAGCTGATGCTTTGGGCGAGGACTGCCCGAAGTCCGGCACTCGTGACGCGGATTCGGCTCC  
AACAATGTCTTGACGGACAATGGCCGCATAACAGCGGTCATTGACTGGAGCGAGGCGATGTTTCGGGGATT  
CCCAATACGAGGTCGCCAACATCTTCTTCTGAGGCGGTGGTTGGCTTGATGGAGCAGCAGACGCGCTA  
CTTCGAGCGGAGGCATCCGGAGCTTGCAAGATCGCCAAGGCTCCGGGCGTATATGCTCCGCATTGGTCTT  
GACCAACTCTATCAGAGCTTGTTGACGGCAATTTTCGATGATGCAGCTTGGGCGCAGGGTCGATGCGACG  
CAATCGTCCGATCCGGAGCCGGGACTGTCCGGGCTACACAAATCGCCCGCAGAAGCGCGGCCGTCTGGAC  
CGATGGCTGTGTAGAAGTACTCGCCGATAGTGAAACCGACGCCCCAGCACTCGTCCGAGGGCAAAGGAA  
TAGAGTAGATGCCGACCGAACAAGAGCTGATTTTCGAGAACGCCTCAGCCAGCAACTCGCGCGAGCCTAGC  
AAGGCAAATGCGAGAGAACGGCCTTACGCTTGGTGGCACAGTTCTCGTCCACAGTTCGCTAAGCTCGCTC  
GGCTGGGTTCGCGGGAGGGCCGGTTCGAGTGATTTCAGGAATTAATTCCTAGAGTCAAGCAGATCGTTCAA  
ACATTTGGCAATAAAGTTTCTTAAGATTGAATCCTGTTGCCGGTCTTGCGATGATTATCATATAATTTCT  
GTTGAATTACGTTAAGCATGTAATAATTAACATGTAATGCATGACGTTATTTATGAGATGGGTTTTTATG  
ATTAGAGTCCCGCAATTATACATTTAATACGCGATAGAAAACAAAATATAGCGCGCAAACCTAGGATAAAT  
TATCGCGCGGGTGTATCTATGTTACTAGATCGACCGCATGCAAGCTGATAATTCAATTCGGCGTTAA  
TTCAGTACATTAAAAACGTCCGCAATGTGTTATTAAGTTGTCTAAGCGTCAATTTGTTTACACCACAATA  
TATCCTGCCACCAGCCAGCCAACAGCTCCCCGACCGGCAGCTCGGCACAAAATCACCCTCGATACAGGC  
AGCCCATCAGTCCGGGACGGCGTCAGCGGGAGAGCCGTTGTAAGGCGGCAGACTTTGCTCATGTTACCGA  
TGCTATTCGGAAGAACGGCAACTAAGCTGCCGGGTTTGAAACACGGATGATCTCGCGGAGGGTAGCATGT  
TGATTGTAACGATGACAGAGCGTTGCTGCCTGTGATCAATTCGGGCACGAACCCAGTGGACATAAGCCTC  
GTTCCGTTTCGTAAGCTGTAATGCAAGTAGCGTAAGTCCGTCACGCAACTGGTCCAGAACCTTGACCGAA

CGCAGCGGTGGTAACGGCGCAGTGGCGGTTTTTCATGGCTTCTTGTTATGACATGTTTTTTTTGGGGTACAG  
TCTATGCCTCGGGCATCCAAGCAGCAAGCGCGTTACGCCGTGGGTCGATGTTTGATGTTATGGAGCAGCA  
ACGATGTTACGCAGCAGGGCAGTCGCCCTAAAACAAAGTTAAACATCATGGGGGAAGCGGTGATCGCCGA  
AGTATCGACTCAACTATCAGAGGTAGTTGGCGTCATCGAGCGCCATCTCGAACCGACGTTGCTGGCCGTA  
CATTTGTACGGCTCCGCAGTGGATGGCGGCCTGAAGCCACACAGTGATATTGATTTGCTGGTTACGGTGA  
CCGTAAGGCTTGATGAAACAACGCGGCAGCTTTGATCAACGACCTTTTGAAACTTCGGCTTCCCCTGG  
AGAGAGCGAGATTCTCCGCGCTGTAGAAGTCACCATTGTTGTGTCACGACGACATCATTCGCTGGCGTTAT  
CCAGCTAAGCGCAACTGCAATTTGGAGAATGGCAGCGCAATGACATTCTTGAGGTATCTTCGAGCCAG  
CCACGATCGACATTGATCTGGCTATCTTGCTGACAAAAGCAAGAGAACATAGCGTTGCCTTGGTAGGTCC  
AGCGGCGGAGGAACCTTTTGATCCGTTCTTGAACAGGATCTATTTGAGGCGCTAAATGAAACCTTAACG  
CTATGGAACCTCGCCGCCGACTGGGCTGGCGATGAGCGAAATGTAGTGCTTACGTTGTCCCGCATTTGGT  
ACAGCGCAGTAACCGGCAAAATCGCGCCGAAGGATGTCGCTGCCGACTGGGCAATGGAGCGCTGCCGGC  
CCAGTATCAGCCCGTCATACTTGAAGCTAGACAGGCTTATCTTGACAAAGAAGAAGATCGCTTGGCCTCG  
CGCGCAGATCAGTTGGAAGAATTTGTCCACTACGTGAAAGGCGAGATCACCAAGGTAGTCGGCAAATAAT  
GTCTAGCTAGAAATTCGTTCAAGCCGACGCCGCTTCGCCGGCGTTAACTCAAGCGATTAGATGCACTAAG  
CACATAATTGCTCACAGCCAACTATCAGGTCAAGTCTGCTTTTATTATTTTAAAGCGTGATAATAAGC  
CCTACACAAATTGGGAGATATATCATGCATGACCAAAATCCCTTAACGTGAGTTTTCGTTCCTACTGAGCG  
TCAGACCCCGTAGAAAAGATCAAAGGATCTTCTTGAGATCCTTTTTTTCTGCGCGTAATCTGCTGCTTGC  
AAACAAAAAAACCACCGCTACCAGCGGTGGTTTGTGTTGCCGGATCAAGAGCTACCAACTCTTTTTCCGAA  
GGTAACTGGCTTCAGCAGAGCGCAGATACCAAATACTGTCTTCTAGTGTAGCCGTAGTTAGGCCACCAC  
TTCAAGAACTCTGTAGCACCAGCTACATACCTCGCTCTGCTAATCCTGTTACCAGTGGCTGCTGCCAGTG  
GCGATAAGTCGTGCTTTACCGGGTTGGACTCAAGACGATAGTTACCGGATAAGGCGCAGCGGTGCGGCTG  
AACGGGGGGTTGCTGCACACAGCCCAGCTTGGAGCGAACGACCTACACCGAACTGAGATACCTACAGCGT  
GAGCTATGAGAAAGCGCCACGCTTCCCGAAGGGAGAAAGGCGGACAGGTATCCGGTAAGCGGCAGGGTCG  
GAACAGGAGAGCGCACGAGGGAGCTTCCAGGGGAAACGCTTGGTATCTTTATAGTCCTGTCGGGTTTTCG  
CCACCTCTGACTTGAGCGTCGATTTTTGTGATGCTCGTCAGGGGGCGGAGCCTATGGAAAAACGCCAGC  
AACGCGGCCTTTTTACGGTTTCTGGCCTTTTGCTGGCCTTTTGCTCACATGTTCTTTCTGCGTTATCCC  
CTGATTCTGTGGATAACCGTATTACCGCCTTTGAGTGAGCTGATACCGCTCGCCGCAGCCGAACGACCGA  
GCGCAGCGAGTCAGTGAGCGAGGAAGCGGAAGAGCGCCTGATGCGGTATTTCTCCTTACGCATCTGTGC  
GGTATTTACACCCGCATATGGTGCACCTCAGTACAATCTGCTCTGATGCCGCATAGTTAAGCCAGTATA  
CACTCCGCTATCGCTACGTGACTGGGTGATGGCTGCGCCCCGACACCCGCCAACACCCGCTGACGCGCCC  
TGACGGGCTTGTCTGCTCCCGGCATCCGCTTACAGACAAGCTGTGACCGTCTCCGGGAGCTGCATGTGTC  
AGAGGTTTTACCGTCATCACCGAAACGCGCGAGGCAGGGTGCTTGATGTGGGCGCCGGCGGTGAGTG  
GCGACGGCGCGGCTTGTCGCGCCCTGGTAGATTGCCGGCCGTAGGCCAGCCATTTTTGAGCGGCCAGC  
GGCCGCGATAGGCCGACGCGAAGCGCGGGGCGTAGGGAGCGCAGCGACCGAAGGGTAGGCGCTTTTTGC  
AGCTCTTCGGCTGTGCGCTGGCCAGACAGTTATGCACAGGCCAGGCGGGTTTTAAGAGTTTTAATAAGTT  
TTAAAGAGTTTTAGGCGGAAAAATCGCCTTTTTTCTCTTTTATATCAGTCACTTACATGTGTGACCGGTT  
CCCAATGTACGGCTTTGGGTTCCCAATGTACGGGTTCCGTTCCCAATGTACGGCTTTGGGTTCCCAATG  
TACGTGCTATCCACAGGAAAGAGACCTTTTCGACCTTTTCCCCTGCTAGGGCAATTTGCCCTAGCATCT  
GCTCCGTACATTAGGAACCGGCGGATGCTTCGCCCTCGATCAGGTTGCGGTAGCGCATGACTAGGATCGG  
GCCAGCCTGCCCCGCTCCTCCTTCAAATCGTACTCCGGCAGGTCAATTTGACCCGATCAGCTTGCGCACG  
GTGAAACAGAACTTCTTGAACCTCTCCGGCGCTGCCACTGCGTTCGTAGATCGTCTTGAACAACCATCTGG  
CTTCTGCCTTGCTGCGGCGCGGCTGCCAGGCGGTAGAGAAAACGGCCGATGCCGGGATCGATCAAAAA  
GTAATCGGGGTGAACCGTCAGCACGTCCGGGTTCTTGCTTCTGTGATCTCGCGGTACATCCAATCAGCT

AGCTCGATCTCGATGTACTCCGGCCGCCCGGTTTCGCTCTTTACGATCTTGTAGCGGCTAATCAAGGCTT  
CACCTCGGATACCGTCACCAGGCGGCCGTTCTTGGCCTTCTTCGTACGCTGCATGGCAACGTGCGTGGT  
GTTTAACCGAATGCAGGTTTCTACCAGGTCGTCTTTCTGCTTTCCGCCATCGGCTCGCCGGCAGAACTTG  
AGTACGTCCGCAACGTGTGGACGGAACACGCGGCCGGGCTTGTCTCCCTTCCCTTCCCGGTATCGGTTCA  
TGGATTGCGTTAGATGGGAAACGCCATCAGTACCAGGTCGTAATCCACACACTGGCCATGCCGGCCGG  
CCCTGCGGAAACCTCTACGTGCCCCGTCTGGAAGCTCGTAGCGGATCACCTCGCCAGCTCGTCGGTCACGC  
TTCGACAGACGGAACCGGCCACGTCCATGATGCTGCGACTATCGCGGGTGGCCACGTCATAGAGCATCG  
GAACGAAAAAATCTGGTTGCTCGTCGCCCTTGGGCGGCTTCCTAATCGACGGCGCACCGGCTGCCGGCGG  
TTGCCGGGATTCTTTGCGGATTCGATCAGCGGCCGCTTGCCACGATTACCGGGGCGTGCTTCTGCCTCG  
ATGCGTTGCCGCTGGGCGGCTGCGCGGCTTCAACTTCTCCACCAGGTCATCACCCAGCGCCGCGCCGA  
TTTGTACCGGGCCGGATGGTTTGCGACCGTCACGCCGATTCTCGGGCTTGGGGGTTCAGTGCCATTGC  
AGGGCCGGCAGACAACCCAGCCGCTTACGCCTGGCCAACCGCCGTTCTCCACACATGGGGCATTCCAC  
GGCGTCGGTGCCCTGGTTGTTCTTGATTTTCCATGCCGCCTCCTTTAGCCGCTAAAATTCATCTACTCATT  
TATTCAATTGCTCATTTACTCTGGTAGCTGCGCGATGTATTAGATAGCAGCTCGGTAATGGTCTTGCCCT  
TGGCGTACCGCGTACATCTTCAGCTTGGTGTGATCCTCCGCCGCAACTGAAAGTTGACCCGCTTCATGG  
CTGGCGTGTCTGCCAGGCTGGCCAACGTTGCAGCCTTGCTGCTGCGTGCCTCGGACGGCCGGCACTTAG  
CGTGTTTGTGCTTTTGTCTATTTTCTCTTTACCTCATTAACCTCAAATGAGTTTGTATTTAATTTACGCGG  
CCAGCGCTTGGACCTCGCGGGCAGCGTCGCCCTCGGGTTCTGATTCAAGAACGGTTGTGCCGGCGGGCGG  
AGTGCCTGGGTAGCTCACGCGCTGCGTGATACGGGACTCAAGAATGGGCAGCTCGTACCCGGCCAGCGCC  
TCGGCAACCTCACCGCCGATGCGCGTGCCCTTTGATCGCCCGCGACACGACAAAGGCCGCTTGTAGCCTTC  
CATCCGTGACCTCAATGCGCTGCTTAACCAGCTCCACCAGGTGCGCGGTGGCCCATATGTCGTAAGGGCT  
TGGCTGCACCGGAATCAGCACGAAGTCGGCTGCCTTGATCGCGGACACAGCCAAGTCCGCCGCTTGGGGC  
GCTCCGTGCGATCACTACGAAGTCGCGCCGGCCGATGGCCTTCACGTGCGGGTCAATCGTCGGGCGGTGCA  
TGCCGACAACGGTTAGCGGTTGATCTTCCCGCACGGCCGCCAATCGCGGGCACTGCCCTGGGGATCGGA  
ATCGACTAACAGAACATCGGCCCCGGCGAGTTGCAGGGCGCGGGCTAGATGGGTTGCGATGGTCTGCTTG  
CCTGACCCGCCTTTCTGGTTAAGTACAGCGATAACCTTCATGCGTTCCCTTGCGTATTTGTTTATTTAC  
TCATCGCATCATATACGACGACCGCATGACGCAAGCTGTTTTACTCAAATACACATCACCTTTTTTAGA  
CGGCGGCGCTCGGTTTCTTCAGCGGCCAAGCTGGCCGGCCAGGCCGCCAGCTTGGCATCAGACAAACCGG  
CCAGGATTTTCATGCAGCCGCACGTTGAGACGTGCGCGGGCGGCTCGAACACGTACCCGGCCGCGATCAT  
CTCCGCCTCGATCTCTTCGGTAATGAAAAACGGTTGCTCCTGGCCGTCCTGGTGCGGTTTCATGCTTGTT  
CCTCTTGGCGTTCAATCTCGGCGGCCGCCAGGGCGTCGGCTCGGTCAATGCGTCTCACGGAAGGCACC  
GCGCCGCTTGGCCTCGGTGGGCGTCACTTCCTCGCTGCGCTCAAGTGCAGGTCAGGGTCGAGCGATGC  
ACGCCAAGCAGTGCAGCCGCTCTTTACGGTGCGGCCCTTCCTGGTCGATCAGCTCGCGGGCGTGCGCGA  
TCTGTGCCGGGGTAGGGTAGGGCGGGGCCAAACTTCACGCCTCGGGCCTTGGCGGCTCGCGCCCGCT  
CCGGGTGCGGTGATGATTAGGGAACGCTCGAACTCGGCAATGCCGGCGAACACGGTCAACACCATGCGG  
CCGGCCGGCGTGGTGGTGTGCGGCCACGGCTCTGCCAGGCTACGCAGGCCCCGCGCGGCCCTCCTGGATGC  
GCTCGGCAATGTCCAGTAGGTGCGGGTGCTGCGGGCCAGGCGGTCTAGCCTGGTCACTGTCACAACGTC  
GCCAGGGCGTAGGTGGTCAAGCATCCTGGCCAGCTCCGGGCGGTGCGGCCTGGTGCCGGTGATCTTCTCG  
GAAACAGCTTGGTGCAGCCGGCCGCGTGACGTTTCGGCCGTTGGTTGGTCAAGTCTGGTCGTCGGTGC  
TGACGCGGGCATAGCCAGCAGGCCAGCGGCGGCGCTCTTGTTTCATGGCGTAATGTCTCCGGTTCTAGTC  
GCAAGTATTCTACTTTATGCGACTAAAACACGCGACAAGAAAACGCCAGGAAAAGGGCAGGGCGGCAGCC  
TGTCGCGTAACCTTAGGACTTGTGCGACATGTGCTTTTCAAGAAGCGCTGCACTGAACGTGAGAAGCCGA  
CTGCACTATAGCAGCGGAGGGGTGGATCAAAGTACTTTGATCCCGAGGGGAACCTGTGGTTGGCATGC  
ACATACAAATGGACGAACGGATAAACCTTTTCACGCCCTTTTAAATATCCGTTATTCTAATAAACGCTCT



TTTCTCTTAGGTTTACCCGCCAATATATCCTGTCAAACACTGATAGTTTAAACTGAAGCGGGAAACGAC  
AATCTGATCCAAGCTCAAGCTAAGCTTGAGCTCTGCATGCCTGCAGGTCCCCAGATTAGCCTTTTCAATT  
TCAGAAAGAATGCTAACCCACAGATGGTTAGAGAGGCTTACGCAGCAGGTCTCATCAAGACGATCTACCC  
GAGCAATAATCTCCAGGAAATCAAATACCTTCCCAAGAAGGTTAAAGATGCAGTCAAAAGATTGAGGACT  
AACTGCATCAAGAACACAGAGAAAGATATATTTCTCAAGATCAGAAGTACTATTCCAGTATGGACGATT  
AAGGCTTGCTTCACAAACCAAGGCAAGTAATAGAGATTGGAGTCTCTAAAAAGGTAGTTCCCACTGAATC  
AAAGGCCATGGAGTCAAAGATTCAAATAGAGGACCTAACAGAACTCGCCGTAAAGACTGGCGAACAGTTC  
ATACAGAGTCTCTTACGACTCAATGACAAGAAGAAAATCTTCGTCAACATGGTGAGCACGACACACTTG  
TCTACTCCAAAAATATCAAAGATACAGTCTCAGAAGACCAAAGGGCAATTGAGACTTTTCAACAAAGGGT  
AATATCCGGAAACCTCCTCGGATTCCATTGCCAGCTATCTGTCACTTTATTGTGAAGATAGTGAAAAAG  
GAAGGTGGCTCCTACAAATGCCATCATTGCGATAAAGGAAAGGCCATCGTTGAAGATGCCCTGCGCGACA  
GTGGTCCCAAAGATGGACCCCCACCCACGAGGAGCATCGTGAAAAAGAAGACGTTCCAACCACGTCTTC  
AAAGCAAGTGGATTGATGTGATATCTCCACTGACGTAAGGGATGACGCACAATCCCACTATCCTTCGCAA  
GACCTTCTCTATATAAGGAAGTTCATTTCAATTTGGAGAGAACACGGGGGACTCTAGAGGATCCAAGGA  
GATATAAGCCGCCACCATGGATTACAAGGACGATGATGACAAGGACTACAAGGACGATGACGATAAGGAC  
TATAAGGATGACGATGACAAGGATTACGCCGAGGATGGATGATACTAGCGGACAACTTTTCGTTTCTGTG  
AACCTTTCTGACGAAAGCAACACGGCAAGCACTAAAGTTGAAAACGTAAAATCGGAAGCGGATCGCTTGG  
AGTTTTTACGTAAAATGAATCCCTTTATTGTTGACGCTCTGGTGCGGAAAACCAATTATCAGGGTGCTCG  
CTTTCGCGCAAGAATAATAGGAGTGTGCGTGGATTGTGGTAGAAAACACGACAAGGCGCTCAAGACTGAA  
CGTAAGTGTAAGGTCAACAACACGCAATCTCAGAACGAGGTGGCGCATATGTTGATGCACGATCCCGTTA  
AGTATTTGAACAAAAGAAAGGCTAGAGCCTTTTCTAACGCAGAGATGTTTGCGATTGAACTGGTTTCGTA  
CACCAAGGAAAGGCAATTGGCGGTGATTTAGCCGCTGAAAGGGAGAAGACGAGACTGGCTCGTAGACAC  
CCAATACGTTCTCCGGAAGAAACTCCGGAACATTATAAAGCGGCGATGACTGCTAAGGCAATGTTACCGG  
ACATCAACGCCGTAGACGTTGGTGATAACGAGGAACTTCGTGCGAGTACCCAGTGAGTCTGAGTGTTC  
TGGCGGAGTTCTCCGTGAACACCCTTCATCTGACCTAATGATATCCCGCGGCCATGCTAGAGTCCGCAA  
AAATCACCAGTCTCTCTCTACAAATCTATCTCTCTATTTTTCTCCAGAATAATGTGTGAGTAGTTCCT  
AGATAAGGGAATTAGGGTTCTTATAGGGTTTCGCTCATGTGTTGAGCATATAAGAAACCCTTAGTATGTA  
TTTGTATTTGTAAAATACTTCTATCAATAAAATTTCTAATTCCTAAAACCAAATCCAGTGACCTGCAGG  
CATGCGACGTCG

### Sequence of pH7LIC3.1.1-p23M17 (35S- p23M17)

GGGTACCCTCGAATTATCATACATGAGAATTAAGGGAGTCACGTTATGACCCCGCCGATGACGCGGGACA  
AGCCGTTTTACGTTTGGAAGTACAGAACCGCAACGTTGAAGGAGCCACTGAGCCGCGGGTTTCTGGAGT  
TTAATGAGCTAAGCACATACGTCAGAAACCATTATTGCGCGTTCAAAAGTCGCCTAAGGTCATATCAGC  
TAGCAAATATTTCTTGTCAAAAATGCTCCACTGACGTTCCATAAATTCCCTCGGTATCCAATTAGAGTC  
TCATATTTCACTCTCAACTCGAATCCCCCTATGAAAAAGCCTGAACTCACCGCGACGTCTGTGAGAAAGT  
TTCTGATCGAAAAGTTCGACAGCGTCTCCGACCTGATGCAGCTCTCGGAGGGCGAAGAATCTCGTGCTTT  
CAGCTTCGATGTAGGAGGGCGTGATATGTCTGCGGGTAAATAGCTGCGCCGATGGTTTCTACAAAGAT  
CGTTATGTTTATCGGCACTTTGCATCGGCCGCGCTCCCGATTCCGGAAGTGCTTGACATTGGGGAGTTCA  
GCGAGAGCCTGACCTATTGCATCTCCCGCCGTGCACAGGGTGTACGTTGCAAGACCTGCCTGAAACCGA  
ACTGCCGCTGTTCTTCAGCCGGTCGCGGAGGCTATGGATGCTATCGTGCGGCCGATCTTAGCCAGACG  
AGCGGGTTCGGCCCATTCGGACCGCAAGGAATCGGTCAATACACTACATGGCGTGATTTCATATGCGCGA  
TTGCTGATCCCCATGTGTATCACTGGCAAACGTGTGATGGACGACACCGTCAGTGCGTCCGTGCGCGAGGC  
TCTCGATGAGCTGATGCTTTGGGCGAGGACTGCCCCGAAGTCCGGCACTCGTGACGCGGATTTCGGCTCC

AACAATGTCCTGACGGACAATGGCCGCATAACAGCGGTCATTGACTGGAGCGAGGCGATGTTCTGGGGATT  
CCCAATACGAGGTCGCCAACATCTTCTTCTGGAGGCCGTGGTTGGCTTGATGGAGCAGCAGACGCGCTA  
CTTCGAGCGGAGGCATCCGGAGCTTGCAGGATCGCCAAGGCTCCGGGCGTATATGCTCCGCATTGGTCTT  
GACCAACTCTATCAGAGCTTGGTTGACGGCAATTTTCGATGATGCAGCTTGGGCGCAGGGTCGATGCGACG  
CAATCGTCCGATCCGGAGCCGGGACTGTCTGGGCGTACACAAATCGCCCGCAGAAGCGCGGCCGTCTGGAC  
CGATGGCTGTGTAGAAGTACTCGCCGATAGTGGAAACCGACGCCCCAGCACTCGTCCGAGGGCAAAGGAA  
TAGAGTAGATGCCGACCGAACAAAGAGCTGATTTTCGAGAACGCCTCAGCCAGCAACTCGCGCGAGCCTAGC  
AAGGCAAATGCGAGAGAACGGCCTTACGCTTGGTGGCACAGTTCTCGTCCACAGTTCGCTAAGCTCGCTC  
GGCTGGGTCGCGGGAGGGCCGGTCGCAGTGATTTCAGGAATTAATTCCCTAGAGTCAAGCAGATCGTTCAA  
ACATTTGGCAATAAAGTTTCTTAAGATTGAATCCTGTTGCCGGTCTTGCGATGATTATCATATAATTTCT  
GTTGAATTACGTTAAGCATGTAATAATTAACATGTAATGCATGACGTTATTTATGAGATGGGTTTTTATG  
ATTAGAGTCCCGCAATTATACATTTAATACGCGATAGAAAACAAAATATAGCGCGCAAACTAGGATAAAT  
TATCGCGCGCGGTGTCTATGTTACTAGATCGACCGGCATGCAAGCTGATAATTCATTTCGGCGTTAA  
TTCAGTACATTAAAAACGTCCGCAATGTGTTATTAAGTTGTCTAAGCGTCAATTTGTTTACACCACAATA  
TATCCTGCCACCAGCCAGCCAACAGCTCCCCGACCGGCAGCTCGGCACAAAATCACCACCTCGATACAGGC  
AGCCCATCAGTCCGGGACGGCGTCAGCGGGAGAGCCGTTGTAAGGCGGCAGACTTTGCTCATGTTACCGA  
TGCTATTCCGAAGAACGGCAACTAAGCTGCCGGGTTTGAACACGGATGATCTCGCGGAGGGTAGCATGT  
TGATTGTAACGATGACAGAGCGTTGCTGCCTGTGATCAATTTCGGGCACGAACCCAGTGGACATAAGCCTC  
GTTCCGGTTCGTAAGCTGTAATGCAAGTAGCGTAACTGCCGTCACGCAACTGGTCCAGAACCTTGACCGAA  
CGCAGCGGTGGTAACGGCGCAGTGGCGGTTTTTCATGGCTTCTTGTTATGACATGTTTTTTTGGGGTACAG  
TCTATGCCTCGGGCATCCAAGCAGCAAGCGCGTTACGCCGTGGGTCGATGTTTGATGTTATGGAGCAGCA  
ACGATGTTACGCAGCAGGGCAGTCGCCCTAAAACAAAGTTAAACATCATGGGGGAAGCGGTGATCGCCGA  
AGTATCGACTCAACTATCAGAGGTAGTTGGCGTCATCGAGCGCCATCTCGAACCGACGTTGCTGGCCGTA  
CATTTGTACGGCTCCGCAGTGGATGGCGGCCTGAAGCCACACAGTGATATTGATTTGCTGGTTACGGTGA  
CCGTAAGGCTTGATGAAACAACGCGCGAGCTTTGATCAACGACCTTTTGAAACTTCGGCTTCCCTTG  
AGAGAGCGAGATTCTCCGCGCTGTAGAAGTACCATTGTTGTGCACGACGACATCATTCCTGGCGTTAT  
CCAGCTAAGCGCGAACTGCAATTTGGAGAATGGCAGCGCAATGACATTCTTGAGGTATCTTCGAGCCAG  
CCACGATCGACATTGATCTGGCTATCTTGCTGACAAAAGCAAGAGAACATAGCGTTGCCTTGGTAGGTCC  
AGCGGCGGAGGAACCTTTTGATCCGTTCTCTGAACAGGATCTATTTGAGGCGCTAAATGAAACCTTAACG  
CTATGGAACCTCGCCGCCGACTGGGCTGGCGATGAGCGAAATGTAGTGCTTACGTTGTCCCGCATTTGGT  
ACAGCGCAGTAACCGGCAAAATCGCGCCGAAGGATGTCGCTGCCGACTGGGCAATGGAGCGCCTGCCGGC  
CCAGTATCAGCCCGTCATACTTGAAGCTAGACAGGCTTATCTTGACAGAAGAAGATCGCTTGGCCTCG  
CGCGCAGATCAGTTGGAAGAATTTGTCCACTACGTGAAAGGCGAGATCACCAAGGTAGTCGGCAAATAAT  
GTCTAGCTAGAAATTCGTTCAAGCCGACGCCGCTTCGCCGGCGTTAACTCAAGCGATTAGATGCACTAAG  
CACATAATTGCTCACAGCCAAACTATCAGGTCAAGTCTGCTTTTATTATTTTTTAAGCGTGCATAATAAGC  
CCTACACAAATTGGGAGATATATCATGCATGACCAAAATCCCTTAACGTGAGTTTTTCGTTCCACTGAGCG  
TCAGACCCCGTAGAAAAGATCAAAGGATCTTCTTGAGATCCTTTTTTTCTGCGCGTAATCTGCTGCTTGC  
AAACAAAAAAACCACCGCTACCAGCGGTGGTTTGTGTTGCCGGATCAAGAGCTACCAACTCTTTTTCCGAA  
GGTAACTGGCTTCAGCAGAGCGCAGATACCAAATACTGTCTTCTAGTGTAGCCGTAGTTAGGCCACCAC  
TTCAAGAACTCTGTAGCACCAGCTACATACCTCGCTCTGCTAATCCTGTTACAGTGGCTGCTGCCAGTG  
GCGATAAGTCGTGTCTTACCGGGTTGGACTCAAGACGATAGTTACCGGATAAGGCGCAGCGGTGCGGCTG  
AACGGGGGGTTCTGTGCACACAGCCAGCTTGGAGCGAACGACCTACACCGAACTGAGATACCTACAGCGT  
GAGCTATGAGAAAGCGCCACGCTTCCCGAAGGGAGAAAGGCGGACAGGTATCCGGTAAGCGGCAGGGTCG  
GAACAGGAGAGCGCACGAGGGAGCTTCCAGGGGAAACGCCTGGTATCTTTATAGTCTGTGCGGTTTTCG

CCACCTCTGACTTGAGCGTCGATTTTTGTGATGCTCGTCAGGGGGGCGGAGCCTATGGAAAAACGCCAGC  
AACCGGCGCTTTTTACGGTTCCTGGCCTTTTGCTGGCCTTTTGCTCACATGTTCTTTCTGCGTTATCCC  
CTGATTCTGTGGATAACCGTATTACCGCCTTTGAGTGAGCTGATACCGCTCGCCGCAGCCGAACGACCGA  
GCGCAGCGAGTCAGTGAGCGAGGAAGCGGAAGAGCGCCTGATGCGGTATTTTCTCCTTACGCATCTGTGC  
GGTATTTACACCCGCATATGGTGCACCTCAGTACAATCTGCTCTGATGCCGCATAGTTAAGCCAGTATA  
CACTCCGCTATCGCTACGTGACTGGGTTCATGGCTGCGCCCCGACACCCGCCAACACCCGCTGACGCGCCC  
TGACGGGCTTGTCTGCTCCCGGCATCCGCTTACAGACAAGCTGTGACCGTCTCCGGGAGCTGCATGTGTC  
AGAGGTTTTACCGTCATCACCGAAACGCGGAGGCAGGGTGCCTTGATGTGGGCGCCGGCGGTGAGTG  
GCGACGGCGCGGCTTGTCCGCGCCCTGGTAGATTGCCTGGCCGTAGGCCAGCCATTTTTGAGCGGCCAGC  
GGCCGCGATAGGCCGACGCGAAGCGCGGGGCGTAGGGAGCGCAGCGACCGAAGGTTAGGCGCTTTTTGC  
AGCTCTTCGGCTGTGCGCTGGCCAGACAGTTATGCACAGGCCAGGCGGGTTTTAAGAGTTTTAATAAGTT  
TTAAAGAGTTTTAGGCGGAAAAATCGCCTTTTTTCTCTTTTATATCAGTCACTTACATGTGTGACCGGTT  
CCCAATGTACGGCTTTGGGTTCCTAATGTACGGGTTCGGGTTCCTAATGTACGGCTTTGGGTTCCTAATG  
TACGTGCTATCCACAGGAAAGAGACCTTTTCGACCTTTTCCCCTGCTAGGGCAATTTGCCCTAGCATCT  
GCTCCGTACATTAGGAACCGGCGGATGCTTCGCCCTCGATCAGGTTGCGGTAGCGCATGACTAGGATCGG  
GCCAGCCTGCCCCGCTCCTCCTTCAAATCGTACTCCGGCAGGTCAATTTGACCCGATCAGCTTGCGCACG  
GTGAAACAGAAGTTCTTGAAGTCTCCGGCGCTGCCACTGCGTTCGTAGATCGTCTTGAACAACCATCTGG  
CTTCTGCCTTGCTGCGGCGCGGCGTGCCAGGCGGTAGAGAAAACGGCCGATGCCGGGATCGATCAAAAA  
GTAATCGGGGTGAACCGTCAGCACGTCCGGGTCTTGCCTTCTGTGATCTCGCGGTACATCCAATCAGCT  
AGCTCGATCTCGATGTACTCCGGCCGCCGGTTTTCGCTCTTTACGATCTTGTAGCGGCTAATCAAGGCTT  
CACCTCGGATACCGTCACCGAGGCGGCCGTTCTTGCCCTTCTTCGTACGCTGCATGGCAACGTGCGTGGT  
GTTTAACCGAATGCAGGTTTCTACCAGGTGCTCTTCTGCTTTCCGCCATCGGCTCGCCGGCAGAACTTG  
AGTACGTCCGCAACGTGTGGACGGAACACGCGGCCGGGCTTGTCTCCCTTCCCTTCCCGGTATCGGTTCA  
TGGATTTCGGTTAGATGGGAAACGCCATCAGTACCAGGTCGTAATCCACACACTGGCCATGCCGGCCGG  
CCCTGCGGAAACCTCTACGTGCCCCTGCTGGAAGCTCGTAGCGGATCACCTCGCCAGCTCGTCGGTCACGC  
TTCGACAGACGGAACCGCCACGTCCATGATGCTGCGACTATCGCGGGTGCCACGTCATAGAGCATCG  
GAACGAAAAAATCTGGTTGCTCGTCGCCCTTGGGCGGCTTCCTAATCGACGGCGCACCGGCTGCCGGCGG  
TTGCCGGGATTCTTTGCGGATTGATCAGCGGCCGCTTGCCACGATTACCGGGGCGTGCTTCTGCCTCG  
ATGCGTTGCCGCTGGGCGGCCGTGCGCGGCCCTTCAACTTCTCCACCAGGTCATCACCCAGCGCCGCGCGA  
TTTGTACCGGGCCGGATGGTTTGCGACCGTCACGCCGATTCCCTCGGGCTTGGGGGTTCCAGTGCCATTGC  
AGGGCCGGCAGACAACCCAGCCGCTTACGCCTGGCCAACCGCCGTTCCCTCCACACATGGGGCATTCCAC  
GGCGTCGGTGCCCTGGTTGTTCTTGATTTCCATGCCGCCTCCTTTAGCCGCTAAAATTCATCTACTCATT  
TATTCATTTGCTCATTTACTCTGGTAGCTGCGCGATGTATTAGATAGCAGCTCGGTAATGGTCTTGCCCT  
TGGCGTACCGCGTACATCTCAGCTTGGTGTGATCCTCCGCCGGCAACTGAAAGTTGACCCGCTTCATGG  
CTGGCGTGTCTGCCAGGCTGGCCAACGTTGCAGCCTTGCTGCTGCGTGCGCTCGGACGGCCGGCACTTAG  
CGTGTTTTGTGCTTTTGCTCATTTTCTCTTTACCTCATTAACCAAATGAGTTTTGATTTAATTTAGCGG  
CCAGCGCTGGACCTCGCGGGCAGCGTCGCCCTCGGGTTCTGATTCAAGAACGGTTGTGCCGGCGGCGGC  
AGTGCCTGGGTAGCTCAGCGCTGCGTGATACGGGACTCAAGAATGGGCAGCTCGTACCCGGCCAGCGCC  
TCGGCAACCTCACCGCCGATGCGCGTGCCCTTTGATCGCCCGCGACACGACAAAGGCCGCTTGATAGCCTTC  
CATCCGTGACCTCAATGCGCTGCTTAACCAGCTCCACCAGGTGCGCGGTGGCCCATATGTCGTAAGGGCT  
TGGCTGCACCGGAATCAGCACGAAGTCGGCTGCCTTGATCGCGGACACAGCCAAGTCCGCCGCTGGGGC  
GCTCCGTGCGATCACTACGAAGTCGCGCCGGCCGATGGCCTTCACGTGCGGGTCAATCGTCGGGCGGTGCA  
TGCCGACAACGGTTAGCGGTGATCTTCCCGCACGGCCGCCAATCGCGGGCACTGCCCTGGGGATCGGA  
ATCGACTAACAGAACATCGGCCCCGGCGAGTTGCAGGGCGGGGCTAGATGGGTTGCGATGGTCTGTTG

CCTGACCCGCCTTTCTGGTTAAGTACAGCGATAACCTTCATGCGTTCCCCTTGCGTATTTGTTTATTTAC  
TCATCGCATCATATACGCAGCGACCGCATGACGCAAGCTGTTTTACTCAAATACACATCACCTTTTTAGA  
CGGCGGCGCTCGGTTTCTTCAGCGGCCAAGCTGGCCGGCCAGGCCGCCAGCTTGGCATCAGACAAACCGG  
CCAGGATTTTCATGCAGCCGCACGGTTGAGACGTGCGCGGGCGGCTCGAACACGTACCCGGCCGCGATCAT  
CTCCGCCTCGATCTCTTCGGTAATGAAAAACGGTTTCGTCTTGCCGTCTGGTGCGTTTCATGCTTGTT  
CCTCTTGCGTTTCATTTCTGGCGGCCGCCAGGGCGTTCGGCTCGGTCAATGCGTCTCACGGAAGGCACC  
GCGCCGCCTGGCCTCGGTGGGCGTCACTTCCTCGCTGCGCTCAAGTGC GCGGTACAGGGTCGAGCGATGC  
ACGCCAAGCAGTGCAGCCGCCTCTTTCACGGTGCGGCCTTCCTGGTCGATCAGCTCGCGGGCGTGCGCGA  
TCTGTGCCGGGGTGAGGGTAGGGCGGGGGCCAAACTTCACGCCTCGGGCCTTGGCGGCCTCGCGCCCGCT  
CCGGGTGCGGTTCGATGATTAGGGAACGCTCGAACTCGGCAATGCCGGCGAACACGGTCAACACCATGCGG  
CCGGCCGGCGTGGTGGTGTCGGCCCACGGCTCTGCCAGGCTACGCAGGCCCGCGCCGGCCTCTGGATGC  
GCTCGGCAATGTCCAGTAGGTGCGGGTGCTGCGGGCCAGGCGGTCTAGCCTGGTCACTGTCAACACGTC  
GCCAGGGCGTAGGTGGTCAAGCATCCTGGCCAGCTCCGGGCGGTGCGGCCTGGTGCCGGTGATCTTCTCG  
GAAACAGCTTGGTGACGCCGGCCGCGTGACAGTTCGGCCCGTTGGTTGGTCAAGTCTGGTCGTGCGGTGC  
TGACGCGGGCATAGCCAGCAGGCCAGCGCGGCGCTCTTGTTTCATGGCGTAATGTCTCCGGTTCTAGTC  
GCAAGTATTTCTACTTTATGCGACTAAAACACGCGACAAGAAAACGCCAGGAAAAGGGCAGGGCGGCAGCC  
TGTCGCGTAACCTTAGGACTTGTGCGACATGTGTTTTTCAGAAGACGGCTGCACTGAACGTGAGAAGCCGA  
CTGCACTATAGCAGCGGAGGGTTGGATCAAAGTACTTTGATCCCGAGGGGAACCCTGTGGTTGGCATGC  
ACATACAAATGGACGAACGGATAAACCTTTTCACGCCCTTTTAAATATCCGTTATTCTAATAAACGCTCT  
TTTCTCTTAGGTTTACCCGCCAATATATCCTGTCAAACACTGATAGTTTAAACTGAAGCGGGAAACGAC  
AATCTGATCCAAGCTCAAGCTAAGCTTGAGCTCTGCATGCCTGCAGGTCCCAGATTAGCCTTTTCAATT  
TCAGAAAGAATGCTAACCACAGATGGTTAGAGAGGCTTACGCAGCAGGTCTCATCAAGACGATCTACCC  
GAGCAATAATCTCCAGGAAATCAAATACCTTCCCAAGAAGGTTAAAGATGCAGTCAAAAGATTGAGACT  
AACTGCATCAAGAACACAGAGAAAGATATATTTCTCAAGATCAGAAGTACTATTCCAGTATGGACGATTC  
AAGGCTTGCTTCACAAACCAAGGCAAGTAATAGAGATTGGAGTCTCTAAAAAGGTAGTTCCCACTGAATC  
AAAGGCCATGGAGTCAAAGATTCAAATAGAGGACCTAACAGAACTCGCCGTAAAGACTGGCGAACAGTTC  
ATACAGAGTCTCTTACGACTCAATGACAAGAAGAAAATCTTCGTCAACATGGTGAGACGACACACTTG  
TCTACTCCAAAAATATCAAAGATACGTCTCAGAAGACCAAAGGGCAATTGAGACTTTTCAACAAAGGGT  
AATATCCGAAACCTCCTCGGATTCCATTGCCCAGCTATCTGTCACTTTATTGTGAAGATAGTGGAAAAG  
GAAGGTGGCTCCTACAAATGCCATCATTGCGATAAAGGAAAGGCCATCGTTGAAGATGCCTCTGCCGACA  
GTGGTCCCAAAGATGGACCCCCACCCACGAGGAGCATCGTGAAAAAGAAGACGTTCCAACCACGTCTTC  
AAAGCAAGTGGATTGATGTGATATCTCCACTGACGTAAGGGATGACGCACAATCCCACTATCCTTCGCAA  
GACCTTCCCTCTATATAAGGAAGTTCATTTTCATTTGGAGAGAACACGGGGGACTCTAGAGGATCCAAGGA  
GATATAAGCCGCCACCATGGATTACAAGGACGATGATGACAAGGACTACAAGGACGATGACGATAAGGAC  
TATAAGGATGACGATGACAAGGATTACGCCGAGGATGGATGATACTAGCGGACAACTTTCGTTTTCTGTG  
AACCTTTCTGACGAAAGCAACACGGCAAGCACTAAAGTTGAAAACGTAAAAATCGGAAGCGGATCGCTTGG  
AGTTTTTACGTAAAATGAATCCCTTTATGTGTGACGCTCTGGTGCGGAAAACCAATTATCAGGGTGCTCG  
CTTTCGCGCAAGAATAATAGGAGTGTGCGTGGATTGTGGTAGAAAACACGACAAGGCGCTCAAGACTGAA  
CGTAAGTGTAAGGTCAACAACACGCAATCTCAGAACGAGGTGGCGCATATGTTGATGCACGATCCCGTTA  
AGTATTTGAACAAAAGAAAGGCTAGAGCCTTTTCTAACGCAGAGATGTTTGCGATTGAACTGGTTTTCGTA  
CACCAAGGAAAGGCAATTGGCGGTGATTTAGCCGCTGAAAGGGAGAAGACGAGACTGGCTCGTAGACAC  
CCAATACGTTCTCCGGAAGAACTCCGGAACATTATAAATTCGGTATGACTGCTAAGGCAATGTTAGCGG  
ACATCAACGCCGTAGACGTTGGTGATAACGAGGAACTTCGTGCGAGTACCCAGTGAGTCTGAGTGTTTC  
TGGCGGAGTTCTCCGTGAACACCACTTCATCTGACCTAATGATATCCCGCGGCCATGCTAGAGTCCGCAA

AAATCACCAGTCTCTCTCTACAAATCTATCTCTCTATTTTTCTCCAGAATAATGTGTGAGTAGTTCCC  
AGATAAGGGAATTAGGGTTCTTATAGGGTTTCGCTCATGTGTTGAGCATATAAGAAACCCCTAGTATGTA  
TTTGTATTTGTAAAATACTTCTATCAATAAAATTTCTAATTCCTAAAACCAAATCCAGTGACCTGCAGG  
CATGCGACGTCG

### Sequence of pH7LIC3.1.1-p23M18 (35S- p23M18)

GGGTACCCCTCGAATTATCATACATGAGAATTAAGGGAGTCACGTTATGACCCCGCCGATGACGCGGGACA  
AGCCGTTTTACGTTTGGAAGTACAGAACCGCAACGTTGAAGGAGCCACTGAGCCGCGGGTTTCTGGAGT  
TTAATGAGCTAAGCACATACGTCAGAAACCATTATTGCGCGTTCAAAAGTCGCCTAAGGTCATATCAGC  
TAGCAAATATTTCTTGTCAAAAATGCTCCACTGACGTTCCATAAATTCCCCTCGGTATCCAATTAGAGTC  
TCATATTTACTCTCAACTCGAATCCCCCTATGAAAAAGCCTGAACTCACCGCGACGTCGTGAGAAAGT  
TTCTGATCGAAAAGTTCGACAGCGTCTCCGACCTGATGCAGCTCTCGGAGGGCGAAGAATCTCGTGCTTT  
CAGCTTCGATGTAGGAGGGCGTGGATATGTCTGCGGGTAAATAGCTGCGCCGATGGTTTCTACAAAGAT  
CGTTATGTTTATCGGCACTTTGCATCGGCCGCGCTCCCGATTCCGGAAGTGCTTGACATTGGGGAGTTCA  
GCGAGAGCCTGACCTATTGCATCTCCCGCCGTGCACAGGGTGTACGTTGCAAGACCTGCCTGAAACCGA  
ACTGCCCGCTGTTCTTCAGCCGGTCGCGGAGGCTATGGATGCTATCGCTGCGGCCGATCTTAGCCAGACG  
AGCGGGTTCGGCCCATTCGGACCGCAAGGAATCGGTCAATACACTACATGGCGTGATTTATATGCGCGA  
TTGCTGATCCCATGTGTATCACTGGCAAAGTGTGATGGACGACACCGTCAGTGCGTCCGTCGCGCAGGC  
TCTCGATGAGCTGATGCTTTGGGCGAGGACTGCCCCGAAGTCCGGCACTCGTGACGCGGATTTCGGCTCC  
AACAATGTCCTGACGGACAATGGCCGCATAACAGCGGTCAATTGACTGGAGCGAGGCGATGTTTCGGGGATT  
CCCAATACGAGGTCGCCAACATCTTCTTCTGGAGGCCGTGGTTGGCTTGATGGAGCAGCAGACGCGCTA  
CTTCGAGCGGAGGCATCCGGAGCTTGCAGGATCGCCAAGGCTCCGGGCGTATATGCTCCGCATTGGTCTT  
GACCAACTCTATCAGAGCTTGGTTGACGGCAATTTTCGATGATGCAGCTTGGGCGCAGGGTCGATGCGACG  
CAATCGTCCGATCCGGAGCCGGGACTGTGCGGCGTACACAAATCGCCCGCAGAAGCGCGGCCGTCTGGAC  
CGATGGCTGTGTAGAAGTACTCGCCGATAGTGAAACCGACGCCCCAGCACTCGTCCGAGGGCAAAGGAA  
TAGAGTAGATGCCGACCGAACAAGAGCTGATTTTCGAGAACGCCTCAGCCAGCAACTCGCGCGAGCCTAGC  
AAGGCAAATGCGAGAGAACGGCCTTACGCTTGGTGCCACAGTTCTCGTCCACAGTTCGCTAAGCTCGCTC  
GGCTGGGTGCGGGGAGGCCGGTTCGAGTGATTACAGGAATTAATTCCTAGAGTCAAGCAGATCGTTCAA  
ACATTTGGCAATAAAGTTTCTTAAGATTGAATCCTGTTGCCGGTCTTGCATGATTATCATATAATTTCT  
GTTGAATTACGTTAAGCATGTAATAATTAACATGTAATGCATGACGTTATTTATGAGATGGGTTTTTATG  
ATTAGAGTCCCGCAATTATACATTTAATACGCGATAGAAAACAAAATATAGCGCGCAAACCTAGGATAAAT  
TATCGCGCGCGGTGTATCTATGTTACTAGATCGACCGGCATGCAAGCTGATAATTCAATTCGGCGTTAA  
TTCAGTACATTAAAAACGTCCGCAATGTGTATTAAAGTTGTCTAAGCGTCAATTTGTTTACACCACAATA  
TATCCTGCCACCAGCCAGCCAACAGCTCCCCGACCGGCAGCTCGGCACAAAATCACCCTCGATACAGGC  
AGCCCATCAGTCCGGGACGGCGTCAGCGGGAGAGCCGTTGTAAGGCGGCAGACTTTGCTCATGTTACCGA  
TGCTATTTCGGAAGAACGGCAACTAAGCTGCCGGGTTTGAAACACGGATGATCTCGCGGAGGGTAGCATGT  
TGATTGTAACGATGACAGAGCGTTGCTGCCTGTGATCAATTCGGGCACGAACCCAGTGACATAAGCCTC  
GTTCCGTTTCGTAAGCTGTAATGCAAGTAGCGTAAGTCCGTCACGCAACTGGTCCAGAACCCTTGACCGAA  
CGCAGCGGTGGTAACGGCGCAGTGGCGGTTTTTCATGGCTTCTTGTTATGACATGTTTTTTTTGGGGTACAG  
TCTATGCCTCGGGCATCCAAGCAGCAAGCGCGTTACGCCGTGGGTGATGTTTGATGTTATGGAGCAGCA  
ACGATGTTACGCAGCAGGGCAGTCGCCCTAAAACAAAGTTAAACATCATGGGGGAAGCGGTGATCGCCGA  
AGTATCGACTCAACTATCAGAGGTAGTTGGCGTCATCGAGCGCCATCTCGAACCGACGTTGCTGGCCGTA  
CATTTGTACGGCTCCGCACTGGATGGCGGCCTGAAGCCACACAGTGATATTGATTTGCTGGTTACGGTGA  
CCGTAAGGCTTGATGAAACAACGCGCGAGCTTTGATCAACGACCTTTTGAAACTTCGGCTTCCCTGG

AGAGAGCGAGATTCTCCGCGCTGTAGAAGTCACCATTGTTGTGCACGACGACATCATTCGGTGGCGTTAT  
CCAGCTAAGCGCGAACTGCAATTTGGAGAATGGCAGCGCAATGACATTCTTGCAAGTATCTTCGAGCCAG  
CCACGATCGACATTGATCTGGCTATCTTGCTGACAAAAGCAAGAGAACATAGCGTTGCCTTGGTAGGTCC  
AGCGGCGGAGGAACCTTTTGATCCGGTTCCTGAACAGGATCTATTTGAGGCGCTAAATGAAACCTTAACG  
CTATGGAACCTCGCCGCCGACTGGGCTGGCGATGAGCGAAATGTAGTGCTTACGTTGTCCCGCATTTGGT  
ACAGCGCAGTAACCGGCAAAATCGCGCCGAAGGATGTCGCTGCCGACTGGGCAATGGAGCGCTGCCGGC  
CCAGTATCAGCCCGTCATACTTGAAGCTAGACAGGCTTATCTTGACAAAGAAGAAGATCGCTTGGCCTCG  
CGCGCAGATCAGTTGGAAGAATTTGTCCACTACGTGAAAGGCGAGATCACCAAGGTAGTCGGCAAATAAT  
GTCTAGCTAGAAATTCGTTCAAGCCGACGCCGCTTCGCCGGCGTTAACTCAAGCGATTAGATGCACTAAG  
CACATAATTGCTCACAGCCAACTATCAGGTCAAGTCTGCTTTTATTATTTTAAAGCGTGATAATAAGC  
CCTACACAAATTGGGAGATATATCATGCATGACCAAAATCCCTTAACGTGAGTTTTCGTTCCACTGAGCG  
TCAGACCCCGTAGAAAAGATCAAAGGATCTTCTTGAGATCCTTTTTTCTGCGCGTAATCTGCTGCTTGC  
AAACAAAAAACCACCGCTACCAGCGGTGGTTTGTTCGCCGGATCAAGAGCTACCAACTCTTTTTCCGAA  
GGTAACTGGCTTCAGCAGAGCGCAGATACCAAATACTGTCTTCTAGTGTAGCCGTAGTTAGGCCACCAC  
TTCAAGAACTCTGTAGCACCGCCTACATACCTCGCTCTGCTAATCCTGTTACCAGTGGCTGCTGCCAGTG  
GCGATAAGTCGTGTCTTACCGGGTTGGACTCAAGACGATAGTTACCGGATAAGGCGCAGCGGTCCGGCTG  
AACGGGGGGTTCTGTGCACACAGCCCAGCTTGGAGCGAACGACCTACACCGAACTGAGATACCTACAGCGT  
GAGCTATGAGAAAGCGCCACGCTTCCCGAAGGGAGAAAGGCGGACAGGTATCCGTAAGCGGCAGGGTCG  
GAACAGGAGAGCGCACGAGGGAGCTTCCAGGGGGAAACGCCTGGTATCTTTATAGTCCTGTCGGGTTTCG  
CCACCTCTGACTTGAGCGTCGATTTTTGTGATGCTCGTCAGGGGGCGGAGCCTATGAAAAACGCCAGC  
AACGCGGCCTTTTTACGGTTCTTGCCCTTTTGCTGGCCTTTTGCTCACATGTTCTTTCCTGCGTTATCCC  
CTGATTCTGTGGATAACCGTATTACCGCCTTTGAGTGAGCTGATACCGCTCGCCGCAGCCGAACGACCGA  
GCGCAGCGAGTCAGTGAGCGAGGAAGCGGAAGAGCGCCTGATGCGGTATTTCTCCTTACGCATCTGTGC  
GGTATTTACACCGCATATGGTGCACCTCAGTACAATCTGCTCTGATGCCGCATAGTTAAGCCAGTATA  
CACTCCGCTATCGCTACGTGACTGGGTGATGGCTGCGCCCCGACACCCGCCAACACCCGCTGACGCGCCC  
TGACGGGCTTGTCTGCTCCCGGCATCCGCTTACAGACAAGCTGTGACCGTCTCCGGGAGCTGCATGTGTC  
AGAGGTTTTACCGTCAATACCGAAACGCGCGAGGCAGGGTGCCTTGATGTGGGCGCCGCGGTGAGTG  
GCGACGCGCGGCTTGTCGCGCCCTGGTAGATTGCCTGGCCGTAGGCCAGCCATTTTTGAGCGGCCAGC  
GGCCGCGATAGGCCGACGCGAAGCGGCGGGCGTAGGGAGCGCAGCGACCGAAGGGTAGGCGCTTTTTGC  
AGCTCTTCGGCTGTGCGCTGGCCAGACGTTATGCACAGGCCAGGCGGGTTTTAAGAGTTTTAATAAGTT  
TTAAAGAGTTTTAGGCGGAAAAATCGCCTTTTTTCTCTTTTATATCAGTCACTTACATGTGTGACCGGTT  
CCCAATGTACGGCTTTGGGTTCCCAATGTACGGGTTCCGTTCCCAATGTACGGCTTTGGGTTCCCAATG  
TACGTGCTATCCACAGGAAAGAGACCTTTTCGACCTTTTCCCCTGCTAGGGCAATTTGCCCTAGCATCT  
GCTCCGTACATTAGGAACCGGCGGATGCTTCGCCCTCGATCAGGTTGCGGTAGCGCATGACTAGGATCGG  
GCCAGCCTGCCCCGCTCCTCCTTCAAATCGTACTCCGGCAGGTCAATTTGACCCGATCAGCTTGCGCACG  
GTGAAACAGAACTTCTTGAACCTCTCCGGCGCTGCCACTGCGTTCGTAGATCGTCTTGAACAACCATCTGG  
CTTCTGCCTTGCTGCGGCGCGGCGTGCCAGGCGGTAGAGAAAACGGCCGATGCCGGGATCGATCAAAAA  
GTAATCGGGGTGAACCGTCAGCACGTCCGGGTCTTGCCCTTCTGTGATCTCGCGGTACATCCAATCAGCT  
AGCTCGATCTCGATGTACTCCGGCCGCCGCTTTCGCTCTTTACGATCTTGTAGCGGCTAATCAAGGCTT  
CACCTCGGATACCGTCACCAGGCGGCCGTTCTTGCCCTTCTTCGTACGCTGCATGGCAACGTGCGTGGT  
GTTTAACCGAATGCAGGTTTCTACCAGGTCGTCTTCTGCTTTCGCCCATCGGCTCGCCGGCAGAACTTG  
AGTACGTCCGCAACGTGTGGACGGAACACGCGGCCGGGCTTGTCTCCCTTCCCTTCCCGGTATCGGTTCA  
TGGATTTCGGTTAGATGGGAAACGCCCATCAGTACCAGGTCGTAATCCACACACTGGCCATGCCGGCCGG  
CCCTGCGGAAACCTCTACGTGCCCCTGGAAGCTCGTAGCGGATCACCTCGCCAGCTCGTCCGTCACGC

TTCGACAGACGGAACCGCCACGTCCATGATGCTGCGACTATCGCGGGTGCCACGTCATAGAGCATCG  
GAACGAAAAAATCTGGTTGCTCGTCGCCCTTGGGCGGCTTCCTAATCGACGGCGCACCGGCTGCCGGCGG  
TTGCCGGGATTCTTTGCGGATTTCGATCAGCGGCCGCTTGCCACGATTCACCGGGGCGTGCTTCTGCCTCG  
ATGCGTTGCCGCTGGGCGGCCGTGCGCGGCTTCAACTTCTCCACCAGGTCATACCCAGCGCCGCGCCGA  
TTTGTACCGGGCCGGATGGTTTGCGACCGTCACGCCGATTCTCGGGCTTGGGGGTTCCAGTGCCATTGC  
AGGGCCGGCAGACAACCCAGCCGCTTACGCCTGGCCAACCGCCCGTTCTTCCACACATGGGGCATTCCAC  
GGCGTCGGTGCCCTGGTTGTTCTTGATTTTCCATGCGGCCCTCTTTAGCCGCTAAAATTCATCTACTCATT  
TATTCATTGTCTCATTTACTCTGGTAGCTGCGCGATGTATTAGATAGCAGCTCGGTAATGGTCTTGCCCT  
TGGCGTACCGCGTACATCTTCAGCTTGGTGTGATCCTCCGCCGGCAACTGAAAGTTGACCCGCTTCATGG  
CTGGCGTGTCTGCCAGGCTGGCCAACGTTGCAGCCTTGCTGCTGCGTGCGCTCGGACGGCCGGCACTTAG  
CGTGTTTGTGCTTTTGCTCATTTTCTCTTTACCTCATTAACCTCAAATGAGTTTTGATTTAATTTACGCGG  
CCAGCGCCTGGACCTCGCGGGCAGCGTCGCCCTCGGGTTCTGATTCAAGAACGGTTGTGCCGGCGGCGGC  
AGTGCTTGGGTAGCTCAGCGCTGCGTGATACGGGACTCAAGAATGGGCAGCTCGTACCCGGCCAGCGCC  
TCGGCAACCTCACCGCCGATGCGCGTGCCCTTTGATCGCCCGGACACGACAAAAGCCGCTTGATAGCCTTC  
CATCCGTGACCTCAATGCGCTGCTTAACCAGCTCCACCAGGTCGGCGGTGGCCCATATGTCTGAAGGGCT  
TGGCTGCAACCGGAATCAGCACGAAGTCGGCTGCCTTGATCGCGGACACAGCCAAGTCCGCCGCCTGGGGC  
GCTCCGTGATCACTACGAAGTCGCGCCGCGCGATGGCCTTCACGTGCGGGTCAATCGTCGGGCGGTGCGA  
TGCCGACAACGGTTAGCGGTTGATCTTCCCGCACGGCCGCCAATCGCGGGCACTGCCCTGGGGATCGGA  
ATCGACTAACAGAACATCGGCCCCGGCGAGTTGCAGGGCGCGGGCTAGATGGGTTGCGATGGTTCGTCTTG  
CCTGACCCGCCTTTCTGGTTAAGTACAGCGATAACCTTCATGCGTTCCCTTGCGTATTTGTTTATTAC  
TCATCGCATCATATACGACGACCGCATGACGCAAGCTGTTTTACTCAAATACACATCACCTTTTTAGA  
CGGCGGCGCTCGGTTTCTTCAGCGGCCAAGCTGGCCGGCCAGGCCGCCAGCTTGGCATCAGACAAACCGG  
CCAGGATTTTCATGCAGCCGCACGGTTGAGACGTGCGCGGGCGGCTCGAACACGTACCCGGCCGCGATCAT  
CTCCGCCTCGATCTCTTCGGTAATGAAAAACGGTTTCGTCTGGCCGTCTGGTGCGGTTTCATGCTTGTT  
CCTCTTGCGGTTTATTCTCGGCGGCCGCCAGGGCGTCGGCTCGGTCAATGCGTCTCACGGAAGGCACC  
GCGCCGCCTGGCCTCGGTGGGCGTCACTTCCTCGCTGCGCTCAAGTGCGCGGTACAGGGTCGAGCGATGC  
ACGCCAAGCAGTGACGCCGCTCTTTACGGTGCGGCCCTTCCTGGTCGATCAGCTCGCGGGCGTGCGGA  
TCTGTGCCGGGTGAGGGTAGGGCGGGGCCAACTTCACGCCTCGGGCCTTGGCGGCCTCGCGCCCGCT  
CCGGGTGCGGTGATGATTAGGGAACGCTCGAACTCGGCAATGCCGGCGAACACGGTCAACACCATGCGG  
CCGGCCGGCGTGGTGGTGTCGGCCCCACGGCTCTGCCAGGCTACGCAGGCCCGCGCCGGCCTCCTGGATGC  
GCTCGGCAATGTCCAGTAGGTGCGGGTGCTGCGGGCCAGGCGGTCTAGCCTGGTCACTGTCAACACGTC  
GCCAGGGCGTAGGTGGTCAAGCATCCTGGCCAGCTCCGGGCGGTGCGCCTGGTGCCGGTGATCTTCTCG  
GAAAACAGCTTGGTGACGCCGGCCGCGTGACGTTCCGGCCGTTGGTTGGTCAAGTCCTGGTCGTCGGTGC  
TGACGCGGGCATAGCCAGCAGGCCAGCGCGGCGCTCTTGTTTCATGGCGTAATGTCTCCGGTTCTAGTC  
GCAAGTATTCTACTTTATGCGACTAAAACACGCGACAAGAAAACGCCAGGAAAAGGGCAGGGCGGCAGCC  
TGTCGCGTAACCTTAGGACTTGTGCGACATGTCGTTTTTCAAGACGGCTGCACTGAACGTGAGAAGCCGA  
CTGCACTATAGCAGCGAGGGGTTGGATCAAAGTACTTTGATCCCGAGGGGAACCCTGTGGTTGGCATGC  
ACATACAAATGGACGAACGGATAAACCTTTTACGCCCTTTTAAATATCCGTTATTCTAATAAACGCTCT  
TTTCTCTTAGGTTTACCCGCCAATATATCCTGTCAAACACTGATAGTTTAACTGAAGCGGGAAACGAC  
AATCTGATCCAAGCTCAAGCTAAGCTTGAGCTCTGCATGCCTGCAGGTCCCCAGATTAGCCTTTTCAATT  
TCAGAAAGAATGCTAACCCACAGATGGTTAGAGAGGCTTACGCAGAGGTCTCATCAAGACGATCTACCC  
GAGCAATAATCTCCAGGAAATCAAATACCTTCCCAAGAAGGTTAAAGATGCAGTCAAAAGATTGAGGACT  
AACTGCATCAAGAACACAGAGAAAGATATATTTCTCAAGATCAGAAGTACTATTCCAGTATGGACGATTC  
AAGGCTTGCTTCACAAACCAAGGCAAGTAATAGAGATTGGAGTCTCTAAAAAGGTAGTTCCCACTGAATC

AAAGGCCATGGAGTCAAAGATTCAAATAGAGGACCTAACAGAACTCGCCGTAAAGACTGGCGAACAGTTC  
ATACAGAGTCTCTTACGACTCAATGACAAGAAGAAAATCTTCGTCAACATGGTGGAGCACGACACACTTG  
TCTACTCCAAAAATATCAAAGATACAGTCTCAGAAGACCAAAGGGCAATTGAGACTTTTCAACAAAGGT  
AATATCCGGAAACCTCCTCGGATTCCATTGCCAGCTATCTGTCACTTTATTGTGAAGATAGTGAAAAAG  
GAAGGTGGCTCCTACAAATGCCATCATTGCGATAAAGGAAAGGCCATCGTTGAAGATGCCTCTGCCGACA  
GTGGTCCCAAAGATGGACCCCCACCCACGAGGAGCATCGTGAAAAAGAAGACGTTCCAACCACGTCTTC  
AAAGCAAGTGGATTGATGTGATATCTCCACTGACGTAAGGGATGACGCACAATCCCACTATCCTTCGCAA  
GACCCTTCTCTATATAAGGAAGTTCATTTTCATTTGGAGAGAACACGGGGGACTCTAGAGGATCCAAGGA  
GATATAAGCCGCCACCATGGATTACAAGGACGATGATGACAAGGACTACAAGGACGATGACGATAAGGAC  
TATAAGGATGACGATGACAAGGATTACGCCGAGGATGGATGATACTAGCGGACAAACTTTCGTTTCTGTG  
AACCTTCTGACGAAAGCAACACGGCAAGCACTAAAGTTGAAAACGTAAAATCGGAAGCGGATCGCTTGG  
AGTTTTTACGTAAAATGAATCCCTTTATTGTTGACGCTCTGGTGCGGAAAACCAATTATCAGGGTGCTCG  
CTTTCGCGCAAGAATAATAGGAGTGTGCGTGGATTGTGGTAGAAAACACGACAAGGCGCTCAAGACTGAA  
CGTAAGTGTAAGGTCAACAACACGCAATCTCAGAACGAGGTGGCGCATATGTTGATGCACGATCCCGTTA  
AGTATTTGAACAAAAGAAAGGCTAGAGCCTTTTCTAACGCAGAGATGTTTGCGATTGAACTGGTTTCGTA  
CACCAAGGAAAGGCAATTGGCGGTTCGATTTAGCCGCTGAAAGGGAGAAGACGAGACTGGCTCGTAGACAC  
CCAATACGTTCTCCGGAAGAACTCCGGAACATTATAAATTCGGTATGACTGCTAAGGCAATGTTACCGG  
ACATCAACGCCGTAGACGCGGGTGATAACGAGGAACTTCGTGCGAGTACCCAGTGAGTCTGAGTGTTTC  
TGGCGGAGTTCTCCGTGAACACCACTTCATCTGACCTAATGATATCCCGCGGCCATGCTAGAGTCCGCAA  
AAATCACCAGTCTCTCTCTACAAATCTATCTCTCTCTATTTTTCTCCAGAATAATGTGTGAGTAGTTCCC  
AGATAAGGGAATTAGGGTTCTTATAGGGTTTCGCTCATGTGTTGAGCATATAAGAAACCCTTAGTATGTA  
TTTGTATTTGTAAAATACTTCTATCAATAAAATTTCTAATTCCTAAAACCAAATCCAGTGACCTGCAGG  
CATGCGACGTCG



### Supplemental Data 3. Related sequences of N4p23 subcellular localization expression vector

#### Sequence of pH7LIC5.1.1 (35S-GFP-CCDB)

GGGTACCCTCGAATTATCATACATGAGAATTAAGGGAGTCACGTTATGACCCCGCCGATGACGCGGGACA  
AGCCGTTTTACGTTTGGAACTGACAGAACCGCAACGTTGAAGGAGCCACTGAGCCGCGGGTTTCTGGAGT  
TTAATGAGCTAAGCACATACGTCAGAAACCATTATTGCGCGTTCAAAAGTCGCCTAAGGTCACTATCAGC  
TAGCAAATATTTCTTGTCAAAAATGCTCCACTGACGTTCCATAAATCCCCTCGGTATCCAATTAGAGTC  
TCATATTCACCTCTCAACTCGAATCCCCCTATGAAAAAGCCTGAACTCACCGCGACGTCTGTGAGAAGT  
TTCTGATCGAAAAGTTCGACAGCGTCTCCGACCTGATGCAGCTCTCGGAGGGCGAAGAATCTCGTGCTTT  
CAGCTTCGATGTAGGAGGGCGTGATATGTCTGCGGGTAAATAGCTGCGCCGATGGTTTCTACAAAGAT  
CGTTATGTTTATCGGCACCTTTCATCGGCCGCGCTCCCGATTCCGGAAGTGCTTGACATTGGGGAGTTCA  
GCGAGAGCCTGACCTATTGCATCTCCCGCCGTGCACAGGGTGTACGTTGCAAGACCTGCCTGAAACCGA  
ACTGCCCGCTGTTCTTCAGCCGGTTCGCGGAGGCTATGGATGCTATCGCTGCGGCCGATCTTAGCCAGACG  
AGCGGGTTCGGCCCATTCGGACCGCAAGGAATCGGTCAATACACTACATGGCGTGATTTTCATATGCGCGA  
TTGCTGATCCCCATGTGTATCACTGGCAAACGTGTGATGGACGACACCGTCAGTGCGTCCGTCGCGCAGGC  
TCTCGATGAGCTGATGCTTTGGGCGAGGACTGCCCCGAAGTCCGGCACTCGTGACGCGGATTCGGCTCC  
AACAATGTCTGACGGACAATGGCCGCATAACAGCGGTCAATTGACTGGAGCGAGGCGATGTTGGGGATT  
CCCAATACGAGGTCGCCAACATCTTCTTCTGGAGGCCGTGGTTGGCTTGATGGAGCAGCAGACGCGCTA  
CTTCGAGCGGAGGCATCCGGAGCTTGCAGGATCGCCAAGGCTCCGGGCGTATATGCTCCGATTGGTCTT  
GACCAACTCTATCAGAGCTTGGTTGACGGCAATTTTCATGATGCAGCTTGGGCGAGGGTCGATGCGACG  
CAATCGTCCGATCCGGAGCCGGGACTGTGCGGGCGTACACAAATCGCCCGCAGAAGCGCGGCCGTCTGGAC  
CGATGGCTGTGTAGAAGTACTCGCCGATAGTGGAACCGACGCCCCAGCACTCGTCCGAGGGCAAAGGAA  
TAGAGTAGATGCCGACCGAACAAGAGCTGATTTGAGAACGCCTCAGCCAGCAACTCGCGCGAGCCTAGC  
AAGGCAAATGCGAGAGAACGGCCTTACGCTTGGTGGCACAGTTCTCGTCCACAGTTCGCTAAGCTCGCTC  
GGCTGGGTTCGCGGGAGGGCCGGTTCGAGTGATTTCAGGAATTAATTCCTAGAGTCAAGCAGATCGTTCAA  
ACATTTGGCAATAAAGTTTCTTAAGATTGAATCCTGTTGCCGGTCTTGCGATGATTATCATATAATTTCT  
GTTGAATTACGTTAAGCATGTAATAATTAACATGTAATGCATGACGTTATTTATGAGATGGGTTTTTATG  
ATTAGAGTCCCGCAATTATACATTTAATACGCGATAGAAAACAAAATATAGCGCGCAAACTAGGATAAAT  
TATCGCGCGCGGTGTATCTATGTTACTAGATCGACCGCATGCAAGCTGATAATTCAATTCGGCGTTAA  
TTCAGTACATTAAAAACGTCCGCAATGTGTTATTAAGTTGTCTAAGCGTCAATTTGTTTACACCACAATA  
TATCCTGCCACCAGCCAGCCAACAGCTCCCCGACCGGCAGCTCGGCACAAAATCACCCTCGATACAGGC  
AGCCCATCAGTCCGGGACGGCGTCAGCGGGAGAGCCGTTGTAAGGCGGCAGACTTTGCTCATGTTACCGA  
TGCTATTCCGAAGAACGGCAACTAAGCTGCCGGGTTTGAAACACGGATGATCTCGCGGAGGGTAGCATGT  
TGATTGTAACGATGACAGAGCGTTGCTGCCTGTGATCAATTGCGGCACGAACCCAGTGGACATAAGCCTC  
GTTCCGGTTCGTAAGCTGTAATGCAAGTAGCGTAACTGCCGTACGCAACTGGTCCAGAACCTTGACCGAA  
CGCAGCGGTGGTAACGGCGCAGTGGCGGTTTTTCATGGCTTCTTGTTATGACATGTTTTTTTGGGGTACAG  
TCTATGCCTCGGGCATCCAAGCAGCAAGCGGTTACGCCGTGGGTGATGTTTGATGTTATGGAGCAGCA  
ACGATGTTACGCAGCAGGGCAGTCGCCCTAAAACAAAGTTAAACATCATGGGGGAAGCGGTGATCGCCGA  
AGTATCGACTCAACTATCAGAGGTAGTTGGCGTCATCGAGCGCCATCTCGAACCGACGTTGCTGGCCGTA  
CATTTGTACGGCTCCGCAGTGATGGCGGCCTGAAGCCACACAGTGATATTGATTTGCTGGTTACGGTGA  
CCGTAAGGCTTGATGAAACAACGCGCGAGCTTTGATCAACGACCTTTTGAAACTTCGGCTTCCCCTGG  
AGAGAGCGAGATTCTCCGCGCTGTAGAAGTCACCATTTGTTGTGCACGACGACATCATTCCTGGCGTTAT  
CCAGCTAAGCGCGAACTGCAATTTGGAGAATGGCAGCGCAATGACATTCTTGAGGTATCTTCGAGCCAG

CCACGATCGACATTGATCTGGCTATCTTGCTGACAAAAGCAAGAGAACATAGCGTTGCCTTGGTAGGTCC  
AGCGGCGGAGGAACCTCTTTGATCCGGTTCTCTGAACAGGATCTATTTGAGGCGCTAAATGAAACCTTAACG  
CTATGGAACTCGCCGCCGACTGGGCTGGCGATGAGCGAAATGTAGTGCTTACGTTGTCCCGCATTTGGT  
ACAGCGCAGTAACCGGCAAAATCGCGCCGAAGGATGTCGCTGCCGACTGGGCAATGGAGCGCTGCCGGC  
CCAGTATCAGCCCGTCATACTTGAAGCTAGACAGGCTTATCTTGGACAAGAAGAAGATCGCTTGGCCTCG  
CGCGCAGATCAGTTGGAAGAATTTGTCCACTACGTGAAAGGCGAGATCACCAAGGTAGTCGGCAAATAAT  
GTCTAGCTAGAAATTCGTTCAAGCCGACGCCGCTTCGCCGGCGTTAACTCAAGCGATTAGATGCACTAAG  
CACATAATTGCTCACAGCCAACTATCAGGTCAAGTCTGCTTTTATTATTTTAAAGCGTCATAATAAGC  
CCTACACAAATTGGGAGATATATCATGCATGACCAAAATCCCTTAACGTGAGTTTTCTGTTCCACTGAGCG  
TCAGACCCCGTAGAAAAGATCAAAGGATCTTCTTGAGATCCTTTTTTTCTGCGCGTAATCTGCTGCTTGC  
AAACAAAAAAACCACCGCTACCAGCGGTGGTTTGTGTTGCCGGATCAAGAGCTACCAACTCTTTTTCCGAA  
GGTAACTGGCTTCAGCAGAGCGCAGATACCAAATACTGTCTTCTAGTGTAGCCGTAGTTAGGCCACCAC  
TTCAAGAACTCTGTAGCACCGCCTACATACCTCGCTCTGCTAATCCTGTTACCAGTGGCTGCTGCCAGTG  
GCGATAAGTCGTGTCTTACCGGGTTGGACTCAAGACGATAGTTACCGGATAAGGCGCAGCGGTGCGGCTG  
AACGGGGGGTTTCGTGCACACAGCCCAGCTTGGAGCGAACGACCTACACCGAACTGAGATACCTACAGCGT  
GAGCTATGAGAAAGCGCCACGCTTCCCGAAGGGAGAAAGGCGGACAGGTATCCGGTAAGCGGCAGGGTCG  
GAACAGGAGAGCGCACGAGGGAGCTTCCAGGGGGAACGCCTGGTATCTTTATAGTCCTGTGCGGTTTTCG  
CCACCTCTGACTTGAGCGTCGATTTTTGTGATGCTCGTCAGGGGGCGGAGCCTATGGA AAAACGCCAGC  
AACGCGGCCTTTTTACGGTTCTTGGCCTTTTGCTGGCCTTTTGCTCACATGTTCTTTCTGCGTTATCCC  
CTGATTCTGTGGATAACCGTATTACCGCCTTTGAGTGAGCTGATACCGCTCGCCGCAGCCGAACGACCGA  
GCGCAGCGAGTCAGTGAGCGAGGAAGCGGAAGAGCGCCTGATGCGGTATTTTCTCCTTACGCATCTGTGC  
GGTATTTACACCGCATATGGTGCACTCTCAGTACAATCTGCTCTGATGCCGCATAGTTAAGCCAGTATA  
CACTCCGCTATCGCTACGTGACTGGGTTCATGGCTGCGCCCCGACACCCGCCAACACCCGCTGACGCGCCC  
TGACGGGCTTGTCTGCTCCCGGCATCCGCTTACAGACAAGCTGTGACCGTCTCCGGGAGCTGCATGTGTC  
AGAGGTTTTACCGTTCATCACGAAACGCGCGAGGCAGGGTGCCTTGATGTGGGCGCCGCGGTGAGTG  
GCGACGGCGCGGCTTGTCGCGCCCTGGTAGATTGCCTGGCCGTAGGCCAGCCATTTTTGAGCGGCCAGC  
GGCCGCGATAGGCCGACGCGAAGCGGCGGGCGTAGGGAGCGCAGCGACCGAAGGGTAGGCGCTTTTTGC  
AGCTCTTCGGCTGTGCGCTGGCCAGACAGTTATGCACAGGCCAGGCGGGTTTTAAGAGTTTTAATAAGTT  
TTAAAGAGTTTTAGGCGGAAAAATCGCCTTTTTTCTCTTTTATATCAGTCACTTACATGTGTGACCGGTT  
CCCAATGTACGGCTTTGGGTTCCCAATGTACGGGTTCGGTTCCCAATGTACGGCTTTGGGTTCCCAATG  
TACGTGCTATCCACAGGAAAGAGACCTTTTCGACCTTTTCCCCTGCTAGGGCAATTTGCCCTAGCATCT  
GCTCCGTACATTAGGAACCGGCGGATGCTTCGCCCTCGATCAGGTTGCGGTAGCGCATGACTAGGATCGG  
GCCAGCTGCCCCGCTCCTCCTTCAAATCGTACTCCGGCAGGTCAATTGACCCGATCAGCTTGCGCACG  
GTGAAACAGAACTTCTTGAACCTCTCCGGCGCTGCCACTGCGTTCGTAGATCGTCTTGAACAACCATCTGG  
CTTCTGCCTTGCTGCGGCGCGGCGTGCCAGGCGGTAGAGAAAACGGCCGATGCCGGGATCGATCAAAAA  
GTAATCGGGGTGAACCGTCAGCACGTCCGGGTCTTGCCCTCTGTGATCTCGCGGTACATCCAATCAGCT  
AGCTCGATCTCGATGTACTCCGGCCGCCGGTTTTCGCTCTTTACGATCTTGTAGCGGCTAATCAAGGCTT  
CACCTCGGATACCGTCACCAGGCGGCCGTTCTTGCCCTTCTTCGTACGCTGCATGGCAACGTGCGTGGT  
GTTTAACCGAATGCAGGTTTCTACCAGGTCGTCTTTCTGCTTTCCGCCATCGGCTCGCCGGCAGAACTTG  
AGTACGTCCGCAACGTGTGGACGGAACACGCGGCCGGGCTTGTCTCCCTTCCCTTCCCGGTATCGGTTCA  
TGGATTTCGGTTAGATGGGAAACGCCCATCAGTACCAGGTCGTAATCCACACACTGGCCATGCCGGCCGG  
CCCTGCGGAAACCTCTACGTGCCCGTCTGGAAGCTCGTAGCGGATCACCTCGCCAGCTCGTCGGTCACGC  
TTTCGACAGACGGAACCGCCACGTCCATGATGCTGCGACTATCGCGGGTGCCACGTATAGAGCATCG  
GAACGAAAAAATCTGGTTGCTCGTCGCCCTTGGGCGGCTTCCTAATCGACGGCGCACCGGCTGCCGGCGG

TTGCCGGGATTCTTTGCGGATTTCGATCAGCGGCCGCTTGCCACGATTACCGGGGCGTGCTTCTGCCTCG  
ATGCGTTGCCGCTGGGCGGCCGTGCGCGGCCCTCAACTTCTCCACCAGGTCATCACCCAGCGCCGCGCCGA  
TTTGTACCGGGCCGGATGGTTTGCGACCGTACGCCGATTCCCTCGGGCTTGGGGGTTCCAGTGCCATTGC  
AGGGCCGGCAGACAACCCAGCCGCTTACGCCTGGCCAACCGCCCGTTCCCTCCACACATGGGGCATTCCAC  
GGCGTCGGTGCCTGGTTGTTCTTGATTTTCCATGCCGCCCTCCTTTAGCCGCTAAAATTCATCTACTCATT  
TATTCATTTGCTCATTTACTCTGGTAGCTGCGCGATGTATTTCAGATAGCAGCTCGGTAATGGTCTTGCCT  
TGGCGTACCGCGTACATCTTCAGCTTGGTGTGATCCTCCGCCGGCAACTGAAAGTTGACCCGCTTCATGG  
CTGGCGTGTCTGCCAGGCTGGCCAACGTTGCAGCCTTGTGCTGCGTGCCTCGGACGGCCGGCACTTAG  
CGTGTTTGTGCTTTTGTCTCATTTTCTCTTTACCTCATTAACCAAATGAGTTTTGATTTAATTTACGCGG  
CCAGCGCCTGGACCTCGCGGGCAGCGTCGCCCTCGGGTTCTGATTCAAGAACGGTTGTGCCGGCGGCGGC  
AGTGCTTGGGTAGCTCAGCGCTGCGTGATACGGGACTCAAGAATGGGCAGCTCGTACCCGGCCAGCGCC  
TCGGCAACCTCACCGCCGATGCGCGTGCCTTTGATCGCCCGGACACGACAAAGGCCGCTTGTAGCCTTC  
CATCCGTGACCTCAATGCGCTGCTTAACCAGCTCCACCAGGTGGCGGTGGCCCATATGTCGTAAGGGCT  
TGGCTGCACCGGAATCAGCACGAAGTCGGCTGCCTTGATCGCGGACACAGCCAAGTCCGCCGCTTGGGGC  
GCTCCGTCGATCACTACGAAGTCGCGCCGGCCGATGGCCTTCACGTGCGGGTCAATCGTCGGGCGGTGCGA  
TGCCGACAACGGTTAGCGGTGATCTTCCCGCACGGCCGCCAATCGCGGGCACTGCCCTGGGGATCGGA  
ATCGACTAACAGAACATCGGCCCCGGCGAGTTGCAGGGCGCGGGCTAGATGGGTGCGATGGTCTGCTTG  
CCTGACCCGCTTTCTGGTTAAGTACAGCGATAACCTTCATGCGTTCCCTTGCGTATTTGTTTATTAC  
TCATCGCATCATATACGCAGCGACCGCATGACGCAAGCTGTTTTACTCAAATACACATCACCTTTTTAGA  
CGGCGGCGCTCGGTTTCTTCAGCGGCCAAGCTGGCCGGCCAGGCCGCCAGCTTGGCATCAGACAAACCGG  
CCAGGATTTTCATGCAGCCGACGGTTGAGACGTGCGCGGGCGGCTCGAACACGTACCCGGCCGCGATCAT  
CTCCGCCTCGATCTCTTCGGTAATGAAAAACGGTTTCGTCTGGCCGTCTGGTGCAGTTTCATGCTTGTT  
CCTCTTGGCGTTCAATCTCGGCGGCCGCCAGGGCGTCGGCTCGGTCAATGCGTCCTCACGGAAGGCACC  
GCGCCGCTTGGCCTCGGTGGGCGTCACTTCCTCGCTGCGCTCAAGTGCAGGTACAGGGTCGAGCGATGC  
ACGCCAAGCAGTGCAGCCGCTCTTTACGGTGCAGCTTCCTGGTCGATCAGCTCGCGGGCGTGCAGCA  
TCTGTGCCGGGGTGAGGGTAGGGCGGGGGCCAACTTCACGCCTCGGGCCTTGGCGGCCCTCGCGCCCGCT  
CCGGGTGCGGTGCGATGATTAGGAACGCTCGAACTCGGCAATGCCGGCGAACACGGTCAACACCATGCGG  
CCGGCCGGCGTGGTGGTGTGCGGCCACGGCTCTGCCAGGCTACGAGGCCCGCGCGGCCCTCTGGATGC  
GCTCGGCAATGTCCAGTAGGTGCGGGTGCTGCGGGCCAGGCGGTCTAGCCTGGTCACTGTCAACAGTC  
GCCAGGGCGTAGGTGGTCAAGCATCCTGGCCAGCTCCGGCGGTGCGGCCTGGTGCCGGTGATCTTCTCG  
GAAACAGCTTGGTGCAGCCGGCCGCGTGCAGTTCGGCCCGTTGGTTGGTCAAGTCTGGTGCCTGCGTGC  
TGACGCGGGCATAGCCAGCAGGCCAGCGCGGCGCTCTTGTTTCATGGCGTAATGTCTCCGGTTCTAGTC  
GCAAGTATTCTACTTTATGCGACTAAAACACGCGACAAGAAAACGCCAGGAAAAGGGCAGGGCGGCAGCC  
TGTCGCGTAACCTTAGGACTTGTGCGACATGTGTTTTTCAAGAAGCGGTGCACTGAACGTGAGAAGCCGA  
CTGCACTATAGCAGCGGAGGGGTTGGATCAAAGTACTTTGATCCCGAGGGGAACCCTGTGGTTGGCATGC  
ACATACAAATGGACGAACGGATAAACCTTTTACGCCCTTTTAAATATCCGTTATTCTAATAAACGCTCT  
TTTCTCTTAGGTTTACCCGCCAATATATCCTGTCAAACACTGATAGTTTAACTGAAGCGGGAAACGAC  
AATCTGATCCAAGCTCAAGCTAAGCTTGAGCTCTGCATGCCTGCAGGTCCCCAGATTAGCCTTTTCAATT  
TCAGAAAGAAATGCTAACCCACAGATGGTTAGAGAGGCTTACGCAGCAGGTCTCATCAAGACGATCTACCC  
GAGCAATAATCTCCAGGAAATCAAATACCTTCCCAAGAAGGTTAAAGATGCAGTCAAAAGATTTCAGGACT  
AACTGCATCAAGAACACAGAGAAAGATATATTTCTCAAGATCAGAAGTACTATTCCAGTATGGACGATTC  
AAGGCTTGCTTCACAAACCAAGGCAAGTAATAGAGATTGGAGTCTCTAAAAAGGTAGTTCCCACTGAATC  
AAAGGCCATGGAGTCAAAGATTCAAATAGAGGACCTAACAGAACTCGCCGTAAAGACTGGCGAACAGTTTC  
ATACAGAGTCTCTTACGACTCAATGACAAGAAGAAAATCTTCGTCAACATGGTGGAGCACGACACACTTG

TCTACTCCAAAAATATCAAAGATACAGTCTCAGAAGACCAAAGGGCAATTGAGACTTTTCAACAAAGGGT  
AATATCCGGAAACCTCCTCGGATTCCATTGCCCAGCTATCTGTCACTTTATTGTGAAGATAGTGAAAAAG  
GAAGGTGGCTCCTACAAATGCCATCATTGCGATAAAGGAAAAGGCCATCGTTGAAGATGCCTCTGCCGACA  
GTGGTCCCAAAGATGGACCCCCACCCACGAGGAGCATCGTGAAAAAGAAGACGTTCCAACCACGTCTTC  
AAAGCAAGTGGATTGATGTGATATCTCCACTGACGTAAGGGATGACGCACAATCCCACTATCCTTCGCAA  
GACCTTTCCTCTATATAAGGAAGTTCATTTTCAATTTGGAGAGAACACGGGGGACTCTAGAGGATCCAAGGA  
GATATAAGCCGCCACCATGGTGAGCAAGGGCGAGGAGCTGTTACCGGGGTGGTGCCCATCCTGGTCGAG  
CTGGACGGCGACGTAAACGGCCACAAGTTCAGCGTGTCCGGCGAGGGCGAGGGCGATGCCACCTACGGCA  
AGCTGACCCTGAAGTTCATCTGCACCACCGGCAAGCTGCCCCTGCCCTGGCCCACCCTCGTGACCACCCT  
GACCTACGGCGTGACGTGCTTCAGCCGTACCCCCGACCACATGAAGCAGCACGACTTCTTCAAGTCCGCC  
ATGCCCCGAAGGCTACGTCCAGGAGCGCACCATCTTCTTCAAGGACGACGGCAACTACAAGACCCGCGCCG  
AGGTGAAGTTCGAGGGCGACACCCTGGTGAACCGCATCGAGCTGAAGGGCATCGACTTCAAGGAGGACGG  
CAACATCCTGGGGCACAAGCTGGAGTACAACCTACAACAGCCACAACGTCTATATCATGGCCGACAAGCAG  
AAGAACGGCATCAAGGTGAACCTTCAAGATCCGCCACAACATCGAGGACGGCAGCGTGCAGCTCGCCGACC  
ACTACCAGCAGAACACCCCCATCGGCGACGGCCCCGTGTGCTGCTGCCCCGACAACCACTACCTGAGCACCCA  
GTCCGCCCTGAGCAAAGACCCCAACGAGAAGCGCGATCACATGGTCCTGCTGGAGTTCGTGACCGCCGCC  
GGGATCACTCTCGGCATGGACGAGCTGTACAAGGATTACGCCGAGGCCTGTGACCTGCAGACTGGCTGT  
GTATAAGGGAGCCTGACATTTATATTCCCCAGAACATCAGGTTAATGGCGTTTTTGTATGTCATTTTCGCG  
GTGGCTGAGATCAGCCACTTCTTCCCCGATAACGGAGACCGGCACACTGGCCATATCGGTGGTCATCATG  
CGCCAGCTTTTCATCCCCGATATGCACCACCGGGTAAAGTTCACGGGAGACTTTATCTGACAGCAGACGTG  
CACTGGCCAGGGGATCACCATCCGTGCCCCGGGCGTGTCAATAATATCACTCTGTACATCCACAAACAG  
ACGATAACGGCTCTCTCTTTTATAGGTGTAAACCTTAACTGCATTTACCAGCCCCCTGTTCTCGTCAGC  
AAAAGAGCCGTTCAATTTCAATAAACCGGGCGACCTCAGCCATCCCTTCCTGATTTTCCGCTTTCAGCGT  
TCGGCAGCAGACGACGGGCTTCATTCTGCATGGTTGTGCTTACCAGACCGGAGATATTGACATCATATA  
TGCTTTGAGCAACTGATAGCTGTGCTGTCAACTGTCACTGTAAATACGCTGCTTCATAGCATACCTCTTT  
TTGACATACTTCGGGTATACATATCAGTATATATTCTTATACCGCAAAAAATCAGCGCGCAAAATACGCATA  
CTGTTATCTGGCTTTTAGTAAGCCGGATCCACGCGTTTACGCCCCGCCCTGCCACTCATCGCAGTACTGT  
TGTAATTCATTAAGCATTCTGCCGACATGGAAGCCATCACAGACGGCATGATGAACCTGAATCGCCAGCG  
GCATCAGCACCTTGTGCTTGTGCTATAATATTTGCCCATGGTGAAAACGGGGCGAAGAAGTTGTCCAT  
ATTGGCCACGTTTAAATCAAACTGGTGAACTCACCCAGGGATTGGCTGAGACGAAAAACATATTCTCA  
ATAAACCCTTTAGGGAAATAGGCCAGGTTTTACCGTAACACGCCACATCTTGCAATATATGTGTAGAA  
ACTGCCGAAATCGTCGTGGTATTCACTCCAGAGCGATGAAAACGTTTCAGTTTGCTCATGAAAACGGT  
GTAACAAGGGTGAACACTATCCCATATCACCAGCTCACCGTCTTTCATTGCCATACGGAATCCGGATGA  
GCATTATCAGCGGGCAAGAATGTGAATAAAGGCCGATAAACTTGTGCTTATTTTTCTTTACGGTCT  
TTAAAAAGGCCGTAATATCCAGCTGAACGGTCTGGTTATAGGTACATTGAGCAACTGACTGAAATGCCTC  
AAAATGTTCTTTACGATGCCATTGGGATATATCAACGGTGGTATATCCAGTGATTTTTTTCTCCATTTTA  
GCTTCCTTAGCTCCTGAAAATCTCGCCGGATCCTAACTCAAAATCCACACATTATACGAGCCGGAAGCAT  
AAAGTGTAAGCCTGGGGTGCCTAATGCGGCCGAGGCCTCTTCCCTAATGATATCCCGCGGCCATGCTA  
GAGTCCGCAAAAATCACCAGTCTCTCTCTACAAATCTATCTCTCTATTTTTCTCCAGAATAATGTGTG  
AGTAGTTCACAGATAAGGGAATTAGGGTCTTATAGGGTTTCGCTCATGTGTGAGCATATAAGAAACCC  
TTAGTATGATTTGTATTTGTAAAATACTTCTATCAATAAAATTTCTAATTCCTAAAACCAAAATCCAGT  
GACCTGCAGGCATGCGACGTGCG

**Sequence of pH7LIC5.1.1-C2b (35S-GFP-C2b)**

GGGTACCCCTCGAATTATCATACATGAGAATTAAGGGAGTCACGTTATGACCCCGCCGATGACGCGGGACA  
AGCCGTTTTACGTTTGGAACTGACAGAACC GCAACGTTGAAGGAGCCACTGAGCCGCGGGTTTCTGGAGT  
TTAATGAGCTAAGCACATACGTCAGAAACCATTATTGCGCGTTCAAAAGTCGCCTAAGGTCATATCAGC  
TAGCAAATATTTCTTGTCAAAAATGCTCCACTGACGTTCCATAAATCCCCCTCGGTATCCAATTAGAGTC  
TCATATTCACTCTCAACTCGAATCCCCCTATGAAAAAGCCTGAACTCACCGCGACGTCTGTGAGAAGT  
TTCTGATCGAAAAGTTCGACAGCGTCTCCGACCTGATGCAGCTCTCGGAGGGCGAAGAATCTCGTGCTTT  
CAGCTTCGATGTAGGAGGGCGTGATATGTCTGCGGGTAAATAGCTGCGCCGATGGTTTCTACAAAGAT  
CGTTATGTTTATCGGCACTTTGCATCGGCCGCGCTCCCGATTCCGGAAGTGCTTGACATTGGGGAGTTCA  
GCGAGAGCCTGACCTATTGCATCTCCCGCCGTGCACAGGGTGTACGTTGCAAGACCTGCCTGAAACCGA  
ACTGCCCGCTGTTCTTCAGCCGGTCGCGGAGGCTATGGATGCTATCGCTGCGGCCGATCTTAGCCAGACG  
AGCGGGTTCGGCCCATTCGGACCGCAAGGAATCGGTCAATACACTACATGGCGTGATTTTCATATGCGCGA  
TTGCTGATCCCCATGTGTATCACTGGCAAACGTGTGATGGACGACACCGTCAGTGCGTCCGTCGCGCAGGC  
TCTCGATGAGCTGATGCTTTGGGCGAGGACTGCCCGAAGTCCGGCACTCGTGACGCGGGATTTCGGCTCC  
AACAATGTCTGACGGACAATGGCCGCATAACAGCGGTCAATTGACTGGAGCGAGGCGATGTTTCGGGGATT  
CCCAATACGAGGTCGCCAACATCTTCTTCTGGAGGCCGTGGTTGGCTTGATGGAGCAGCAGACGCGCTA  
CTTCGAGCGGAGGCATCCGGAGCTTGCAGGATCGCCAAGGCTCCGGGCGTATATGCTCCGCATTGGTCTT  
GACCAACTCTATCAGAGCTTGGTTGACGGCAATTTTCGATGATGCAGCTTGGGCGCAGGGTCGATGCGACG  
CAATCGTCCGATCCGGAGCCGGGACTGTCGGGCGTACACAAATCGCCCGCAGAAGCGCGGCCGTCTGGAC  
CGATGGCTGTGTAGAAGTACTCGCCGATAGTGAAACCGACGCCCCAGCACTCGTCCGAGGGCAAAGGAA  
TAGAGTAGATGCCGACCGAACAAGAGCTGATTTGAGAACGCCTCAGCCAGCAACTCGCGCGAGCCTAGC  
AAGGCAAAATGCGAGAGAACGGCCTTACGCTTGGTGGCACAGTTCTCGTCCACAGTTCGCTAAGCTCGCTC  
GGCTGGGTCGCGGGAGGGCCGGTCGCAGTGATTTCAGGAATTAATTCCCTAGAGTCAAGCAGATCGTTCAA  
ACATTTGGCAATAAAGTTTCTTAAGATTGAATCCTGTTGCCGGTCTTGCATGATTATCATATAATTTCT  
GTTGAATTACGTTAAGCATGTAATAATTAACATGTAATGCATGACGTTATTTATGAGATGGGTTTTTATG  
ATTAGAGTCCCGCAATTATACATTTAATACGCGATAGAAAACAAAATATAGCGCGCAAACCTAGGATAAAT  
TATCGCGCGCGGTGTATCTATGTTACTAGATCGACCGGCATGCAAGCTGATAATTCAATTCGGCGTTAA  
TTCAGTACATTAAAAACGTCCGCAATGTGTTATTAAGTTGTCTAAGCGTCAATTTGTTTACACCACAATA  
TATCCTGCCACCAGCCAGCCAACAGCTCCCCGACCGGCAGCTCGGCACAAAATCACCCTCGATACAGGC  
AGCCCATCAGTCCGGGACGGCGTCAGCGGGAGAGCCGTTGTAAGGCGGCAGACTTTGCTCATGTTACCGA  
TGCTATTTCGGAAGAACGGCAACTAAGCTGCCGGGTTTGAACACGGATGATCTCGCGGAGGGTAGCATGT  
TGATTGTAACGATGACAGAGCGTTGCTGCCTGTGATCAATTTCGGGCACGAACCCAGTGGACATAAGCCTC  
GTTTCGGTTCGTAAGCTGTAATGCAAGTAGCGTAAC TGCCGTCACGCAACTGGTCCAGAACCTTGACCGAA  
CGCAGCGGTGGTAACGGCGCAGTGGCGGTTTTTCATGGCTTCTTGTTATGACATGTTTTTTTTGGGGTACAG  
TCTATGCCTCGGGCATCCAAGCAGCAAGCGGTTACGCCGTGGGTCGATGTTTGATGTTATGGAGCAGCA  
ACGATGTTACGCAGCAGGGCAGTCGCCCTAAAAACAAAGTTAAACATCATGGGGGAAGCGGTGATCGCCGA  
AGTATCGACTCAACTATCAGAGGTAGTTGGCGTCATCGAGCGCCATCTCGAACCGACGTTGCTGGCCGTA  
CATTTGTACGGCTCCGCACTGGATGGCGGCCTGAAGCCACACAGTGATATTGATTTGCTGGTTACGGTGA  
CCGTAAGGCTTGATGAAACAACGCGGCAGCTTTGATCAACGACCTTTTGAAACTTCGGCTTCCCCTGG  
AGAGAGCGAGATTCTCCGCGCTGTAGAAGTCACCATTGTTGTGCACGACGACATCATTCCGTGGCGTTAT  
CCAGCTAAGCGCGAACTGCAATTTGGAGAATGGCAGCGCAATGACATTCTTGACAGGTATCTTCGAGCCAG  
CCACGATCGACATTGATCTGGCTATCTTGCTGACAAAAGCAAGAGAACATAGCGTTGCCTTGGTAGGTCC  
AGCGGCGGAGGAACCTTTTGATCCGTTCTCTGAACAGGATCTATTTGAGGCGCTAAATGAAACCTTAACG  
CTATGGAACCTCGCCGCCGACTGGGCTGGCGATGAGCGAAATGTAGTGCTTACGTTGTCCCGCATTTGGT  
ACAGCGCAGTAACCGGCAAAATCGCGCCGAAGGATGTCGCTGCCGACTGGGCAATGGAGCGCCTGCCGGC

CCAGTATCAGCCCGTCATACTTGAAGCTAGACAGGCTTATCTTGGACAAGAAGAAGATCGCTTGGCCTCG  
CGCGCAGATCAGTTGGAAGAATTTGTCCACTACGTGAAAGGCGAGATCACCAAGGTAGTCGGCAAATAAT  
GTCTAGCTAGAAATTCGTTCAAGCCGACGCCGCTTCGCCGGCGTTAACTCAAGCGATTAGATGCACTAAG  
CACATAATTGCTCACAGCCAACTATCAGGTCAAGTCTGCTTTTATTATTTTAAAGCGTGCATAATAAGC  
CCTACACAAATTGGGAGATATATCATGCATGACCAAAATCCCTTAACGTGAGTTTTCGTTCCACTGAGCG  
TCAGACCCCGTAGAAAAGATCAAAGGATCTTCTTGAGATCCTTTTTTTCTGCGCGTAATCTGCTGCTTGC  
AAACAAAAAACCACCGCTACCAGCGGTGGTTTGTGTTGCCGGATCAAGAGCTACCAACTCTTTTTCCGAA  
GGTAACTGGCTTCAGCAGAGCGCAGATACCAAATACTGTCTTCTAGTGTAGCCGTAGTTAGGCCACCAC  
TTCAAGAACTCTGTAGCACCGCCTACATACCTCGCTCTGCTAATCCTGTTACCAGTGGCTGCTGCCAGTG  
GCGATAAGTCGTGCTTTACCGGGTTGGACTCAAGACGATAGTTACCGGATAAGGCGCAGCGGTGCGGGCTG  
AACGGGGGGTTCTGTGCACACAGCCCAGCTTGGAGCGAACGACCTACACCGAACTGAGATACCTACAGCGT  
GAGCTATGAGAAAGCGCCACGCTTCCCGAAGGGAGAAAGGCGGACAGGTATCCGGTAAGCGGCAGGGTCG  
GAACAGGAGAGCGCACGAGGGAGCTTCCAGGGGAAACGCCCTGGTATCTTTATAGTCCTGTCGGGTTTCG  
CCACCTCTGACTTGAGCGTCGATTTTTGTGATGCTCGTCAGGGGGCGGAGCCTATGAAAAACGCCAGC  
AACCGCGCCTTTTTACGGTTCTTGCCCTTTTGCTGGCCTTTTGCTCACATGTTCTTTCTGCGTTATCCC  
CTGATTCTGTGGATAACCGTATTACCGCCTTTGAGTGAGCTGATACCGCTCGCCGCAGCCGAACGACCGA  
GCGCAGCGAGTCAGTGAGCGAGGAAGCGGAAGAGCGCCTGATGCGGTATTTTCTCCTTACGCATCTGTGC  
GGTATTTACACCGCATATGGTGCACTCTCAGTACAATCTGCTCTGATGCCGCATAGTTAAGCCAGTATA  
CACTCCGCTATCGCTACGTGACTGGGTCATGGCTGCGCCCCGACACCCGCCAACACCCGCTGACGCGCCC  
TGACGGGCTTGTCTGCTCCCGGCATCCGCTTACAGACAAGCTGTGACCGTCTCCGGGAGCTGCATGTGTC  
AGAGGTTTTACCGTCATACCGAAACGCGCGAGGCAGGGTGCTTGATGTGGGCGCCGGCGGTGAGTG  
GCGACGGCGCGGCTTGTCCGCGCCCTGGTAGATTGCCGTGCCGTAGGCCAGCCATTTTTGAGCGGCCAGC  
GGCCGCGATAGGCCGACGCGAAGCGCGGGGCGTAGGGAGCGCAGCGACCGAAGGGTAGGCGCTTTTTGC  
AGCTCTTCGGCTGTGCGCTGGCCAGACAGTTATGCACAGGCCAGGCGGGTTTTAAGAGTTTTAATAAGTT  
TTAAAGAGTTTTAGGCGGAAAAATCGCCTTTTTTCTCTTTTATATCAGTCACTTACATGTGTGACCGGTT  
CCCAATGTACGGCTTTGGGTTCCCAATGTACGGGTTCGGTTCCCAATGTACGGCTTTGGGTTCCCAATG  
TACGTGCTATCCACAGGAAAGAGACCTTTTCGACCTTTTCCCCTGCTAGGGCAATTTGCCCTAGCATCT  
GCTCCGTACATTAGGAACCGGCGGATGCTTCGCCCTCGATCAGGTTGCGGTAGCGCATGACTAGGATCGG  
GCCAGCCTGCCCCGCTCCTCCTTCAAATCGTACTCCGGCAGGTCAATTTGACCCGATCAGCTTGCGCACG  
GTGAAACAGAACTTCTTGAACCTCTCCGGCGCTGCCACTGCGTTCTGTAGATCGTCTTGAACAACCATCTGG  
CTTCTGCCTTGCTGCGGCGCGGCGTGCCAGGCGGTAGAGAAAACGGCCGATGCCGGGATCGATCAAAAA  
GTAATCGGGGTGAACCGTCAGCACGTCCGGGTTCTTGCCCTCTGTGATCTCGCGGTACATCCAATCAGCT  
AGCTCGATCTCGATGTACTCCGGCGCCCGGTTTCGCTCTTTACGATCTTGTAGCGGCTAATCAAGGCTT  
CACCTCGGATACCGTCACCAGGCGGCCGTTCTTGCCCTTCTTCTGACGTGCATGGCAACGTGCGTGGT  
GTTTAACCGAATGCAGGTTTCTACCAGGTCGTCTTTCTGCTTTCCGCCATCGGCTCGCCGGCAGAACTTG  
AGTACGTCCGCAACGTGTGGACGGAACACGCGGCCGGGCTTGTCTCCCTTCCCTTCCCGGTATCGGTTCA  
TGGATTTCGGTTAGATGGGAAACCGCCATCAGTACCAGGTCGTAATCCCACACACTGGCCATGCCGGCCGG  
CCCTGCGGAAACCTCTACGTGCGCGTCTGGAAGCTCGTAGCGGATCACCTCGCCAGCTCGTCGGTCACGC  
TTCGACAGACGGAACCGCCACGTCCATGATGCTGCGACTATCGCGGTGCCACGTATAGAGCATCG  
GAACGAAAAAATCTGGTTGCTCGTCGCCCTTGGGCGGCTTCCTAATCGACGGCGCACCGGCTGCCGGCGG  
TTGCCGGGATTCTTTGCGGATTGATCAGCGGCCGCTTGCCACGATTACCGGGGCGTGCTTCTGCCTCG  
ATGCGTTGCCGCTGGGCGGCTGCGCGGCTTCAACTTCTCCACCAGGTCATCACCCAGCGCCGCGCCGA  
TTTGTACCGGGCCGGATGGTTTGCGACCGTCAACCGGATTCTCGGGCTTGGGGGTTCCAGTGCCATTGC  
AGGGCCGGCAGACAACCCAGCCGCTTACGCTTGCCAAACCGCCGTTCTCCACACATGGGGCATTCAC

GGCGTCGGTGCCTGGTTGTTCTTGATTTTCCATGCCGCCTCCTTTAGCCGCTAAAATTCATCTACTCATT  
TATTCATTTGCTCATTACTCTGGTAGCTGCGCGATGTATTCAGATAGCAGCTCGGTAATGGTCTTGCCCT  
TGGCGTACCGCGTACATCTTCAGCTTGGTGTGATCCTCCGCCGGCAACTGAAAGTTGACCCGCTTCATGG  
CTGGCGTGTCTGCCAGGCTGGCCAACGTTGCAGCCTTGCTGCTGCGTGCCTCGGACGGCCGGCACTTAG  
CGTGTTTGTGCTTTTGCTCATTCTTCTTTACCTCATTAACCTCAAATGAGTTTTGATTTAATTTAGCGG  
CCAGCGCTGGACCTCGCGGGCAGCGTCGCCCTCGGGTTCTGATTCAAGAACGGTTGTGCCGGCGGCGGC  
AGTGCCTGGGTAGCTCAGCGCTGCGTGATACGGGACTCAAGAATGGGCAGCTCGTACCCGGCCAGCGCC  
TCGGCAACCTCACCGCCGATGCGCGTGCTTTGATCGCCCGGACACGACAAAAGCCGCTTGATAGCCTTC  
CATCCGTGACCTCAATGCGCTGCTTAACCAGCTCCACCAGGTGGCGGTGGCCCATATGTCGTAAGGGCT  
TGGCTGCACCGGAATCAGCACGAAGTCGGCTGCCTTGATCGCGGACACAGCCAAGTCCGCCCGCTGGGGC  
GCTCCGTGATCACTACGAAGTCGCGCCGGCCGATGGCCTTCACGTGCGGGTCAATCGTCGGGCGGTGCA  
TGCCGACAACGGTTAGCGGTTGATCTTCCCGCACGGCCGCCAATCGCGGGCACTGCCCTGGGGATCGGA  
ATCGACTAACAGAACATCGGCCCCGGCGAGTTGCAGGGCGCGGGCTAGATGGGTTGCGATGGTTCGTCTTG  
CCTGACCCGCCTTTCTGGTTAAGTACAGCGATAACCTTCATGCGTTCCCTTGCGTATTTGTTATTTAC  
TCATCGCATCATATACGCAGCGACCGCATGACGCAAGCTGTTTTACTCAAATACACATCACCTTTTTAGA  
CGGCGGCGCTCGGTTTCTTCAGCGGCCAAGCTGGCCGGCCAGGCCGCCAGCTTGGCATCAGACAAACCGG  
CCAGGATTTTCATGCAGCCGCACGGTTGAGACGTGCGCGGGCGGCTCGAACACGTACCCGGCCGCGATCAT  
CTCCGCCTCGATCTCTTCGGTAATGAAAAACGGTTGCTCCTGGCCGTCTGGTGCGGTTTCATGCTTGTT  
CCTCTTGGCGTTTCTTCGGCGGCCGCCAGGGCGTCGGCTCGGTCAATGCGTCCTCACGGAAGGCACC  
GCGCCGCTGGCCTCGGTGGGCGTCACTTCCTCGCTGCGCTCAAGTGC CGGTACAGGGTCGAGCGATGC  
ACGCCAAGCAGTGCAGCCGCTCTTTACGGTGCGGCCCTCCTGGTTCGATCAGCTCGCGGGCGTGCGGA  
TCTGTGCCGGGGTGAGGGTAGGGCGGGGCCAACTTCACGCCTCGGGCCTTGGCGGCCTCGCGCCCGCT  
CCGGGTGCGGTGATGATTAGGGAACGCTCGAACTCGGCAATGCCGGCGAACACGGTCAACACCATGCGG  
CCGGCCGGCGTGGTGGTGTCGGCCCACGGCTCTGCCAGGCTACGCAGGCCCGCGCCGGCCTCTGGATGC  
GCTCGGCAATGTCCAGTAGGTGCGGGTGCTGCGGGCCAGGCGGTCTAGCCTGGTCACTGTCAACAGTC  
GCCAGGGCGTAGGTGGTCAAGCATCCTGGCCAGCTCCGGGCGGTGCGCCTGGTGCCGGTGATCTTCTCG  
GAAACAGCTTGGTGCAGCCGCGCGGTGCAGTTCGGCCCGTTGGTTGGTCAAGTCTGGTTCGTGCGTGC  
TGACGCGGGCATAGCCAGCAGGCCAGCGCGGCGCTCTTGTTTCATGGCGTAATGTCTCCGGTTCTAGTC  
GCAAGTATTCTACTTTATGCGACTAAACACGCGACAAGAAAACGCCAGGAAAAGGGCAGGGCGGCAGCC  
TGTCGCGTAACCTTAGGACTTGTGCGACATGTGTTTTTCAAGACGGCTGCACTGAACGTGAGAAGCCGA  
CTGCACTATAGCAGCGGAGGGGTTGGATCAAAGTACTTTGATCCCAGGGGAACCTGTGGTTGGCATGC  
ACATACAAATGGACGAACGGATAAACCTTTTCACGCCCTTTTAAATATCCGTTATTCTAATAAACGCTCT  
TTTCTCTTAGGTTTACCCGCCAATATATCCTGTCAAACACTGATAGTTTAAACTGAAGCGGGAAACGAC  
AATCTGATCCAAGCTCAAGCTAAGCTTGAGCTCTGCATGCCTGCAGGTCCCAGATTAGCCTTTTCAATT  
TCAGAAAGAATGCTAACCCACAGATGGTTAGAGAGGCTTACGCAGCAGGTCTCATCAAGACGATCTACCC  
GAGCAATAATCTCCAGGAAATCAAATACCTTCCCAAGAAGGTTAAAGATGCAGTCAAAAGATTCAGGACT  
AACTGCATCAAGAACACAGAGAAAGATATATTTCTCAAGATCAGAAGTACTATTCCAGTATGGACGATTC  
AAGGCTTGCTTCACAAACCAAGGCAAGTAATAGAGATTGGAGTCTCTAAAAAGGTAGTTCCCACTGAATC  
AAAGGCCATGGAGTCAAAGATTCAAATAGAGGACCTAACAGAACTCGCCGTAAAGACTGGCGAACAGTTC  
ATACAGAGTCTCTTACGACTCAATGACAAGAAGAAAATCTTCGTCAACATGGTGGAGCACGACACACTTG  
TCTACTCCAAAAATATCAAAGATACAGTCTCAGAAGACCAAGGGCAATTGAGACTTTTCAACAAAGGGT  
AATATCCGGAAACCTCCTCGGATTCCATTGCCAGCTATCTGTCACTTTATTGTGAAGATAGTGGAAGG  
GAAGGTGGCTCCTACAAATGCCATCATTGCGATAAAGGAAAGGCCATCGTTGAAGATGCCTCTGCCGACA  
GTGGTCCCAAAGATGGACCCCCACCCACGAGGAGCATCGTGAAAAAGAACGTTCCAACCACGTCTTC

AAAGCAAGTGGATTGATGTGATATCTCCACTGACGTAAGGGATGACGCACAATCCCACTATCCTTCGCAA  
GACCCTTCCTCTATATAAGGAAGTTCATTTTCATTTGGAGAGAACACGGGGGACTCTAGAGGATCCAAGGA  
GATATAAGCCGCCACCATGGTGAGCAAGGGCGAGGAGCTGTTACCGGGGTGGTGCCCATCCTGGTCGAG  
CTGGACGGCGACGTAACGCGCCACAAGTTCAGCGTGTCCGGCGAGGGCGAGGGCGATGCCACCTACGGCA  
AGCTGACCCTGAAGTTCATCTGCACCACCGGCAAGCTGCCCCGTGCCCTGGCCCACCCCTCGTGACCACCCCT  
GACCTACGGCGTGCAGTGCTTCAGCCGTACCCCCGACCACATGAAGCAGCACGACTTCTTCAAGTCCGCC  
ATGCCCCAAGGCTACGTCCAGGAGCGCACCATCTTCTTCAAGGACGACGGCAACTACAAGACCCGCGCCG  
AGGTGAAGTTCGAGGGCGACACCCTGGTGAACCGCATCGAGCTGAAGGGCATCGACTTCAAGGAGGACGG  
CAACATCCTGGGGCACAAGCTGGAGTACAACCTACAACAGCCACAACGTCTATATCATGGCCGACAAGCAG  
AAGAACGGCATCAAGGTGAAGTTCAGATCCGCCACAACATCGAGGACGGCAGCGTGCAGCTCGCCGACC  
ACTACCAGCAGAACACCCCCATCGGGCGACGGCCCCGTGTGCTGCCCCGACAACCACTACCTGAGCACCCA  
GTCCGCCCTGAGCAAAGACCCCAACGAGAAGCGCGATCACATGGTCTGTGAGTTCTGTGACCGCCGCC  
GGGATCACTCTCGGCATGGACGAGCTGTACAAGGATTACGCCGAGGTCATGGATGTGTTGACAGTAGTGG  
TGTCGACCGCCGACCTCCACTTAGCCAATTTGCAGGAGGTGAAACGTGGAAGACGAAGGTCTCACGTCAG  
AAACCGGCGAGCGAGGGGTTACAAAAGTCCCAGCGAGAGAGCGCGATCTATAGCGAGACTTTTCCAGATG  
TTACCATTCCACGGAGTAGATCCCGTGGATTGGTTTCTTGATGTGCTTCGCTCTCCGTCCGTTACCAGCC  
TTGTTTCTTATGAATCTTTTGATGATACTGATTGGTTTCTGCTGGTAACGAATGGGCCGAAGGGTCGTTTTG  
ACCTCTTCCCTAATGATATCCCGCGGCCATGCTAGAGTCCGCAAAAATCACCAGTCTCTCTCTACAAATC  
TATCTCTCTCTATTTTTCTCCAGAATAATGTGTGAGTAGTTCCAGATAAGGGAATTAGGGTTCTTATAG  
GGTTTCGCTCATGTGTTGAGCATATAAGAAACCCCTTAGTATGTATTTGTATTTGTAAAATACTTCTATCA  
ATAAAATTTCTAATTCCTAAAACCAAAATCCAGTGACCTGCAGGCATGCGACGTCG

### Sequence of pH7LIC5.1.1-N4p23 (35S-GFP-N4p23)

GGGTACCCTCGAATTATCATACATGAGAATTAAGGGAGTCACGTTATGACCCCGCCGATGACGCGGGACA  
AGCCGTTTTACGTTTGGAACTGACAGAACC GCAACGTTGAAGGAGCCACTGAGCCGCGGGTTTCTGGAGT  
TTAATGAGCTAAGCACATACGTCAGAAACCATTATTGCGCGTTCAAAAAGTCGCCTAAGGTCACTATCAGC  
TAGCAAATATTTCTTGTCAAAAATGCTCCACTGACGTTCCATAAATTCCCCTCGGTATCCAATTAGAGTC  
TCATATTCACTCTCAACTCGAATCCCCCTATGAAAAAGCCTGAACTCACCGCGACGTCTGTGAGAAGT  
TTCTGATCGAAAAGTTCGACAGCGTCTCCGACCTGATGCAGCTCTCGGAGGGCGAAGAATCTCGTGCTTT  
CAGCTTCGATGTAGGAGGGCGTGATATGTCTGCGGGTAAATAGCTGCGCCGATGGTTTCTACAAAGAT  
CGTTATGTTTATCGGCACTTTGCATCGGCCGCGCTCCCATTCCGGAAGTGCTTGACATTGGGGAGTTCA  
GCGAGAGCCTGACCTATTGCATCTCCGCGCGTGACAGGGTGTCAGTTGCAAGACCTGCCTGAAACCGA  
ACTGCCCGCTGTTCTTCAGCCGGTCGCGGAGGCTATGGATGCTATCGCTGCGGCCGATCTTAGCCAGACG  
AGCGGGTTCGGCCCATTCGGACCGCAAGGAATCGGTCAATACACTACATGGCGTGATTTTCATATGCGCGA  
TTGCTGATCCCCATGTGTATCACTGGCAAACGTGTGATGGACGACACCGTCAGTGCGTCCGTGCGCGAGGC  
TCTCGATGAGCTGATGCTTTGGGCGAGGACTGCCCCGAAGTCCGGCACTCGTGACGCGGATTTCGGCTCC  
AACAATGTCTTGACGGACAATGGCCGCATAACAGCGGTCAATTGACTGGAGCGAGGCGATGTTTCGGGGATT  
CCCAATACGAGGTCGCCAACATCTTCTTCTGGAGGCCGTGGTTGGCTTGATGGAGCAGCAGACGCGCTA  
CTTCGAGCGGAGGCATCCGGAGCTTGACAGGATCGCCAAGGCTCCGGGCGTATATGCTCCGCATTGGTCTT  
GACCAACTCTATCAGAGCTTGGTTGACGGCAATTTTCGATGATGCAGCTTGGGCGCAGGGTCGATGCGACG  
CAATCGTCCGATCCGGAGCCGGGACTGTGCGGCGTACACAAAATCGCCCGCAGAAGCGCGGCCGTCTGGAC  
CGATGGCTGTGTAGAAGTACTCGCCGATAGTGAAACCGACGCCCCAGCACTCGTCCGAGGGCAAAGGAA  
TAGAGTAGATGCCGACCGAACAAGAGCTGATTTGAGAACGCCTCAGCCAGCAACTCGCGCGAGCCTAGC  
AAGGCAAAATGCGAGAGAACGGCCTTACGCTTGGTGGCACAGTTCTCGTCCACAGTTCGCTAAGCTCGCTC



GGCTGGGTGCGGGGAGGGCCGGTCGCAGTGATTGAGGAATTAATTCCTAGAGTCAAGCAGATCGTTCAA  
ACATTTGGCAATAAAGTTTCTTAAGATTGAATCCTGTTGCCGGTCTTGCGATGATTATCATATAATTTCT  
GTTGAATTACGTTAAGCATGTAATAATTAACATGTAATGCATGACGTTATTTATGAGATGGGTTTTTATG  
ATTAGAGTCCCGCAATTATACATTTAATACGCATAGAAAACAAAATATAGCGCGCAAACCTAGGATAAAT  
TATCGCGCGCGGTGTCTATGTTACTAGATCGACCGGCATGCAAGCTGATAATTCAATTCGGCGTTAA  
TTCAGTACATTAAAAACGTCCGCAATGTGTATTAAAGTTGTCTAAGCGTCAATTTGTTTACACCACAATA  
TATCCTGCCACCAGCCAGCCAACAGCTCCCCGACCGGCAGCTCGGCACAAAATCACCACCTCGATACAGGC  
AGCCCATCAGTCCGGGACGGCGTCAGCGGGAGAGCCGTTGTAAGGCGGCAGACTTTGCTCATGTTACCGA  
TGCTATTTCGGAAGAACGGCAACTAAGCTGCCGGGTTTGAAACACGGATGATCTCGCGGAGGGTAGCATGT  
TGATTGTAACGATGACAGAGCGTTGCTGCCTGTGATCAATTCGGGCACGAACCCAGTGGACATAAGCCTC  
GTTCCGTTTCGTAAGCTGTAATGCAAGTAGCGTAAGTCCGTCACGCAACTGGTCCAGAACCTTGACCGAA  
CGCAGCGGTGGTAACGGCGCAGTGGCGGTTTTTCATGGCTTCTTGTTATGACATGTTTTTTTTGGGGTACAG  
TCTATGCCTCGGGCATCCAAGCAGCAAGCGCGTTACGCCGTGGGTTCGATGTTTGATGTTATGGAGCAGCA  
ACGATGTTACGCAGCAGGGCAGTCGCCCTAAAACAAAGTTAAACATCATGGGGGAAGCGGTGATCGCCGA  
AGTATCGACTCAACTATCAGAGGTAGTTGGCGTCATCGAGCGCCATCTCGAACCGACGTTGCTGGCCGTA  
CATTTGTACGGCTCCGCAGTGGATGGCGGCCTGAAGCCACACAGTGATATTGATTTGCTGGTTACGGTGA  
CCGTAAGGCTTGATGAAACAACGCGCGAGCTTTGATCAACGACCTTTTGAAACTTCGGCTTCCCTTG  
AGAGAGCGAGATTCTCCGCGCTGTAGAAGTCACCATTGTTGTGCACGACGACATCATTCGTTGGCGTTAT  
CCAGCTAAGCGCGAACTGCAATTTGGAGAATGGCAGCGCAATGACATTCTTGACAGGTATCTTCGAGCCAG  
CCACGATCGACATTGATCTGGCTATCTTGCTGACAAAAGCAAGAGAACATAGCGTTGCCTTGGTAGGTCC  
AGCGGCGGAGGAACCTTTTGATCCGTTCTGAACAGGATCTATTTGAGGCGCTAAATGAAACCTTAACG  
CTATGGAACCTCGCCGCCCGACTGGGCTGGCGATGAGCGAAATGTAGTGCTTACGTTGTCCCGCATTTGGT  
ACAGCGCAGTAACCGGCGAAAATCGCGCCGAAGGATGTCGCTGCCGACTGGGCAATGGAGCGCCTGCCGGC  
CCAGTATCAGCCCGTCATACTTGAAGCTAGACAGGCTTATCTTGACAGAAGAAGATCGCTTGGCCTCG  
CGCGCAGATCAGTTGGAAGAATTTGTCCACTACGTGAAAGGCGAGATCACCAAGGTAGTCGGCAAATAAT  
GTCTAGCTAGAAATTCGTTCAAGCCGACGCCGCTTCGCCGGCGTTAACTCAAGCGATTAGATGCACTAAG  
CACATAATTGCTCACAGCCAAACTATCAGGTCAAGTCTGCTTTTATTATTTTTAAGCGTGCATAATAAGC  
CCTACACAAATTGGGAGATATATCATGCATGACCAAAATCCCTTAACGTGAGTTTTTCGTTCCACTGAGCG  
TCAGACCCCGTAGAAAAGATCAAAGGATCTTCTTGAGATCCTTTTTTTCTGCGCGTAATCTGCTGCTTGC  
AAACAAAAAACCACCGCTACCAGCGGTGGTTTTGTTTGCCGGATCAAGAGCTACCAACTCTTTTTCCGAA  
GGTAACTGGCTTCAGCAGAGCGCAGATACCAAATACTGTCTTCTAGTGTAGCCGTAGTTAGGCCACCAC  
TTCAAGAACTCTGTAGCACCGCCTACATACCTCGCTCTGCTAATCCTGTTACCAGTGGCTGCTGCCAGTG  
GCGATAAGTCGTGTCTTACCGGTTGGACTCAAGACGATAGTTACCGGATAAGGCGCAGCGGTCCGGGCTG  
AACGGGGGGTTCTGTGCACACAGCCCAGCTTGGAGCGAACGACCTACACCGAACTGAGATACCTACAGCGT  
GAGCTATGAGAAAGCGCCACGCTTCCCGAAGGGAGAAAGGCGGACAGGTATCCGGTAAGCGGCAGGGTCG  
GAACAGGAGAGCGCACGAGGGAGCTTCCAGGGGGAAACGCCTGGTATCTTTATAGTCCTGTCGGGTTTCG  
CCACCTCTGACTTGAGCGTCGATTTTTGTGATGCTCGTCAGGGGGCGGAGCCTATGAAAAACGCCAGC  
AACGCGGCCTTTTTACGGTTCTTGCCCTTTTGCTGGCCTTTTGCTCACATGTTCTTTCTGCGTTATCCC  
CTGATTCTGTGGATAACCGTATTACCGCCTTTGAGTGAGCTGATACCGCTCGCCGACCCGAACGACCGA  
GCGCAGCGAGTCAGTGAGCGAGGAAGCGGAAGAGCGCCTGATGCGGTATTTTCTCCTTACGCATCTGTGC  
GGTATTTACACCGCATATGGTGCACCTCAGTACAATCTGCTCTGATGCCGCATAGTTAAGCCAGTATA  
CACTCCGCTATCGCTACGTGACTGGGTGATGGCTGCGCCCCGACACCCGCCAACACCCGCTGACGCGCCC  
TGACGGGCTTGTCTGCTCCCGGCATCCGCTTACAGACAAAGCTGTGACCGTCTCCGGGAGCTGCATGTGTC  
AGAGGTTTTACCGTCATACCGAAACGCGCGAGGCAGGGTGCCTTGATGTGGGCGCCGGCGGTGAGTG

GCGACGGCGGGCTTGTCGCGCCCTGGTAGATTGCCTGGCCGTAGGCCAGCCATTTTTGAGCGGCCAGC  
GGCCGCGATAGGCCGACGCGAAGCGCGGGGCGTAGGGAGCGCAGCGACCGAAGGGTAGGCGCTTTTTGC  
AGCTCTTCGGCTGTGCGCTGGCCAGACGTTATGCACAGGCCAGGCGGGTTTTAAGAGTTTTAATAAGTT  
TTAAAGAGTTTTAGGCGGAAAAATCGCCTTTTTTCTCTTTATATCAGTCACTTACATGTGTGACCGGTT  
CCCAATGTACGGCTTTGGGTTCCTAATGTACGGGTTCCGGTTCCCAATGTACGGCTTTGGGTTCCTAATG  
TACGTGCTATCCACAGGAAAGAGACCTTTTCGACCTTTTCCCCTGCTAGGGCAATTTGCCCTAGCATCT  
GCTCCGTACATTAGGAACCGGCGGATGCTTCGCCCTCGATCAGGTTGCGGTAGCGCATGACTAGGATCGG  
GCCAGCCTGCCCCGCTCCTCCTTCAAATCGTACTCCGGCAGGTCAATTTGACCCGATCAGCTTGCGCACG  
GTGAAACAGAACTTCTTGAACCTCTCCGGCGCTGCCACTGCGTTCGTAGATCGTCTTGAACAACCATCTGG  
CTTCTGCCTTGCTGCGCGCGGGCGTGCCAGGCGGTAGAGAAAACGGCCGATGCCGGGATCGATCAAAAA  
GTAATCGGGGTGAACCGTCAGCACGTCCGGGTCTTGCCCTTCTGTGATCTCGCGGTACATCCAATCAGCT  
AGCTCGATCTCGATGTACTCCGGCCGCCCGGTTTCGCTCTTTACGATCTTGTAGCGGCTAATCAAGGCTT  
CACCTCGGATACCGTCACCAGGCGGCCGTTCTTGCCCTTCTTCGTACGCTGCATGGCAACGTGCGTGGT  
GTTTAACCGAATGCAGGTTCTACCAGTCTGCTTTTCTGCTTTCCGCCATCGGCTCGCCGGCAGAACTTG  
AGTACGTCCGCAACGTGTGGACGGAACACGCGGCCGGGCTTGTCTCCCTTCCCTTCCCGGTATCGGTTCA  
TGGATTTCGGTTAGATGGGAAACCGCCATCAGTACCAGGTCGTAATCCCACACACTGGCCATGCCGGCCGG  
CCCTGCGGAAACCTCTACGTGCCCCTCTGGAAGCTCGTAGCGGATCACCTCGCCAGCTCGTCGGTCACGC  
TTTCGACAGACGGAACCGGCCACGTCCATGATGCTGCGACTATCGCGGGTGCCACGTATAGAGCATCG  
GAACGAAAAAATCTGGTTGCTCGTCGCCCTTGGGCGGCTTCCTAATCGACGGCGCACCGGCTGCCGGCGG  
TTGCCGGGATTCTTTGCGGATTTCGATCAGCGGCCGCTTGCCACGATTCACCGGGGCGTGCTTCTGCCTCG  
ATGCGTTGCCGCTGGGCGGCCCTGCGCGGCCCTTCAACTTCTCCACCAGGTCATCACCCAGCGCCGCGCCGA  
TTTGTACCGGGCCGGATGGTTTTCGACCGTCACGCCGATTCCTCGGGCTTGGGGGTTCCAGTGCCATTGC  
AGGGCCGGCAGACAACCCAGCCGCTTACGCCTGGCCAACCGCCCGTTCTCCACACATGGGGCATTCAC  
GGCGTCGGTGCTGTTTGTCTTGTATTTCCATGCCGCCCTCCTTTAGCCGCTAAAATTCATCTACTCATT  
TATTCAATTTGCTCATTTACTCTGGTAGCTGCGCGATGTATTAGATAGCAGCTCGGTAATGGTCTTGCCCT  
TGGCGTACCGCGTACATCTTACGCTTGGTGTGATCCTCCGCCGGCAACTGAAAGTTGACCCGCTTCATGG  
CTGGCGTGCTGCCAGGCTGGCCAACGTTCGAGCCTTGCTGCTGCGTGCGCTCGGACGGCCGGCACTTAG  
CGTGTTTGTGCTTTTGCTCATTTTCTCTTTACCTCATTAACCTCAAATGAGTTTTGATTTAATTTACGCGG  
CCAGCGCCTGGACCTCGCGGGCAGCGTCGCCCTCGGGTTCTGATTCAAGAACGGTTGTGCCGGCGGGCGG  
AGTGCTTGGGTAGCTCACGCGCTGCGTGATACGGGACTCAAGAATGGGCAGCTCGTACCCGGCCAGCGCC  
TCGGCAACCTCACCGCCGATGCGCGTGCCCTTTGATCGCCCGGACACGACAAAAGGCCGCTTGATAGCCTTC  
CATCCGTGACCTCAATGCGCTGCTTAACCAGCTCCACCAGGTCGGCGGTGGCCCATATGTCGTAAGGGCT  
TGGCTGCACCGGAATCAGCACGAAGTCGGCTGCCTTGATCGCGGACACAGCCAAGTCCGCCGCTGGGGC  
GCTCCGTGATCACTACGAAGTCGCGCCGGCCGATGGCCTTCACGTGCGGGTCAATCGTCGGGCGGTGCA  
TGCCGACAACGGTTAGCGGTTGATCTTCCCGCACGGCCGCCAATCGCGGGCACTGCCCTGGGGATCGGA  
ATCGACTAACAGAACATCGGCCCCGGCGAGTTGCAGGGCGCGGGCTAGATGGGTTGCGATGGTCTGCTTG  
CCTGACCCGCCTTTCTGGTTAAGTACAGCGATAACCTTCATGCGTTCCCTTGCGTATTTGTTTATTAC  
TCATCGCATCATATACGACGACCGCATGACGCAAGCTGTTTTACTCAAATACACATCACCTTTTTAGA  
CGGCGGCGCTCGGTTTCTTCAGCGGCCAAGCTGGCCGGCCAGGCCGCCAGCTTGGCATCAGACAAACCGG  
CCAGGATTTTCATGCAGCCGACGGTTGAGACGTGCGCGGGCGGCTCGAACACGTACCCGGCCGCGATCAT  
CTCCGCTCGATCTCTTCGGTAATGAAAAACGGTTTCGTCTGGCCGTCTGGTGCGGTTTCATGCTTGTT  
CCTCTTGCGGTTTCAATCTCGGCGGCCGCCAGGGCGTCGGCTCGGTCAATGCGTCCTCACGGAAGGCACC  
GCGCCGCTGGCCTCGGTGGGCGTCACTTCCTCGCTGCGCTCAAGTGCAGGTCAGGGTCGAGCGATGC  
ACGCCAAGCAGTGCAGCCGCTCTTTCACGGTGCGGCCCTTCCTGGTCGATCAGCTCGCGGGCGTGCGCGA

TCTGTGCCGGGTGAGGGTAGGGCGGGGCCAAACTTCACGCCTCGGGCCTTGGCGGCCTCGCGCCCGCT  
CCGGGTGCGGTTCGATGATTAGGGAACGCTCGAACTCGGCAATGCCGGCGAACACGGTCAACACCATGCGG  
CCGGCCGGCGTGGTGGTGTGCGGCCACGGCTCTGCCAGGCTACGCAGGCCCGCGCCGGCCCTCTGGATGC  
GCTCGGCAATGTCCAGTAGGTGCGGGGTGCTGCGGGCCAGGCGGTCTAGCCTGGTCACTGTACAACGTC  
GCCAGGGCGTAGGTGGTCAAGCATCCTGGCCAGCTCCGGGCGGTGCGGCCTGGTGCCGGTGATCTTCTCG  
GAAAACAGCTTGGTGACGCCGGCCGGTGCAGTTCGGCCCGTTGGTTGGTCAAGTCCTGGTCGTGCGTGC  
TGACGCGGGCATAGCCCAGCAGGCCAGCGCGGCGCTCTTGTTTCATGGCGTAATGTCTCCGGTTCTAGTC  
GCAAGTATTCTACTTTATGCGACTAAAACACGCGACAAGAAAACGCCAGGAAAAGGGCAGGGCGGCAGCC  
TGTCGCGTAACCTTAGGACTTGTGCGACATGTCGTTTTTCAAGACGGCTGCACTGAACGTCAGAAGCCGA  
CTGCACTATAGCAGCGAGGGGTGGATCAAAGTACTTTGATCCCGAGGGGAACCCTGTGGTTGGCATGC  
ACATACAAATGGACGAACGGATAAACCTTTTACGCCCTTTTAAATATCCGTTATTCTAATAAACGCTCT  
TTTCTCTTAGGTTTACCCGCCAATATATCCTGTCAAACACTGATAGTTTAACTGAAGCGGGAAACGAC  
AATCTGATCCAAGCTCAAGCTAAGCTTGAGCTCTGCATGCCTGCAGGTCCCCAGATTAGCCTTTTCAATT  
TCAGAAAGAATGCTAACCACAGATGGTTAGAGAGGCTTACGCAGCAGGTCTCATCAAGACGATCTACCC  
GAGCAATAATCTCCAGGAAATCAAATACCTTCCCAAGAAGGTTAAAGATGCAGTCAAAAGATTCAGGACT  
AACTGCATCAAGAACACAGAGAAAGATATATTTCTCAAGATCAGAAGTACTATTCCAGTATGGACGATTC  
AAGGCTTGCTTCACAAACCAAGGCAAGTAATAGAGATTGGAGTCTCTAAAAAGGTAGTTCCCACTGAATC  
AAAGGCCATGGAGTCAAAGATTCAAATAGAGGACCTAACAGAACTCGCCGTAAAGACTGGCGAACAGTTC  
ATACAGAGTCTCTTACGACTCAATGACAAGAAGAAAATCTTCGTCAACATGGTGGAGCACGACACACTTG  
TCTACTCCAAAAATATCAAAGATACAGTCTCAGAAGACCAAAGGGCAATTGAGACTTTTCAACAAAGGT  
AATATCCGGAAACCTCCTCGGATTCCATTGCCAGCTATCTGTCACTTTATTGTGAAGATAGTGGAAAAG  
GAAGGTGGCTCCTACAAATGCCATCATTGCGATAAAGGAAAGGCCATCGTTGAAGATGCCTCTGCCGACA  
GTGGTCCCAAGATGGACCCCCACCCAGGAGCATCGTGGAAGAAAGACGTTCCAACCACGTCTTC  
AAAGCAAGTGATTGATGTGATATCTCCACTGACGTAAGGGATGACGCACAATCCCACTATCCTTCGCAA  
GACCTTCTCTATATAAGGAAGTTCATTTTCAATTTGGAGAGAACACGGGGGACTCTAGAGGATCCAAGGA  
GATATAAGCCGCCACCATGGTGAGCAAGGGCGAGGAGCTGTTACCGGGGTGGTGCCATCCTGGTCGAG  
CTGGACGGCGACGTAAACGGCCACAAGTTCAGCGTGTCCGGCGAGGGCGAGGGCGATGCCACCTACGGCA  
AGCTGACCCTGAAGTTCATCTGCACCACCGGCAAGCTGCCCCTGCCCTGGCCACCCTCGTGACCACCT  
GACCTACGGCGTGAGTGCTTCAGCCGCTACCCCGACCACATGAAGCAGCACGACTTCTTCAAGTCCGCC  
ATGCCCCAAGGCTACGTCCAGGAGCGCACCATCTTCTTCAAGGACGACGGCAACTACAAGACCCGCGCCG  
AGGTGAAGTTCGAGGGCGACACCCTGGTGAACCGCATCGAGCTGAAGGGCATCGACTTCAAGGAGGACGG  
CAACATCCTGGGGCACAAGCTGGAGTACAACACTACAACAGCCACAACGTCTATATCATGGCCGACAAGCAG  
AAGAACGGCATCAAGGTGAAGTTCAGATCCGCCACAACATCGAGGACGGCAGCGTGCAGCTCGCCGACC  
ACTACCAGCAGAACACCCCCATCGGCGACGGCCCCGTGCTGCTGCCCACAACCACTACCTGAGCACCCA  
GTCCGCCCTGAGCAAAGACCCCAACGAGAAGCGCGATCACATGGTCTGCTGGAGTTCGTGACCGCCGCC  
GGGATCACTCTCGGCATGGACGAGCTGTACAAGGATTACGCCGAGGTCATGGATGATACTAGCGGACAAA  
CTTTCGTTTCTGTGAACCTTTCTGACGAAAGCAACACGGCAAGCACTAAAGTTGAAAACGTAAATCGGA  
AGCGGATCGCTTGAGTTTTTACGTAAAATGAATCCCTTTATTGTTGACGCTCTGGTGCAGAAAACCAAT  
TATCAGGGTGCTCGCTTTCGCGCAAGAATAATAGGAGTGTGCGTGGATTGTGGTAGAAAACACGACAAGG  
CGCTCAAGACTGAACGTAAGTGAAGGTCAACAACACGCAATCTCAGAACGAGGTGGCGCATATGTTGAT  
GCACGATCCCGTTAAGTATTTGAACAAAAGAAAGGCTAGAGCCTTTTCTAACGCAGAGATGTTTGCATT  
GAACTGGTTTCGTACACCAAGGAAAGGCAATTGGCGGTGATTTAGCCGCTGAAAGGGAGAAGACGAGAC  
TGGCTCGTAGACACCAATACGTTCTCCGGAAGAACTCCGGAACATTATAAATTCGGTATGACTGCTAA  
GGCAATGTTACCGGACATCAACGCCGTAGACGTTGGTGATAACGAGGAACTTCGTGCGAGTACCCAGTG

AGTCTGAGTGTTTCTGGCGGAGTTCTCCGTGAACACCACTTCATCTGACCTCTTCCCTAATGATATCCCG  
CGGCCATGCTAGAGTCCGCAAAAATCACCAGTCTCTCTCTACAAATCTATCTCTCTATTTTTCTCCAG  
ATAATGTGTGAGTAGTTCCCAGATAAGGGAATTAGGGTTCTTATAGGGTTTCGCTCATGTGTTGAGCAT  
ATAAGAAACCTTAGTATGTATTTGTATTTGTAAAATACTTCTATCAATAAAATTTCTAATTCCTAAAC  
CAAAATCCAGTGACCTGCAGGCATGCGACGTCG

### **Sequence of pH7LIC5.1.1-N4T36 (35S-GFP-N4T36)**

GGGTACCTCGAATTATCATACATGAGAATTAAGGGAGTCACGTTATGACCCCGCCGATGACGCGGGACA  
AGCCGTTTTACGTTTGGAACTGACAGAACC GCAACGTTGAAGGAGCCACTGAGCCGCGGGTTTCTGGAGT  
TTAATGAGCTAAGCACATACGT CAGAAACCATTATTGCGCGTTCAAAGTCGCCTAAGGTCACTATCAGC  
TAGCAAATATTTCTTGTCAAAAATGCTCCACTGACGTTCCATAAATTCCTCGGTATCCAATTAGAGTC  
TCATATTCACTCTCAACTCGAATCCCCCTATGAAAAAGCCTGAACTCACCGCGACGTCTGTCGAGAAGT  
TTCTGATCGAAAAGTTCGACAGCGTCTCCGACCTGATGCAGCTCTCGGAGGGCGAAGAATCTCGTGCTTT  
CAGCTTCGATGTAGGAGGGCGTGGATATGTCTGCGGGTAAATAGCTGCGCCGATGGTTTCTACAAAGAT  
CGTTATGTTTATCGGCACCTTTCATCGGCCGCGCTCCCGATTCCGGAAGTGCTTGACATTGGGGAGTTCA  
GCGAGAGCCTGACCTATTGCATCTCCCGCCGTGCACAGGGTGTCACGTTGCAAGACCTGCCTGAAACCGA  
ACTGCCGCTGTTCTTCAGCCGGTCGCGGAGGCTATGGATGCTATCGCTGCGGCCGATCTTAGCCAGACG  
AGCGGGTTCGGCCCATTCGGACCGCAAGGAATCGGTCAATACTACATGGCGTGATTTTCATATGCGCGA  
TTGCTGATCCCCATGTGTATCACTGGCAAACGTGTGATGGACGACACCGTCAGTGCGTCCGTCGCGCAGGC  
TCTCGATGAGCTGATGCTTTGGGCGAGGACTGCCCGAAGTCCGGCACTCGTGACGCGGATTCGGCTCC  
AACAATGTCTGACGGACAATGGCCGCATAACAGCGGTCAATTGACTGGAGCGAGGCGATGTTGGGGATT  
CCCAATACGAGGTCGCCAACATCTTCTTCTGGAGGCCGTGGTTGGCTTGATGGAGCAGCAGACGCGCTA  
CTTCGAGCGGAGGCATCCGGAGCTTGCAAGGATCGCCAAGGCTCCGGGCGTATATGCTCCGCATTGGTCTT  
GACCAACTCTATCAGAGCTTGGTTGACGGCAATTTTCGATGATGCAGCTTGGGCGCAGGGTCGATGCGACG  
CAATCGTCCGATCCGGAGCCGGGACTGTCGGGCGTACACAAATCGCCCGCAGAAGCGCGGCGCTGAGAC  
CGATGGCTGTGTAGAACTACTCGCCGATAGTGGAACCGACGCCCCAGCACTCGTCCGAGGGCAAAGGAA  
TAGAGTAGATGCCGACCGAACAAGAGCTGATTTGAGAACGCCTCAGCCAGCAACTCGCGCGAGCCTAGC  
AAGGCAAATGCGAGAGAACGGCCTTACGCTTGGTGGCACAGTTCTCGTCCACAGTTCGTAAGCTCGCTC  
GGCTGGGTGCGGGAGGGCCGGTCGCAGTGATT CAGGAATTAATTCCTAGAGTCAAGCAGATCGTTCAA  
ACATTTGGCAATAAAGTTTCTTAAGATTGAATCCTGTTGCCGGTCTTGCGATGATTATCATATAATTTCT  
GTTGAATTACGTTAAGCATGTAATAATTAACATGTAATGCATGACGTTATTTATGAGATGGGTTTTTATG  
ATTAGAGTCCCGCAATTATACATTTAATACGCGATAGAAAACAAAATATAGCGCGCAAAC TAGGATAAAT  
TATCGCGCGCGGTGTATCTATGTTACTAGATCGACCGCATGCAAGCTGATAATTC AATTCGGCGTTAA  
TTCAGTACATTAAAAACGTCCGCAATGTGTATTAAAGTTGTCTAAGCGTCAATTTGTTTACACCACAATA  
TATCCTGCCACCAGCCAGCCAACAGCTCCCCGACCGGCAGCTCGGCACAAAATCACC ACTCGATACAGGC  
AGCCCATCAGTCCGGGACGGCGTCAGCGGGAGAGCCGTTGTAAGGCGGCAGACTTTGCTCATGTTACCGA  
TGCTATTCCGAAGAACGGCAACTAAGCTGCCGGGTTTGAAACACGGATGATCTCGCGGAGGGTAGCATGT  
TGATTGTAACGATGACAGAGCGTTGCTGCCTGTGATCAATTCGGGCACGAACCCAGTGGACATAAGCCTC  
GTTGCGTTCGTAAGCTGTAATGCAAGTAGCGTAACTGCCGTACGCAACTGGTCCAGAACCTTGACCGAA  
CGCAGCGGTGGTAACGGCGCAGTGGCGGTTTTTCATGGCTTCTTGTTATGACATGTTTTTTTTGGGGTACAG  
TCTATGCCTCGGGCATCCAAGCAGCAAGCGGTTACGCCGTGGGTCGATGTTTGATGTTATGGAGCAGCA  
ACGATGTTACGCAGCAGGGCAGTCGCCCTAAAACAAAGTTAAACATCATGGGGGAAGCGGTGATCGCCGA  
AGTATCGACTCAACTATCAGAGGTAGTTGGCGTCATCGAGCGCCATCTCGAACCGACGTTGCTGGCCGTA  
CATTTGTACGGCTCCGCAGTGGATGGCGGCCTGAAGCCACACAGTGATATTGATTTGCTGGTTACGGTGA

CCGTAAGGCTTGATGAAACAACGCGGCGAGCTTTGATCAACGACCTTTTGAAACTTCGGCTTCCCCTGG  
AGAGAGCGAGATTCTCCGCGCTGTAGAAGTCACCATTGTTGTGCACGACGACATCATTCCGTGGCGTTAT  
CCAGCTAAGCGCGAACTGCAATTTGGAGAATGGCAGCGCAATGACATTCTTGCAGGTATCTTCGAGCCAG  
CCACGATCGACATTGATCTGGCTATCTTGTCTGACAAAAGCAAGAGAACATAGCGTTGCCTTGGTAGGTCC  
AGCGGCGGAGGAACCTCTTGTATCCGTTCTCTGAACAGGATCTATTTGAGGCGCTAAATGAAACCTTAACG  
CTATGGAACCTCGCCGCCGACTGGGCTGGCGATGAGCGAAATGTAGTGCTTACGTTGTCCCGCATTTGGT  
ACAGCGCAGTAACCGGCAAAATCGCGCCGAAGGATGTCGCTGCCGACTGGGCAATGGAGCGCCTGCCGGC  
CCAGTATCAGCCCGTCATACTTGAAGCTAGACAGGCTTATCTTGGACAAGAAGAAGATCGCTTGGCCTCG  
CGCGCAGATCAGTTGGAAGAATTTGTCCACTACGTGAAAGGCGAGATCACCAAGGTAGTCGGCAAATAAT  
GTCTAGCTAGAAATTCGTTCAAGCCGACGCCGCTTCGCCGGCGTTAACTCAAGCGATTAGATGCACTAAG  
CACATAATTGCTCACAGCCAACTATCAGGTCAAGTCTGCTTTTATTATTTTAAAGCGTGCATAATAAGC  
CCTACACAAATTGGGAGATATATCATGCATGACCAAAATCCCTTAACGTGAGTTTTCTGTTCCACTGAGCG  
TCAGACCCCGTAGAAAAGATCAAAGGATCTTCTTGAGATCCTTTTTTCTGCGCGTAATCTGCTGCTTGC  
AAACAAAAAAACCACCGCTACCAGCGGTGGTTTGTTCGCCGATCAAGAGCTACCAACTCTTTTTCCGAA  
GGTAACTGGCTTCAGCAGAGCGCAGATACCAAATACTGTCTTCTAGTGTAGCCGTAGTTAGGCCACCAC  
TTCAAGAACTCTGTAGCACCGCCTACATACCTCGCTCTGCTAATCCTGTTACCAGTGGCTGCTGCCAGTG  
GCGATAAGTCGTGTCTTACCGGGTTGGACTCAAGACGATAGTTACCGGATAAGGCGCAGCGGTGCGGCTG  
AACGGGGGGTTCTGTGCACACAGCCAGCTTGGAGCGAACGACCTACACCGAACTGAGATACCTACAGCGT  
GAGCTATGAGAAAGCGCCACGCTTCCCGAAGGGAGAAAGGCGGACAGGTATCCGGTAAGCGGCAGGGTCG  
GAACAGGAGAGCGCACGAGGGAGCTTCCAGGGGGAACGCCTGGTATCTTTATAGTCCTGTCGGGTTTCG  
CCACCTCTGACTTGAGCGTCGATTTTTGTGATGCTCGTCAGGGGGCGGAGCCTATGGA AAAACGCCAGC  
AACGCGGCCTTTTTACGGTTCCTGGCCTTTTGCTGGCCTTTTGCTCACATGTTCTTTCTGCGTTATCCC  
CTGATTCTGTGGATAACCGTATTACCGCCTTTGAGTGAGCTGATACCGCTCGCCGCAGCCGAACGACCGA  
GCGCAGCGAGTCAGTGAGCGAGGAAGCGGAAGAGCGCCTGATGCGGTATTTCTCCTTACGCATCTGTGC  
GGTATTTACACCCGCATATGGTGCACTCTCAGTACAATCTGCTCTGATGCCGCATAGTTAAGCCAGTATA  
CACTCCGCTATCGCTACGTGACTGGGTCATGGCTGCGCCCCGACACCCGCCAACACCCGCTGACGCGCCC  
TGACGGGCTTGTCTGCTCCCGCATCCGCTTACAGACAAGCTGTGACCGTCTCCGGGAGCTGCATGTGTC  
AGAGGTTTTACCGTCAACCGAAACGCGCAGGCAGGGTGCCTTGATGTGGGCGCCGGCGGTGAGTG  
GCGACGGCGCGGCTTGTCGCGCCCTGGTAGATTGCCTGGCCGTAGGCCAGCCATTTTTGAGCGGCCAGC  
GGCCGCGATAGGCCGACGCGAAGCGCGGGGCGTAGGGAGCGCAGCGACCGAAGGGTAGGCGCTTTTTGC  
AGCTCTTCGGCTGTGCGCTGGCCAGACAGTTATGCACAGGCCAGGCGGGTTTTAAGAGTTTTAATAAGTT  
TTAAAGAGTTTTAGGCGGAAAAATCGCCTTTTTTCTCTTTTATATCAGTCACTTACATGTGTGACCGGTT  
CCCAATGTACGGCTTTGGGTTCCCAATGTACGGGTTCGGGTTCCCAATGTACGGCTTTGGGTTCCCAATG  
TACGTGCTATCCACAGGAAAGAGACCTTTTCGACCTTTTCCCCTGCTAGGGCAATTTGCCCTAGCATCT  
GCTCCGTACATTAGGAACCGCGGATGCTTCGCCCTCGATCAGGTTGCGGTAGCGCATGACTAGGATCGG  
GCCAGCCTGCCCCGCTCCTCCTTCAAATCGTACTCCGGCAGGTCAATTTGACCCGATCAGCTTGCGCACG  
GTGAAACAGA ACTTCTTGA ACTCTCCGGCGCTGCCACTGCGTTCTGTAGATCGTCTTGAACAACCATCTGG  
CTTCTGCCTTGCTGCGCGCGGCGTGCCAGGCGGTAGAGAAAACGGCCGATGCCGGGATCGATCAAAAA  
GTAATCGGGGTGAACCGTCAGCACGTCCGGGTCTTGCCTTCTGTGATCTCGCGGTACATCCAATCAGCT  
AGCTCGATCTCGATGTACTCCGGCCGCCGGTTTTCGCTCTTTACGATCTTGTAGCGGCTAATCAAGGCTT  
CACCTCGGATACCGTCACCAGGCGGCCGTTCTTGGCCTTCTTCGTACGCTGCATGGCAACGTGCGTGGT  
GTTTAACCGAATGCAGTTTCTACCAGGTGCTCTTCTGCTTTCCGCCATCGGCTCGCCGGCAGAACTTG  
AGTACGTCCGCAACGTGTGGACGGAACACGCGGCCGGGCTTGTCTCCCTTCCCTTCCGGTATCGGTTCA  
TGGATTGCGTTAGATGGGAAACCGCCATCAGTACCAGGTCGTAATCCACACACTGGCCATGCCGGCCGG

CCCTGCGGAAACCTCTACGTGCCCGTCTGGAAGCTCGTAGCGGATCACCTCGCCAGCTCGTCGGTCACGC  
TTCGACAGACGGAAAACGGCCACGTCCATGATGCTGCGACTATCGCGGGTGCCACGTCATAGAGCATCG  
GAACGAAAAAATCTGGTTGCTCGTCGCCCTTGGGCGGCTTCCTAATCGACGGCGCACCGGCTGCCGGCGG  
TTGCCGGGATTCTTTGCGGATTGCATCAGCGGCCGCTTGCCACGATTACCGGGGCGTGCTTCTGCCTCG  
ATGCGTTGCCGCTGGGCGGCTGCGCGGCTTCAACTTCTCCACCAGGTCATCACCCAGCGCCGCGCCGA  
TTTGTACCGGGCCGGATGGTTTGCGACCGTCACGCCGATTCTCGGGCTTGGGGGTTCAGTGCCATTGC  
AGGGCCGGCAGACAACCCAGCCGCTTACGCTTGCCAAACGCCCCGTTCTCCACACATGGGGCATTCAC  
GGCGTCGGTGCTGGTTGTTCTTGATTTTCCATGCCGCTCCTTTAGCCGCTAAAATTCATCTACTCATT  
TATTCATTTGCTCATTTACTCTGGTAGCTGCGCGATGTATTTCAGATAGCAGCTCGGTAATGGTCTTGCCCT  
TGGCGTACCGGTACATCTTCAGCTTGGTGTGATCCTCCGCCGCAACTGAAAGTTGACCCGCTTCATGG  
CTGGCGTGTCTGCCAGGCTGGCCAACTGTCAGCCTTGCTGCTGCGTGCCTCGGACGGCCGGCACTTAG  
CGTGTTTGTGCTTTTGTCTATTTTCTCTTACCTCATTAACCTCAAATGAGTTTGTATTTAATTTACGCGG  
CCAGCGCTTGGACCTCGCGGGCAGCGTCGCCCTCGGGTTCTGATTCAAGAACGGTTGTGCCGGCGGCGGC  
AGTGCCTGGGTAGCTCAGCGCTGCGTGATACGGGACTCAAGAATGGGCAGCTCGTACCCGGCCAGCGCC  
TCGGCAACCTCACCGCCGATGCGCGTGCCTTTGATCGCCCGCGACACGACAAAGCCGCTTGTAGCCTTC  
CATCCGTGACCTCAATGCGCTGCTTAACCAGCTCCACCAGGTCGGCGGTGGCCCATATGTTCGTAAGGGCT  
TGGCTGCACCGGAATCAGCACGAAGTCGGCTGCCTTGATCGCGGACACAGCCAAGTCCGCCGCTTGGGGC  
GCTCCGTGATCACTACGAAGTCGCGCCGGCCGATGGCCTTCACGTGCGGGTCAATCGTCGGGCGGTGCA  
TGCCGACAACGGTTAGCGGTTGATCTTCCCGCACGGCCGCCAATCGCGGGCACTGCCCTGGGGATCGGA  
ATCGACTAACAGAACATCGGCCCCGGCGAGTTGCAGGGCGCGGGCTAGATGGGTTCGATGGTTCGTCTTG  
CCTGACCCGCTTTCTGGTTAAGTACAGCGATAACCTTCATGCGTTCCCTTGCGTATTTGTTTATTTAC  
TCATCGCATCATATACGCAGCGACCGCATGACGCAAGCTGTTTTACTCAAATACACATCACCTTTTTAGA  
CGGCGGCGCTCGGTTTCTTCAGCGGCCAAGCTGGCCGGCCAGGCCGCCAGCTTGGCATCAGACAAACCGG  
CCAGGATTTTCATGCAGCCGCACGGTTGAGACGTGCGCGGGCGGCTCGAACACGTACCCGGCCGCGATCAT  
CTCCGCTCGATCTCTTCGGTAATGAAAAACGGTTTCGTCTGGCCGTCCTGGTGCGGTTTCATGCTTGTT  
CCTCTTGGCGTTCATTCTCGGCGGCCGCCAGGGCGTCGGCTCGGTCAATGCGTCCTCACGGAAGGCACC  
GCGCCGCTGGCCTCGGTGGGCGTCACTTCCTCGCTGCGCTCAAGTGCAGGTACAGGGTCGAGCGATGC  
ACGCCAAGCAGTGCAGCCGCTCTTTCACGGTGCGGCCCTTCCTGGTCGATCAGCTCGCGGGCGTGCGGA  
TCTGTGCCGGGGTGAGGGTAGGGCGGGGGCCAACTTCACGCCTCGGGCCTTGGCGGCCTCGCGCCCGCT  
CCGGGTGCGGTGATGATTAGGGAACGCTCGAACTCGGCAATGCCGGCGAACACGGTCAACACCATGCGG  
CCGGCCGGCGTGTTGGTGTGCGCCACGGCTCTGCCAGGCTACGCAGGCCCGCGCCGGCCTCTGGATGC  
GCTCGGCAATGTCCAGTAGGTGCGGGTGCTGCGGGCCAGGCGGTCTAGCCTGGTCACTGTCAACACGTC  
GCCAGGGCGTAGGTGGTCAAGCATCTTGCCAGCTCCGGGCGGTGCGCCTGGTGCCGGTGATCTTCTCG  
GAAAACAGCTTGGTGCAGCCGGCCGCGTGAGTTTCGGCCCGTTGGTTGGTCAAGTCTGGTCGTGCGTGC  
TGACGCGGGCATAGCCAGCAGGCCAGCGGCGGCGCTCTTGTTTCATGGCGTAATGTCTCCGGTTCTAGTC  
GCAAGTATTCTACTTTATGCGACTAAAACACGCGACAAGAAAACGCCAGGAAAAGGGCAGGGCGGCAGCC  
TGTCGCGTAACCTTAGGACTTGTGCGACATGTGCTTTTCAGAAGACGGTGCAGTGAACGTGAGAAGCCGA  
CTGCACTATAGCAGCGAGGGGTGGATCAAAGTACTTTGATCCCAGGGGAACCCTGTGGTTGGCATGC  
ACATACAAATGGACGAACGGATAAACCTTTTCACGCCCTTTTAAATATCCGTTATTCTAATAAACGCTCT  
TTTCTCTTAGGTTTACCCGCCAATATATCCTGTCAAACACTGATAGTTTAAACTGAAGGCGGGAAACGAC  
AATCTGATCCAAGCTCAAGCTAAGCTTGAGCTCTGCATGCCTGCAGGTCCCAGATTAGCCTTTTCAATT  
TCAGAAAGAATGCTAACCCACAGATGGTTAGAGAGGCTTACGCAGCAGGTCTCATCAAGACGATCTACCC  
GAGCAATAATCTCAGGAAATCAAATACCTTCCCAAGAAGGTTAAAGATGCAGTCAAAAGATTTCAGGACT  
AACTGCATCAAGAACACAGAGAAAGATATATTTCTCAAGATCAGAAGTACTATTCCAGTATGGACGATTC

AAGGCTTGCTTCACAAACCAAGGCAAGTAATAGAGATTGGAGTCTCTAAAAAGGTAGTTCCTCACTGAATC  
AAAGGCCATGGAGTCAAAGATTCAAATAGAGGACCTAACAGAACTCGCCGTAAAGACTGGCGAACAGTTC  
ATACAGAGTCTCTTACGACTCAATGACAAGAAGAAAATCTTCGTCAACATGGTGGAGCACGACACACTTG  
TCTACTCCAAAAATATCAAAGATACAGTCTCAGAAGACCAAAGGGCAATTGAGACTTTTCAACAAAGGGT  
AATATCCGGAAACCTCCTCGGATTCCATTGCCCAGCTATCTGTCACTTTATTGTGAAGATAGTGGAAAAG  
GAAGGTGGCTCCTACAAATGCCATCATTGCGATAAAGGAAAGGCCATCGTTGAAGATGCCTCTGCCGACA  
GTGGTCCCAAAGATGGACCCCCACCCACGAGGAGCATCGTGGAAAAAGAAGACGTTCCAACCACGTCTTC  
AAAGCAAGTGATTGATGTGATATCTCCACTGACGTAAGGGATGACGCACAATCCCACTATCCTTCGCAA  
GACCTTTCCTCTATATAAGGAAGTTCATTTTCATTTGGAGAGAACACGGGGGACTCTAGAGGATCCAAGGA  
GATATAAGCCGCCACCATGGTGAGCAAGGGCGAGGAGCTGTTACCCGGGGTGGTGCCCATCCTGGTTCGAG  
CTGGACGGCGACGTAACCGGCCACAAGTTCAGCGTGTCCGGCGAGGGCGAGGGCGATGCCACCTACGGCA  
AGCTGACCCTGAAGTTCATCTGCACCACCGGCAAGCTGCCCCGTGCCCTGGCCCCACCCTCGTGACCACCCT  
GACCTACGGCGTGACGTGCTTCAGCCGCTACCCCCGACCACATGAAGCAGCACGACTTCTTCAAGTCCGCC  
ATGCCCCGAAGGCTACGTCCAGGAGCGCACCATCTTCTTCAAGGACGACGGCAACTACAAGACCCGCGCCG  
AGGTGAAGTTCGAGGGCGACACCCTGGTGAACCGCATCGAGCTGAAGGGCATCGACTTCAAGGAGGACGG  
CAACATCCTGGGGCACAAGCTGGAGTACAACATAACAGCCACAACGTCTATATCATGGCCGACAAGCAG  
AAGAACGGCATCAAGGTGAACCTTCAAGATCCGCCACAACATCGAGGACGGCAGCGTGCAGCTCGCCGACC  
ACTACCAGCAGAACACCCCCATCGGCGACGGCCCCGTGTGCTGCCCCGACAACCACTACCTGAGCACCCA  
GTCCGCCCTGAGCAAAGACCCCAACGAGAAGCGCGATCACATGGTCTGTGCTGGAGTTCGTGACCGCCGCC  
GGGATCACTCTCGGCATGGACGAGCTGTACAAGGATTACGCCGAGGTCATGGATAATACTAGCGGACAAA  
CTTTCGTCTGTGAACCTTTCTGACGAAAGCAACACAGCGACCACTGACGTCAAACCCGTGAGTTTCGGA  
AGCGGATCGCTTGATTTTTTTACAGAAAATGAATCCCATATTATTCGATGCTTTGATACGGAAGAATAGT  
TATCAGGGCGCTCGCTTTCGCGCGAGAATAATAGGAGTGTGCGTGGATTGCGGTAGAAAACACGATAAGG  
GGTTGAAGACTGAACGTAAGTGTAAAGTCAACAATACGCAGTCTCAGAACGAGGTGGCGCATATGTTAAT  
GCACGACCCCGTTAAGTATTTAAACAAAAGAAAAGCTAGAGCCTTTTCTAATGCGGAGATATTTGCGATT  
GATTTGGTTATGTACACCAAGGAAAGGCAATTGGCTATTGATTTGGCCGCTGAAAGGGAGAAAACGAGAC  
TGGCTCGTAGACACCCGATGCGTTCTCCGAAGAAACTCCGGAATATTATAAATTTCGGTAGGACTGCTAA  
AGCAATGTTACCGGACATCAACGCCGTAGACGTTGGTGATAACGAGGAACTTCGTGCGAGTATCCAGTG  
AGTCTGAGTGTTTCTGGCGGAGTTCTCCGTGAACACCACTTCATCTGACCTCTTCCCTAATGATATCCCG  
CGGCCATGCTAGAGTCCGCAAAAATCACCAGTCTCTCTCTACAAATCTATCTCTCTCTATTTTTCTCCAG  
AATAATGTGTGAGTAGTTCAGATAAGGGAATTAGGGTTCTTATAGGGTTTCGCTCATGTGTTGAGCAT  
ATAAGAAACCCTTAGTATGTATTTGTATTTGTAAATACTTCTATCAATAAAATTTCTAATTCCTAAAAC  
CAAAATCCAGTGACCTGCAGGCATGCGACGTCG

### Sequence of pH7LIC6.0 (35S-GFP-EV)

GGGTACCCTCGAATTATCATACATGAGAATTAAGGGAGTCACGTTATGACCCCGCCGATGACGCGGGACA  
AGCCGTTTTACGTTTGAACTGACAGAACCGCAACGTTGAAGGAGCCACTGAGCCGCGGGTTTTCTGGAGT  
TTAATGAGCTAAGCACATACGTGAGAAACCATTATTGCGCGTTCAAAAGTCGCCTAAGGTCATATCAGC  
TAGCAAATATTTCTGTCAAAAATGCTCCACTGACGTTCCATAAATTCCTTCGGTATCCAATTAGAGTC  
TCATATTCACTCTCAACTCGAATCCCCCTATGAAAAAGCCTGAACTCACCGCGACGTCTGTGAGAAAGT  
TTCTGATCGAAAAGTTCGACAGCGTCTCCGACCTGATGCAGCTCTCGGAGGGCGAAGAATCTCGTGCTTT  
CAGCTTCGATGTAGGAGGGCGTGGATATGTCTGCGGGTAAATAGCTGCGCCGATGGTTTCTACAAAGAT  
CGTTATGTTTATCGGCACTTTGCATCGGCCGCGCTCCCGATTCCGGAAGTGCTTGACATTGGGGAGTTCA  
GCGAGAGCCTGACCTATTGCATCTCCGCGCGTGCACAGGGTGTACGTTGCAAGACCTGCCTGAAACCGA

ACTGCCCGCTGTTCTTCAGCCGGTCGCGGAGGCTATGGATGCTATCGCTGCGGCCGATCTTAGCCAGACG  
AGCGGGTTCGGCCCATTTCGGACCGCAAGGAATCGGTCAATACACTACATGGCGTGATTTTCATATGCGCGA  
TTGCTGATCCCATGTGTATCACTGGCAAACGTGTGATGGACGACACCGTCAGTGCGTCCGTCGCGCAGGC  
TCTCGATGAGCTGATGCTTTGGGCGAGGACTGCCCCGAAGTCCGGCACTCGTGACGCGGATTTCGGCTCC  
AACAAATGTCTGACGGACAATGGCCGCATAACAGCGGTCAATTGACTGGAGCGAGGCGATGTTTCGGGGATT  
CCCAATACGAGGTCGCCAACATCTTCTTCTGGAGGCCGTGGTTGGCTTGATGGAGCAGCAGACGCGCTA  
CTTCGAGCGGAGGCATCCGGAGCTTGCAGGATCGCCAAGGCTCCGGGCGTATATGCTCCGCATTGGTCTT  
GACCAACTCTATCAGAGCTTGGTTGACGGCAATTTTCGATGATGCAGCTTGGGCGCAGGGTCGATGCGACG  
CAATCGTCCGATCCGGAGCCGGGACTGTCTGGGCGTACACAAATCGCCCGCAGAAGCGCGGCCGTCTGGAC  
CGATGGCTGTGTAGAAGTACTCGCCGATAGTGAAACCGACGCCCCAGCACTCGTCCGAGGGCAAAGGAA  
TAGAGTAGATGCCGACCGAACAAGAGCTGATTTTCGAGAACGCCTCAGCCAGCAACTCGCGCGAGCCTAGC  
AAGGCAAATGCGAGAGAACGGCCTTACGCTTGGTGGCACAGTTCTCGTCCACAGTTCGCTAAGCTCGCTC  
GGCTGGGTTCGCGGAGGGCCGGTTCGAGTGATTTCAGGAATTAATTCCTTAGAGTCAAGCAGATCGTTCAA  
ACATTTGGCAATAAAGTTTCTTAAGATTGAATCCTGTTGCCGGTCTTGCGATGATTATCATATAATTTCT  
GTTGAATTACGTTAAGCATGTAATAATTAACATGTAATGCATGACGTTATTTATGAGATGGGTTTTTATG  
ATTAGAGTCCCGCAATTATACATTTAATACGCGATAGAAAACAAAATATAGCGCGCAAACCTAGGATAAAT  
TATCGCGCGCGGTGTATCTATGTTACTAGATCGACCGCATGCAAGCTGATAATTCAATTTCGGCGTTAA  
TTCAGTACATTAAAAACGTCCGCAATGTGTTATTAAGTTGTCTAAGCGTCAATTTGTTTACACCACAATA  
TATCTGCCACCAGCCAGCCAACAGCTCCCCGACCGGCAGCTCGGCACAAAATCACCCTCGATACAGGC  
AGCCCATCAGTCCGGGACGGCGTCAGCGGGAGAGCCGTTGTAAGGCGGCAGACTTTGCTCATGTTACCGA  
TGCTATTTCGAAGAACGGCAACTAAGCTGCCGGGTTTGAACACGGATGATCTCGCGGAGGGTAGCATGT  
TGATTGTAACGATGACAGAGCGTTGCTGCCTGTGATCAATTTCGGGCACGAACCCAGTGACATAAGCCTC  
GTTCCGTTTCGTAAGCTGTAATGCAAGTAGCGTAACCTGCCGTACGCAACTGGTCCAGAACCTTGACCGAA  
CGCAGCGGTGGTAACGGCGCAGTGGCGGTTTTTCATGGCTTCTTGTTATGACATGTTTTTTTTGGGGTACAG  
TCTATGCCTCGGGCATCCAAGCAGCAAGCGGTTACGCCGTGGGTTCGATGTTTGATGTTATGGAGCAGCA  
ACGATGTTACGCAGCAGGGCAGTCGCCCTAAAACAAAGTTAAACATCATGGGGGAAGCGGTGATCGCCGA  
AGTATCGACTCAACTATCAGAGGTAGTTGGCGTCATCGAGCGCCATCTCGAACCGACGTTGCTGGCCGTA  
CATTTGTACGGCTCCGCACTGGATGGCGGCCTGAAGCCACACAGTGATATTGATTTGCTGGTTACGGTGA  
CCGTAAGGCTTGATGAAACAACGCGGCAGCTTTGATCAACGACCTTTTGAAACTTCGGCTTCCCCTGG  
AGAGAGCGAGATTCTCCGCGCTGTAGAAGTCAACATTGTTGTGCACGACGACATCATTCGGTGGCGTTAT  
CCAGCTAAGCGCGAACTGCAATTTGGAGAATGGCAGCGCAATGACATTCTTGAGGTATCTTCGAGCCAG  
CCACGATCGACATTGATCTGGCTATCTTGCTGACAAAAGCAAGAGAACATAGCGTTGCCTTGGTAGGTCC  
AGCGGCGGAGGAACTCTTTGATCCGTTCTTGAACAGGATCTATTTGAGGCGCTAAATGAAACCTTAACG  
CTATGGAACCTCGCCGCCGACTGGGCTGGCGATGAGCGAAATGTAGTGCTTACGTTGTCCCGCATTTGGT  
ACAGCGCAGTAACCGGCAAAAATCGCGCCGAAGGATGTCGCTGCCGACTGGGCAATGGAGCGCCTGCCGGC  
CCAGTATCAGCCCGTCATACTTGAAGCTAGACAGGCTTATCTTGACAGAAGAAGATCGCTTGGCCTCG  
CGCGCAGATCAGTTGGAAGAATTTGTCCACTACGTGAAAGCGGAGATCACCAGGTAGTCGGCAAATAAT  
GTCTAGCTAGAAATTCGTTCAAGCCGACGCCGCTTCGCCGGCGTTAACTCAAGCGATTAGATGCACTAAG  
CACATAATTGCTCACAGCCAACTATCAGGTCAAGTCTGCTTTTATTATTTTAAAGCGTGACATAATAAGC  
CCTACACAAATTGGGAGATATATCATGCATGACCAAAATCCCTTAACGTGAGTTTTTCGTTCCACTGAGCG  
TCAGACCCCGTAGAAAAGATCAAAGGATCTTCTTGAGATCCTTTTTTTCTGCGCGTAATCTGCTGCTTGC  
AAACAAAAAAACCACCGCTACCAGCGGTGGTTTGTGTTGCCGGATCAAGAGCTACCAACTCTTTTTCCGAA  
GGTAACTGGCTTCAGCAGAGCGCAGATACCAAATACTGTCTTCTAGTGTAGCCGTAGTTAGGCCACCAC  
TTCAAGAACTCTGTAGCACCGCTACATACCTCGCTCTGCTAATCCTGTTACCAGTGGCTGCTGCCAGTG



GC GATAAGTCGTGTCTTACCGGGTTGGACTCAAGACGATAGTTACCGGATAAGGCGCAGCGGTCTGGGCTG  
AACGGGGGGTTCTGTGCACACAGCCCAGCTTGGAGCGAACGACCTACACCGAACTGAGATACCTACAGCGT  
GAGCTATGAGAAAGCGCCACGCTTCCCCGAAGGGAGAAAGGCGGACAGGTATCCGGTAAGCGGCAGGGTCG  
GAACAGGAGAGCGCACGAGGGAGCTTCCAGGGGGAACGCCTGGTATCTTTATAGTCCTGTCTGGGTTTTCG  
CCACCTCTGACTTGAGCGTCGATTTTTGTGATGCTCGTCAGGGGGCGGAGCCTATGGAAAAACGCCAGC  
AACGCGGCCTTTTTACGGTTCTTGGCCTTTTGCTGGCCTTTTGCTCACATGTTCTTTCTGCGTTATCCC  
CTGATTCTGTGGATAACCGTATTACCGCCTTTGAGTGAGCTGATACCGCTCGCCGCAGCCGAACGACCGA  
GCGCAGCGAGTCAGTGAGCGAGGAAGCGGAAGAGCGCCTGATGCGGTATTTTCTCCTTACGCATCTGTGC  
GGTATTTTACACCGCATATGGTGCACTCTCAGTACAATCTGCTCTGATGCCGCATAGTTAAGCCAGTATA  
CACTCCGCTATCGCTACGTGACTGGGTCTGGCTGCGCCCCGACACCCGCCAACACCCGCTGACGCGCCC  
TGACGGGCTTGTCTGCTCCCGGCATCCGCTTACAGACAAGCTGTGACCGTCTCCGGGAGCTGCATGTGTC  
AGAGGTTTTACCGTCACTACCGAAACGCGCGAGGCAGGGTGCCTTGATGTGGGCGCCGGCGGTCTGAGTG  
GCGACGGCGCGGCTTGTCCGCGCCCTGGTAGATTGCCTGGCCGTAGGCCAGCCATTTTTGAGCGGCCAGC  
GGCCGCGATAGGCCGACGCGAAGCGCGGGGCGTAGGGAGCGCAGCGACCGAAGGGTAGGCGCTTTTTGCG  
AGCTCTTCGGCTGTGCGCTGGCCAGACAGTTATGCACAGGCCAGGCGGGTTTTAAGAGTTTTAATAAGTT  
TTAAAGAGTTTTAGGCGGAAAAATCGCCTTTTTTCTCTTTTATATCAGTCACTTACATGTGTGACCGGTT  
CCCAATGTACGGCTTTGGGTTCCCAATGTACGGGTTCCGCTTCCCAATGTACGGCTTTGGGTTCCCAATG  
TACGTGCTATCCACAGGAAAGAGACCTTTTCGACCTTTTCCCCTGCTAGGGCAATTTGCCCTAGCATCT  
GCTCCGTACATTAGGAACCGGCGGATGCTTCGCCCTCGATCAGGTTGCGGTAGCGCATGACTAGGATCGG  
GCCAGCCTGCCCCGCTCCTCCTTCAAATCGTACTCCGGCAGGTCAATTTGACCCGATCAGCTTGCGCACG  
GTGAAACAGAACTTCTTGAACCTCTCCGGCGCTGCCACTGCGTTCTGTAGATCGTCTTGAACAACCATCTGG  
CTTCTGCCTTGCTGCGGCGCGGCGTGCCAGGCGGTAGAGAAAACGGCCGATGCCGGGATCGATCAAAAA  
GTAATCGGGGTGAACCGTCAGCACGTCCGGGTTCTTGCCCTTCTGTGATCTCGCGGTACATCCAATCAGCT  
AGCTCGATCTCGATGTACTCCGGCCGCCGGTTTTCGCTCTTTACGATCTTGTAGCGGCTAATCAAGGCTT  
CACCTTCGGATACCGTCACCAGGCGGCCGTTCTTGCCCTTCTTCGTACGCTGCATGGCAACGTGCGTGGT  
GTTTAACCGAATGCAGGTTTCTACCAGGTCTCTTTCTGCTTTCCGCCATCGGCTCGCCGGCAGAACTTG  
AGTACGTCCGCAACGTGTGGACGGAACACGCGGCCGGGCTTGTCTCCCTTCCCTTCCCGGTATCGGTTCA  
TGGATTTCGGTTAGATGGGAAACCGCCATCAGTACCAGGTCGTAATCCCACACACTGGCCATGCCGGCCGG  
CCCTGCGGAAACCTCTACGTGCCCGTCTGGAAGCTCGTAGCGGATCACCTCGCCAGCTCGTCGGTCACGC  
TTCGACAGACGGAACCGGCCACGTCCATGATGCTGCGACTATCGCGGGTGCCACGTCTAGAGCATCG  
GAACGAAAAAATCTGGTTGCTCGTCGCCCTTGGGCGGCTTCCTAATCGACGGCGCACCGGCTGCCGGCGG  
TTGCCGGGATTCTTTGCGGATTCGATCAGCGGCCGCTTGCCACGATTACCGGGGCGTGCTTCTGCCTCG  
ATGCGTTGCCGCTGGGCGGCCTGCGCGGCTTCAACTTCTCCACCAGGTCATACCCAGCGCCGCGCCGA  
TTTGTACCGGGCCGATGGTTTTCGACCGTCACGCCGATTCCTCGGGCTTGGGGGTTCCAGTGCCATTGC  
AGGGCCGGCAGACAACCCAGCCGCTTACGCCTGGCCAACCGCCGTTCTCCACACATGGGGCATTCAC  
GGCGTCGGTGCTGGTTGTCTTGATTTTCCATGCCGCTCCTTTAGCCGCTAAAATTCATCTACTCATT  
TATTCATTTGCTCATTTACTCTGGTAGCTGCGCGATGTATTCAGATAGCAGCTCGGTAATGGTCTTGCCCT  
TGGCGTACCGGTACATCTTACGCTTGGTGTGATCTCCGCCGGCAACTGAAAGTTGACCCGCTTCATGG  
CTGGCGTGTCTGCCAGGCTGGCCAACGTTGCAGCCTTGCTGCTGCGTGCGCTCGGACGGCCGGCAGTTAG  
CGTGTTTGTGCTTTTGCTCATTTTCTCTTTACCTCATTAACCTCAAATGAGTTTTGATTTAATTTACGCGG  
CCAGCGCTTGACCTCGCGGGCAGCGTCGCCCTCGGGTTCTGATTCAAGAACGGTTGTGCCGGCGGGCGG  
AGTGCCCTGGGTAGCTCACGCGCTGCGTGATACGGGACTCAAGAATGGGCAGCTCGTACCCGGCCAGCGCC  
TCGGCAACCTCACCGCCGATGCGCGTGCCCTTGATCGCCCGGACACGACAAAGCCGCTTGTAGCCTTC  
CATCCGTGACCTCAATGCGCTGCTTAACCAGCTCCACCAGGTCGGCGGTGGCCCATATGTCGTAAGGGCT

TGGCTGCACCGGAATCAGCACGAAGTCGGCTGCCTTGATCGCGGACACAGCCAAGTCCGCCGCCTGGGGC  
GCTCCGTCGATCACTACGAAGTCGCGCCGCGCGATGGCCTTCACGTGCGGGTCAATCGTCGGGCGGTCTGA  
TGCCGACAACGGTTAGCGGTTGATCTTCCCGCACGGCCGCCAATCGCGGGCACTGCCCTGGGGATCGGA  
ATCGACTAACAGAACATCGGCCCCGGCGAGTTGCAGGGCGCGGGCTAGATGGGTTGCGATGGTCGTCTTG  
CCTGACCCGCCTTTCTGGTTAAGTACAGCGATAACCTTCATGCGTTCCCCTTGCGTATTTGTTTATTAC  
TCATCGCATCATATACGCAGCGACCGCATGACGCAAGCTGTTTTACTCAAATACACATCACCTTTTTAGA  
CGGCGGCGCTCGGTTTCTTCAGCGGCCAAGCTGGCCGGCCAGGCCGCCAGCTTGGCATCAGACAAACCGG  
CCAGGATTTTCATGCAGCCGCACGGTTGAGACGTGCGCGGGCGGCTCGAACACGTACCCGGCCGCGATCAT  
CTCCGCCTCGATCTCTTCGGTAATGAAAAACGGTTTCGTCTGGCCGTCCTGGTGCGGTTTCATGCTTGTT  
CCTCTTGCGGTTTCATTCTCGGCGGCCGCCAGGGCGTCGGCTCGGTCAATGCGTCTCACGGAAGGCACC  
GCGCCGCTGGCCTCGGTGGGCGTCACTTCCTCGCTGCGCTCAAGTGC CGGTACAGGGTCGAGCGATGC  
ACGCCAAGCAGTGCAGCCGCCTCTTTCACGGTGCGGCCTTCCTGGTCGATCAGCTCGCGGGCGTGCGGA  
TCTGTGCCGGGTGAGGGTAGGGCGGGGCCAAACTTCACGCCTCGGGCCTTGGCGGCCTCGCGCCCGCT  
CCGGGTGCGGTGCGATGATTAGGGAACGCTCGAACTCGGCAATGCCGGCGAACACGGTCAACACCATGCGG  
CCGGCCGGCGTGGTGGTGTCGGCCACGGCTCTGCCAGGCTACGCAGGCCCGCGCCGGCCTCCTGGATGC  
GCTCGGCAATGTCCAGTAGGTGCGGGTGCTGCGGGCCAGGCGGTCTAGCCTGGTCACTGTCACAACGTC  
GCCAGGGCGTAGGTGGTCAAGCATCCTGGCCAGCTCCGGCGGTGCGGCCTGGTGCCGGTGATCTTCTCG  
GAAAACAGCTTGGTGACGCCGGCCGCGTGACGTTGCGCCCGTTGGTTGGTCAAGTCTGGTCGTGCGGTGC  
TGACGCGGGCATAGCCCAGCAGGCCAGCGGCGGCGCTCTGTTCATGGCGTAATGTCTCCGGTTCTAGTC  
GCAAGTATTCTACTTTATGCGACTAAAACACGCGACAAGAAAACGCCAGGAAAAGGGCAGGGCGGCAGCC  
TGTCGCGTAACCTTAGGACTTGTGCGACATGTGTTTTGAGAAGACGGCTGCACTGAACGTGAGAAGCCGA  
CTGCACTATAGCAGCGAGGGGTTGGATCAAAGTACTTTGATCCCAGGGGAACCCTGTGGTTGGCATGC  
ACATACAAATGGACGAACGGATAAACCTTTTCACGCCCTTTTAAATATCCGTTATTCTAATAAACGCTCT  
TTTCTCTTAGGTTTACCCGCCAATATATCTGTCAAACACTGATAGTTTAAACTGAAGGCGGGAAACGAC  
AATCTGATCCAAGCTCAAGCTAAGCTTGAGCTCTGCATGCCTGCAGGTCCCCAGATTAGCCTTTTCAATT  
TCAGAAAGAATGCTAACCACAGATGGTTAGAGAGGCTTACGCAGCAGGTCTCATCAAGACGATCTACCC  
GAGCAATAATCTCCAGGAAATCAAATACCTTCCCAAGAAGGTTAAAGATGCAGTCAAAAGATTTCAGGACT  
AACTGCATCAAGAACACAGAGAAAGATATATTTCTCAAGATCAGAAGTACTATTCCAGTATGGACGATTC  
AAGGCTTGCTTCACAAACCAAGGCAAGTAATAGAGATTGGAGTCTCTAAAAAGGTAGTTCCCACTGAATC  
AAAGGCCATGGAGTCAAAGATTCAAATAGAGGACCTAACAGAACTCGCCGTAAAGACTGGCGAACAGTTC  
ATACAGAGTCTCTTACGACTCAATGACAAGAAGAAAATCTTCGTCAACATGGTGAGACGACACACTTG  
TCTACTCCAAAAATATCAAAGATACAGTCTCAGAAGACCAAAGGGCAATTGAGACTTTTCAACAAAGGT  
AATATCCGGAAACCTCCTCGGATTCCATTGCCCAGCTATCTGTCACTTTATTGTGAAGATAGTGGAAG  
GAAGGTGGCTCTACAAATGCCATCATTGCGATAAAGGAAAGGCCATCGTTGAAGATGCCTCTGCCGACA  
GTGGTCCCAAAGATGGACCCCCACCCACGAGGAGCATCGTGAAAAAGAAGACGTTCCAACCACGTCTTC  
AAAGCAAGTGGATTGATGTGATATCTCCACTGACGTAAGGGATGACGCACAATCCCACTATCCTTCGCAA  
GACCTTCTCTATATAAGGAAGTTCAATTTCAATTTGGAGAGAACACGGGGGACTCTAGAGGATCCAAGGA  
GATATAACATTACGCCGAGGCCTCTTCCTATATGGTGAGCAAGGGCGAGGAGCTGTTACCGGGGTGGT  
GCCCATCCTGGTCGAGCTGGACGGCGACGTAAACGGCCACAAGTTCAGCGTGTCGGCGAGGGCGAGGGC  
GATGCCACCTACGGCAAGCTGACCTGAAGTTCATCTGCACCACGGCAAGCTGCCCCTGCCCTGGCCCA  
CCCTCGTGACCACCCTGACCTACGGCGTGACGTGCTTCAGCCGCTACCCCGACCACATGAAGCAGCACGA  
CTTCTTCAAGTCCGCCATGCCCGAAGGCTACGTCCAGGAGCGCACCATCTTCTTCAAGGACGACGGCAAC  
TACAAGACCCGCGCCGAGGTGAAGTTCGAGGGCGACACCCTGGTGAACCGCATCGAGCTGAAGGGCATCG  
ACTTCAAGGAGGACGGCAACATCCTGGGGCACAAGCTGGAGTACAACATAACAGCCACAACGTCTATAT

CATGGCCGACAAGCAGAAGAACGGCATCAAGGTGAACTTCAAGATCCGCCACAACATCGAGGACGGCAGC  
GTGCAGCTCGCCGACCACTACCAGCAGAACACCCCCATCGGCGACGGCCCCGTGCTGCTGCCCCGACAACC  
ACTACCTGAGCACCCAGTCCGCCCTGAGCAAAGACCCCAACGAGAAGCGCGATCACATGGTCCTGCTGGA  
GTTTCGTGACCGCCGCCGGGATCACTCTCGGCATGGACGAGCTGTACAAGTAATGATATCCCGCGGCCATG  
CTAGAGTCCGCAAAAATCACCAGTCTCTCTCTACAAATCTATCTCTCTCTATTTTCTCCAGAATAATGT  
GTGAGTAGTTCCCAGATAAGGGAATTAGGGTTCTTATAGGGTTTCGCTCATGTGTTGAGCATATAAGAAA  
CCCTTAGTATGTATTTGTATTTGTAAAATACTTCTATCAATAAAATTTCTAATTCCTAAAACCAAATCC  
AGTGACCTGCAGGCATGCGACGTCG

## Supplemental Data 4. Amino acid sequence alignment, classification, and phylogenetic tree analysis

### Supplemental Data 4-1 : p23 amino acid sequences

>AJ297704.1

tfvsvnl sdesntastrvenvkseadrleflrkmpfiidalvrktnyqgarfrariigvcvdcg  
rkhdalkterkckvntqsqnevahmlmhdvpkylnkrkarafsnaemfaielvlytkekqlav  
dlaaerektrlarrhpmrspeetpehykfgmtasamlpelnavgv dnedtsseysvslsvsggv  
1

>DQ831487.1

tastevktvsseadrleflrkmpfiidalirktsyqgarfrariigvcvdcgrkhdkglnkerk  
ckvntqsqnevahmlmhdvpkylnkrkarafsnaemfaidlvmytkerqlavdlaaerektrla  
rrhpmrspeetpehykfgmtakaispdinavdv dnedtsseyp

>DQ831488.1

tastavrtvsseadrleflrkmpfiidalvrktnyqgarfrakiigvcvdcgrkhdkglnkerk  
ckvntqsqnevahmlmhdvpkylnkgkarafsnaemfaidlvmytketqlavdlaaerektrla  
rrhpmrspeetpefykfgitakamlpninavdv dnedtsseyp

>DQ831493.1

tastrvenvkseadrleflrkmpfiidalvrktnyqgarfrariigvcvdcgrkhdalkterk  
ckvntqsqnevahmlmhdvpkylnkrkarafsnaetfaielvlytkekqlavdlaaerektrla  
rrhpmrspeetpehykfgmtakamlpefnavgv dnedtsseyp

>DQ831495.1

tastkvetvkseadrleflrkmpfiidalvrktnyqgarfrariigvcvdcgrkhdkgfkterk  
ckvntqsqnevahmlmhdvpkylnkrkarafsnaetfaidlvlytkekqlavdlaaerektrla  
rrhpmrspeetpehykfgmtakamlpefnavgv dnedtsseyp

>DQ831496.1

tastkvenvkseadrleflrkmpfvidalvrktnyqgarfrariigvcvdcgrkhdralkterk  
ckvntqsqnevahmlmhdvpvrylnkrkarafsnaetfaielvlytkerqlavdlaaerektrla  
rrhpmrspeetpeyykfgmtakamlpdinavdv dneetsseyp

>AJ298843.1

mdntsgqtfvsvnl sdesntastrvenvkseadrleflrkmpfiidalvrktnyqgarfrarii  
gvcvdcgrkhdalkterkckvntqsqnevahmlmhdvpkylnkrkarafsnaemfaielvlyt  
kekqlavdlaaerektrlarrhpmrspeetpehykfgmtasamlpelnavgv dnedtsseypvs  
lsvsggvlrehhfi

>U42006.1

mdntsgqtfisvnl sdesntasteikavsseadrleflrkmpfiidalirknnnyqgarfrarii  
gvcvdcgrkhdksrterkckvntlvqnevahmlmhdvpkylnkrkarafsnaemfaidlvmt  
kerqlavdlaaerektrlarrhpmrspeetpehykfgttakamlpdinavdv dnedtsseypvs  
lsvsggvlrehhfi

>U42017.1

mdntsgqtfisvnl sdesntastevktvsseadrleflrkmpfiidalirktsyqgarfrarii  
gvcvdcgrkhdkglnkerkckvntqsqnevahmlmhdvpkylnkrkarafsnaemfaidlvmt  
kerqlavglaaerektrlarrhpmrspeetpehykfgmtakatlpdinaidv dnedasseyppvs  
lsvsggvlrehhfi

>U42018.1

mdntsgqtfisvnlstdksntastevktvsseadrleflrkmpfvidalirktsyqgarfrarii  
gvcvdcgrkhkheksrterkckvnntqsqnevahmlmhdpvkylskrkarafsnaemfaidlvm  
kerqlavdlaaerektrlarkhpmrspeetpehykfgmtakamlpdinvvnvgdnedtsseypvs  
lsvssgvlrehhli

>U42019.1

mdntsgqtfvsvnlstdesntastkvenvkseadrleflrkmpfiidalvrktnyqgarfrarii  
gvcvdcgrkhdkalkterkckvnntqsqnevahmlmhdpvkylnrkarafsnaemfaielvlyt  
kerqlavdlaaerektrlarrhpirspeetpehykfgmtakamlpdinavdvgdneetsseypvs  
lsvsggvlrehhfi

>U42020.1

mdntsgqtfvsvnlstdesntastkvenvkseadrleflrkmpviidalvrktnyqgarfrarii  
gvcvdcgrkhdkalkterkckvnntqsqnevahmlmhdpvkyltkrkarafsnaemfaielvlyt  
kerqlavdlaaerektrlarrhpmrspeetpehykfgmtakamlpdinavdvgdseetsseypvs  
lsvsggvlrehhfi

>U42021.1

mdntsgqtfvsvnlstdesntastkvenvkseadrldflrkmpfivdalvrktnyqgarfrarii  
gvcvdcgrkhdkalkterkckvnntqsqnevahmlmhdpvkylnrkarafsnaemfaielvlyt  
kerqlavdlaaerektrlarrhpirspeetpehykfgmtakamlpdinavdvgdneetsseypvs  
lsvsggvlrehhfi

>U42022.1

mdnpsgqtfisvnlstdesntastetkavsseadrleflrkmpfiidalirknsyqgarfrarii  
gvcvdcgrkhdkasrterkckvnntqsqnevahmlmhdpvkylnrkarafsnaemfaidlvmht  
kerqlavdlaaerektrlarrhpmrspeetpehykfgmtakamlpninavdvgdnedtsseypvs  
lsvsggvlrehhli

>U42023.1

mdntsgqtfisvnlstdesntastevktvtseadrleflrkmpftidalirktsyqgarfrarii  
gvcvdcgrkhdkglkterkckvnntqsqnevahmlmhdpvkylnrkarafsnaemfaidlvmht  
kerqlavglaaerektrlarrhpmrspeetpehykfgmtakamlpdinaigvgdnedtsseypvs  
lsvsggvlrehhfi

>U42024.1

mdntsgqtfvsvnlstdesntastkvenvkseadrleflrkmpfivdalvrktnyqgarfrarii  
gvcvdcgrkhdkalkterkckvnntqsqnevahmlmhdpvkylnrkarafsnaemsaielvsyt  
kerqlavdlaaerektrlarrhpirspeetpdykfgmtakamlpdinavdvgdneetsseypvs  
lsvsggvlrehhfi

>EU262682.1

desntastavrtvsseadrleflrkmpfiidalvrktnyqgarfrakiigvcvdcgrkhdkglk  
terkckvnntqsqnevahmlmhdpvkylngkarafsnaemfaidlvmtykkeqlavnlaaerek  
trlarrhpmrspeetpefykfgitakamlpninavdvgdnedtsseypvslsvsd

>EU262683.1

desntastavrtvsseadrleflrkmpfiidalvrktnyqgarfrakiigvcadcgrkhdkglk  
terkckvnntqsqnevahmlmhdpvkylngkarafsnaemfaidlvmtykkeqlavnlaaerek  
trlarrhpmrspeetpefykfgitakamlpninavdvgdnedtsseypvslsvsd

>EU262685.1

desntasteikavsseadrleflrkmpfiidalirknsyqgarfrariigvcvdcgrkhdkasr  
terkckvnntqsqnevahmlmhdvpkylnkrkarafsnaemfaidlvmtkerqlavdlaaerek  
trlarrhpmrspeetpehykfgmtakamlpdinavdvgnedtsseypvslsvsg

>EU262686.1

desntasteikavsseadrleflrkmpfiidalvrktnyqgarfrakiigvcvdcgrkhdkgk  
terkckvnntqsqnevahmlmhdvpkylnkgkarafsnaemfaidlvmytkekqlavnlaaerek  
trlarrhpmrspeetpefykfgttakamlpninavdvgnedtsseypvslsvsd

>EU262688.1

desntasteikavsseadrleflrkmpfiidalirknsyqgarfrariigvcvdcgrkhdkasr  
terkckvnntqsqnevahmlmhdvpveylkrkarafsnaeifaidlvmtkerqlavdlaaerek  
trlarrhpmrspeetpehykfgmtakamlpdinavdvgnedtsseypvslsvsd

>EU262689.1

desntastavrtvsseadrleflrkmpfiidalvrktnyqgarfrakiigvcvdcgrkhdkgk  
terkckvnntqsqnevahmlmhdvpkylnkgkarafsnaemfaidlvmytkekqlavnlaaerek  
trlarrhpmrspeetpefykfgttakamlpninavdvgnedtsseypvslsvsd

>EU483657.1

gqtfvsvnlstdesntasteikavsseadrleflrkmpfiidalirknsyqgarfrariigvcvd  
cgrkhdkasrterkckvnntqsqnevahmlmhdvpkylnkrkarafsnaemfaidlvmtkerql  
avdlaaerektrlarrhpmrspeetpehykfgmtakamlpdinavdvgnedtsseypvslsvsg  
gvlrehhfi

>EU487601.1

gqtfvsvnlstdesntasteikavsseadrleflrkmpfiidalirknsyqgarfrariigvcvd  
cgrkhdkasrterkckvnntqsqnevahmlmhdvpkylnkgkarafsnaemfaidlvmtkerql  
avdlaaerektrlarrhpmrspeetpehykfgmtakamlpdinavdvgnedtsseypvslsvsg  
gvlrehhfi

>EU487603.1

gqtfvsvnlstdesntastkvenvkseadrleflrkmpfivdalvrktnyqgarfrariigvcvd  
cgrkhdalkterkckvnntqsqnevahmlmhdvpkylnkrkarafsnaemfaielvfytkerql  
avdlaaerektrlarrhpirspeetpehykfgmtakamlpdinavdvgdneetsseypvslsvsg  
gvlrehhfi

>FJ860136.1

mdtsgqtfisvnlstdesntastevktsleadrleflrkmpfiidalirktnyqgarfrarii  
gvcvdcgrkhdkasrterkckvnntqsqnevahmlmhdvpkylnkrkarafsnaemfaidlvmt  
kerqlavdlaaerektrlarrhpmrspeetpehykfgitakamlpdidaivdvgnedtsseypvs  
lsvsggvlrehhfil

>FJ860138.1

mdtsgqtfisvnlstdesntastevktsleadrleflrkmpfiidalirktnyqgarfrarii  
gvcvdcgrkhdkasrterkckvnntqsqnevahmlmhdvpkylnkrkarafsnaemfaidlvmt  
kerqlavdlaaerektrlarrhpmrspeetpehykfgitakamlpdidaivdvgnedtsseypvs  
lsvsggvsrehhfi

>FJ860140.1

mdtsgqtfisvnlstdesntastevktsleadrleflrkmpfiidalirktnyqgarfrarii  
gvcvdcgrkhdkasrterkckvnntqsqnevahmlmhdvpkylnkrkarafsnaemfaidlvmt  
kerqlavdlaaerektrlarrhpmrspeetpehykfgitakamlpdinaidvgnedtsseypvs

lsvsggvsrehhfi

>FJ860142.1

mddtsgqtfvsvnlsgdesntastavrtvsseadrleflrkmpfiidalvrktnyqgarfrarii  
gvcdvdcgrkhdkgkterkckvnntqsqnevahmlmhdvpvrylnkgkarafsnaemfaidlvmyt  
kekqlavnlaaerektrlarrhpmrspeetpehykfgitakamlpninavdvgdnedtsseypvs  
lsvsdgvlrehhfi

>FJ860143.1

mddisgqtfvsvnlsgdesntastrvenvnseadrleflrkmpfiidalvrktnyqgarfrarii  
gvcdvdcgrkhdalkterkckvnntqsqnevahmlmhdvpvrylnkrkarafsnaemfaielvlyt  
kerqlavdlaaerektrlarrhpirspeetpehykfgmtakamlpdinavdvgdneetsseypvs  
lsvsggvlrehhfi

>FJ860144.1

mddtigqtfvsvnlsgdesntastrvenvnseadrleflrkmpfiidalvrktnyqgarfrarii  
gvcdvdcgrkhdalkterkckvnntqsqnevahmlmhdvpvrylnkrkarafsnaemfaielvlyt  
kerqlavdlaaerektrlarrhpirspeetpehykfgmtakamlpdinavdvgdneetsseypvs  
lsvsggvlrehhfi

>FJ860145.1

mddtsgqtfisvnlsgdesntasteiktvsseadrleflrkmpfiidalirknsyqgarfrarii  
gvcdvdcgrkhdkasrterkckvnntqsqaevahmlmhdvpvrylnkrkarafsnaemfaidlvmt  
kerqlavdlaaerektrlarrhpmrspeetpehykfgitakamlpdinaidvgdnedtsseypvs  
lsvsggvlrehhfi

>FJ860146.1

mddtsgqtfvsvnlsgdesntastrvenvkseadrleflrkmpfiidalvrktnyqgarfrarii  
gvcdvdcgrkhdalkterkckvnntqsqnevahmlmhdvpvrylnkrkarafsnaemfaielvlyt  
kerqlavdlaaerektrlarrhpirspeetpehykfgmtakamlpdinavdvgdneetsseypvs  
lsvsggvlrehhfi

>GQ475044.1

mdntsgqtfisvnlsgdesntasteiktvsseadrleflrkmpfiidalirknsyqgarfrarii  
gvcdvdcgrkhdkasrterkckvnntqsqnevahmlmhdvpvrylnkrkarafsnaemfaidlvmt  
kerqlavdlaaerektrlarrhpmrspeetpehykfgmtakamlpdinavdvgdnedtsseypvs  
lsvsggvlrehhfi

>GQ475045.1

mdntsgqtfvsvnlsgdesntasteikavsseadrleflrkmpfiidalirknsyqgarfrarii  
gvcdvdcgrkhdkasrterkckvnntqsqnevahmlmhdvpvrylnkrkarafsnaetfaidlvmt  
kerqlavdlaaerektrlarrhpmrspeetpehykfgmtakamlpdinavdvgdnedtsseypvs  
lsvsggvlrehhfi

>GQ475046.1

mdntsgqtfisvnlsgdesnpasteiktvsseadrleflrkmpfiidalirknsyqgarfrarii  
gvcdvdcgrkhdkasrterkcrvnntqsqnevahmlmhdvpvrylnkrkarafsnaemfaidlvht  
kerqlavdlaaerektrlarrhpmrspeetpehykfgmtakamlpdinavdvgdnedtsseypvs  
lsvsggvlrehhfi

>GQ475047.1

mdntsgtffisvnlsgdesntasteiktvsseadrleflrkmpfiidalirknsyqgarfrarii  
gvcdvdcgrkhdkasrterkckvnntqsqnevahmlmhdvpvrylnkgkarafsnaemfaidlvmt

kerrlavdlaaerektrlarrhpmrspeetpehykfgmtakamlpdinavdvgnedsseypvs  
lsvsggvlrehhfi

>GQ475048.1

mdntsgqtfisvnlsgdesntasteikavsseadrleflrkmpfiidalirknsyqgarfrarii  
gvcvdcgrkhdkasrterkckvnntqsqnevahmlmhdvpvylkrkarafsnaemfaidlvmt  
kerqlavdlaaerektrlarrhpmrspeetpehykfgmtakamlpdinavdvgnedsseypvs  
lsvsggvlrehhfi

>GQ475049.1

mdntsgqtfvsvnlsgdesntastavrtvsseadrleflrkmpfiidalirktnyqgarfrakii  
gvcvdcgrkhdkglkterkckvnntqsqnevahmlmhdvpvylngkarafsnaemfaidlvmyt  
kekqlavnlaaerektrlarrhpmrspeetpefykfgitakamlpninavdvgnedsseypvs  
lsvsdgvlrehhfi

>GQ475051.1

mdntsgqtfvsvnlsgdesntastavrtvsseadrleflrkmpfiidalvrktnyqgarfrakii  
gvcvdcgrkhdkelkterkckvnntqsqnevahmlmhdvpvylngkarafsnaemfaidlvmyt  
kekqlavnlaaerektrlarrhpmrspeetpefykfgitakamlpninavdvgnedsseypvs  
lsvsdgvlrehhfi

>GQ475052.1

mdntsgqtfvsvnlsgdesntastavrtvsseadrleflrkmpfiidalvrktnyqgarfrakii  
gvcvdcgrkhdkglkterkckvnntqsqnevahmlmhdvpvylngkarafsnaemfaidlvmyt  
kekqlavnlaaerektrlarrhpmrspeetpefykfgitakamlpninavdvgnedsseypvs  
lsvsdgvlrehhfi

>GQ338645.1

tfvsvnlsgdesntastevenvkseadrleflrkmpfiidalvrktnyqgarfrariigvcvdcg  
rkhdalkterkckvnntqsqnevahmlmhdvpvylkrkarafsnaetfaielvlytkekqlav  
dlaaerektrlarrhpmrspeetpehykfgmtakamlpdfnavdvgnedsseypvslsvsggv  
1

>GQ338646.1

tfvsvnlsgdesntastrvenvkseadrleflrkmpfiidalvrktnyqgarfrariigvcvdcg  
rkhdalkterkckvnntqsqnevahmlmhdvpvylkrkarafsnaetfaielvlytkekqlav  
dlaaerektrlarrhpmrspeetpehykfgmtakamlpfnavgvgdsedsseypvslsvsggv  
1

>GQ338647.1

tfisvnlsgdesntasteiktvsseadrleflrkmpfiidalirknsyqgarfrariigvcvdcg  
rkhdkasrterkckvnntqsqnevahmlmhdvpvylkrkarafsnaemfaidlvmtkerqlav  
dlaaerektrlarrhpmrspeetpehykfgmtakamlpdinavdvgnedsseypvslsvsggv  
1

>GQ338648.1

tfvsvnlsgdesntastkvenvkseadrleflrkmpviidalvrktnyqgarfrariigvcvdcg  
rkhdalkterkckvnntqsqnevahmlmhdvpvylkrkarafsnaemfaielvlytkerqlav  
dlaaerektrlarrhpmrspeetpehykfgmtakamlpdinaadvddneetsseypvslsvsggv  
1

>GQ338650.1

tfisvnlsgdesntastevktvsseadrleflrkmpfiidalirktsyqgarfrariigvcvdcg



rkhdkgkterkckvnntqsqnevahmlmhdvpkylskgkarafsnaekfaidlvmytkekqlav  
nltaerektrlarrhpmrspeetpehykfgmtakamlpdinavvgdnedtsseypvslsisdgv  
1

>GQ338651.1

tfvsvnlstdesntastrvenvkpeadrleflrkmpfiidalvrktnyqgarfrariigvcvdcg  
rkhdalkterkckvnntqsqnevahmlmhdvpkylnkrkarafsnaemfaielvstykekqlav  
dlaaerektrlarrhpmrspeetpefykfgmtakamlpelnavvgdnedtsseypvslsvsggv  
1

>GQ338652.1

tfisvnlstdesntasteiktvsseadrleflrkmpfiidalirktsyqgarfrariigvcvdcg  
rkhdkgstrterkckvnntqsqnevahmlmhdvpkylnkrkarafsnaemfaidlvmhtkerqlav  
dlaaerektrlarkhpmrspeetpeyykfgmtakamlpdinvgvgdnedtsseypvslsvsggv  
1

>GQ338653.1

tfisvnlstdesntasteikavsseadrleflrkmpfiidalirknsyqgarfrariigvcvdcg  
rkhdkasrterkckvnntqsqnevahmlmhdvpkylnkrkarafsnaemfaidlvmhtkerqlav  
dlaaerektrlarrhpmrspeetpehykfgmtakamlpdinavdvgdnedtsseypvslsvsggv  
1

>GQ338654.1

tfisvnlstdesntasteiktvsseadrleflrkmpfiidalirknsyqgarfrariigvcvdcg  
rkhdkasrterkckvnntqsqnevahmlmhdvpkylnkgkarafsnaemfaidlvmhtkerqlav  
dlaakerektrlarrhpmrspeetpehykfgmtakamlpdinavdvgdnedtsseypvslnvsggv  
1

>GQ338656.1

tfvsvtlstdesntastrvenvkpeadrleflrkmpfiidalvrktnyqgarfrakiigvcvdcg  
rkhdalkterkckvnntqsqnevahmlmhdvpkylnkrkarafsnaetfaielvlytkekqlav  
dlaaerektrlarrhpmrspeetpehykfgmtakamlpelnavvgdnedtsseypvslsvsggv  
1

>GQ338657.1

tfvsvnlstdesntastavrtvsseadrleflrkmpfiidalvrktnyqgarfrakiigvcvdcg  
rkhdkgkterkckvnntqsqnevahmlmhdvpkylnkgkarafsnaemfaidlvmytkekqlai  
nlaaerektrlarrhpmrspeetpefykfgitakamlpninavdvgdnedtsseypvslsvsdgv  
1

>GQ338658.1

tfisvnlstdesntastevktvsseadrleflrkmpfiidalirktsyqgarfrariigvcvdcg  
rkhdkgstrterkckvnntqsqnevahmlmhdvpkylnkrkarafsnaemfaidlvmhtkerqlav  
dlaaerektrlarkhpmrspeetpehykfgmtakamlpdinavdvgdnedtsseypvslsvsggv  
1

>GQ338659.1

tfvsvnlstdesntastevenvnseadrleflrkmpfiidalvrktnyqgarfrariigvcvdcg  
rkhdkalrterkckvnntqsqnevahmlmhdvpkylnkrkarafsnaemfaielvstykekqlav  
dlaaerektrlarrhpmrspeetpefykfgmtakamlpdinavvgdnedtsseypvslsvsggv  
1

>HQ329231.1

mdntsgqtfisvslsdesntastevktsseadrleflrkmpfvidalirktsyqgarfrarii  
gvcvdcgrkhdkgstrterkckvnntqsqnevahmlmhdpvkylskrkarafsnaemfaidlvm  
kerqlavdlaaerektrlarkhpmrspeetpehykfgmtakamlpdinvvnvgdnedtsseypvs  
lslrsggvlrehhfil

>HQ329232.1

mdntsgqtfisvnlslsdesntastevktsseadrleflrkmpfiidalirktsyqgarfrarii  
gvcvdcgrkhdkgstrterkckvnntqsqnevahmlmhdpvkylskrkarafsnaemfaidlvm  
kerqlavdlaaerektrlarkhpmrspeetpehykfgmtakamlpdvvnvdvgdnedtsseypvs  
lsisggvlrehhfil

>HQ329233.1

mdntsgqtfisvnlslsdesntastevktsseadrleflrkmpfvidalirktsyqgarfrarii  
gvcvdcgrkhdkgstrterkckvnntqsqnevahmlmhdpvkylskrkarafsnaemfaidlvm  
kerqlavdlaaerektrlarkhpmrspeetpehykfgmtakamlpdinvvnvgdnedtsseypvs  
lsvsggvlrehhfil

>HQ329234.1

mdntsgqtfisvnlslsdesntastevktvgseadrleflrkmpfvidalirktsyqgarfrarii  
gvcvdcgrkhdkatrterkckvnntqsqaevahmlmhdpvkyltkrkarafsnaemfaidlvm  
kerqlavnlaaerektrlarrhpmrspeetpehykfgmtakamlpdinaidvgdnedtsseypvs  
lsisggvlrehhfil

>HQ329235.1

mdntsgqtfisvnlslsdesntastevktvgseadrleflrkmpfiidtlirktsyqgarfrarii  
gvcvdcgrkhdkatrterkckvnntqsqaevahmlmhdpvkylkrkarafsnaemfaidlvm  
kerqlavnlaaerektrlarrhpmrspeetpehykfgmtakamlpdinaidvgdnedtsseypvs  
lsisggvlrehhfil

>HQ329236.1

mdntsgqtfisvnlslsdesntastevktvgseadrleflrkmpfiidalirktsyqgarfrarii  
gvcvdcgrkhdkatrterkckvnntqsqaevahmlmhdpvkylkrkarafsnaemfaidlvm  
kerqlavdlaaerektrlarrhpmrspeetpehykfgmtakamlpdinaidvgdnedtsseypvs  
lsisggvlrehhfil

>HQ329237.1

mdntsgqtfisvnlslsdesntastevktsseadrleflrkmpfvidalirktsyqgarfrarii  
gvcvdcgrkhdkgstrterkckvnntqsqnevahmlmhdpvkylskrkarafsnaemfaidlvm  
kerqlavdlaaerektrlarkhpmrspeetpeyykfgmtakamlpdinvvnvgdnedtsseypvs  
lsvsggvlrehhfil

>HQ329238.1

mdntsgqtfisvnlslsdesntastevktsseadrleflrkmpfiidalirknsyqgarfrarii  
gvcvdcgrkhdkgltkterkckvnntqsqnevahmlmhdpvkylngkarpfsnaemfaidlvm  
kerqlavnlaaerektrlarrhpmrspeetpeyykfgmtakamlpdinainvgdnedtsseypvs  
lsvsggvlrehhfil

>HQ329239.1

mdntsgqtfisvnlslsdesntastevktsseadrleflrkmpfvidalirktsyqgarfrarii  
gvcvdcgrkhekgsrterkckvnntqsqnevahmlmhdpvkylskrkarafsnaemfaidlvm  
kerqlavdlaaerektrlarkhpmrspeetpeyykfgmtakavlpdinvnvgdnedtsseypvk  
ssvsggvlrehhfil

>HQ329240.1

mdntsgqtfisvnlsgdesntastevktvgseadrleflrkmpfiidalirktsyqgarfrarii  
gvcdvdcgrkhdkatrterkckvnntqsgaevahmlmhdpvkiylikrkarafsnaemfaidlvmt  
kerqlavnlaaerektrlarrhpmrspeetpehykfgmtakamlpdinaidvgdnedtsseypvs  
lsisggvltrehhfil

>HQ329241.1

mdntsgqtfisvnlsgdesntastevktvgseadrleflrkmpfvidalirktsyqgarfrarii  
gvcdvdcgrkhdkatrterkckvnntqsgaevahmlmhdpvkiylikrkarafsnaemfaidlvmt  
kerqlavnlaaerektrlarrhpmrspeetpehyefgmtakamlpdvnaidvgdnedtsseypvs  
lsisggvltrehhfil

>HQ329242.1

mdntsgqtfisvnlsgdesntastevktvsseadrleflrkmpftidalirktsyqgarfrarii  
gvcdvdcgrkhdkvsrterkckvnntqsgnevahmlmhdpvkylkrkarafsnaemfaidlvmt  
kekqlavdlaaerektrlarrhpmrspeetpeyykfgmtakamlpdinaidvgdnedtsseypvs  
lsvsggvltrehhfil

>HQ329243.1

mdntsgqtfisvnlsgdesntastevktvsseadrleflrkmpfvidalirktsyqgarfrarii  
gvcdvdcgrkhdkglrterkckvnntqsgnevahmlmhdpvkylskrkkarafsnaemfaidlvmt  
kerqlavdlaaerektrlarkhpmrspeetpehykfgmtakamlpdinvvnvgdnedtsseypvs  
lnvsggvltrehhfil

>HQ329244.1

mdntsgqtfisvnlsgdeshtastevktvsseadrleflrkmpfiidalirktsyqgarfrarii  
gvcdvdcgrkhdkgsrterkckvnntqsgnevahmlmhdpvkylskrkkarafsnaemfaidlvmt  
kerqlavdlaaerektrlarkhpmrspeetpehykfgmtakamlpdvnvvdvgdnedtsseypvs  
lsisggvltrehhfil

>HQ329245.1

mdntsgqtfisvnlsgdesntastevktvsseadrleflrkmpfiidalirktsyqgarfrarii  
gvcdvdcgrkhdkasrterkckvnntqsgnevahmlmhdpvkylkrkarafsnaemfaidlvmt  
kekqlavdlaaerektrlarrhpmrspeetpeyykfgmtakamlpdinaidvgdnedtsseypvs  
lsvsggvltrehhfil

>HQ329246.1

mdntsgqtfisvnlsgdesntastevktvsseadrleflrkmpftidalirkpsyqgarfrarii  
gvcdvdcgrkhdkasrterkckvnntqsgnevahmlmhdpvkylkrkarafsnaemfaidlvmt  
kekqlavdlaaerektrlarrhpmrspeetpeyykfgmtakamlpdinaidvgdnedtsseypvs  
lsvsggvltrehhfil

>AJ579762.1

mddtigqtfvsvnlsgdesntastkvenvkseadrleflrkmpfivdalvrktnyqgarfrarii  
gvcdvdcgrkhdkalkterkckvnntqsgnevahmlmhdpvkylkrkarafsnaemfaielvlyt  
kerqlavdlaaerektrlarrhpirspeetpehykfgmtakamlpdinavdvgdneetsseypvs  
lsvsggvltrehhfi

>AJ579764.1

mdntsgqtfvsvnlsgdesntastkvenvkseadrleflrkmpfivdalvrktnyqgarfrarii  
gvcdvdcgrkhdkalkterkckvnntqsgnevahmlmhdpvkylkrkarafsnaemfaielvlyt  
kerqlavdlaaerektrlarrhpirspeetpehykfgmtakamlpdinavdvgdneetsseypvs

lsvsggvlrehhfi

>AJ579766.1

mdtstsgqtfvsvnlsgdesntastkvenvkseadrleflrkmpfiivdalvrktnyqgarfrarii  
gvcvdcgrkxhdkalkterkckvnntqsqnevahmlmhdvpkylnkrkarafsnafaielvlht  
kerqlavdlaaerektrlarrhpirspeetpehykfgmtakamlpdtnavdvgdneetsseypvs  
lsvsggvlrehhfi

>AJ579767.1

mndtsgqtfvsvnlsgdesntastevktvsseadrleflrkmpftidalirkasyqgarfrarii  
gvcvdcgrkxhdkglkterkckvnntqsqnevahmlmhdvpkylnkrkarafsnafaielvlht  
kerqlavdlaaerektrlarrhpmrspeetpehykfgttakamlpdivnavdvgdneetsseypvs  
lsvsggvlrehhfi

>AJ579768.1

mdtstsgqtfvsvnlsgdesntastrvenvkseadrleflrkmpfiidalvrktnyqgarfrarii  
gvcvdcgrkxhdkalkterkckvnntqsqnevahmlmhdvpvrylnkrkarafsnafaielvlht  
kekqlavdlaaerekarlarrhpmrspeetpehykfgmtakamlpefnavgvgdnedtsseypvs  
lsvsggvlrehhfi

>AJ579769.1

mdtstsgqtfisvdlsgdesntastevktvsleadrlleflrkmpftidalirktnyqgarfrarii  
gvcvdcgrkxhdkglrterkckvnntqsqnevahmlmhnvpveylngkarafsnafaidlvmyt  
kekqsavnlaaerektrlarrhpmrspeetpehykfgmtakatlpdinavdvgdnedtsseypvs  
lsvsngvlrehhfi

>AJ579770.1

mdtstsgqtfvsvnlsgdesntastavrtvsseadrleflrkmpfvidalvrktsyqgarfrakii  
gvcvdcgrkxhdkglkterkckvnntqsqnevahmlmhdvpkylnkrkarafsnafaidlvmyt  
kekqlavnlaaerektrlarrhpmrspeetpehykfgmtakamlpdivnavdvgdnedtsseypvs  
lsvsdgvlrehhfi

>AJ579771.1

mdtstsgqtfvsvnlsgdesntastavrtvsseadrleflrkmpfiidalvrktnyqgarfrakii  
gvcvdcgrkxhdkglkterkckvnntqsqnevahmlmhdvpkylnkgkarafsnafaidlvmyt  
kekqlavnlaaerektrlarrhpmrspeetpefykfgitakamlpninavdvgdnedtsseypvs  
lsvsdgvlrehhfi

>AJ579772.1

mdntsgqtfvsvnlsgdesntattdvkpvsseadrldflqkmpiiidalirknsyqgarfrarii  
gvcvdcgrkxhdkglkterkckvnntqsqnevahmlmhdvpkylnkrkarafsnafaidlvmyt  
kerqlaidlaaerektrlarrhpmrspeetpeyykfggtakamlpdivnavdvgdneetsseypvs  
lsvsggvlrehhfi

>AJ579773.1

mdtstsgqtfisvnlsgdesntastevktvsleadrlleflrkmpfiidalirktsyqgarfrarii  
gvcvdcgrkxhdkasrterkckvnntqsqnevahmlmhdvpkylnkrearafsnafaidlvmyt  
kerqlavdlaaerektrlarrhpmrspeeapehykfgmtakamlpninaidvgdnedtsseypvs  
lsvsggvlrehhfi

>AJ579774.1

mgdtsgqtfisvnlsgdesntasteikavsseadrleflrkmpfiidalirknsyqgarfragii  
gvcvdcgrkxhdkasrterkckvnntqsqnevahmlmhdvpviylkrkarafsnafaidlvmyt

kerqlavdlaaerektrlarrhpmrspeetpehykfgmtakamlpdinavdvgnedsseypvs  
lsvsggvlrehhfi

>AJ579776.1

mdtsgqtfisvnlsgdesntasteiktvsseadrleflrkmpfiidalirknsyqgarfrarii  
gvcvdcgrkhdkasrterkckvnntqsqnevahmlmhdpvkylnrkarafsnaemfaidlvmyt  
kerqlavdlaaerektrlarrhpmrspeetpehykfgmtakamlpdinavdvgnedsseypvs  
lsvsggvlrehhfi

>AJ579777.1

mdtsgqtfisvnlsgdesntasteiktvsseadrleflrkmpfiidalirknsyqgarfrarii  
gvcvdcgrkhdkasrterkckvnntqsqnevahmlmhdpvkylnrkarafsnaemfaidlvmyt  
kerqlavdlaaerektrlarrhpmrspeetpehykfgmtakamlpdinavdvgnedsseypvs  
lsvsggvlrehhfi

>JN384022.1

mdtsgqtfisvnlsgdesntasteikavsseadrleflrkmpfiidalirknsyqgarfrarii  
gvcvdcgrkhdkasrterkckvnntqsqnevahmlmhdpvkylnrkarafsnaemfaidlvmyt  
kerqlavdlaaerektrlarrhpmrspeetpehykfgmtakamlpdinavdvgnedsseypvs  
lsvsggvlrehhfi

>JN384024.1

mdtsgqtfvsvnlsgdesntastkvenvkseadrleflrkmpfiidavlrktnyqgarfrarii  
gvcvdcgrkhdalkterkckvnntqsqnevahmlmhdpvkylnrkarafsnaemfaielvst  
kerqlavdlaaerektrlarrhpmrspeetpehykfgmtakamlpdinavdvgnedsseypvs  
lsvsggvlrehhfi

>JQ039913.1

mdtsgqtfvsvnlsgdesntastkvenvnseadrleflrkmpviidavlrktnyqgarfrarii  
gvcvdcgrkhdalkterkckvnntqsqnevahmlmhdpvkylnrkarafsnaemfaielvst  
kerqlavdlaaerektrlarrhpmrspeetpehykfgmtakamlpdinaadvgdseetsseypvs  
lsvsggvlrehhfi

>JQ819943.1

mdtsgqtfvsvnlsgdesntaisrvenvksetdrleflrkmpfiidavlrktnyqgarfrarii  
gvcvdcgrkhdalkterkckvnntqsqnevahmlmhdpvkylnrkarafsnaemfaielvst  
kerqlavdlaaerektrlarrhpmrspeetpehykfgmtakamlpelnavgvgdnedsseypvi  
lsvsggvlre

>JQ819944.1

mdtsgqtfisvnlsgdesntastevktvsleadrleflrkmpfiidtlirktnyqgarfrarii  
gvcvdcgrkhdkasrterkckvnntqsqnevahmlmhdpvkylnrkarafsnaemfaidlvmyt  
kerqlavdlaaerektrlarrhpmrspeetpehykfgitakamlpdinaidvgdnedsseypvf  
lsvsggvlrk

>JQ819945.1

mdtsgqtfvsvnlsgdesntaisrvenvkseadrleflrkmpfiidavlrktnyqgarfrarii  
gvcvdcgrkhdalkterkckvnntqsqnevahmlmhdpvkylnrkarafsnaemfaielvst  
kerqlavdlaaerektrlarrhpmrspeetpehykfgmtakamlpelnavgvgdnedsseypvs  
lsvsggvlre

>JQ819946.1

mdtsgqtfvsvnlsgdesntaisrvenvkseadrleflrkmpfiidavlrktnyqgarfrarii

gvcvdcgrkhdalkterkckvnntqsqnevahmlmhdvpkylnkrkarafsnaemfaielvlyt  
kekqlavdlaaerektrlarrhpmrspeetpehykfgmtakailpelnavgvgdnedtsseypvs  
lsvsggvltre

>JQ819947.1

mndtsgqifvsvnlssdesntaisrvenvkseadrleflrkmpnpliidalvrktnyqgarfrarii  
gvcvdcgrkhdalkterkckvnntqsqnevahmlmhdvpkylnkrkarafsnaemfaielvlyt  
kekqlavdlaaerektrlarrhpmrspeetpehykfgmttkamlpelnavgvgdnedtsseypvs  
lsvsggvltre

>JQ819948.1

mndtsgqtfvsvnlssdesntaisrvenvkseadrleflrkmpnpliidalvrktnyqgarfrarii  
gvcvdcgrkhdalkterkckvnntqsqnevahmlmhdvpkylnkrkarafsnaemfaielvlyt  
kekqlavdlaaerektrlarrhpmrspeeapehykfgmtakamlpelnavgvgdnedtssefpif  
lsvsggvltre

>JQ819952.1

mndtsgqtfvsvnlssdesntaisrvknvkseadrleflrkmpnpliidalvgktnyqgarfrarii  
gvcvdcgrkhdkavrterkckvnntqsqnevahmlmhdvpnylnkrkarafsnaemfaielflyt  
kekqlavdlaaerektrlarrhpmrspeetpehykfgmtakailpelnavgvgdnedtssdfpvf  
lsvsggvltre

>JQ819954.1

mndtsgqtfvsvnlssdesntaisrvenvkseadrleflrkmpnpliidalvrktnyqgarfrarii  
gvcvdcgrkhdalkterkckvnntqsqnevahmlmhdvpkylnkrkarafsnaemfaielvlyt  
kekqlavdlaaerektrlarrhpmrspeetpehykfgitakamlpdinaidvgdnedtsseypvs  
lsvsggvltre

>JQ819955.1

mddtsgqtfisvnlssdesntastevktivsleadrleflrkmpnftidalirktnyqgarfrarii  
gvcvdcgrkhdkasrterkckvnntqsqaevahmlmhdvpkylnkrkarafsnaemfaidlvmt  
kerqlavdlaaerektrlarrhpmrspeetpehykfgitakamlpdinaidvgdnedtsseypvs  
lsasggvltre

>JQ819960.1

mddtsgqtfisvnlssdesntastevktivsleadrleflrkmpnftidalirktnyqgarfrarii  
gvcvdcgrkhdkasrterkckvnntqsqaevahmlmhdvpkylnkrkarafsnaemfaidlvmt  
kerqlavdlaaerektrlarrhpmrspeetpehykfgitakamlpdinaidvgdnedtsseypvs  
lsvsggvltre

>JQ819963.1

mvdtsqgtfifsvnlssdesntastevktivsleadrleflrkmpfnidalirktnyqgarfrarii  
gvcvdcgrkhdkasrterkckvnntqsqaevahmlmhdvpkylnkrkarafsnaemfaidlvmt  
kerqlavdlaaerektrlarrhpmrspeetpehykfgitakamlpdinaidvgdnedtsseypvs  
lsvsggvltre

>JQ819964.1

mddtsgqtfifsvnlssdesntastevktivsleadrlddlrkmpfiidalirktnyqgarfrarii  
gvcvdcgrkhdkasrterkckvnntqsqaevahmlmhdvpkylnkrkarafsnaemfaidlvmt  
kerqlavdlaaereetrlarrhpmrspeetpehykfgitakamlpdinaidvgdnedtsseypvs  
lsvsggvltre

>JQ819965.1

mddtsgqtfisvnl sdesntastevktivsleadrleflrkmpftidalirktnyqgarfrarii  
gvcvdcgrkhdkasrterkckvnntqsgaevahmlmhdvpkylnkrkarafsnaemfaidlvmt  
kerqlavdlaaerektrlarrhpmrspeetpehykfgitakamlpdinaidvgdnedtsseypvs  
lsvsggvlre

>JQ819967.1

mddtsgqtfisvnl sdesntastevktivsleadrleflrkmpftidalirktnyqgahfrarii  
gvcvdcgrkhdkasrterkckvnntqsgaevahmlmhdvpkylnkrkarafsnaemfaidlvmt  
kerqlavdlaaerektrlarrhpmrspeetpehykfgitakamlpginaidvgdnedtsseypvs  
lsvsggvlre

>JQ819968.1

mddtsgqtfisvnl sdesntastevktivsleadrleflrkmpfiidalirktnyqgarfrarii  
gvcvdcgrkhdkasrterkckvsntqsgaevahmlmhdvpkylnkrkarafsnaerfaidlvmt  
kerqlavdlaaerektrlarrqpmrspeetpehykfgitakamlpdinaidvgdnedtsseypvs  
lsvsggvlre

>JQ819969.1

mddtsgqtfisvnl sdenntastevktivsleadrleflrkmpfiidalirktnyqgarfrarii  
gvcvdcgrkhdkasrterkckvnntqsgaevahmlmhdvpkylnkrkarafsnaemfaidlvmt  
kerqlavdlaaerektrlarrhpmrspeetpehykfgitakamlpdinaidvgdnedtsseypvs  
lsvsggvlre

>JQ819971.1

mddtsgqtfisvnl sdesntastevktivsleadrleflrkmpfiidalirktnyqgarfrarii  
gvcvdcgrkhdkasrterkckvnntqsgaevahmlmhdvpkylnkrkarafsnaemfaidlvmt  
kerqlavdlaaerektrlarrhpmrspeetpehykfgitakamlpdinaidvgdnedtsseypvs  
lsvsggvlre

>JQ819973.1

mddtsgqtfisvnl sdesntastevktivsleadrleflrkmpftidalirktnyqgarfrarii  
gvcvdcgrkhdkasrterkckvnntqsgaevahmlvhdpkylnkrkarafsnaemfaidlvmt  
kerqlavdlaaerektrlarrhpmrspeetpehykfgitakamlpdinaidvgdnedtsseypvs  
lsvsggvlre

>JQ819974.1

mddtsgqtfisvnl sdesntastevktivsldadrleflrkmpfiidalirktnyqgarfragii  
gvcvdcgrkhdkasrterkckvnntqsgaevahmlmhdvpkylnkrkarafsnaemfaidlvmt  
kerqlavdlaaerektrlarrhpmrspeetpehykfgitakamlpdinaidvgdnedtsseypvs  
lsvsggvlre

>JQ819976.1

mddtsgqtfisvnl sdesntastevktivsleadrleflrkmpfiinalirktnyqgarfrarii  
gvcvdcgrkhdkasrterkckvnntqsgaevahmlmhdvpkylnkrkarafsnaemfaidlvmt  
kerqlavdlaaerektrlarrhpmrspeetpehykfgitakamlpdinaidvgdnedtsseypvs  
lsvsggvlre

>JQ819979.1

mddtsgqtfisvnl sdesntastevktivsleadrleflrkmpftidalirktnyqgarfrarii  
gvcvdcgrkhdkasrterkckvnntqsgaevahmlmhdvpkylnkrkarafsnaemfaidlvmt  
kerqlavdlaaerektrlarrhpmrspeetpehyefgitakamlpdinaidvgdnedtsseypvs  
lsvsggvlre

>JQ819981.1

mdtsgqtfisvnlsgdesntastevktvsleadrlflrkmpftidalirktnyqgarfrarii  
gvcdvdcgrkhdkasrterkckvnntqsgaevahmlmhdvpvlylnkrkarafsnagmfaidlvmht  
kerqlavdlaaerektrlarrhpmrspeetpehykfgitakamlpdinaidvgdnedtsseypvs  
lsvsggvvre

>JQ819983.1

mdtsgqtfisvnlsgdesntastevktvsleadrlflrkmpfiidalirktnyqgarfrarii  
gvcdvdcgrkhdkasrterkckvnntqsgaevahmlmhdvpvrylnkrktrafsnagmfaidlvmht  
kerqlavdlaaerektrlarrhpmrspeetpehykfgitakamlpdinaidvgdnedtssgypvs  
lsvsggvvre

>JQ819987.1

mdtsgqtfisvnlsgdesntastevktvsleadrlflrkmpftidalirktnyqgarfrarii  
gvcdvdcgrkhdkasrterkckvnntqsgaevahmlmhdvpvlylnkrkarafsnagmfaidlvmht  
kerqlavdlaaerektrlarrhpmrspeetpehykfgitakamlpdinaidvgdnedtsseypvs  
lsvsggvvre

>JQ819988.1

mdtsgqtfisvnlsgdesntastevktvsleadrlflrkmpfiidalirktnyqgarfrarii  
gvcdvdcgrkhdkasrterkckvnntqsgaevahmlmhdvpvlylnkrkarafsnagmfaidlvmht  
kerqlavdlaaerektrlarrhpmrspeetpehykfgitakamlpdinaidvgdnedtsseypvs  
lsvscgvvre

>JQ819991.1

mdtsgqtfisvnlsgdesntastevktvsleadrlflrkmpftidalirktnyqgarfrarii  
gvcdvdcgrkhdkasrterkckvnntqsgaevahmlmhdvpvlylnkrkarafsnagmfaidlvmht  
kerqlavdlaaerektrlarrhpmrspeetpehykfgitakamlpdinaidvgdnedtsseypvs  
lsvsggvsre

>JQ819996.1

mdtsgqtfisvnlsgdesntastevktvsleadrlflrkmpfiidalirktnyqgarfrarii  
gvcdvdcgrkhdkasrterkckvnntqsgaevahmlmhdvpvlylnkrkarafsnagmfaidlvmht  
kerqlavdlaaerektrlarrhpmrspeetpehykfgitakamlpdinaidvgdnedtsseylvs  
lsvsggvvre

>JQ819997.1

mdtsgqtfisvnlsgdesntastevktvsleadrlflrkmpfiidalirktnyqgarfrarii  
gvcdvdcgrkhdkasrterkckvnntqsgaevahmlmhdvpvlylnkrkarafsnagmfaidlvmht  
kerqlavdlaaerektrlarrhpmrspeetpehykfgitakamlpdinaidvgdnedtsseypvs  
lsvsggvvre

>JQ820000.1

mdtsgqtfisvnlsgdesntasteaktvsleadrlflrkmpfiidalirktnyqgarfrarii  
gvcdvdcgrkhdkasrterkckvnntqsgaevahmlmhdvpvlylnkrkarafsnagmfaidlvmht  
kerqlavdlaaerektrlarrhpmrspeetpehykfgitakamlpdinaidvgdnedtsseypvs  
lsvsggvvre

>JQ820001.1

mdtsgqtfisvnlsgdesntastevktvsleadrlflrkmpfiidalirktnyqgarfrarii  
gvcdvdcgrkhdkasrterkckvnntqsgaevahmlmhdvpvlylnkrkarafsnagmfaidlvmht  
kerqlavdlaaerektrlarrhpmrspeetpehykfgitakamlpdinaidvgdnedtsseypvs



lsvsggvlre

>JQ820003.1

mddtsgqtfisvnlsgdesntastevktvsleadrlflrkmpftidalirktnyqgarfrarii  
gvcvdcgrkhdkasrterkckvnntqsgaevahmlmhdvpkylnkrkarafsnaemfaidlvmt  
kerqlavdlaaerektrlarrhpmrspeetpehykfgitakamlpdinaidvgdnedtsseypvs  
lsvsggvlre

>JQ820007.1

mddtsgqtfisvnlsgdesntastevktvsleadrlflrkmpfiidalirktnyqgarfrarii  
gvcvdcgrkhdkasrterkckvnntqsgaevahmlmhdvpkylnkrkarafsnaemfaidlvmt  
kerqlavdlaaerektrlarrhpmrspeetpehykfgitakamlpdinaidvgdnedtsseypvs  
lsvsggvlre

>JQ820008.1

mddtsgqtfisvnlsgdesntastevktvsleadrlflrkmpfiidalirktnyqgarfrarii  
gvcvdcgrkhdkasrterkckvnntqsgaevahmlvhdvpkylnkrkarafsnaemfaidlvmt  
kerqlavdlaaerektrlarrhpmrspeetpehykfgitakamlpdinaidvgdnedtsseypvs  
lsvsggvlre

>JQ820010.1

mgdtsgqtfisvnlsgdesntastevktvsleadrweflrkmpfiidalirktnyqgarfrarii  
gvcvdcgrkhdkasrterkckvnntqsgaevahmlmhdvpkylnkrkarafsnaemfaidlvmt  
kerqlavdlaaerektrlarrhpmrspeetrehykfgitakpmlpdinaidvgdnedtsseypvs  
lsvsggvlre

>JQ820013.1

mddtsgqtfisvnlsgdesntastevktvsleadrlflrkmpfidalirktnyqgarfrarii  
vcvdcgrkhdkasrterkckvnntqsgaevahmlmhdvpkylnkrkarafsnaemfaidlvmt  
erqlavdlaaerektrlarrhpmrspeetpehykfgitanamlpdinavdvgdnedtsseypvsl  
svsggvlre

>KC202886.1

mdstsgqtfvsvnlsgdesntastavrtvsseadrleflrkmpfiidalvrktnyqgarfrakii  
gvcvdcgrkhdkgkterkckvnntqsgnevahmlmhdvpkylnkgkarafsnaemfaidlvmt  
kekqlavnlaaerektrlarrhpmrspeetpefykfgitakamlpninavdvgdnedtsseypvs  
lsvsdgvlrehhfil

>KC202887.1

mnpfvidalirktsyqgarfrariiigvcvdcgrkhekgssrterkckvnntqsgnevahmlmhdvp  
kylskrkarafsnaemfaidlvmtkerqlavdlaaerektrlarkhpmrspeetpehykfgmta  
kamlpdinivdvgettktlfgdgvslsvsggvlrehhfil

>KC202888.1

mddtsgqtfisvnlsgdesntastevktvsseaerleflrkmpfvidalirktsyqgarfrarii  
gvcvdcgrkhekgssrterkckvnntqsgnevahmlmhdvpkylskrkarafsnaeiaidlvmt  
erqlavdlaaerektrlalntqcvlrkklnrikfgmtakamlpdinivdvgdnedtsseyrkses  
fwrvs

>KC202889.1

mddtsgqkgtpfrfcepftastevktvsseyrtvsseadtlgiltkneplyhrrfgtentvsrv  
knslsrknnrsmrrlgrkhdkgkterkckvnntqsgnevahmlmhdvpkylnkgkarafsnaem  
faidlvmtkekqlavnlaaerektrlarrhpmrspeetpefykfgitakamlpninavdvgdne

dtsseteesev

>KC202908.1

mdntsgqtfisvnlsgdesntastevktvsseadrleflrkmpfvidalirktsyqgarfrarii  
gvcvdcgrkhdkgsrterkckvnntqsqnevahmlmhdvpvkylskrkarafsnaemfaidlvm  
kerqlavdlaaerektrlarkhpmrspeetpehykfgmtakamlpdinvvdvgnedtsseypvs  
lsisggvltrehhfirsnh

>KC562141.1

mdytsgqtfvsvnlsgdesntastevktvsseadrleflqkmpfvidalirktsyqgarfrarii  
gvcvdcgrkhkglkterkckvnntqsqnevahmlmhdvpvkylnegkarafsnaemfaidlvm  
kerqlavnltarektrlarrhpmrspeetpehykfgmtakvmlpdidavdvddnedtlsecpvn  
lsvsggvltrehhfi

>KC562142.1

mddtsgqtfvsvnlsgdesntastevktvsleadrleflrkmpfiidalirktsyqgarfrarii  
gvcvdcgrkhdkasrterkckvnntqsqnevahmlmhdvpvkylnrkarafsnaemfaidlvm  
kerqlavdlaaerektrlarrhpmrspeetpehykfgmtakamlpdtnaidvgdnedtsseypvs  
lsvsggvltrehhfi

>KC562143.1

mdntsgqtfvsvnlsgdesntastevktvsleadrleflrkmpfiidalirktsyqgarfrarii  
gvcvdcgrkhdeasrterkckvnntqsqnevahmlmhdvpvkylnrkarafsnaemfaidlvm  
kerqlavdlaaerektrlarrhpmrspeetpehykfgmaakamlpdtnaidvgdnedtsseypvs  
lsvsggvltrehhfi

>KC562144.1

mdytsgqtfvsvnlsgdesntastevktvnleadrleflrkmpfiidalirktsyqgarfrarii  
gvcvdcgrkhdkasrterkckvnntqsqnevahmlmhdvpvkylnrkarafsnaemfaidlvm  
kerqlavdlaaerektrlarrhpmrspeetpehykfgmtakamlpdtnaidvgdnedtsseypvs  
lsvsggvltrehhfi

>KC562145.1

mddtsgqtfvsvnlsgdesntastevktvsseadrleflqkmpfvidalirktsyqgarfrarii  
gvcvdcgrkhkglkterkckvnntqsqnevahmlmhdvpvkylnegkarafsnaemfaidlvm  
kerqlavnltarektrlarrhpmrspeetpehykfgmtakvmlpdidavdvddnedtlsecpvn  
lsvsggvltrehhli

>KC562146.1

mdytsgqtfvsvnlsgdesntastevktvsseadrleflqkmpfvidalirktsyqgarfrarii  
gvcvdcgrkhkglkterkckvnntqsqnevahmlmhdvpvkylnegkarafsnaemfaidlvm  
kekqlavnltarektrlarrhpmrspeetpehykfgmtakamlpgidvvdvddnedtlseypvn  
lsvsggvltrehhfi

>KC577594.1

mdytsgqtfisvnlsgdesntasteikavsseadrleflrkmpfiidalirknnyqgarfrarii  
gvcvdcgrkhdkasrterkckvnntqsqnevahmlmhdvpvkylnrkarafsnaemfaidlvm  
kerqlavdlaaerektrlarrhpmrspeetpehykfgmtakamlpdtnavdvgnedtsseypvs  
lsvsggvltrehhfi

>AY652901.1

mdstsgqtfvsvnlsgdesntastavrtvsseadrleflrkmpfvidalvrktsyqgarfrakii  
gvcvdcgrkhdkglkterkckvnntqsqnevaaymlmhdvpvkylngkarafsnaemfaidlvm  
myt

kekqlavslaaerektrlarrhpmrspeetpehykfgmtakamlpdtnavdvgdnedtsseypvs  
lsvsdgvlrehhfi

>AY652902.1

mddtsgqtfvsvnlssdesntastrvenvkseadrleflrkmpfiidalvrktnyqgarfrarii  
gvcvdcgrkhdalkterkckvnntqsqnevahmlmhdpvkylnrkarafsnaetfaielvlyt  
kekqlavdlaaerekarlarrhpmrspeetpehykfgmtakamlpefnavgvgdiedtsseypvs  
lsvsggvlrehhfi

>AY652904.1

mdstngqtfvsvnlssdesntastavrtvsseadrleflrkmpfiidalirktsyqgarfrarii  
gvcvdcgrkhdkglrterkckvnntqsqnevahmlmhdpvkylnegkarafsnaemfaidlvmlyt  
kekqladdlaaerektrlarrhpmrspeetpehykfgmtakamipdidvvyvgdnedtsseypvs  
lgvsdgvlrehhfv

>AY652906.1

mddtngqtfvsvnlssdesntastkvenvkseadrleflrkmpfivdalvrktnyqgarfrarii  
gvcvdcgrkhdalkterkckvnntqsqnevahmlmhdpvkylnrkarafsnaemfaielvlyt  
kerqlavdlaaerektrlarrhtirspeetpehykfgmtakamlpninavdvgdneetsseypvs  
lsvsggvlrehhfi

>KF724132.1

mddtsgqtfvsvnlssdesntastkvenvkseadrleflrkmpfivdalvrktnyqgarfrarii  
gvcvdcgrkhdalkterkckvnntqsqnevahmlmhdpvkylnrkarafsnaemfaielvlyt  
kerqlavdlaaerektrlarrhpirspeetpehykfgmtakamlpdinavdvgdneetsseypvs  
lsvsggvlrehhfi

>KF724135.1

mddtsgqtfvsvnlssdesntastkvenvkseadrleflrkmpfivdalvrktnyqgarfrarii  
gvcvdcgrkhdalkterkckvnntqsqnevahmlmhdpvkylnrkarafsnaemfaielvlyt  
kerqlavdlaaerektrlarrhpirspeetpehykfgmtakamlpdinavdvgdneetsseypvs  
lsvsggvlrehhfi

>KF724136.1

mddtsgqtfvsvnlssdesntastkvenvkseadrleflrkmpfivdalvrktnyqgarfrarii  
gvcvdcgrkhdalkterkckvnntqsqnevahmlmhdpvkylnrkarafsnaemfaielvlyt  
kerqlavdlaaerektrlasrhpirspeetpehykfgmtakamlpdinavdvgdneetsseypvs  
lsvsggvlrehhfi

>KF724137.1

mddtsgqtfvsvnlssdesntastkvenvkseadrleflrkmpfivdalvrktnyqgarfrarii  
gvcvdcgrkhekalkterkckvnntqsqnevahmlmhdpvkylnrkarafsnaemfaielvlyt  
kerqlavdlaaerektrlarrhpirspeetpehykfgmtakamlpdinavdvgdneetsseypvs  
lsvsggvlrehhfi

>KF724141.1

mddtsgqtfvsvnlssdesntastkvenvkseadrldflrkmpfivdalvrktnyqgarfrarii  
gvcvdcgrkhdalkterkckvnntqsqnevahmlmhdpvkylnrkarafsnaemfaielvlyt  
kerqlavdlaaerektrlarrhpirspeetpehykfgmtakamlpdinavdvgdneetsseypvs  
lsvsggvlrehhfi

>KF724146.1

mddtsgqtfisvnlssdesntastevktsseadrleflrkmpfivdalirktsyqgarfrarii

gvcvdcgrkhkgsrterkckvnntqsqnevahmlmhdvpkylskrkarafsnaemfaidlvmht  
kerqlavdlaaerektrlarkhpmrspeetpehykfgmtakamlpdinvvngdnedtsseypvs  
lsvsggvlrehhfi

>KC774010.1

mddtsgqtfisvnlssdesntasteikavsseadrleflrkmpfiidalirknsyqgarfrarii  
gvcvdcgrkhdkasrterkckfnntqsqnevahmlmhdvpkylnkrkarafsnaemfaidlvmht  
kerqlavdlaaerektrlarrhpmrspeetpehykfgmtakamlpdinavdvgdnedtsseypvs  
lsvsggvlrehhfi

>KC774011.1

mddtsgqtfvsvnlssdesntastkvenvkseadrldflrkmpfivdalvrktnyqgarfrarii  
gvcvdcgrkhdkalkterkckvyntqsqnevahmlmhdvpkylnkrkarafsnaemfaielvlyt  
kerqlavdlaaerektrlarrhpirspeetpehykfgmtakamlpdinavdvgdneetsseypvs  
lsvsggvlrehhfi

>KC774012.1

mddtsgqtfisvnlssdesntasteikavsseadrleflrkmpliidalirknsyqgarfrarii  
gvcvdcgrkhdkasrterkckvnntqsqnevahmlmhdvpkylnkrkarafsnaemfaidlvmht  
kerqlavdlaaerektrlarrhpmrspeetpehykfgmtakamlpdinavdvgdnedtsseypvs  
lsvsggvlrehhfi

>KC774013.1

mddtsgqtfvsvnlssdesntastkvenvkseadrldflrkmpfivdalvrktnyqgarfrarii  
gvcvdcgrkhdkalkterkckvnntqsqnevahmlmhdvpkylnkrkarafsnaemfaielvlyt  
kerqlavdlaaerektrlarrhpirspeetpehykfgmtakamlpdinavdvgdneetsseypvs  
lsvsggvlrehhfi

>KC774014.1

mddtsgqtfisvnlssdesntasteikavsseadrleflrkmpfiidalirknsyqgarfrarii  
gvcvdcgrkhdkasrterkckvnntqsqnevahmlmhdvpkylnkrkarafsnaemfaidlvmht  
kerqlavdlaaerektrlarrhpmrspeetpehykfgmtakamlpdinavdvgdnedtsseypvs  
lsvsggvlrehhfi

>KC774015.1

mddtsgqtfisvnlssdesntasteikavsseadrleflrkmpfiidalirknsyqgarfrarii  
gvcvdcgrkhdkasrterkckvnntqsqnevahmlmhdvpkylnkgkarafsnaemfaidlvmht  
kerqlavdlaaerektrlarrhpmrspeetpehykfgmtakamlpdinavdvgdnedtsseypvs  
lsisggvlrehhfi

>KC774016.1

mdntsgqtfvsvnlssdesntattdvkpsseadrldflqkmdpiiidalirknsyqgarfrarii  
gvcvdcgrkhdkglkterkckvnntqsqnevahmlmhdvpkylnkrkarafanaeifaidlvmht  
kerqlavdlaaerektrlarrhpmrspeetpehykfgmtakamlpdinavdvgdneetsseypvs  
lsvsggvlrehhfi

>KC774017.1

mddtsgqtfvsvnlssdesntastkvenvkseadrleflrkmpfivdalvrktnyqgarfrarii  
gvcvdcgrkhdkalkterkckvnntqsqnevahmlmhdvpkylnkrkarafsnaemfaielvlyt  
kerqlavdlaaerektrlarrhpirspeetpehykfgmtakamlpdinavdvgdneetsseypvs  
lsvsggvlrehhfi

>KF913715.1

mdytsqgtfvsvnlsdesntastevktsseadrleflrkmpnlvidalirktsyqgarfrarii  
gvcvdcgrkhkglktereckvnntqsqnevahmlmhdpvkylnegkarafsnaemfaidlvmyt  
kekqlavnltaerektrlarrhpmrspeetpehykfgmtakamlpgidvvdvddnedtlseypvn  
lsvsggvlrehhfi

>KF913716.1

mdntsgqtfisvnlsdesntasteikavsseadrleflrkmpfiidalirknnyqgarfrarii  
gvcvdcgrkhdkasrterkckvnntqsqnevahmlmhdpvkylnrkarafsnaemfaidlvmlt  
kerqlavdlaaerektrlarrhpmrspeetpehykfgmtakamlpdtnavdvgdnedtsseypvs  
lsvsggvlrehhfi

>KF913717.1

mdntsgqtfisvnlsdesntastevetvsleadrleflrkmpfiidalirrtsyqgarfrarii  
gvcvdcgrkhdeasrterkckvnntqsqnevahmlmhdpvkylnrkarafsnaemfaidlvmht  
kerqlavdlaaerektrlarrhpmrspeetpehykfgmaakamlpdtnaidvgdnegtsseypvs  
lsvsggvlrehhfi

>KF913718.1

mdytsqgtfnsvnlsdesntastevktsleadrleflrkmsfiidalirktsyqgarfrarii  
gvcvdcgrkhdkasrterkckvnntqsqnevahmlmhdpvkylnrkarafsnaemfaidlvmht  
kerqlavdlaaerektrlarrhpmrspeetpehykfgmtakamlpdtnaidvgdiedtsseypvs  
lsvsggvlrehhfi

>AY750732.1

mddtsgqtfisvnlsdesntastevktsseadrleflrkmpfiidalirktsyqgarfrarii  
gvcvdcgrkhdkalrterkckvnntqsqnevahmlmhdpveylnrkarafskaemfaidlvmht  
kerqlavdlaaerektrlarrhpmrspeetpehykfgmtakamlpdinaidvgdnedtsseypvs  
lsvsggvlrehhfil

>AY750733.1

mddtsgqtfisvnlsdesntasteikavsseadrleflrkmpftidalirknsyqgarfrarii  
gvcvdcgrkhdkasrterkckvtntqsqnevahmlmhdpvkylnerkarafsnaemfaidlvmht  
kerqlavdlaaerektrlarrhpmrspeetpehykfgmtakamlpdinavdvgdnedtsseypvs  
lsvsggvlrehhfil

>AY750735.1

mddtsgqtfisvnlsdesntastevktsseadrleflrkmpfiidalirktsyqgarfrarii  
gvcvdcgrkhdkgsrterkckvnntqsqnevahmlmhdpvkylnrkarafsnaemfaidlvmht  
kekqlavdlaaerektrlarrhpmrspeetpeyykfgmtakamlpdinaidvgdnedtssdypvs  
lsvsggvlrehhfil

>AY750736.1

mndtsgqtfvsvnlsdesntastrvenvkseadrldflrkmpliidalvrktnyqgarfrarii  
gvcvdcgrkhdkalkterkckvnntqsqnevahmlmhdpvkylnrkarafsnaemfaielvlyt  
kekqlavdlaaerektrlarrhpmrspeetpehykfgmtakvmlpelnavgvgdnedtsseypvs  
lsvsggvlrehhfil

>AY750737.1

mdstsgqtfvsvnlsdesntastavrtvsseadrleflrkmpfiidalvrktnyqgarfrakii  
gvcvdcgrkhdkglkterkckvnntqsqnevahmlmhdpveylnkgkarafsnaemfaidlvmyt  
kekqlavnlaaerektslarrhpmrspeetpefykfgitakamlpninavdvgdnedtsseypvs  
lsvsdgvlrehhfil

>AY750738.1

mddtsgqtfisvnl sdesntasteikavsseadrleflrkmpfiidalirknsyqgarfrerii  
gvcvdcgrkhdkasrterkckvnntqsqnevahmlmhdvpviylnrkarafsnaemfaidlvmht  
kerqlavdlaaerektrlarrhpmrspeetpehykfgmtakamlpdinavdvgnedtsseypvs  
lsvsggvlrehhfil

>AY750739.1

mddtsgqtfisvnl sdesntastevktsseadrleflrkmpfiidalirktsyqgarfrarii  
gvcvdcgrkhdkglkterkckvnntqsqnevahmlmhdvpkylsegkarafsnaemfaidlvmht  
kekqlavnltarektrlarrhpmrspeetpehykfgmtakamlpdinavvvgnedtsseypvs  
lsisdgvlrehhfil

>AY750740.1

mddtsgqtfisvnl sdesntastevktsseaerleflrkmpfvidalirktsyqgarfrarii  
gvcvdcgrkhhekgsrterkckvnntqsqnevahmlmhdvpkylskrkarafsnaemfaidlvmht  
kerqlavdlaaerektrlarkhpmrspeetpehykfgmtakamlpdinivdvgnedtsseypvs  
lsvsggvlrehhfil

>AY750741.1

mddtsgqtfvsvnl sdesntastavrtvsseadrleflrkmpfildalirknnyqgarfrarii  
gvcvdcgrkhdkasrterkckvnntqsqnevahmlmhdvpkylnrkarafsnaemfaidlvmht  
kerqlavdlaaerektrlarrhpmrspeetpehykfgitakamlpdinavdvgnedtsseypvs  
lsvsdgvlrehhfil

>AY750742.1

mddtsgqtfisvnl sdesntasteikavsseadrleflrkmpfiidalirknnyqgarfrarii  
gvcvdcgrkhdkasrterkckvnntqsqnevahmlmhdvpkylnrkarafsnaemfaidlvmht  
kerqlavdlaaerektrlarrhpmrspeetpehykfgmtakamlpdinavdvgnedtsseypvs  
lsvsggvlrehhfil

>AY750743.1

mdstsgqtfvsvnl sdesntastavetvnseadrleflrkmpfiidalvrktnyqgarfrakii  
gvcvdcgrkhdkglkterkckvnntqsqnevahmlmhdvpveylngkarafskaemfaidlvmht  
kekqlavnlaaerektrlarrhpmrspeetpehykfgmtakamlpdinavdvgnedtsseypvs  
lsvsdgvlrehhfil

>AY750744.1

mddtsgqtfisvnl sdesntasteikavsseadrleflrkmpftidalirknsyqgarfrarii  
gvcvdcgrkhdkasrterkckvnntqsqnevahmlmhdvpkylnerkarafsnaemfaidlvmht  
kerqlavdlaaerektrlarrhpmrspeetpehykfgmtakamlpninavdvgnedtsseypvs  
lsvsdgvlrehhfil

>AY750745.1

mdstsgqtfisvnl sdesntastevktsseadrleflrkmpfvidalirktsyqgarfrarii  
gvcvdcgrkhhekgsrterkckvnntqsqnevahmlmhdvpkylskrkarafsnaemfaidlvmht  
kerqlavdlaaerektrlarkhpmrspeetpehykfgmtakamlpdinvvnvgnedtsseypvs  
lsvsggvlrehhfil

>AY750746.1

mddtsgqtfisvnl sdesntastevktsseadrleflrkmpfiidalirktsyqgarfrarii  
gvcvdcgrkhdkgsrterkckvnntqsqnevahmlmhdvpkylnrkarafsnaemfaidlvmht  
kekqlavdlaaerektrlarrhpmrspeetpeyykfgmtakamlpdinaidvgdnedtsseypvs

lsvsggvlrehhfil

>AY750747.1

mndtsgqtfvsvnlsgdesntastrvenvkseadrldflrkmpfliidalvrktnyqgarfrarii  
gvcvdcgrkhdalkterkckvnntqsqnevahmlmhdvpkylnkrkarafsnaemfaielvlyt  
kekqlavelaaerektrlarrhpmrspeetpehykfgmtakvmlpelnavgvgdnedtsseypvs  
lsvsggvlrehhfil

>AY750748.1

mndtsgqtfvsvnlsgdesntastavrtvsseadrleflrkmpfvidalvrktsyqgarfrakii  
gvcvdcgrkhdkgkterkckvnntqsqnevahmlmhdvpkylnkrkarafsnaemfaidlvmyt  
kekqlavnlaaerektrlarrhpmrspeetpehykfgmtakamlpdinavdvgdnedtsseypvs  
lsvsdgvlrehhfil

>AY750749.1

mndtsgqtfvsvnlsgdesntastavrtvsseadrleflrkmpfiidalvrktnyqgarfrakii  
gvcvdcgrkhdkgkterkckvnntqsqnevahmlmhdpvveylngkarafsnaemfaidlvmyt  
kekqlavnlaaerektrlarrhpmrspeetpefykfgitakamlpninavdvgdnedtsseypvs  
lsvsdgvlrehhfil

>AY750750.1

mdtsgqtfisvnlsgdesntasteikavsseadrleflrkmpfiidaltrknsyqgarfrarii  
gvcvdcgrkhdkasrterkckvnntqsqnevahmlmhdpvviylngkarafsnaemfaidlvmyt  
kerqlavdlaaerektrlarrhpmrspeetpehykfgmtakamlpdinavdvgdnedtsseypvs  
lsvsggvlrehhfil

>AY750751.1

mndtsgqtfvsvnlsgdesntastavrtvsseadrleflrkmpfiidalvrktnyqgarfrakii  
gvcvdcgrkhdkgkterkckvnntqsqnevahmlmhdvpkylnkgkarafsnaemfaidlvmyt  
kekqlavnlaaerektrlarrhpmrspeetpefykfgitakamlpninavdvgdnedtsseypvs  
lsvsdgvlrehhfil

>KJ094313.1

mndtsgqtfvsvnlsgdesntastevktvssetdrleflqkmpfvidalirktsyqgarfrarii  
gvcvdcgrkhkngkterkckvnntqsqnevahmlmhdvpkylnegkarafsnaemfaidlvmyt  
kerqlavnltaerektrlarrhpmrspeetpehykfgmtakamlpdvdivnvddnedtlseypvn  
lsvsggvlrehhfi

>AY962348.1

mdtsgqtlisvnlsgdesntastevktvsseaerleflrkmpfvidalirktsyqgarfrarii  
gvcvdcgrkhekgsrterkckvnntqsqnevahmlmhdpvveylskrkarafsnaemfaidlvmyt  
kerqlavdlaaerektrlarkhpmrspeetpehykfgmtakamlpdinivdvgdnedtsseypvs  
lrvsggvlrehhfil

>AY962349.1

mdtsgqtfvsvnlsgdesntastrvenvkseadrleflrkmpfliidalvrktnyqgarfrarii  
gvcvdcgrkhdalkterkckvnntqsqnevahmlmhdvpkylnkrkarafsnaemfaielvlyt  
kekqlavdlaaerektrlarrhpmrspeetpehykfgltakamlpelnavgvgdnedsseypvs  
lsvsggvlrehhfil

>AY962350.1

mdtsgqtfisvnlsgdesntastevktvsseadrleflrkmpfiidalirktsyqgarfrarii  
gvcvdcgrkhekgsrterkckvnntqsqnevahmlmhdpvveylskrkarafsnaemfaidlvmyt

kerqlavdlaaerektrlarkhpmrspeetpehykfgmtakamlpdvnvvdvgdnedtsseypvs  
lrvsggvlrehhfil

>AY962351.1

mddtsgqtfvsmnlsdesntastavrtvsseadrleflrkmpfiidalvrktnyqgarfrakii  
gvcvdcgrkhdkglkterkckvnntqsqnevahmlmhdpvkylngkarafsnaemfaidlvm  
kekqlavnlaaerektrlarrhpmrspeetpefykfgitakamlpninavdvvgdnedtsseypvs  
lsvsggvlrehhfil

>AY962355.1

mddtsgqtlisvnlssdesntastevktvsseaerleflrkmpfvidalirktsyqgarfrarii  
gvcvdcgrkhdkgkterkckvnntqsqnevahmlmhdpveylskrkaraafsnaemfaidlvm  
kerqlavdlaaerektrlarrhpmrspeetpehykfgltakamlpelnavgvgdnedtsseypvs  
lsvsggvlrehhfil

>AY962356.1

mddtsgqtfisvnlssdesntastevktvsseadrleflrkmpfvidalirktsyqgarfrarii  
gvcvdcgkghdkgkterkckvnntqsqnevahmlmhdpvkylngkarafsnaemfaielvlyt  
kerqlavdlaaerektrlarkhpmrspeetpehykfgmtakamlpdvnvvdvgdnedtsseypvs  
lsisggvlrehhfil

>AY962357.1

mddtsgqtfvsvnlssdesntastrvenvkseadrleflrkmppliidalarktnyqgarfrarii  
gvcvdcgkghdkalkkterkckvnntqsqnevahmlmhdpvkylngkarafsnakmfaielvlyt  
kekqlavdlaaerektrlarrhpmrspeetpehykfgltakamlpelnavgvgdnedtsseypvs  
lsvsggvlrehhfil

>AY962358.1

mddtsgqtfvsvnlssdesntastrvenvkseadrleflrkmppliidalvrktnyqgarfrarii  
gvcvdcgkghdkalkkterkckvnntqsqnevahmlmhdpvkylngkarafsnakmfaielvlyt  
kekqlavdlaaerektrlarkhpmrspeetpehykfgmtakamlpdinivdvgnentsseypvs  
lrvsggvlrehhfil

>AY962359.1

mddtsgqtfvsvnlssdesntastavrtvsseadrleflrkmpfiidalvrktnyqgarfrakii  
gvcvdcgrkhdkglkterkckvnntqsqnevahmlmhdpvkylngkarafsnaemfaidlvm  
kekqlavnlaaerektrlarrhpmrspeetpefykfgitakamlpninavdvvgdnedtsseypvs  
lsvsdgvlrehhfil

>AY962360.1

mddtsgqtfvsvnlssdesntastrvenvkseadrleflrkmppliidalvrktnyqgarfrakii  
gvcvdcgkghdkalkkterkckvnntqsqnevahmlmhdpvkylngkarafsnakmfaielvlyt  
kekqlavdlaaerektrlarrhpmrspeetpehykfgltakamlpelnavgvgdndktsseypvs  
lsvsggvlrehhfil

>AY962361.1

mddtsgqtfvsmnlsdesntastavrtvsseadrleflrkmpfiidalvrktnyqgarfrakii  
gvcvdcgrkhdkglkterkckvnntqsqnevahmlmhdpvkylngkarafsnaemfaidlvm  
kekqlavnlaaerektrlarrhpmrspeetpefykfgitakamlpninavdvvgdnedtsseypvs  
lsvsdgvlrehhfil

>AY962362.1

mddtsgqtfvsvnlssdesntastrvenvkseadrleflrkmppliidalvrktnyqgarfrarii



gvcvdcgrkhdalkterkckvnntqsqnevahmlmhdvpkylnkrkarafsnakmfaielvlyt  
kekqlavdlaaerektrlarrhpmrspeetpehykfgltakamlpelnavgvgdnedtsseypvs  
lsvsggvlrehhfil

>AY962363.1

mddtsgqtlisvnlssdesntastevktvsseaerleflrkmpfvidalirktsyqgarfrarii  
gvcvdcgkkhkgsrterkckvnntqsqnevahmlmhdvpveylskrkarafsnaemfaidlvm  
kerqlavdlaaerektrlarkhpmrspeetpehykfgmtskamlpdinivdvgdnedtsseypvs  
lrvsggvlrehhfil

>AY962365.1

mddtsgqtfvsvnlssdesntastkvenvkseadrleflrkmpplvidalvrktnyqgarfrarii  
gvcvdcgkkhdkalkterkckvnntqsqnevahmlmhdvpkylnkrkarafsnakmfaielglyt  
kekqlavdlaaerektrlarkhpmrspeetpehykfgltakailpdlnavgvvgdnedtsseypvs  
lsvsggvlrehhfil

>AY962368.1

mddtsgqtlisvnlssdesntastevktvsseaerleflrkmpfvidalirktsyqgarfrarii  
gvcvdcgkkhkgsrterkckvnntqsqnevahmlmhdvpveylskrkarafsnaemfaidlvm  
kerqlavdlaaerektrlarkhpmrspeetpehykfgmtakamlpdvvnvvdvgdnedtsseypvs  
lsisggvlrehhfil

>AY962369.1

mddtsgqtlisvnlssdesntastevktvsseaerleflrkmpfvidalirktsyqgarfrarii  
gvcvdcgkkhkgsrterkckvnntqsqnevahmlmhdvpveylskrkarafsnaemfaidlvm  
kerqlavdlaaerektrlarkhpmrspeetpehykfgmtakamlpdinivdvgdnedtsseypvs  
lrvsggvlrehhfil

>AY962370.1

mddtsgqtlisvnlssdesntastevktvsseaerleflrkmpfvidalirktsyqgarfrar  
it gvcvdcgkkhkgsrterkckvnntqsqnevahmlmhdvpveylskrkarafsnaemfaidlvm  
kerqlavdlaaerektrlarkhpmrspeetpehykfgmtakamlpdinivdvgdnedtsseypvs  
lrvsggvlrehhfil

>AY962373.1

mddtsgqtfvsvnlssdesntastrvenvkseadrleflrkmppliidalvrktnyqgarfrarii  
gvcvdcgkkhdkalkterkckvnntqsqnevahmlmhdvpkylnkrkarafsnakmfaielvlyt  
kekqlavdlaaerektrlarkhpmrspeetpehykfgltakamlpelnavgvgdnedtsseypvs  
lsvsggvlrehhfil

>AY962374.1

mddtsgqtlisvnlssdesntastevktvsseaerleflrkmpfvidalirktsyqgarfrarii  
gvcvdcgkkhkgsrterkckvnntqsqnevahmlmhdvpveylskrkarafsnaemfaidlvm  
kerqlavdlaaerektrlarkhpmrspeetpehykfgmtakamlpginivdvgdnedtsseypvs  
lrvsggvlrehhfil

>AY962375.1

mddtsgqtfvsvnlssdesntastrvenvkseadrleflrkmppliidalvrktnyqgarfrarii  
gvcvdcgrkhdalkalkterkckvnntqsqnevahmlmhdvpkylnkrkarafsnakmfaielvlyt  
kekqlavdlaaerektrlarrhpmrspeetpehykfgltakamlpelnavgvgdnedtsseypvs  
lsvsggalrehhfil

>AY962376.1

mddtsgqtfvsvnl sdesntastrvenvkseadrleflrkmpfliidalvrktnyqgarfrarii  
gvcvdcgk khdkalkterkckvnntqsqnevahmlmhdvpv kylnkrkarafsnakmfaielvlyt  
kekqlavdlaaerektrlarrhpmrspeetpehykfgltakamlpelnavgvgdnedtsseypvs  
lsvsggvlrehhfil

>AY962377.1

mddtsgqtlisvnl sdesntastevktvsseaerleflrkmpfvvdalirktsyqgarfrarii  
gvcvdcgk khekgsrterkckvnntqsqnevahmlmhdvpveylskrkarafснаemfaidlvm yt  
kerqlavdlaaerektrlarkhpmrspeetpehykfgmtakamlpdinivdvgdnedsseypvs  
lrvsggvlrehhfil

>AY962378.1

mddtsgqtlisvnl sdesntastevktvsseaerleflrkmpfvvdalirktsyqgarfrarii  
gvcvdcgk khekgsrterkckvnntqsqnevahmlmhdvpveylskrkarafснаemfaidlvm yt  
kesqlavdlaaerektrlarkhpmrspeetpehykfgmtakamlpdinivdvgdnedsseypvs  
lrvsggvlrehhfil

>AY962380.1

mddtsgqtfvsvnl sdesntastrvenvkseadrleflrkmpfliidalvrktnyqgarfrarii  
gvcvdc k khdkalkterkckvnntqsqnevahmlmhdvpv kylnkrkarafsnakmfaielvlyt  
kekqlavdlaaerektrlarrhpmrspeetpehykfgmtakamlpdinivdvgdnedsseypvs  
lrvsggvlrehhfil

>AY962382.1

mddtsgqtfisvnl sdesntastrvenakseadrleflrkmpfliidalvrktnyqgarfrarii  
gvcvdcgk khdkalkterkckvnntqsqnevahmlmhdvpv kylnkrkarafsnakmfaielvlyt  
kekqlavdlaaerektrlarrhpmrspeetpehykfgltakailpelnavgvgdnedtsseypvs  
lsvsggvlrehhfil

>AY962383.1

mddtsgqtlisvnl sdesdtastevktvsseaerleflrkmpnfvidalirktsyqgarfrarii  
gvcvdcgk khekgsrterkckvnntqsqnevahmlmhdvpveylskrkarafснаemfaidlvm yt  
kerqlvvdlaaerektrlarkhpmrspeetpehykfgmtakamlpdinivdvgdnedsseypvs  
lrvsggvlrehhfil

>AY962385.1

mddtsgqtlisvnl sdesntastevktvsseaerleflrkmpnfvidalirktsyqgarfrarii  
gvcvdcgk khekgsrterkckvnntqsqnevahmlmhdvpveylskrkarafснаemfaidlvm yt  
kerqlavdlaaerektrlarkhsmrspeetpehykfgmtakamlpdinivdvgdnentsseypvs  
lrvsggvlrehhfil

>AY962386.1

mddtsgqtfvsvnl sdesntastrvenvkseadrleflrkmpfliidalvrktnyqgarfrarii  
gvcvdcgk khdkalkterkckvnntqsqnevahmlmhdvpv kylnkrkarafsnagmfaielvlt  
kekqlavdlaaerektrlarrhpmrspeetpehykfgltakailpelnavgvgdnedtsseypvs  
lsvsggvlrehhfil

>AY962388.1

mddtsgqtfvsvnl sdesntastrvenvkseadrleflrkmpfliidalvrktnyqgarfrarii  
gvcvdcgk khdkalkterkykvnntqsqnevahmlmhdvpv kylnkrkarafснаemfaielvlyt  
kekqlavdlaaerektrlarkhpmrspeetpehykfgltakailpelnavgvgdnentsseypvs  
lsvsggvlrehhfil

>KP284579.1

mddtsgqtfvsvnlsgdesntastkvenvkseadrleflrkmpfiivdalvrktnyqgarfrarii  
gvcvdcgrkxhdkalkterkckvnntqsqnevahmlmhdvpkylnkrkarafsnaemfaielvlyt  
kerqlavdlaaerektrrlarrhpirspeetpehykfgmtakamlpdinavdvgdneetsseypvs  
lsvsggvlrehhfi

>KP284580.1

mddtsgqtfvsvnlsgdesntaisrvenvkseadrleflrkmpfiidalirktnyqgarfrarii  
gvcvdcgrkxhdkapkerkckvnntqsqnevahmlmhdvpkylnkrkarafsnaetfaielvmht  
kekqlavdlaaerektrrlarrhpmrspeetpehykfgitakamlpdinaidvgdnedtsseypvs  
lsvssgvlrehhfi

>KP284581.1

mddtsgqtfisvnlsgdesntastevktvsseadrleflrkmpfiidalirktnyqgarfrarii  
gvcvdcgrkxhekgsrterkckvnntqsqnevahmlmhdvpkylnkrkarafsnaemfaidlvmyt  
kerqlavdlaaerektrrlarkhpmrspeetpehykfgmtakamlpdvnnvdvgdnedtsseypvs  
lsisggvlrehhfi

>DQ443744.1

tfvsvdfsgdesntastrvenvnseadrleflrkmpfiidalvrktnyqgarfrariigvcvdcg  
rkxhdkalkterkckvnntqsqnevahmlmhdvpkylnkrkarafsnaemfaielvlytkekqlav  
dlaaerektrrlarrhpmrspeetpeyykfgmtakamlpelnavdvgdneetsseypvslsfagvv  
1

>DQ443745.1

tfvsvnlsgdesntastkvenvkseadrleflrkmpfiidalvrktnyqgarfrariigvcvdcg  
rkxhdkalkterkckvnntqsqnevahmlmhdvpkylnkrkarafsnaemfaielvlhtkerqlav  
dlaaerektrrlarrhpmrspeetpehykfgmtakailpdinaidvgdneetsseypvslsvsggv  
1

>DQ443746.1

tfvsvnlsgdesntastavrtvsseadrleflrkmpfiidalvrktnyqgarfrakiigvcvdcg  
rkxhdkglkterkckvnntqsqnevahmlmhdvpkylnkgkarafsnaemfaidlvmytkerqlav  
nlaaerektrrlarrhpmrspeetpeyykfgitakamlpdinavdvgdneetsseypvslsvsggv  
1

>DQ443747.1

tfvsvnlsgdesntastavrtvsseadrleflqkmpfiidalvrktnyqgarfrakiigvcvdcg  
rkxhdkglkterkckvnntqsqnevahmlmhdvpkylnkgkarafsnaemfaidlvmytkekqlav  
nlaaerektrrlarrhpmrspeetpefykfgitakamlpninavdvgdnedtsseypvslsvsdgv  
1

>DQ443748.1

tfvsvnlsgdesntastavrtvsseadrleflrkmpfiidalvrktnyqgarfrakiigvcvdcg  
rkxhdkglkterkckvnntqsqnevahmlmhdvpkylnkgkarafsnaemfaidlvmytkekqlav  
nlaaerektrrlarrhpmrspeetpefykfgitakamlpninavdvgdnedtssecpvslivsdgv  
1

>DQ443749.1

tfvsvnlsgdesntasiavrtvsseadrleflrkmpfiidalvrktnyqgarfrakiigvcvdcg  
rkxhdkglkterkckvnntqsqnevahmlmhdvpkylnkgkarafsnaemfaidlvmytkekqlav  
dlaaerektrrlarrhpmrspeetpefykfgitakamlpninavdvgdnedtsseypvslsvsdgv

1

>DQ443750.1

tfvsvnl sdesntastavrtvsseadrleflrkmpfiidalvrktnyqgarfrakiigvcvdcg  
rkhdkg lkterkckvnntqsqnevahmlmhdvpkyl nkgkarafsnaemfaidl vmytkerqlav  
nlaaerektrlarrhpmrspeetpefykfgitakamlpninavdvgnedtsseypvslsvsdgv  
1

>DQ443751.1

tfvsvnl sdesntastavrtvsseadrleflrkmpfiidalvrktnyqgarfrakiigvcvdcg  
rkhdkg lkterkckvnntqsqnevahmlmhdvpkyl nkgkarafsnaemfaidl vmytkeqlav  
nlaaerektrlarrhpmrspeetpefykfgitakamlpninavdvgnedtsseypvslsvsdgv  
1

>KP268290.1

mdtsgqtfvsvnl sdesntastevktsleadrleflrkmpftidalirktt yqgarfrarim  
gvcvdcgrkhdkasrterkckvnntqsqnevahmlmhdvpkyl kerkarafsnaemfaidl vmht  
kerqlavdlaaerertrlarrhpmrspeetpehykfgmtakamlpdinaidvgdn

>KP268297.1

mdtsgqtfvsvnl sdesntastevktsleadrleflrkmpftidalirktt yqgarfrarim  
gvcvdcgrkhdkasraerkckvnntqsqnevahmlmhdvpkyl kerkarafsnaemfaidl vmht  
kerqlavdlaaerertrlarrhpmrspeetpehykfgmtakamlpdinaidvgdn

>KP268298.1

mdtsgqtfvsvnl sdesntastavrtvsseadrleflrkmpfvidalvrktsyqgarfrakii  
gvcvdcgrkhekgsrterkckvnntqsqnevahmlmhdvpkyl skrkarafsnaemfaidl vmyt  
kerqlavdlaaerektrlarkhpmrspeetpehykfgmtakamlpdinavdvgn

>KP268300.1

mdtsgqtfisvnl sdesntastevktsseaerleflrkmpfvidaliretsyqgarfrarii  
gvcvdcgrkhekgsrterkckvnntqsqnevahmlmhdvpkyl skrkarafsntemfaidl vmyt  
kerqlavdlaaerektrlarkhpmrspeetpehykfgmtakamlpdinivdvgn

>KP268301.1

mdtsgqtfvsvnl sdesntastavrtvsseadrleflrkmpfvidalvrktsyqgarfrakii  
gvcvdcgrkhdkglkterkckvnntqsqnevahmlmhdvpkyl nkrkarafsnaemfaidl vmyt  
keqlavnl aaerektrlarrhpmrspeetpehykfgmtakamlpdinavdvgn

>KP268302.1

mdtsgqtfvsvnl sdesntastavrtvsseadrleflrkmpfvidalvrktsyqgarfrakii  
gvcvdcgrkhdkglkterkckvnntqsqnevahmlmhdvpkyl nkrkarafsnaemfaidl vmyt  
kerqlavdlaaerektrlarkhpmrspeetpehykfgmtakamlpdinivdvgn

>KP268305.1

mdtsgqtfisvnl sdesntastevktsseaerleflrkmpfvidalirktsyqgarfrarii  
gvcvdcgrkhekgsrterkckvnntqsqnevahmlmhdvpkyl skrkarafsnaemfaidl vmyt  
kerqlavdlaaerektrlarkhpmrspeetpehykfgmtakamlpdinivdvgn

>KP268310.1

mdtsgqtfvsvnl sdesntastavrtvsseadrleflrkmpfvidalvrktsyqgarfrakii  
gvcvdcgrkhdkglkterkckvnntqsqnevahmlmhdvpkyl nkrkarafsnaemfaidl vmyt  
keqlavnl aaerektrlarrhpmrfpeetpehykfgmtakamlpdinavdvgn

>KP268313.1

mddtsgqtfisvnlsgdesntasteikavsseadrleflrkmpfiidalirknnyqgarfrvrii  
gvcvdcgrkhdkasrterkckvnntqsqnevahmlmhdvpvkylnrkarafsnaemfaidlvmt  
kerqlavdlaaerektrlarrhpmrspeetpehykfgmtakamlpdinavdvgn

>KP268315.1

mddtsgqtfisvnlsgdesntasteikavsseadrleflrkmpfiidalirknnyqgarfrarii  
gvcvdcgrkhdkasrterkckvnntqsqnevahmlmhdvpvkylnrkarafsnaemfaidlamht  
kerqlavdlaaerektrlarrhpmrspeetpehykfgmtakamlpdinavdvgn

>KP268318.1

mddtsgqtfisvnlsgdesntasteikavsseadrleflrkmpfiidalirknnyqgarfrarii  
gvcvdcgrkhdkasrterkckvnntqsqnevahmlmhdvpvkylnrkarafsnaemfaidlvmt  
kerqlavdlaaerektrlarrhpmrspeetpehykfgmtakamlpdinavdvgn

>KP268320.1

mddtsgqtfisvnlsgdesntasteieavsseadrleflrkmpfiidalirknnyqgarfrarii  
gvcvdcgrkhdkasrterkckvnntqsqnevahmlmhdvpvkylnrkarafsnaemfaidlvmt  
kerqlavdlaaerektrlarrhpmrspeetpehykfgmtakamlpdinavdvgn

>KP268323.1

mddtsgqtfisvnlsgdesntasteikavsseadrleflrkmpfiidalirknnyqgarfrarii  
gvcvdcgrkhdkasrterkckvnntqsqnevahmlmhdvpvkylnrkarafsnaemfaidlvmt  
kerqlavdlaaerektrlarrhpmrspeetpehykfgmtakamlpdinavdvgnrwr

>KP268335.1

mddtsgqtfvsvnlsgdesntastevktsleadrleflrkmpfiidalirkktyqgarfrarii  
gvcvdcgrkhdkasrterkckvnntqsqnevahmlmhnvpveylkkrkarafsnaemfaidlvmt  
kerqlavdlaaerertrlarrhpmrspeetpehykfgmtakamlpdinaidvgdn

>KP268336.1

mddtsgqtfvsvnlsgdesntastevktsleadrleflrkmpfiidalirkktyqgarfrarii  
gvcvdcgrkhdkasrterkckvnntqsqnevahmlmhnvpveylkkrkarafsnaemfaidlvmt  
kerqlavdlaaererarlarrhpmrspeetpehykfgmtakamlpdinaidvgdn

>KP268343.1

mddtsgqtfvsvnlsgdesntastevktsleadrleflrkmpfiidalirkktyqgarfrarii  
gvcvdcgrkhdkasrterkckvnntqsqnevahmlmhnvpveylkkrkarafsnaemfaidlvtht  
kerqlavdlaaerertrlarrhpmrspeetpehykfgmtakamlpdinaidvgdn

>KP268346.1

mddtsgqtfvsvslsgdesntastevktsleadrleflrkmpfiidalirkktyqgarfrarii  
gvcvdcgrkhdkasrterkckvnntqsqnevahmlmhnvpveylkkrkarafsnaemfaidlvmt  
kerqlavdlaaerertrlarrhpmrspeetpehykfgmtakamlpdinaidvgdn

>KP268349.1

mddtsgqtfvsvnlsgdesntastevktsleadrleflrkmpfiidalirkktyqgarfrarii  
gvcvdcgrkhdkasrterkckvnntqsqnevahmlmhnvpveylkkrkarafsnaemfaidlvmt  
kerqlavdlaaerertrlarrhpmrspeetpehykfgmtakamlpdtnaidvgdn

>KP268355.1

mddtsgqtfvsvnlsgdesntattdvkpsseadrldflqkmpfiidalirknsyqgarfrarii  
gvcvdcgrkhdkgkterkckvnntqsqnevahmlmhdvpvkylnrkarafsnaeifaidlvmyt  
kerqlaidlaaerektrlarrhpmrspeetpehykfgmtakamlpdinaidvgdn

>KP268357.1

mddtsgqtfvsvnlsgdesntattdvkpvsseadrldflqkmpfiidalirknsyqgarfrarii  
gvcvdcgrkhdkgkterkckvnntqsqnevahmlmhdvpvkylnrkarafsneifaidlvmyt  
kerqlaidsaaerektrlarrhpmrspeetpghykfgrtakamlpdvnadvvgdn

>KP268359.1

mddtsgqtfvsvnlsgdesntastevktivsleadrleflrkmpfiidalirkttyqgarfrarii  
gvcvdcgrkhdkasrterkckvnntqsqnevahmlmhdvpveylkkrkarafsnaemfaidlvmht  
kerqlavdsaaerertrlarrhpmrspeetpehykfgmtakamlpdinaidvgdn

>KP268361.1

mdnasgqtfvsvnlsgdesntattdvkpvsseadrldflqkmpfiidalirknsyqgarfrarii  
gvcvdcgrkhdkgkterkckvnntqsqnevahmlmhdvpvkylnrkarafsnaeifaidlvmyt  
kerqlaidlaaerektrlarrhpmrspeetpehykfgmtakamlpdvnadvvgdn

>KP268364.1

mddtsgqtfvsvnlsgdesntastevktivsleadrleflrkmpfiidalirkttyqgarfrarii  
gvcvdcgrkhdkasrterkckvnntqsqnevahmlmhdvpveylkkrkarafsnaemfaidlvmht  
kerqlavdlaaerertrlarrhpmrspeetpehykfgmtakamlpdinaidvgdn

>KP268368.1

idstsgqtfvsvnlsgdesntastavrtvsseadrleflrkmpfvidalvrktsyqgarfrakii  
gvcvdcgrkhdkgkterkckvnntqsqnevahmlmhdvpvkylnrkarafsnaemfaidlvmht  
kekqlavnlaaerektrlarrhpmrspeetpehykfgmtakamlpdinadvvgdn

>KP268371.1

mdntsgqtfisvnlsgdesntastevktivsleadrleflrkmpfiidalirktnyqgarfrarii  
gvcvdcgrkhdkgkterkckvnntqsqnevahmlmhdvpvkylskrkarafsnaemfaidlvmht  
kerqlavdlaaerektrlarkhpmrspeetpehykfgmtakamlpdvnvadvvgdn

>KP268372.1

mdstsgqtfvsvnlsgdesntastavrtvsseadrleflrkmpfvidalvrktsyqgarfrakii  
gvcvdcgrkhdkgkterkckvnntqsqnevahmlmhdvpvkylnrkarafsnaemfaidlvmht  
kekqlavdlaaerektrlarrhpmrspeetpehykfgmtakamlpdinadvvgdn

>KP268376.1

mddtsgqtfvsvnlsgdesntastevktivsleadrleflrkmpftinalirkttyqgarfrarii  
gvcvdcgrkhdkasrterkckvnntqsqnevahmlmhdvpvkylkerkarafsnaemfaidlvmht  
kerqlavdlaaererarlarrhpmrspeetpehykfgvtakamlpdinaidvgdn

>KP268377.1

mddtsgqtfvsvnlsgdesntastevktivsleadrleflrkmpftinaliwktttyqgarfrarii  
gvcvdcgrkhdkasrterkckvnntqsqnevahmlmhdvpvkylkerkarafsnaemfaidlvmht  
kerqlavdlsaererarlarrhpmrspeetpehykfgvtakamlpdinaidvgdn

>KP268383.1

mddtsgqtfisvnlsgdesntastevktivsseaerleflrkmpfvidalirktsyqgarfrarii  
gvcvdcgrkhekglrterkckvnntqsqnevahmlmrdpvkylskrkarafsnaemfaidlvmht  
kerqlavdlaaerektrlarkhpmrspeetpehykfgmtakamspdinivdvgdn

>KP268384.1

mddtsgqtfisvnlsgdesntastevktivsseaerleflrkmpfvidalirktsyqgarfrarii  
gvcvdcgrkhekglrterkckvnntqsqnevahmlmrdpvkylskrkarafsnaemfaidlvmht  
kerqlavdlaaerektrlarkhpmrspeetpehykfgmtakamspdinivdvgdd

>KP268385.1

mddtsgqtfisvnlsdesntastevktvsseaerleflrkmpfvidalirktsyqgarfrarii  
gvcvdcgrkhekglrterkckvnntqsqnevahmlmrdpvkylskrkarafsnaemfaidlvm  
kerqlavdlaaerektrlarkhpmrspeetpehykfgmtakamlpdinivdvgn

>KP268386.1

mddtsgqtfisvnlsdesntastevktvsseaerleflrkmpfvidalirktsyqgtrfrarii  
gvcvdcgrkhekglrterkckvnntqsqnevahmlmrdpvkylskrkarafsnaemfaidlvm  
kerqlavdlaaerektrlarkhpmrspeetpehykfgmtakamlpdinivdvgn

>KP268391.1

mddtsgqtlisvnlsdesntastevktvsseaerleflrkmpfvidalirktsyqgarfrarii  
gvcvdcgkhekglsrterkckvnntqsqnevahmlmhdvpveylskrkarafsnaemfaidlvm  
kerqlavdlaaerektrlarkhpmrspeetpehykfgmtakamlpdinivdvgnedsseypvs  
lrvsggvlrehhfil

>KP268393.1

mndtsgqtfisvnlsdesntastevktvsseadrleflrkmpfiidalirktsyqgarfrarii  
gvcvdcgrkhdkgsrterkckvnntqsqnevahmlmhdvpkylskrkarafsnaemfaidlvm  
kerqlavdlaaerektrlarkhpmrspeetpehykfgmtakamlpdvnvvdvgn

>KP268396.1

Mddtsgqtfisvnlsdesntastevktvsseadrleflrkmpfvidalirktsyqgarfrarii  
gvcvdcgrkhekglsrterkckvnntqsqnevahmlmhdvpkylskrkarafsnaemlaidlvm  
kerqlavdlaaerektrlarkhpmrspeetpehykfgmtakamlpdvnvvdvgn

#### Supplemental Data 4-2 : classification of p23 amino acid sequences

##### >Cluster 0

|    |                                 |
|----|---------------------------------|
| 0  | 174aa, >DQ831487.1... at 93.68% |
| 1  | 209aa, >U42017.1... at 93.78%   |
| 2  | 209aa, >U42018.1... at 96.65%   |
| 3  | 209aa, >U42022.1... at 93.30%   |
| 4  | 209aa, >U42023.1... at 93.78%   |
| 5  | 185aa, >EU262685.1... at 94.05% |
| 6  | 204aa, >EU483657.1... at 94.61% |
| 7  | 204aa, >EU487601.1... at 93.63% |
| 8  | 209aa, >FJ860145.1... at 93.30% |
| 9  | 209aa, >GQ475044.1... at 95.22% |
| 10 | 209aa, >GQ475045.1... at 93.78% |
| 11 | 209aa, >GQ475046.1... at 93.78% |
| 12 | 209aa, >GQ475047.1... at 93.78% |
| 13 | 209aa, >GQ475048.1... at 94.26% |
| 14 | 196aa, >GQ338647.1... at 94.90% |
| 15 | 196aa, >GQ338650.1... at 93.37% |
| 16 | 196aa, >GQ338652.1... at 97.45% |
| 17 | 196aa, >GQ338653.1... at 94.39% |
| 18 | 196aa, >GQ338654.1... at 93.37% |
| 19 | 196aa, >GQ338658.1... at 96.94% |
| 20 | 210aa, >HQ329231.1... at 97.14% |
| 21 | 210aa, >HQ329232.1... at 98.10% |
| 22 | 210aa, >HQ329233.1... at 98.10% |
| 23 | 210aa, >HQ329234.1... at 94.29% |
| 24 | 210aa, >HQ329235.1... at 93.33% |
| 25 | 210aa, >HQ329236.1... at 94.29% |
| 26 | 210aa, >HQ329237.1... at 97.62% |
| 27 | 210aa, >HQ329239.1... at 95.71% |
| 28 | 210aa, >HQ329240.1... at 93.81% |
| 29 | 210aa, >HQ329241.1... at 93.33% |
| 30 | 210aa, >HQ329242.1... at 94.29% |
| 31 | 210aa, >HQ329243.1... at 97.14% |
| 32 | 210aa, >HQ329244.1... at 97.62% |
| 33 | 210aa, >HQ329245.1... at 94.29% |
| 34 | 210aa, >HQ329246.1... at 93.33% |
| 35 | 209aa, >AJ579773.1... at 93.30% |
| 36 | 209aa, >AJ579776.1... at 95.22% |
| 37 | 209aa, >AJ579777.1... at 94.74% |
| 38 | 210aa, >JN384022.1... at 93.81% |
| 39 | 205aa, >JQ819955.1... at 93.17% |
| 40 | 205aa, >JQ819960.1... at 93.17% |
| 41 | 205aa, >JQ820001.1... at 93.17% |



42 204aa, >JQ820013.1... at 93.63%  
43 213aa, >KC202908.1... \*  
44 209aa, >KC562142.1... at 93.30%  
45 209aa, >KC577594.1... at 93.30%  
46 209aa, >KF724146.1... at 97.61%  
47 209aa, >KC774010.1... at 93.78%  
48 209aa, >KC774012.1... at 93.78%  
49 209aa, >KC774014.1... at 94.26%  
50 209aa, >KC774015.1... at 94.26%  
51 209aa, >KF913716.1... at 93.78%  
52 210aa, >AY750732.1... at 93.33%  
53 210aa, >AY750735.1... at 93.81%  
54 210aa, >AY750740.1... at 96.67%  
55 210aa, >AY750742.1... at 93.33%  
56 210aa, >AY750745.1... at 97.14%  
57 210aa, >AY750746.1... at 94.29%  
58 210aa, >AY962348.1... at 95.24%  
59 210aa, >AY962350.1... at 95.71%  
60 210aa, >AY962356.1... at 95.71%  
61 210aa, >AY962363.1... at 94.29%  
62 210aa, >AY962368.1... at 95.71%  
63 210aa, >AY962369.1... at 94.29%  
64 210aa, >AY962370.1... at 94.29%  
65 210aa, >AY962374.1... at 94.29%  
66 210aa, >AY962377.1... at 94.29%  
67 210aa, >AY962378.1... at 93.81%  
68 210aa, >AY962383.1... at 93.33%  
69 210aa, >AY962385.1... at 93.81%  
70 209aa, >KP284581.1... at 97.61%  
71 185aa, >KP268298.1... at 95.14%  
72 185aa, >KP268300.1... at 96.22%  
73 185aa, >KP268302.1... at 94.05%  
74 185aa, >KP268305.1... at 97.30%  
75 185aa, >KP268318.1... at 93.51%  
76 185aa, >KP268371.1... at 95.68%  
77 185aa, >KP268383.1... at 95.68%  
78 185aa, >KP268384.1... at 95.14%  
79 185aa, >KP268385.1... at 96.22%  
80 185aa, >KP268386.1... at 95.68%  
81 210aa, >KP268391.1... at 94.76%  
82 185aa, >KP268393.1... at 97.30%  
83 185aa, >KP268396.1... at 97.30%  
>Cluster 1  
0 209aa, >U42006.1... at 94.74%

1 185aa, >EU262688.1... at 93.51%  
2 210aa, >FJ860136.1... \*  
3 209aa, >FJ860138.1... at 99.52%  
4 209aa, >FJ860140.1... at 99.04%  
5 209aa, >AJ579774.1... at 94.26%  
6 205aa, >JQ819944.1... at 97.56%  
7 205aa, >JQ819963.1... at 98.54%  
8 205aa, >JQ819964.1... at 98.05%  
9 205aa, >JQ819965.1... at 98.54%  
10 205aa, >JQ819967.1... at 98.05%  
11 205aa, >JQ819968.1... at 98.05%  
12 205aa, >JQ819969.1... at 99.02%  
13 205aa, >JQ819971.1... at 99.02%  
14 205aa, >JQ819973.1... at 98.54%  
15 205aa, >JQ819974.1... at 98.54%  
16 205aa, >JQ819976.1... at 99.02%  
17 205aa, >JQ819979.1... at 98.54%  
18 205aa, >JQ819981.1... at 98.54%  
19 205aa, >JQ819983.1... at 98.05%  
20 205aa, >JQ819987.1... at 98.54%  
21 205aa, >JQ819988.1... at 99.02%  
22 205aa, >JQ819991.1... at 98.05%  
23 205aa, >JQ819996.1... at 98.54%  
24 205aa, >JQ819997.1... at 99.02%  
25 205aa, >JQ820000.1... at 98.54%  
26 205aa, >JQ820003.1... at 98.54%  
27 205aa, >JQ820007.1... at 99.02%  
28 205aa, >JQ820008.1... at 99.02%  
29 205aa, >JQ820010.1... at 96.59%  
30 209aa, >KC562143.1... at 95.22%  
31 209aa, >KC562144.1... at 95.69%  
32 209aa, >KF913717.1... at 94.74%  
33 209aa, >KF913718.1... at 95.69%  
34 210aa, >AY750733.1... at 94.29%  
35 210aa, >AY750738.1... at 94.76%  
36 210aa, >AY750741.1... at 95.24%  
37 210aa, >AY750744.1... at 93.81%  
38 210aa, >AY750750.1... at 94.76%  
39 185aa, >KP268290.1... at 94.59%  
40 185aa, >KP268297.1... at 94.05%  
41 185aa, >KP268313.1... at 95.14%  
42 185aa, >KP268315.1... at 95.14%  
43 185aa, >KP268320.1... at 95.14%  
44 188aa, >KP268323.1... at 94.15%

45 185aa, >KP268335.1... at 95.14%  
46 185aa, >KP268336.1... at 94.59%  
47 185aa, >KP268343.1... at 94.59%  
48 185aa, >KP268346.1... at 94.59%  
49 185aa, >KP268349.1... at 94.59%  
50 185aa, >KP268359.1... at 95.14%  
51 185aa, >KP268364.1... at 95.68%  
52 185aa, >KP268376.1... at 94.05%  
>Cluster 2  
0 210aa, >HQ329238.1... \*  
1 210aa, >AY750739.1... at 93.81%  
2 196aa, >DQ443746.1... at 93.37%  
>Cluster 3  
0 196aa, >AJ297704.1... at 93.88%  
1 174aa, >DQ831493.1... at 94.25%  
2 174aa, >DQ831496.1... at 95.40%  
3 209aa, >AJ298843.1... at 94.26%  
4 209aa, >U42019.1... at 98.09%  
5 209aa, >U42020.1... at 96.65%  
6 209aa, >U42021.1... at 98.56%  
7 209aa, >U42024.1... at 98.09%  
8 204aa, >EU487603.1... at 99.51%  
9 209aa, >FJ860143.1... at 97.13%  
10 209aa, >FJ860144.1... at 97.13%  
11 209aa, >FJ860146.1... at 98.09%  
12 196aa, >GQ338645.1... at 95.92%  
13 196aa, >GQ338646.1... at 94.39%  
14 196aa, >GQ338648.1... at 96.94%  
15 196aa, >GQ338651.1... at 94.90%  
16 196aa, >GQ338656.1... at 93.37%  
17 196aa, >GQ338659.1... at 95.41%  
18 209aa, >AJ579762.1... at 98.56%  
19 209aa, >AJ579764.1... at 99.52%  
20 209aa, >AJ579766.1... at 99.04%  
21 209aa, >AJ579768.1... at 94.26%  
22 210aa, >JN384024.1... \*  
23 209aa, >JQ039913.1... at 96.17%  
24 205aa, >JQ819945.1... at 93.66%  
25 205aa, >JQ819946.1... at 93.17%  
26 205aa, >JQ819954.1... at 94.15%  
27 209aa, >AY652902.1... at 94.26%  
28 209aa, >AY652906.1... at 98.56%  
29 209aa, >KF724132.1... at 99.52%  
30 209aa, >KF724135.1... at 99.52%

31 209aa, >KF724136.1... at 99.04%  
 32 209aa, >KF724137.1... at 99.04%  
 33 209aa, >KF724141.1... at 99.04%  
 34 209aa, >KC774011.1... at 98.56%  
 35 209aa, >KC774013.1... at 99.04%  
 36 209aa, >KC774017.1... at 100.00%  
 37 210aa, >AY750736.1... at 93.81%  
 38 210aa, >AY750747.1... at 93.33%  
 39 210aa, >AY962349.1... at 94.76%  
 40 210aa, >AY962357.1... at 93.33%  
 41 210aa, >AY962358.1... at 94.29%  
 42 210aa, >AY962362.1... at 94.29%  
 43 210aa, >AY962373.1... at 93.33%  
 44 210aa, >AY962375.1... at 93.81%  
 45 210aa, >AY962376.1... at 93.81%  
 46 210aa, >AY962380.1... at 94.29%  
 47 209aa, >KP284579.1... at 99.52%  
 48 196aa, >DQ443745.1... at 96.94%  
 >Cluster 4  
 0 174aa, >DQ831488.1... at 98.85%  
 1 185aa, >EU262682.1... at 99.46%  
 2 185aa, >EU262683.1... at 98.92%  
 3 185aa, >EU262686.1... at 96.76%  
 4 185aa, >EU262689.1... at 98.92%  
 5 209aa, >FJ860142.1... at 97.61%  
 6 209aa, >GQ475049.1... at 98.56%  
 7 209aa, >GQ475051.1... at 98.09%  
 8 209aa, >GQ475052.1... at 99.04%  
 9 196aa, >GQ338657.1... at 98.98%  
 10 209aa, >AJ579770.1... at 96.65%  
 11 209aa, >AJ579771.1... at 99.52%  
 12 210aa, >KC202886.1... \*  
 13 209aa, >AY652901.1... at 95.69%  
 14 210aa, >AY750737.1... at 98.57%  
 15 210aa, >AY750743.1... at 96.19%  
 16 210aa, >AY750748.1... at 96.67%  
 17 210aa, >AY750749.1... at 99.05%  
 18 210aa, >AY750751.1... at 99.52%  
 19 210aa, >AY962351.1... at 98.10%  
 20 210aa, >AY962359.1... at 99.05%  
 21 210aa, >AY962361.1... at 98.57%  
 22 196aa, >DQ443747.1... at 98.98%  
 23 196aa, >DQ443748.1... at 98.47%  
 24 196aa, >DQ443749.1... at 98.47%

25 196aa, >DQ443750.1... at 98.98%  
26 196aa, >DQ443751.1... at 99.49%  
27 185aa, >KP268301.1... at 96.22%  
28 185aa, >KP268310.1... at 95.68%  
29 185aa, >KP268368.1... at 95.68%  
30 185aa, >KP268372.1... at 95.68%  
>Cluster 5  
0 210aa, >AY962355.1... \*  
>Cluster 6  
0 205aa, >JQ819943.1... at 95.12%  
1 205aa, >JQ819947.1... at 95.12%  
2 205aa, >JQ819948.1... at 94.15%  
3 210aa, >AY962360.1... \*  
4 210aa, >AY962365.1... at 96.19%  
5 210aa, >AY962382.1... at 97.62%  
6 210aa, >AY962386.1... at 97.62%  
7 210aa, >AY962388.1... at 96.67%  
>Cluster 7  
0 209aa, >AJ579767.1... \*  
>Cluster 8  
0 209aa, >AJ579769.1... \*  
>Cluster 9  
0 209aa, >AJ579772.1... \*  
1 209aa, >KC774016.1... at 97.61%  
2 185aa, >KP268355.1... at 97.84%  
3 185aa, >KP268357.1... at 96.76%  
4 185aa, >KP268361.1... at 98.38%  
>Cluster 10  
0 209aa, >KC562141.1... \*  
1 209aa, >KC562145.1... at 99.04%  
2 209aa, >KC562146.1... at 97.13%  
3 209aa, >KF913715.1... at 96.65%  
4 209aa, >KJ094313.1... at 96.65%  
>Cluster 11  
0 209aa, >AY652904.1... \*  
>Cluster 12  
0 209aa, >KP284580.1... \*  
>Cluster 13  
0 206aa, >KC202889.1... \*  
>Cluster 14  
0 205aa, >JQ819952.1... \*  
>Cluster 15  
0 200aa, >KC202888.1... \*  
>Cluster 16

0 196aa, >DQ443744.1... \*

>Cluster 17

0 185aa, >KP268377.1... \*

>Cluster 18

0 174aa, >DQ831495.1... \*

>Cluster 19

0 170aa, >KC202887.1... \*

Supplemental Data 4-3 : The phylogenetic tree of p23 sequences

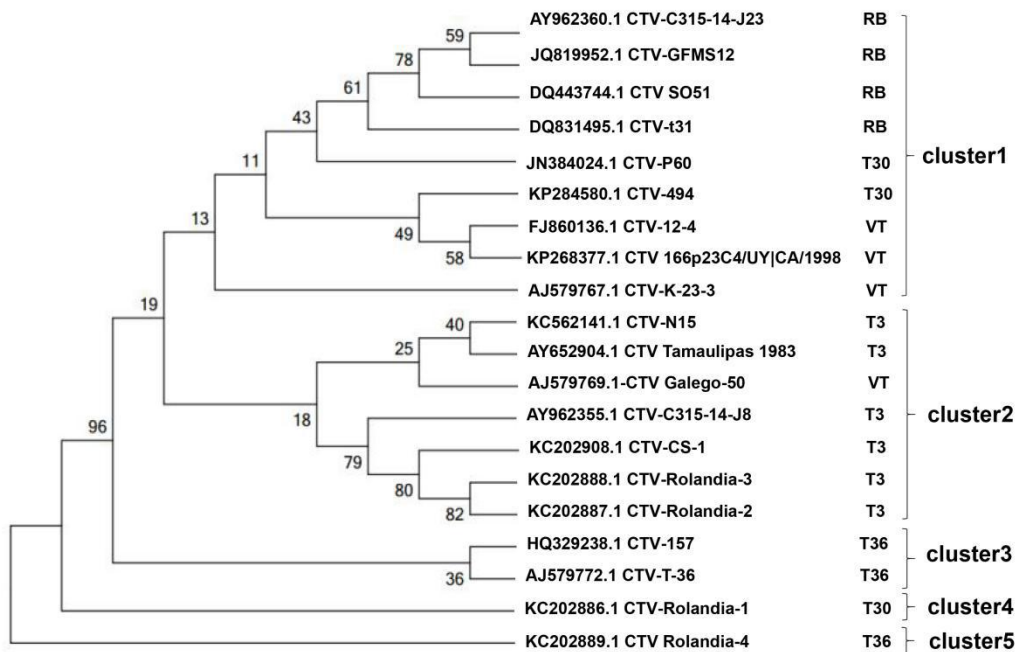

# Supplemental Data 4-4 : p23 amino acid sequence alignment

|  |  |  |  |  |  |  |  |  |  |  |  |  |  |  | Section 1 |  |  |  |  |  |  |  |  |  |
|--|--|--|--|--|--|--|--|--|--|--|--|--|--|--|-----------|--|--|--|--|--|--|--|--|--|
|  |  |  |  |  |  |  |  |  |  |  |  |  |  |  |           |  |  |  |  |  |  |  |  |  |
|  |  |  |  |  |  |  |  |  |  |  |  |  |  |  |           |  |  |  |  |  |  |  |  |  |
|  |  |  |  |  |  |  |  |  |  |  |  |  |  |  |           |  |  |  |  |  |  |  |  |  |
|  |  |  |  |  |  |  |  |  |  |  |  |  |  |  |           |  |  |  |  |  |  |  |  |  |
|  |  |  |  |  |  |  |  |  |  |  |  |  |  |  |           |  |  |  |  |  |  |  |  |  |
|  |  |  |  |  |  |  |  |  |  |  |  |  |  |  |           |  |  |  |  |  |  |  |  |  |
|  |  |  |  |  |  |  |  |  |  |  |  |  |  |  |           |  |  |  |  |  |  |  |  |  |
|  |  |  |  |  |  |  |  |  |  |  |  |  |  |  |           |  |  |  |  |  |  |  |  |  |
|  |  |  |  |  |  |  |  |  |  |  |  |  |  |  |           |  |  |  |  |  |  |  |  |  |
|  |  |  |  |  |  |  |  |  |  |  |  |  |  |  |           |  |  |  |  |  |  |  |  |  |
|  |  |  |  |  |  |  |  |  |  |  |  |  |  |  |           |  |  |  |  |  |  |  |  |  |
|  |  |  |  |  |  |  |  |  |  |  |  |  |  |  |           |  |  |  |  |  |  |  |  |  |
|  |  |  |  |  |  |  |  |  |  |  |  |  |  |  |           |  |  |  |  |  |  |  |  |  |
|  |  |  |  |  |  |  |  |  |  |  |  |  |  |  |           |  |  |  |  |  |  |  |  |  |
|  |  |  |  |  |  |  |  |  |  |  |  |  |  |  |           |  |  |  |  |  |  |  |  |  |
|  |  |  |  |  |  |  |  |  |  |  |  |  |  |  |           |  |  |  |  |  |  |  |  |  |
|  |  |  |  |  |  |  |  |  |  |  |  |  |  |  |           |  |  |  |  |  |  |  |  |  |
|  |  |  |  |  |  |  |  |  |  |  |  |  |  |  |           |  |  |  |  |  |  |  |  |  |
|  |  |  |  |  |  |  |  |  |  |  |  |  |  |  |           |  |  |  |  |  |  |  |  |  |
|  |  |  |  |  |  |  |  |  |  |  |  |  |  |  |           |  |  |  |  |  |  |  |  |  |
|  |  |  |  |  |  |  |  |  |  |  |  |  |  |  |           |  |  |  |  |  |  |  |  |  |
|  |  |  |  |  |  |  |  |  |  |  |  |  |  |  |           |  |  |  |  |  |  |  |  |  |
|  |  |  |  |  |  |  |  |  |  |  |  |  |  |  |           |  |  |  |  |  |  |  |  |  |
|  |  |  |  |  |  |  |  |  |  |  |  |  |  |  |           |  |  |  |  |  |  |  |  |  |
|  |  |  |  |  |  |  |  |  |  |  |  |  |  |  |           |  |  |  |  |  |  |  |  |  |
|  |  |  |  |  |  |  |  |  |  |  |  |  |  |  |           |  |  |  |  |  |  |  |  |  |
|  |  |  |  |  |  |  |  |  |  |  |  |  |  |  |           |  |  |  |  |  |  |  |  |  |
|  |  |  |  |  |  |  |  |  |  |  |  |  |  |  |           |  |  |  |  |  |  |  |  |  |
|  |  |  |  |  |  |  |  |  |  |  |  |  |  |  |           |  |  |  |  |  |  |  |  |  |
|  |  |  |  |  |  |  |  |  |  |  |  |  |  |  |           |  |  |  |  |  |  |  |  |  |
|  |  |  |  |  |  |  |  |  |  |  |  |  |  |  |           |  |  |  |  |  |  |  |  |  |
|  |  |  |  |  |  |  |  |  |  |  |  |  |  |  |           |  |  |  |  |  |  |  |  |  |
|  |  |  |  |  |  |  |  |  |  |  |  |  |  |  |           |  |  |  |  |  |  |  |  |  |
|  |  |  |  |  |  |  |  |  |  |  |  |  |  |  |           |  |  |  |  |  |  |  |  |  |
|  |  |  |  |  |  |  |  |  |  |  |  |  |  |  |           |  |  |  |  |  |  |  |  |  |
|  |  |  |  |  |  |  |  |  |  |  |  |  |  |  |           |  |  |  |  |  |  |  |  |  |
|  |  |  |  |  |  |  |  |  |  |  |  |  |  |  |           |  |  |  |  |  |  |  |  |  |
|  |  |  |  |  |  |  |  |  |  |  |  |  |  |  |           |  |  |  |  |  |  |  |  |  |
|  |  |  |  |  |  |  |  |  |  |  |  |  |  |  |           |  |  |  |  |  |  |  |  |  |
|  |  |  |  |  |  |  |  |  |  |  |  |  |  |  |           |  |  |  |  |  |  |  |  |  |
|  |  |  |  |  |  |  |  |  |  |  |  |  |  |  |           |  |  |  |  |  |  |  |  |  |
|  |  |  |  |  |  |  |  |  |  |  |  |  |  |  |           |  |  |  |  |  |  |  |  |  |
|  |  |  |  |  |  |  |  |  |  |  |  |  |  |  |           |  |  |  |  |  |  |  |  |  |
|  |  |  |  |  |  |  |  |  |  |  |  |  |  |  |           |  |  |  |  |  |  |  |  |  |
|  |  |  |  |  |  |  |  |  |  |  |  |  |  |  |           |  |  |  |  |  |  |  |  |  |
|  |  |  |  |  |  |  |  |  |  |  |  |  |  |  |           |  |  |  |  |  |  |  |  |  |
|  |  |  |  |  |  |  |  |  |  |  |  |  |  |  |           |  |  |  |  |  |  |  |  |  |
|  |  |  |  |  |  |  |  |  |  |  |  |  |  |  |           |  |  |  |  |  |  |  |  |  |
|  |  |  |  |  |  |  |  |  |  |  |  |  |  |  |           |  |  |  |  |  |  |  |  |  |
|  |  |  |  |  |  |  |  |  |  |  |  |  |  |  |           |  |  |  |  |  |  |  |  |  |
|  |  |  |  |  |  |  |  |  |  |  |  |  |  |  |           |  |  |  |  |  |  |  |  |  |
|  |  |  |  |  |  |  |  |  |  |  |  |  |  |  |           |  |  |  |  |  |  |  |  |  |
|  |  |  |  |  |  |  |  |  |  |  |  |  |  |  |           |  |  |  |  |  |  |  |  |  |
|  |  |  |  |  |  |  |  |  |  |  |  |  |  |  |           |  |  |  |  |  |  |  |  |  |
|  |  |  |  |  |  |  |  |  |  |  |  |  |  |  |           |  |  |  |  |  |  |  |  |  |
|  |  |  |  |  |  |  |  |  |  |  |  |  |  |  |           |  |  |  |  |  |  |  |  |  |
|  |  |  |  |  |  |  |  |  |  |  |  |  |  |  |           |  |  |  |  |  |  |  |  |  |
|  |  |  |  |  |  |  |  |  |  |  |  |  |  |  |           |  |  |  |  |  |  |  |  |  |
|  |  |  |  |  |  |  |  |  |  |  |  |  |  |  |           |  |  |  |  |  |  |  |  |  |
|  |  |  |  |  |  |  |  |  |  |  |  |  |  |  |           |  |  |  |  |  |  |  |  |  |
|  |  |  |  |  |  |  |  |  |  |  |  |  |  |  |           |  |  |  |  |  |  |  |  |  |
|  |  |  |  |  |  |  |  |  |  |  |  |  |  |  |           |  |  |  |  |  |  |  |  |  |
|  |  |  |  |  |  |  |  |  |  |  |  |  |  |  |           |  |  |  |  |  |  |  |  |  |
|  |  |  |  |  |  |  |  |  |  |  |  |  |  |  |           |  |  |  |  |  |  |  |  |  |
|  |  |  |  |  |  |  |  |  |  |  |  |  |  |  |           |  |  |  |  |  |  |  |  |  |
|  |  |  |  |  |  |  |  |  |  |  |  |  |  |  |           |  |  |  |  |  |  |  |  |  |
|  |  |  |  |  |  |  |  |  |  |  |  |  |  |  |           |  |  |  |  |  |  |  |  |  |
|  |  |  |  |  |  |  |  |  |  |  |  |  |  |  |           |  |  |  |  |  |  |  |  |  |
|  |  |  |  |  |  |  |  |  |  |  |  |  |  |  |           |  |  |  |  |  |  |  |  |  |
|  |  |  |  |  |  |  |  |  |  |  |  |  |  |  |           |  |  |  |  |  |  |  |  |  |
|  |  |  |  |  |  |  |  |  |  |  |  |  |  |  |           |  |  |  |  |  |  |  |  |  |
|  |  |  |  |  |  |  |  |  |  |  |  |  |  |  |           |  |  |  |  |  |  |  |  |  |
|  |  |  |  |  |  |  |  |  |  |  |  |  |  |  |           |  |  |  |  |  |  |  |  |  |
|  |  |  |  |  |  |  |  |  |  |  |  |  |  |  |           |  |  |  |  |  |  |  |  |  |
|  |  |  |  |  |  |  |  |  |  |  |  |  |  |  |           |  |  |  |  |  |  |  |  |  |
|  |  |  |  |  |  |  |  |  |  |  |  |  |  |  |           |  |  |  |  |  |  |  |  |  |
|  |  |  |  |  |  |  |  |  |  |  |  |  |  |  |           |  |  |  |  |  |  |  |  |  |
|  |  |  |  |  |  |  |  |  |  |  |  |  |  |  |           |  |  |  |  |  |  |  |  |  |
|  |  |  |  |  |  |  |  |  |  |  |  |  |  |  |           |  |  |  |  |  |  |  |  |  |
|  |  |  |  |  |  |  |  |  |  |  |  |  |  |  |           |  |  |  |  |  |  |  |  |  |
|  |  |  |  |  |  |  |  |  |  |  |  |  |  |  |           |  |  |  |  |  |  |  |  |  |
|  |  |  |  |  |  |  |  |  |  |  |  |  |  |  |           |  |  |  |  |  |  |  |  |  |
|  |  |  |  |  |  |  |  |  |  |  |  |  |  |  |           |  |  |  |  |  |  |  |  |  |
|  |  |  |  |  |  |  |  |  |  |  |  |  |  |  |           |  |  |  |  |  |  |  |  |  |
|  |  |  |  |  |  |  |  |  |  |  |  |  |  |  |           |  |  |  |  |  |  |  |  |  |
|  |  |  |  |  |  |  |  |  |  |  |  |  |  |  |           |  |  |  |  |  |  |  |  |  |
|  |  |  |  |  |  |  |  |  |  |  |  |  |  |  |           |  |  |  |  |  |  |  |  |  |
|  |  |  |  |  |  |  |  |  |  |  |  |  |  |  |           |  |  |  |  |  |  |  |  |  |
|  |  |  |  |  |  |  |  |  |  |  |  |  |  |  |           |  |  |  |  |  |  |  |  |  |
|  |  |  |  |  |  |  |  |  |  |  |  |  |  |  |           |  |  |  |  |  |  |  |  |  |
|  |  |  |  |  |  |  |  |  |  |  |  |  |  |  |           |  |  |  |  |  |  |  |  |  |
|  |  |  |  |  |  |  |  |  |  |  |  |  |  |  |           |  |  |  |  |  |  |  |  |  |
|  |  |  |  |  |  |  |  |  |  |  |  |  |  |  |           |  |  |  |  |  |  |  |  |  |
|  |  |  |  |  |  |  |  |  |  |  |  |  |  |  |           |  |  |  |  |  |  |  |  |  |
|  |  |  |  |  |  |  |  |  |  |  |  |  |  |  |           |  |  |  |  |  |  |  |  |  |
|  |  |  |  |  |  |  |  |  |  |  |  |  |  |  |           |  |  |  |  |  |  |  |  |  |
|  |  |  |  |  |  |  |  |  |  |  |  |  |  |  |           |  |  |  |  |  |  |  |  |  |
|  |  |  |  |  |  |  |  |  |  |  |  |  |  |  |           |  |  |  |  |  |  |  |  |  |
|  |  |  |  |  |  |  |  |  |  |  |  |  |  |  |           |  |  |  |  |  |  |  |  |  |
|  |  |  |  |  |  |  |  |  |  |  |  |  |  |  |           |  |  |  |  |  |  |  |  |  |
|  |  |  |  |  |  |  |  |  |  |  |  |  |  |  |           |  |  |  |  |  |  |  |  |  |
|  |  |  |  |  |  |  |  |  |  |  |  |  |  |  |           |  |  |  |  |  |  |  |  |  |
|  |  |  |  |  |  |  |  |  |  |  |  |  |  |  |           |  |  |  |  |  |  |  |  |  |
|  |  |  |  |  |  |  |  |  |  |  |  |  |  |  |           |  |  |  |  |  |  |  |  |  |
|  |  |  |  |  |  |  |  |  |  |  |  |  |  |  |           |  |  |  |  |  |  |  |  |  |
|  |  |  |  |  |  |  |  |  |  |  |  |  |  |  |           |  |  |  |  |  |  |  |  |  |
|  |  |  |  |  |  |  |  |  |  |  |  |  |  |  |           |  |  |  |  |  |  |  |  |  |
|  |  |  |  |  |  |  |  |  |  |  |  |  |  |  |           |  |  |  |  |  |  |  |  |  |
|  |  |  |  |  |  |  |  |  |  |  |  |  |  |  |           |  |  |  |  |  |  |  |  |  |
|  |  |  |  |  |  |  |  |  |  |  |  |  |  |  |           |  |  |  |  |  |  |  |  |  |
|  |  |  |  |  |  |  |  |  |  |  |  |  |  |  |           |  |  |  |  |  |  |  |  |  |
|  |  |  |  |  |  |  |  |  |  |  |  |  |  |  |           |  |  |  |  |  |  |  |  |  |
|  |  |  |  |  |  |  |  |  |  |  |  |  |  |  |           |  |  |  |  |  |  |  |  |  |
|  |  |  |  |  |  |  |  |  |  |  |  |  |  |  |           |  |  |  |  |  |  |  |  |  |
|  |  |  |  |  |  |  |  |  |  |  |  |  |  |  |           |  |  |  |  |  |  |  |  |  |
|  |  |  |  |  |  |  |  |  |  |  |  |  |  |  |           |  |  |  |  |  |  |  |  |  |
|  |  |  |  |  |  |  |  |  |  |  |  |  |  |  |           |  |  |  |  |  |  |  |  |  |
|  |  |  |  |  |  |  |  |  |  |  |  |  |  |  |           |  |  |  |  |  |  |  |  |  |
|  |  |  |  |  |  |  |  |  |  |  |  |  |  |  |           |  |  |  |  |  |  |  |  |  |
|  |  |  |  |  |  |  |  |  |  |  |  |  |  |  |           |  |  |  |  |  |  |  |  |  |
|  |  |  |  |  |  |  |  |  |  |  |  |  |  |  |           |  |  |  |  |  |  |  |  |  |
|  |  |  |  |  |  |  |  |  |  |  |  |  |  |  |           |  |  |  |  |  |  |  |  |  |
|  |  |  |  |  |  |  |  |  |  |  |  |  |  |  |           |  |  |  |  |  |  |  |  |  |
|  |  |  |  |  |  |  |  |  |  |  |  |  |  |  |           |  |  |  |  |  |  |  |  |  |
|  |  |  |  |  |  |  |  |  |  |  |  |  |  |  |           |  |  |  |  |  |  |  |  |  |
|  |  |  |  |  |  |  |  |  |  |  |  |  |  |  |           |  |  |  |  |  |  |  |  |  |
|  |  |  |  |  |  |  |  |  |  |  |  |  |  |  |           |  |  |  |  |  |  |  |  |  |
|  |  |  |  |  |  |  |  |  |  |  |  |  |  |  |           |  |  |  |  |  |  |  |  |  |
|  |  |  |  |  |  |  |  |  |  |  |  |  |  |  |           |  |  |  |  |  |  |  |  |  |
|  |  |  |  |  |  |  |  |  |  |  |  |  |  |  |           |  |  |  |  |  |  |  |  |  |
|  |  |  |  |  |  |  |  |  |  |  |  |  |  |  |           |  |  |  |  |  |  |  |  |  |
|  |  |  |  |  |  |  |  |  |  |  |  |  |  |  |           |  |  |  |  |  |  |  |  |  |
|  |  |  |  |  |  |  |  |  |  |  |  |  |  |  |           |  |  |  |  |  |  |  |  |  |
|  |  |  |  |  |  |  |  |  |  |  |  |  |  |  |           |  |  |  |  |  |  |  |  |  |
|  |  |  |  |  |  |  |  |  |  |  |  |  |  |  |           |  |  |  |  |  |  |  |  |  |
|  |  |  |  |  |  |  |  |  |  |  |  |  |  |  |           |  |  |  |  |  |  |  |  |  |
|  |  |  |  |  |  |  |  |  |  |  |  |  |  |  |           |  |  |  |  |  |  |  |  |  |
|  |  |  |  |  |  |  |  |  |  |  |  |  |  |  |           |  |  |  |  |  |  |  |  |  |
|  |  |  |  |  |  |  |  |  |  |  |  |  |  |  |           |  |  |  |  |  |  |  |  |  |
|  |  |  |  |  |  |  |  |  |  |  |  |  |  |  |           |  |  |  |  |  |  |  |  |  |
|  |  |  |  |  |  |  |  |  |  |  |  |  |  |  |           |  |  |  |  |  |  |  |  |  |
|  |  |  |  |  |  |  |  |  |  |  |  |  |  |  |           |  |  |  |  |  |  |  |  |  |
|  |  |  |  |  |  |  |  |  |  |  |  |  |  |  |           |  |  |  |  |  |  |  |  |  |
|  |  |  |  |  |  |  |  |  |  |  |  |  |  |  |           |  |  |  |  |  |  |  |  |  |
|  |  |  |  |  |  |  |  |  |  |  |  |  |  |  |           |  |  |  |  |  |  |  |  |  |
|  |  |  |  |  |  |  |  |  |  |  |  |  |  |  |           |  |  |  |  |  |  |  |  |  |
|  |  |  |  |  |  |  |  |  |  |  |  |  |  |  |           |  |  |  |  |  |  |  |  |  |
|  |  |  |  |  |  |  |  |  |  |  |  |  |  |  |           |  |  |  |  |  |  |  |  |  |
|  |  |  |  |  |  |  |  |  |  |  |  |  |  |  |           |  |  |  |  |  |  |  |  |  |
|  |  |  |  |  |  |  |  |  |  |  |  |  |  |  |           |  |  |  |  |  |  |  |  |  |
|  |  |  |  |  |  |  |  |  |  |  |  |  |  |  |           |  |  |  |  |  |  |  |  |  |
|  |  |  |  |  |  |  |  |  |  |  |  |  |  |  |           |  |  |  |  |  |  |  |  |  |
|  |  |  |  |  |  |  |  |  |  |  |  |  |  |  |           |  |  |  |  |  |  |  |  |  |
|  |  |  |  |  |  |  |  |  |  |  |  |  |  |  |           |  |  |  |  |  |  |  |  |  |
|  |  |  |  |  |  |  |  |  |  |  |  |  |  |  |           |  |  |  |  |  |  |  |  |  |
|  |  |  |  |  |  |  |  |  |  |  |  |  |  |  |           |  |  |  |  |  |  |  |  |  |
|  |  |  |  |  |  |  |  |  |  |  |  |  |  |  |           |  |  |  |  |  |  |  |  |  |
|  |  |  |  |  |  |  |  |  |  |  |  |  |  |  |           |  |  |  |  |  |  |  |  |  |
|  |  |  |  |  |  |  |  |  |  |  |  |  |  |  |           |  |  |  |  |  |  |  |  |  |
|  |  |  |  |  |  |  |  |  |  |  |  |  |  |  |           |  |  |  |  |  |  |  |  |  |
|  |  |  |  |  |  |  |  |  |  |  |  |  |  |  |           |  |  |  |  |  |  |  |  |  |
|  |  |  |  |  |  |  |  |  |  |  |  |  |  |  |           |  |  |  |  |  |  |  |  |  |
|  |  |  |  |  |  |  |  |  |  |  |  |  |  |  |           |  |  |  |  |  |  |  |  |  |
|  |  |  |  |  |  |  |  |  |  |  |  |  |  |  |           |  |  |  |  |  |  |  |  |  |
|  |  |  |  |  |  |  |  |  |  |  |  |  |  |  |           |  |  |  |  |  |  |  |  |  |
|  |  |  |  |  |  |  |  |  |  |  |  |  |  |  |           |  |  |  |  |  |  |  |  |  |
|  |  |  |  |  |  |  |  |  |  |  |  |  |  |  |           |  |  |  |  |  |  |  |  |  |
|  |  |  |  |  |  |  |  |  |  |  |  |  |  |  |           |  |  |  |  |  |  |  |  |  |
|  |  |  |  |  |  |  |  |  |  |  |  |  |  |  |           |  |  |  |  |  |  |  |  |  |
|  |  |  |  |  |  |  |  |  |  |  |  |  |  |  |           |  |  |  |  |  |  |  |  |  |
|  |  |  |  |  |  |  |  |  |  |  |  |  |  |  |           |  |  |  |  |  |  |  |  |  |
|  |  |  |  |  |  |  |  |  |  |  |  |  |  |  |           |  |  |  |  |  |  |  |  |  |
|  |  |  |  |  |  |  |  |  |  |  |  |  |  |  |           |  |  |  |  |  |  |  |  |  |
|  |  |  |  |  |  |  |  |  |  |  |  |  |  |  |           |  |  |  |  |  |  |  |  |  |
|  |  |  |  |  |  |  |  |  |  |  |  |  |  |  |           |  |  |  |  |  |  |  |  |  |
|  |  |  |  |  |  |  |  |  |  |  |  |  |  |  |           |  |  |  |  |  |  |  |  |  |
|  |  |  |  |  |  |  |  |  |  |  |  |  |  |  |           |  |  |  |  |  |  |  |  |  |
|  |  |  |  |  |  |  |  |  |  |  |  |  |  |  |           |  |  |  |  |  |  |  |  |  |
|  |  |  |  |  |  |  |  |  |  |  |  |  |  |  |           |  |  |  |  |  |  |  |  |  |
|  |  |  |  |  |  |  |  |  |  |  |  |  |  |  |           |  |  |  |  |  |  |  |  |  |
|  |  |  |  |  |  |  |  |  |  |  |  |  |  |  |           |  |  |  |  |  |  |  |  |  |
|  |  |  |  |  |  |  |  |  |  |  |  |  |  |  |           |  |  |  |  |  |  |  |  |  |
|  |  |  |  |  |  |  |  |  |  |  |  |  |  |  |           |  |  |  |  |  |  |  |  |  |
|  |  |  |  |  |  |  |  |  |  |  |  |  |  |  |           |  |  |  |  |  |  |  |  |  |
|  |  |  |  |  |  |  |  |  |  |  |  |  |  |  |           |  |  |  |  |  |  |  |  |  |
|  |  |  |  |  |  |  |  |  |  |  |  |  |  |  |           |  |  |  |  |  |  |  |  |  |
|  |  |  |  |  |  |  |  |  |  |  |  |  |  |  |           |  |  |  |  |  |  |  |  |  |
|  |  |  |  |  |  |  |  |  |  |  |  |  |  |  |           |  |  |  |  |  |  |  |  |  |
|  |  |  |  |  |  |  |  |  |  |  |  |  |  |  |           |  |  |  |  |  |  |  |  |  |
|  |  |  |  |  |  |  |  |  |  |  |  |  |  |  |           |  |  |  |  |  |  |  |  |  |
|  |  |  |  |  |  |  |  |  |  |  |  |  |  |  |           |  |  |  |  |  |  |  |  |  |
|  |  |  |  |  |  |  |  |  |  |  |  |  |  |  |           |  |  |  |  |  |  |  |  |  |
|  |  |  |  |  |  |  |  |  |  |  |  |  |  |  |           |  |  |  |  |  |  |  |  |  |
|  |  |  |  |  |  |  |  |  |  |  |  |  |  |  |           |  |  |  |  |  |  |  |  |  |
|  |  |  |  |  |  |  |  |  |  |  |  |  |  |  |           |  |  |  |  |  |  |  |  |  |
|  |  |  |  |  |  |  |  |  |  |  |  |  |  |  |           |  |  |  |  |  |  |  |  |  |
|  |  |  |  |  |  |  |  |  |  |  |  |  |  |  |           |  |  |  |  |  |  |  |  |  |
|  |  |  |  |  |  |  |  |  |  |  |  |  |  |  |           |  |  |  |  |  |  |  |  |  |
|  |  |  |  |  |  |  |  |  |  |  |  |  |  |  |           |  |  |  |  |  |  |  |  |  |
|  |  |  |  |  |  |  |  |  |  |  |  |  |  |  |           |  |  |  |  |  |  |  |  |  |
|  |  |  |  |  |  |  |  |  |  |  |  |  |  |  |           |  |  |  |  |  |  |  |  |  |
|  |  |  |  |  |  |  |  |  |  |  |  |  |  |  |           |  |  |  |  |  |  |  |  |  |
|  |  |  |  |  |  |  |  |  |  |  |  |  |  |  |           |  |  |  |  |  |  |  |  |  |
|  |  |  |  |  |  |  |  |  |  |  |  |  |  |  |           |  |  |  |  |  |  |  |  |  |
|  |  |  |  |  |  |  |  |  |  |  |  |  |  |  |           |  |  |  |  |  |  |  |  |  |
|  |  |  |  |  |  |  |  |  |  |  |  |  |  |  |           |  |  |  |  |  |  |  |  |  |
|  |  |  |  |  |  |  |  |  |  |  |  |  |  |  |           |  |  |  |  |  |  |  |  |  |
|  |  |  |  |  |  |  |  |  |  |  |  |  |  |  |           |  |  |  |  |  |  |  |  |  |
|  |  |  |  |  |  |  |  |  |  |  |  |  |  |  |           |  |  |  |  |  |  |  |  |  |
|  |  |  |  |  |  |  |  |  |  |  |  |  |  |  |           |  |  |  |  |  |  |  |  |  |
|  |  |  |  |  |  |  |  |  |  |  |  |  |  |  |           |  |  |  |  |  |  |  |  |  |
|  |  |  |  |  |  |  |  |  |  |  |  |  |  |  |           |  |  |  |  |  |  |  |  |  |
|  |  |  |  |  |  |  |  |  |  |  |  |  |  |  |           |  |  |  |  |  |  |  |  |  |
|  |  |  |  |  |  |  |  |  |  |  |  |  |  |  |           |  |  |  |  |  |  |  |  |  |
|  |  |  |  |  |  |  |  |  |  |  |  |  |  |  |           |  |  |  |  |  |  |  |  |  |
|  |  |  |  |  |  |  |  |  |  |  |  |  |  |  |           |  |  |  |  |  |  |  |  |  |
|  |  |  |  |  |  |  |  |  |  |  |  |  |  |  |           |  |  |  |  |  |  |  |  |  |
|  |  |  |  |  |  |  |  |  |  |  |  |  |  |  |           |  |  |  |  |  |  |  |  |  |
|  |  |  |  |  |  |  |  |  |  |  |  |  |  |  |           |  |  |  |  |  |  |  |  |  |
|  |  |  |  |  |  |  |  |  |  |  |  |  |  |  |           |  |  |  |  |  |  |  |  |  |
|  |  |  |  |  |  |  |  |  |  |  |  |  |  |  |           |  |  |  |  |  |  |  |  |  |
|  |  |  |  |  |  |  |  |  |  |  |  |  |  |  |           |  |  |  |  |  |  |  |  |  |
|  |  |  |  |  |  |  |  |  |  |  |  |  |  |  |           |  |  |  |  |  |  |  |  |  |
|  |  |  |  |  |  |  |  |  |  |  |  |  |  |  |           |  |  |  |  |  |  |  |  |  |
|  |  |  |  |  |  |  |  |  |  |  |  |  |  |  |           |  |  |  |  |  |  |  |  |  |
|  |  |  |  |  |  |  |  |  |  |  |  |  |  |  |           |  |  |  |  |  |  |  |  |  |
|  |  |  |  |  |  |  |  |  |  |  |  |  |  |  |           |  |  |  |  |  |  |  |  |  |
|  |  |  |  |  |  |  |  |  |  |  |  |  |  |  |           |  |  |  |  |  |  |  |  |  |
|  |  |  |  |  |  |  |  |  |  |  |  |  |  |  |           |  |  |  |  |  |  |  |  |  |
|  |  |  |  |  |  |  |  |  |  |  |  |  |  |  |           |  |  |  |  |  |  |  |  |  |
|  |  |  |  |  |  |  |  |  |  |  |  |  |  |  | </        |  |  |  |  |  |  |  |  |  |



## Section 3

|                  | (109) | 109                        | 120  | 130 | 140               | 150              | 162      |
|------------------|-------|----------------------------|------|-----|-------------------|------------------|----------|
| AJ579767.1 (100) |       | LMHDPVKYLNKRKARAFSNAEMFAIE | ELV  | LH  | TKERQLAVDLAAEREK  | TRLARRHP         |          |
| AY962360.1 (100) |       | LMHDPVKYLNKRKARAFSNAEMFAIE | ELV  | LY  | TKEKQLAVDLAAEREK  | TRLARRHP         |          |
| JQ819952.1 (100) |       | LMHDPVNYLNKRKARAFSNAEMFAIE | ELF  | LY  | TKEKQLAVDLAAEREK  | TRLARRHP         |          |
| DQ443744.1 (93)  |       | LMHDPVKYLNKRKARAFSNAEMFAIE | ELV  | LY  | TKEKQLAVDLAAEREK  | TRLARRHP         |          |
| DQ831495.1 (81)  |       | LMHDPVKYLNKRKARAFSNAETFAID | LV   | LY  | TKEKQLAVDLAAEREK  | TRLARRHP         |          |
| JN384024.1 (100) |       | LMHDPVKYLNKRKARAFSNAEMFAIE | ELV  | SY  | TKERQLAVDLAAEREK  | TRLARRHP         |          |
| KP284580.1 (100) |       | LMHDPVKYLNKRKARAFSNAETFAIE | ELV  | M   | H                 | TKERQLAVDLAAEREK | TRLARRHP |
| AJ579772.1 (100) |       | LMHDPVKYLNKRKARAFSNAETFAID | LV   | MY  | TKERQLAIDLAAEREK  | TRLARRHP         |          |
| HQ329238.1 (100) |       | LMHDPVKYLNKGKARPFSAEMFAID  | LV   | M   | H                 | TKERQLAVNLAAREK  | TRLARRHP |
| AY652904.1 (100) |       | LMHDPVKYLNKGKARAFSNAEMFAID | LV   | MY  | TKEKQLADDLAAEREK  | TRLARRHP         |          |
| KC202886.1 (100) |       | LMHDPVKYLNKGKARAFSNAEMFAID | LV   | MY  | TKEKQLAVNLAAREK   | TRLARRHP         |          |
| KC202889.1 (109) |       | LMHDPVKYLNKGKARAFSNAEMFAID | LV   | MY  | TKEKQLAVNLAAREK   | TRLARRHP         |          |
| AJ579769.1 (100) |       | LMHNPVEYLNKGKARAFSNAEMFAID | LV   | MY  | TKEKQSAVNLAAREK   | TRLARRHP         |          |
| AY962355.1 (100) |       | LMHDPVEYLSKRKARAFSNAEMFAID | LV   | MY  | TKERQLAVDLAAEREK  | TRLARRHP         |          |
| KC202888.1 (100) |       | LMHDPVKYLSKRKARAFSNAETI    | -AID | LV  | MY                | TKERQLAVDLAAEREK | TRLALNTQ |
| KC202887.1 (60)  |       | LMHDPVKYLSKRKARAFSNAEMFAID | LV   | MY  | TKERQLAVDLAAEREK  | TRLARKHP         |          |
| KC202908.1 (100) |       | LMHDPVKYLSKRKARAFSNAEMFAID | LV   | MY  | TKERQLAVDLAAEREK  | TRLARKHP         |          |
| FJ860136.1 (100) |       | LMHDPVKYLNKRKARAFSNAEMFAID | LV   | M   | H                 | TKERQLAVDLAAEREK | TRLARRHP |
| KP268377.1 (100) |       | LMHDPVKYLNKRKARAFSNAEMFAID | LV   | M   | H                 | TKERQLAVDLSAEREK | RLARRHP  |
| KC562141.1 (100) |       | LMHDPVKYLNKGKARAFSNAEMFAID | LV   | MY  | TKERQLAVNLTAAEREK | TRLARRHP         |          |

## Section 4

|                  | (163) | 163                   | 170                 | 180                       | 190                       | 200 | 216 |
|------------------|-------|-----------------------|---------------------|---------------------------|---------------------------|-----|-----|
| AJ579767.1 (154) |       | MRSPEETPEHYKFGT       | TAKAML              | PDVNAVDV                  | GDNEETSSEYPVSLSVSGGVLREHH |     |     |
| AY962360.1 (154) |       | MRSPEETPEHYKFGLT      | TAKAML              | PELNAVGV                  | GDNKDTSSEYPVSLSVSGGVLREHH |     |     |
| JQ819952.1 (154) |       | MRSPEETPEHYKFGMTAKA   | ILPELNAVGV          | GDNEDTSSDFPVFLSVSGGVLRE-- |                           |     |     |
| DQ443744.1 (147) |       | MRSPEETPEYKFGMTAKAML  | PELNAVVDV           | GDNEETSSEYPVSLSFAGVVL---- |                           |     |     |
| DQ831495.1 (135) |       | MRSPEETPEHYKFGMTAKAML | PEFNAVGV            | GDNEDTSSEYP-----          |                           |     |     |
| JN384024.1 (154) |       | IR                    | SPEETPEHYKFGMTAKAML | PDINAVDV                  | GDNEETSSEYPVSLSVSGGVLREHH |     |     |
| KP284580.1 (154) |       | MRSPEETPEHYKFGITAKAML | PDINAIDV            | GDNEDTSSEYPVSLSVSGVLREHH  |                           |     |     |
| AJ579772.1 (154) |       | MRSPEETPEYKFGRTAKAML  | PDINAVDV            | GDNEETSSEYPVSLSVSGGVLREHH |                           |     |     |
| HQ329238.1 (154) |       | MRSPEETPEYKFGMTAKAML  | PDINAINV            | GDNEDTSSEYPVSLSVSGGVLREHH |                           |     |     |
| AY652904.1 (154) |       | MRSPEETPEHYKFGMTAKAM  | IPDIDVVYV           | GDNEDTSSEYPVSLGVS         | DGVLREHH                  |     |     |
| KC202886.1 (154) |       | MRSPEETPEFYKFGITAKAML | PNINAVDV            | GDNEDTSSEYPVSLSVSD        | GVLRREHH                  |     |     |
| KC202889.1 (163) |       | MRSPEETPEFYKFGITAKAML | PNINAVDV            | GDNEDTSSETEESEV-----      |                           |     |     |
| AJ579769.1 (154) |       | MRSPEETPEHYKFGMTAKATL | PDINAVDV            | GDNEDTSSEYPVSLSVSNGVLREHH |                           |     |     |
| AY962355.1 (154) |       | MRSPEETPEHYKFGLTAKAML | PELNAVGV            | GDNEDTSSEYPVSLSVSGGVLREHH |                           |     |     |
| KC202888.1 (153) |       | CVLR-KKLRNIKFGMTAKAML | PDINIVDV            | GDNEDTSSEYRKSESFWRVS----  |                           |     |     |
| KC202887.1 (114) |       | MRSPEETPEHYKFGMTAKAML | PDINIVDVGE          | TTKTLFGDGVSLSVSGGVLREHH   |                           |     |     |
| KC202908.1 (154) |       | MRSPEETPEHYKFGMTAKAML | PDINVVDV            | GDNEDTSSEYPVSLST          | SGGVLREHH                 |     |     |
| FJ860136.1 (154) |       | MRSPEETPEHYKFGITAKAML | PDIDAIDV            | GDNEDTSSEYPVSLSVSGGVLREHH |                           |     |     |
| KP268377.1 (154) |       | MRSPEETPEHYKFGVTAKAML | PDINAIDV            | GDN-----                  |                           |     |     |
| KC562141.1 (154) |       | MRSPEETPEHYKFGMTAKV   | MLPDIDAVIDV         | DDNEDTLSECPVNLSVSGGVLREHH |                           |     |     |

---

(217) [217](#) [222](#)  
AJ579767.1 (208) [FI](#)----  
AY962360.1 (208) [FIL](#)---  
JQ819952.1 (206) -----  
DQ443744.1 (197) -----  
DQ831495.1 (175) -----  
JN384024.1 (208) [FIL](#)---  
KP284580.1 (208) [FI](#)----  
AJ579772.1 (208) [FI](#)----  
HQ329238.1 (208) [FIL](#)---  
AY652904.1 (208) [FV](#)----  
KC202886.1 (208) [FIL](#)---  
KC202889.1 (207) -----  
AJ579769.1 (208) [FI](#)----  
AY962355.1 (208) [FIL](#)---  
KC202888.1 (201) -----  
KC202887.1 (168) [FIL](#)---  
KC202908.1 (208) [FIRSNH](#)  
FJ860136.1 (208) [FIL](#)---  
KP268377.1 (186) -----  
KC562141.1 (208) [FI](#)----
