# Supplementary material for: Identification of Key Residues Required for RNA Silencing Suppressor Activity of p23 Protein from a Mild Strain of Citrus Tristeza Virus
Source: MDPI journal article supplement (doi:10.3390/v11090782), 2019-08-25
Supplement: s1 [file s1]

## Supplemental Table

**Table S1: CTV-N4 cloning primers**

| Primer ID      | Start on N4 | End on N4 | Sequence                    |
|----------------|-------------|-----------|-----------------------------|
| CTV-fragment1F | 21          | 42        | CCGTACCTCCGGAGCTCGATCCGGA   |
| CTV-fragment1R | 2965        | 2991      | AATCTGAAGGGTCTAGGCGAATCGGTA |
| CTV-fragment2F | 2935        | 2958      | TTCAGCACCGCGTCTTTACCATTG    |
| CTV-fragment2R | 4361        | 4384      | CTGAATGCCACAAAATAAATCGCG    |
| CTV-fragment3F | 4258        | 4279      | GAAAGGTAGGCAGAACGCAGAA      |
| CTV-fragment3R | 6012        | 6034      | CCTTCGATATACTAAGACACGCC     |
| CTV-fragment4F | 5935        | 5959      | GGACGAGTCGCTGCTTAGTGACACA   |
| CTV-fragment4R | 8931        | 8954      | TGCACCTTACCAAACGGACCTTCT    |
| CTV-fragment5F | 8881        | 8905      | AGCGGTGCCTGTTGTGAACACAGTA   |
| CTV-fragment5R | 11938       | 11962     | CTAACAGGCTTAGTCGTGCACCGAT   |
| CTV-fragment6F | 11901       | 11926     | GCCTTTGCCGGACTGATTATCATTGT  |
| CTV-fragment6R | 14971       | 14994     | AGTTGCGATACAGTCGCAAAGCCA    |
| CTV-fragment7F | 14939       | 14964     | TAGACGTCAGTTCATGGGACGTCACA  |
| CTV-fragment7R | 17504       | 17523     | TCATTCGCCGTGCCACCACT        |
| CTV-fragment8F | 17476       | 17500     | CTTTTTGCGCATCGTTATCATTCCT   |
| CTV-fragment8R | 19163       | 19189     | GGTTCACGCATACGTTAAGCCTCACTT |

**Table S2: CTV RNA silencing suppressor vector construction primers**

| Primer ID             | Sequence                                       |
|-----------------------|------------------------------------------------|
| PH7LIC3.1.1-CP-N4-F   | TGACAAGGATTACGCCGAGGTCATGGACGACGAAACAAAGAAATTG |
| PH7 LIC3.1.1-CP-N4-R  | GGATATCATTAGGGAAGAGGTTAACGTGTGTTAAATTTCCCA     |
| PH7 LIC3.1.1-p20-N4-F | TGACAAGGATTACGCCGAGGTCATGCGAGCTTACTTTAGTGTTAAC |
| PH7 LIC3.1.1-p20-N4-R | GGATATCATTAGGGAAGAGGTCACACGCAAGACGGAGAACTAAA   |
| PH7 LIC3.1.1-p23-N4-F | TGACAAGGATTACGCCGAGGTCATGGATGATACTAGCGGACAACT  |
| PH7 LIC3.1.1-p23-N4-R | GGATATCATTAGGGAAGAGGTCAGATGAAGTGGTGTTCACGGAGA  |

**Table S3: p23 mutant vector construction primers**

| Primer ID             | Sequence                                 |
|-----------------------|------------------------------------------|
| PH7LIC3.1.1-p23 M1-R  | CGCCGCTCTACCACAATCCACGC                  |
| PH7LIC3.1.1-p23 M1-F  | GATTGTGGTAGAGCGGCGGACAAGGCGCTCAAGA       |
| PH7LIC3.1.1-p23 M2-R  | CGCAGTCTTGAGCGCCTTG                      |
| PH7LIC3.1.1-p23 M2-F  | AAGGCGCTCAAGACTGCGCGTAAGTGTAAGGTCAAC     |
| PH7LIC3.1.1-p23 M3-R  | CGCCGCGTTGACCTTACACTTACG                 |
| PH7LIC3.1.1-p23 M3-F  | TGTAAGGTCAACGCGGCGCAATCTCAGAACGAGG       |
| PH7LIC3.1.1-p23 M4-R  | CGCAGATTGCGTGTTGTTGACC                   |
| PH7LIC3.1.1-p23 M4-F  | AACAACACGCAATCTGCGAACGAGGTGGCGCAT        |
| PH7LIC3.1.1-p23 M5-R  | CGCCGCGTTCTGAGATTGCGTG                   |
| PH7LIC3.1.1-p23 M5-F  | CAATCTCAGAACGCGGCGGCGCATATGTTGATGCA      |
| PH7LIC3.1.1-p23 M6-R  | CGCCGCATGCGCCACCTCGTT                    |
| PH7LIC3.1.1-p23 M6-F  | GAGGTGGCGCATGCGGCGATGCACGATCCCGTTA       |
| PH7LIC3.1.1-p23 M7-R  | CGCATCGTGTCATCAACAT                      |
| PH7LIC3.1.1-p23 M7-F  | ATGTTGATGCACGATGCGGTTAAGTATTTGAACA       |
| PH7LIC3.1.1-p23 M8-R  | CGCCGCCTTAACGGGATCGTGC                   |
| PH7LIC3.1.1-p23 M8-F  | GATCCCGTTAAGGCGGCGAACAAAAGAAAGGC         |
| PH7LIC3.1.1-p23 M9-R  | CGCAGCCTTTCTTTTGTTT                      |
| PH7LIC3.1.1-p23 M9-F  | AACAAAAGAAAGGCTGCGGCCTTTTCTAACGCAG       |
| PH7LIC3.1.1-p23 M10-R | CGCGGCTCTAGCCTTTCTT                      |
| PH7LIC3.1.1-p23 M10-F | AGAAAGGCTAGAGCCGCGTCTAACGCAGAGATGT       |
| PH7LIC3.1.1-p23 M11-R | CGCCGCAAACATCTCTGCGT                     |
| PH7LIC3.1.1-p23 M11-F | GCAGAGATGTTTGCGGCGGAACGGTTTCGTA          |
| PH7LIC3.1.1-p23 M12-R | CGCTTCAATCGCAAACATC                      |
| PH7LIC3.1.1-p23 M12-F | ATGTTTGCGATTGAAGCGGTTTCGTACACCAAG        |
| PH7LIC3.1.1-p23 M13-R | TGCTGCTGCGTACGAAACCAGTTCA                |
| PH7LIC3.1.1-p23 M13-F | TTTCGTACGCAGCAGCAAGGCAATTGGCGGTTCGATT    |
| PH7LIC3.1.1-p23 M14-R | CGCCGCTTCAGCGGCTAAATC                    |
| PH7LIC3.1.1-p23 M14-F | TAGCCGCTGAAGCGGCGAAGACGAGACTGGCT         |
| PH7LIC3.1.1-p23 M15-R | CGCTCTCGTCTTCTCCCTTTC                    |
| PH7LIC3.1.1-p23 M15-F | GAGAAGACGAGAGCGGCTCGTAGACACCCAATA        |
| PH7LIC3.1.1-p23 M16-R | CTTAGCAGTCATCGCCGCTTTATAATGTTCCGG        |
| PH7LIC3.1.1-p23 M16-F | GCGGCGATGACTGCTAAGGCA                    |
| PH7LIC3.1.1-p23 M17-R | CGCTAACATTGCCTTAGCA                      |
| PH7LIC3.1.1-p23 M17-F | GCTAAGGCAATGTTAGCGGACATCAACGCCGTAGA      |
| PH7LIC3.1.1-p23 M18-R | CGCGTCTACGGCGTTGATG                      |
| PH7LIC3.1.1-p23 M18-F | AACGCCGTAGACGCGGGTGATAACGAGGAAA          |
| PH7LIC3.1.1-p23- M-F  | GACAAGGATTACGCCGAGGTCATGGATGATACTAGCGGAC |
| PH7LIC3.1.1-p23-M-R   | ATATCATTAGGGAAGAGGTCAGATGAAGTGTTGTTAC    |

**Table S4: Northern Blot probe sequences (GFP probes include all probes except the miR156)**

| Oligo ID | Sequence                                  |
|----------|-------------------------------------------|
| G-1      | AGTAAAGGAGAAGAACTTTTCACTGGAGTTGTCCCAATTC  |
| G-2      | GTCCCAATTCTTGTTGAATTAGATGGTGATGTTAATGGGT  |
| G-3      | GTTAATGGGTACAAATTTTCTGTCAGTGGAGAGGGTGAAG  |
| G-4      | GAGGGTGAAGGTGATGCAACATACGGAAAACCTTACCCTTA |
| G-5      | CTTACCCTTAAATTTATTTGCACTACTGGAAAACCTACCTG |
| G-6      | AAACTACCTGTTCCATGGCCAACACTTGTCACTACTTTCT  |
| F-1      | TGGTGTTCATGCTTTTCAAGATACCCAGATCATATGAAG   |
| F-2      | TCATATGAAGCGGCACGACTTCTTCAAGAGCGCCATGCCT  |
| F-3      | CGCCATGCCTGAGGGATACGTGCAGGAGAGGACCATCTTC  |
| F-4      | GACCATCTTCTTCAAGGACGACGGGAACTACAAGACACGT  |
| F-5      | CAAGACACGTGCTGAAGTCAAGTTTGAGGGAGACACCCTC  |
| F-6      | AGACACCCTCGTCAACAGGATCGAGCTTAAGGGAATCGAT  |
| F-7      | GGGAATCGATTTCAAGGAGGACGGAAACATCCTCGGCCAC  |
| F-8      | CCTCGGCCACAAGTTGGAATACAACCTACAACCTCCACAAC |
| P-1      | GGCCGACAAGCAAAAAGAACGGCATCAAAGCCAACTTCAAG |
| P-2      | CAACTTCAAGACCCGCCACAACATCGAAGACGGCGGCGTG  |
| P-3      | CGGCGGCGTGCAACTCGCTGATCATTATCAACAAAATACT  |
| P-4      | ACAAAATACTCCAATTGGCGATGGCCCTGTCCTTTTACCA  |
| P-5      | CCTTTTACCAGACAACCATTACCTGTCCACACAATCTGCC  |
| P-6      | ACAATCTGCCCTTTCGAAAGATCCCAACGAAAAGAGAGAC  |
| P-7      | AAAGAGAGACCACATGGTCCTTCTTGAGTTTGTAACAGCT  |
| P-8      | TGTAACAGCTGCTGGGATTACACATGGCATGGATGAACTA  |
| P-9      | ACATGGCATGGATGAACTATACAAACATGATGAGCTTTGA  |
| MIR156   | GTGCTCACTCTCTTCTGTCA                      |

**Table S5: CTV RNA silencing suppressor Subcellular localization primers**

| Primer ID             | Sequence                                    |
|-----------------------|---------------------------------------------|
| pH7LIC5.1.1-C2B-F     | TACAAGGATTACGCCGAGGTCATGGATGTGTTGACAGTAGTGG |
| pH7LIC5.1.1-C2B-C     | GGATATCATTAGGGAAGAGGTCAAAACGACCCTTCGGCCC    |
| pH7LIC5.1.1- p23-N4-F | TACAAGGATTACGCCGAGGTCATGGATGATACTAGCGGACAAA |
| pH7LIC5.1.1 -p23-N4-C | GGATATCATTAGGGAAGAGGTCAGATGAAGTGGTGTTCAC    |
| pH7LIC5.1.1-t36-p23-F | TACAAGGATTACGCCGAGGTCATGGATAATACTAGCGGACAAA |
| pH7LIC5.1.1-t36-p23-C | GGATATCATTAGGGAAGAGGTCAGATGAAGTGGTGTTCAC    |
