# Supplementary material for: Identification of Key Residues Required for RNA Silencing Suppressor Activity of p23 Protein from a Mild Strain of Citrus Tristeza Virus
Source: MDPI journal article supplement (doi:10.3390/v11090782), 2019-08-25
Supplement: s1 [file s1]

## Supplemental Figure

**Figure S1: Subcellular localization of EV and C2b**

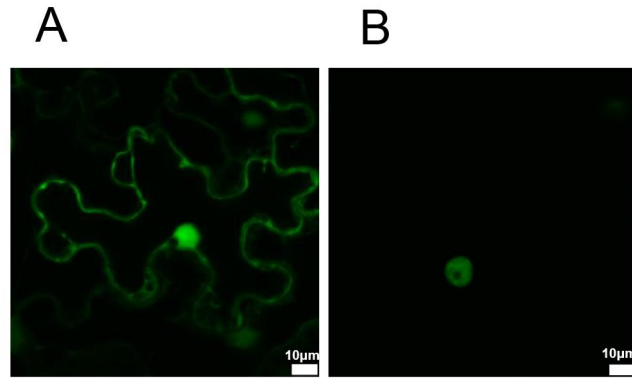

**Figure S1.** Subcellular localization of EV and C2b. (A) GFP-EV subcellular localization information. (B) GFP-C2b subcellular localization information.
